# Supplementary material for: Electrochemical reduction of benzoic acid esters using water as a H/D source
Source: Royal Society of Chemistry journal article supplement (doi:10.1039/d3gc03832g), 2023-12-27
Supplement: d3gc03832g1.pdf [file d3gc03832g1.pdf]

# Supplementary information

## Electrochemical Reduction of Benzoic Acid Esters using Water as H/D Source

Lei Zhang<sup>a</sup>, Mengfan Li<sup>b</sup>, Yin Yang<sup>a</sup>, Xu Cheng<sup>b,\*</sup>, and Qi-Lin Zhou<sup>a,\*</sup>

<sup>a</sup> State Key Laboratory and Institute of Elemento-Organic Chemistry, College of Chemistry, Frontiers Science Center for New Organic Matter, Nankai University, Tianjin 300071, China

<sup>b</sup> Jiangsu Key Laboratory of Advanced Organic Materials, National Demonstration Center for Experimental Chemistry Education, School of Chemistry and Chemical Engineering, Nanjing University, Nanjing, 210023, China

Correspondence to: [chengxu@nju.edu.cn](mailto:chengxu@nju.edu.cn); [qlzhou@nankai.edu.cn](mailto:qlzhou@nankai.edu.cn)

## Table of Contents

|                                                                                                            |    |
|------------------------------------------------------------------------------------------------------------|----|
| 1. General information .....                                                                               | 3  |
| 2. General procedures of electrochemical reduction of methyl benzoates .....                               | 4  |
| 3. Synthesis of substrates (new compounds) .....                                                           | 9  |
| 4. Optimization of reaction conditions .....                                                               | 12 |
| 4.1 Optimization of the electrochemical reduction of methyl benzoate with electron withdrawing group ..... | 12 |
| 4.2 Optimization of the electrochemical reduction of methyl benzoate with electron donating group. ....    | 14 |
| 5. Mechanism Study .....                                                                                   | 17 |
| 5.1 Cyclic voltammetry experiments of reactants .....                                                      | 17 |
| 5.2. Deuteration reaction with MeCN- <i>d</i> <sub>3</sub> as solvent. ....                                | 27 |
| 5.3. Confirmation of byproduct structures .....                                                            | 28 |
| 5.4. Benzaldehyde as substrate in standard condition. ....                                                 | 29 |
| 5.5. Electron paramagnetic resonance (EPR) experiments. ....                                               | 30 |
| 5.6. Free radical trapping experiments.....                                                                | 31 |
| 5.7. Electrochemical reduction of phenyl 4-cyanobenzoate to detect reductive products....                  | 31 |
| 5.8. Oxygen detection. ....                                                                                | 32 |
| 5.9. Observation of DMSO during the rAP reaction. ....                                                     | 34 |
| 5.10. Experiments for kinetic study without / with tertiary butanol ( <sup>t</sup> BuOH). ....             | 34 |
| 5.11. Experiments with Et <sub>3</sub> N. ....                                                             | 35 |
| 5.12. Stability experiment of 4-methylbenzyl alcohol (2b). ....                                            | 36 |
| 5.13. Measured the conversion of methyl 4-methylbenzoate (II) in a short time. ....                        | 36 |
| 5.14. The H <sub>2</sub> gas evolution reaction. ....                                                      | 37 |
| 5.15. Other Li <sup>+</sup> salt as electrolyte with dimethyl terephthalate (I). ....                      | 37 |
| 6. Unsuccessful substrates .....                                                                           | 38 |
| 7. Analytic data of products .....                                                                         | 39 |
| 8. References.....                                                                                         | 48 |
| 9. NMR spectra for new substrates and intermediates.....                                                   | 50 |
| 10. NMR spectra for products.....                                                                          | 61 |

## 1. General information

All reagents were commercial and were used without further purification. Acetonitrile (MeCN) was purchased from Damao Chemical Reagent Company and water comes from municipal water. Column chromatography was performed on silica gel (300-400 mesh) and reactions were monitored by thin-layer chromatography (TLC) using 254 nm UV light for visualization, and phosphomolybdic acid heat as developing agents.  $^1\text{H}$  NMR (400 MHz or 600MHz),  $^{13}\text{C}$  NMR (101 MHz or 150 MHz),  $^{19}\text{F}$  (376 MHz),  $^{31}\text{P}$  (162 MHz) and  $^{11}\text{B}$  (128 MHz) were measured on Bruker Avance III 400 or 600 spectrometer. Chemical shifts are expressed in parts per million (ppm) with respect to tetramethylsilane. Coupling constants were reported as Hertz (Hz), signal shapes and splitting patterns were indicated as follows: s = singlet; d = doublet; t = triplet; q = quartet; m = multiplet. High-resolution mass spectra (HRMS) were recorded on Agilent mass spectrometer equipped with the ESI or APCI source and a Q-TOF detector.

## 2. General procedures of electrochemical reduction of methyl benzoates

### 2.1. General procedure for methyl benzoates with electron-withdrawing group (General procedure

A):

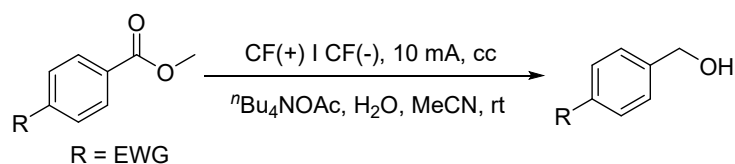

To a 10 mL two-necked heart-shaped flask was charged with the substrate (0.3 mmol),  $n\text{Bu}_4\text{NOAc}$  (90.4 mg, 0.3 mmol, 1.0 equiv),  $\text{H}_2\text{O}$  (1 ml), MeCN (6 ml) and a magnetic stir bar. The bottle was equipped with a rubber stopper, through which carbon felts (CF, 1.5 cm x 1 cm x 0.5 cm) as anode and cathode were installed. Two electrodes were attached to a titanium wire and separated with a Teflon film. A Teflon wire tied around two electrodes. The whole cell was an undivided cell. The mixture was stirred under room temperature and 10 mA constant current electrolysis, and reacted until the substrates disappear. The reaction mixture was concentrated under the reduced pressure. The yield was measured by  $^1\text{H}$  NMR analysis of crude reaction mixture with mesitylene as an internal standard. The residue was purified by flash chromatography to afford the desired product. Followings are the photographic guide for the reaction.

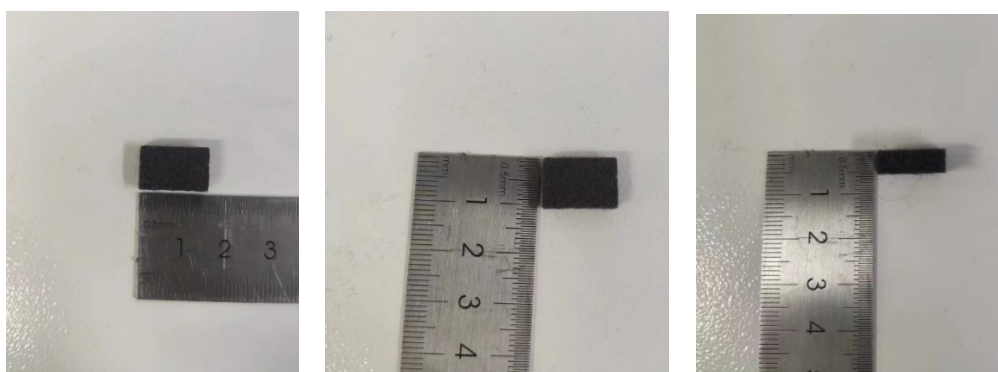

Figure S1. Size of graphite felt anode

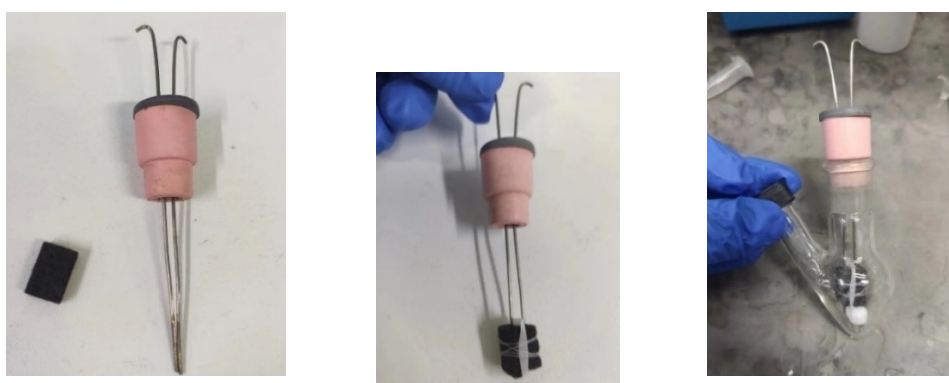

Figure S2. Electrodes and electrochemical cell



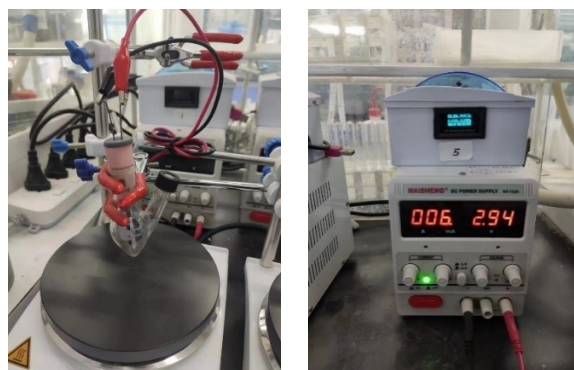

Figure S3. Details and equipment of the electrochemical reaction

## 2.2. General procedure for methyl benzoates with electron-donating group (General procedure B):

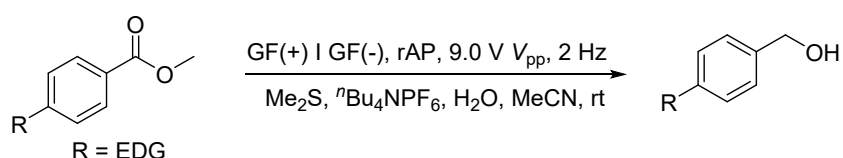

To a 10 mL two-necked heart-shaped flask was charged with the substrate (0.3 mmol), Me<sub>2</sub>S (55.8 mg, 0.9 mmol, 3.0 equiv), <sup>n</sup>Bu<sub>4</sub>NPF<sub>6</sub> (116.2 mg, 0.3 mmol, 1.0 equiv), H<sub>2</sub>O (1 ml), MeCN (6 ml) and a magnetic stir bar. The bottle was equipped with a rubber stopper, through which graphite felts (GF, 1.5 cm x 1 cm x 0.5 cm) as anode and cathode were installed. Two electrodes were attached to a titanium wire and separated with a Teflon film. A Teflon wire tied around two electrodes. The whole cell was an undivided cell. The rAP power supply constituted with a combination of a signal generator and an amplifier. The rAP waveform was generated from a signal generator (FeelElec, FY6900-20M) and the output was adjusted by an amplifier (FPA2000-30W). The mixture was stirred under room temperature and 9.0 V *V*<sub>pp</sub> of rAP (detected by oscilloscope, set 0.9 V on signal generator, peak to peak, 0.45 V from the offset, alternating frequency: 2 Hz, the current was around 60 mA) were applied to the reaction until the substrates disappear. The reaction mixture was concentrated under the reduced pressure. The yield was measured by <sup>1</sup>H NMR analysis of the crude reaction mixture with mesitylene as an internal standard. The residue was purified by flash chromatography to afford the desired product. Followings are the photographic guide for the reaction.

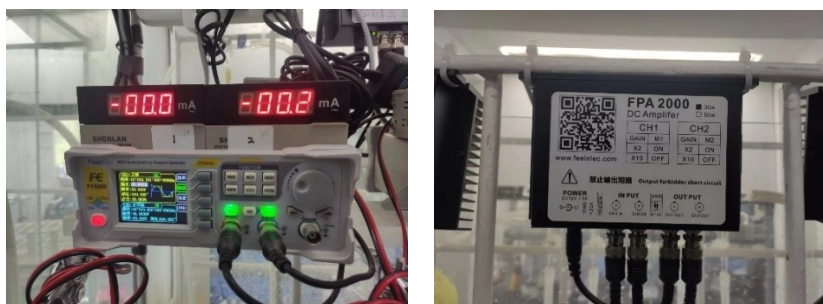

Figure S4. Left: signal generator. Right: amplifier

## 2.3. General procedure for methyl benzoates with electron-withdrawing group using D<sub>2</sub>O as hydrogen source (General procedure C):

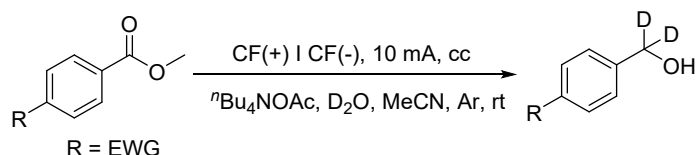

To a 10 mL two-necked heart-shaped flask under Ar atmosphere was charged with the substrate (0.3 mmol),  $t\text{Bu}_4\text{NOAc}$  (90.4 mg, 0.3 mmol, 1.0 equiv),  $\text{D}_2\text{O}$  (300 mg, 1.5 mmol, 50 equiv), MeCN (6.5 ml, extra dry with molecular sieves, water < 30 ppm) and a magnetic stir bar. The equipment was same as in **General procedure A**. The mixture was stirred under room temperature and 10 mA constant current electrolysis, and reacted until the substrates disappear. The reaction mixture was concentrated under the reduced pressure. The residue was purified by flash chromatography to afford the desired product.

#### 2.4. General procedure for methyl benzoates with electron-donating group using $\text{D}_2\text{O}$ as hydrogen source (General procedure D):

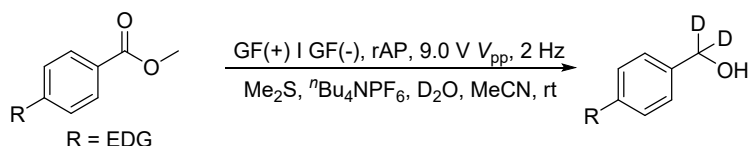

To a 10 mL two-necked heart-shaped flask under Ar atmosphere was charged with the substrate (0.3 mmol),  $\text{Me}_2\text{S}$  (55.8 mg, 0.9 mmol, 3.0 equiv),  $t\text{Bu}_4\text{NPF}_6$  (116.2 mg, 0.3 mmol, 1.0 equiv),  $\text{D}_2\text{O}$  (300 mg, 1.5 mmol, 50 equiv), MeCN (6.5 ml, extra dry with molecular sieves, water < 30 ppm) and a magnetic stir bar. The equipment was same as in **General procedure B**. The mixture was stirred under room temperature and 9.0 V  $V_{pp}$  of rAP (detected by oscilloscope, set 0.9 V on signal generator, peak to peak, 0.45 V from the offset, alternating frequency: 2 Hz, the current was around 60 mA), and reacted until substrates disappear. The reaction mixture was concentrated under the reduced pressure. The residue was purified by flash chromatography to afford the desired product.

#### 2.5 Gram scale reaction of electrochemical reduction of dimethyl terephthalate:

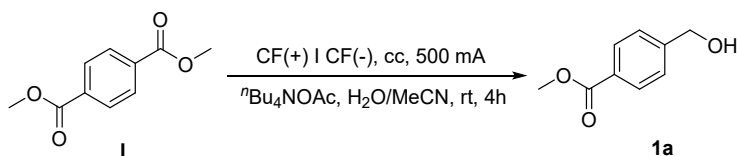

To a 250 mL glass beaker was charged with dimethyl terephthalate (5.82 g, 30 mmol),  $t\text{Bu}_4\text{NOAc}$  (2.26 g, 7.5 mmol, 0.25 equiv),  $\text{H}_2\text{O}$  (25 ml), MeCN (150 ml) and a magnetic stir bar. The bottle was equipped with a paper case cover, through which carbon felts (4 cm x 18 cm x 0.5 cm) as anode and cathode were installed. Two electrodes were attached to a titanium wire and separated with polypropylene foam (pore diameter: 200  $\mu\text{m}$  aperture). A Teflon wire tied around two electrodes. The whole cell was an undivided cell. The mixture was stirred under room temperature and 500 mA constant current electrolysis, and reacted for 4 h. The reaction mixture was concentrated under the reduced pressure, and the residue was purified by flash chromatography (PE/EtOAc = 2/1) to afford the desired product as a white solid with 62.7% yield (3.12 g). Followings are the photographic guide for the reaction.

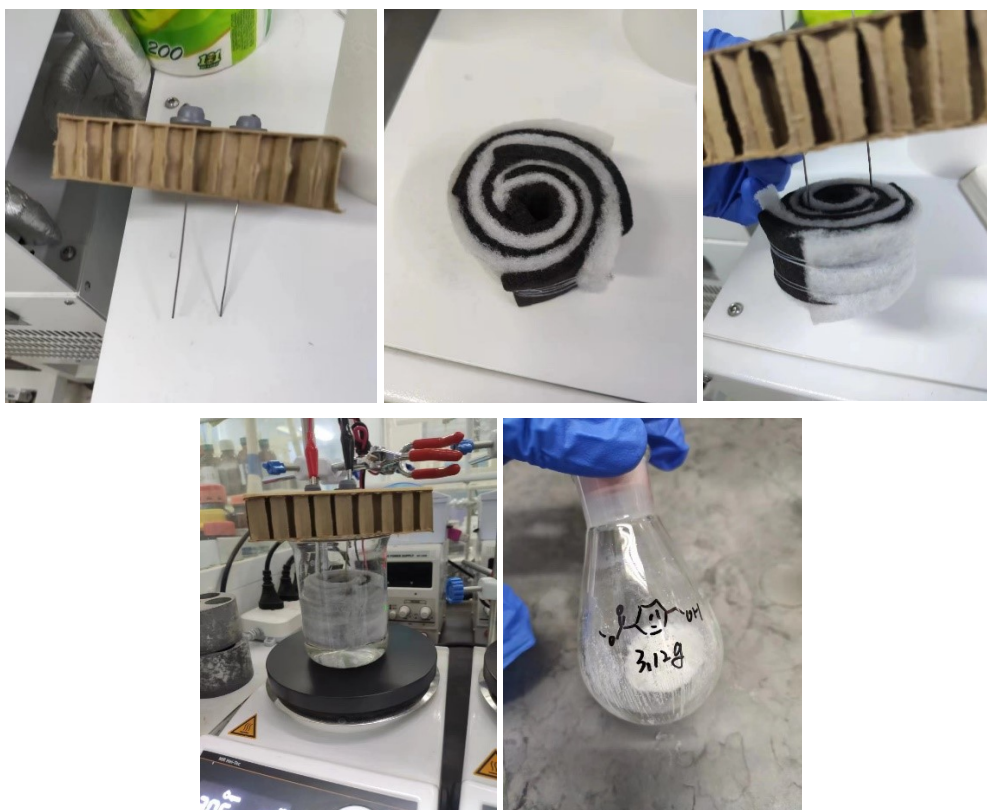

**Figure S5.** Details and the equipment for the gram scale reaction of dimethyl terephthalate

### 2.6 Gram scale reaction of electrochemical reduction of methyl 4-phenylbenzoate:

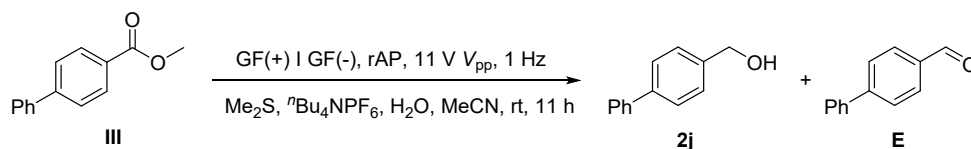

To a 250 mL eggplant shaped bottle was charged with the methyl 4-phenylbenzoate (1.27 g, 6 mmol), Me<sub>2</sub>S (744 mg, 12 mmol, 2.0 equiv), <sup>t</sup>Bu<sub>4</sub>NPF<sub>6</sub> (2.32 g, 6 mmol, 1.0 equiv), H<sub>2</sub>O (20 ml), MeCN (120 ml) and a magnetic stir bar. The bottle was equipped with a rubber stopper, through which graphite felts (1.5 cm x 2 cm x 0.5 cm) as anode and cathode were installed. Two electrodes were attached to a titanium wire and separated with a Teflon film. A Teflon wire tied around two electrodes. The whole cell was an undivided cell. The rAP power supply constituted with a combination of a signal generator and an amplifier. The rAP waveform was generated from a signal generator (FeelElec, FY6900-20M) and the output was adjusted by an amplifier (FPA2000-30W). The mixture was stirred under room temperature and 11 V *V*<sub>pp</sub> of rAP (detected by oscilloscope, set 1.1 V on signal generator, peak to peak, 0.55 V from the offset, alternating frequency: 1 Hz, the current was around 150 mA), and reacted for 11 h. The reaction mixture was concentrated under the reduced pressure, and residue was purified by flash chromatography (PE/EtOAc = 4/1) to afford the desired product as a white solid with 71% yield (780 mg). 4-Biphenylcarboxaldehyde (41 mg) was obtained as a white solid (PE/EtOAc = 50/1). <sup>1</sup>H NMR (400 MHz, chloroform-*d*) δ 10.04 (s, 1H), 7.99 – 7.89 (m, 2H), 7.77 – 7.70 (m, 2H), 7.68 – 7.59 (m, 2H), 7.51 – 7.45 (m, 2H), 7.43 – 7.38 (m, 1H). <sup>13</sup>C NMR (151 MHz, chloroform-*d*) δ 192.2, 147.2, 139.7, 135.2, 130.4, 129.1, 128.6, 127.8, 127.5. Followings are the photographic guide for the reaction.

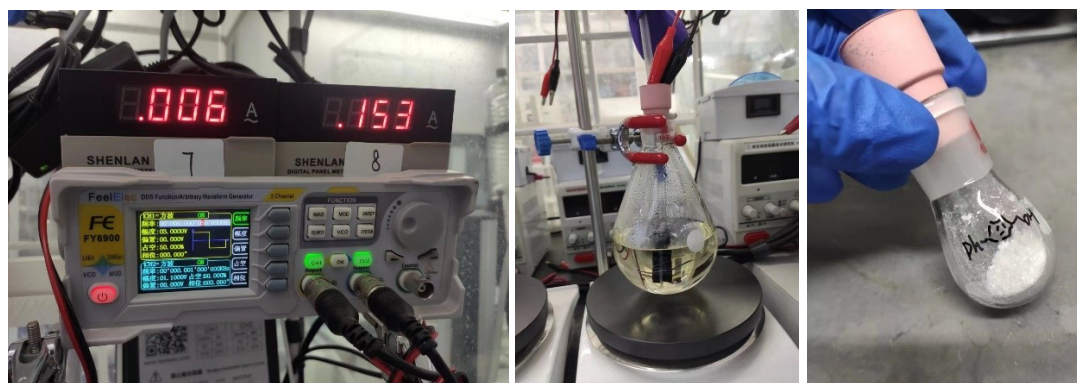

Figure S6. Details and the equipment for the gram scale reaction of methyl 4-phenylbenzoate

### 3. Synthesis of substrates (new compounds)

#### 3.1. General procedure for the synthesis of methyl 3-alkoxyl-4-cyanobenzoates:

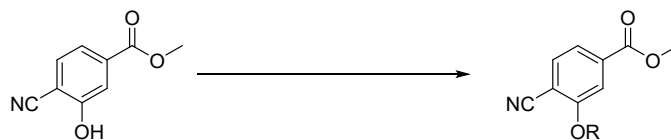

**Method A:** To a solution of methyl 4-cyano-3-hydroxybenzoate (442.5 mg, 2.5 mmol) in DMF (10 ml) was added NaH (60%, 150 mg, 3.75 mmol, 1.5 equiv), and the mixture was stirred for 10 min. Alkyl halide (3.75 mmol, 1.5 equiv) was added to the solution and the mixture was stirred for 10 h. After the reaction was completed (monitored by TLC), the reaction solution was quenched by adding aq.  $\text{NH}_4\text{Cl}$  (50 ml), extracted by EtOAc (50 ml x 2). The organic layers were combined, washed by  $\text{H}_2\text{O}$  (50 ml x 3) and aq. NaCl (50 ml x 1), dried over  $\text{Na}_2\text{SO}_4$ , filtered and concentrated. The residue was purified by flash chromatography to afford the desired product.

**Method B:** To a solution of methyl 4-cyano-3-hydroxybenzoate (442.5 mg, 2.5 mmol) in acetone (10 ml) was added  $\text{K}_2\text{CO}_3$  (659 mg, 5 mmol, 2 equiv) and alkyl halide (3.25 mmol, 1.3 equiv). The solution was stirred at reflux for 6 h. After the reaction was completed (monitored by TLC), the reaction solution was cooled to room temperature, filtered and concentrated. The residue was diluted with EtOAc (50 ml), washed by aq. NaCl (50 ml x 1), dried over  $\text{Na}_2\text{SO}_4$ , filtered and concentrated. The solid residue was washed by PE/EtOAc (10:1) to afford the desired product.

#### Methyl 3-(but-3-en-1-yloxy)-4-cyanobenzoate

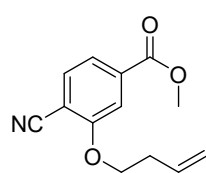

Following the **method A** with 4-bromobut-1-ene, the desired product was obtained as a white solid in 57% yield (330 mg). Melting point: 64 – 66 °C.  $^1\text{H}$  NMR (400 MHz, chloroform-*d*)  $\delta$  7.79 – 7.50 (m, 3H), 5.98 – 5.88 (m, 1H), 5.40 – 5.07 (m, 2H), 4.19 (t,  $J$  = 6.7 Hz, 2H), 3.95 (s, 3H), 2.64 (q,  $J$  = 6.7 Hz, 2H).  $^{13}\text{C}$  NMR (101 MHz, chloroform-*d*)  $\delta$  165.6, 160.5, 135.4, 133.8, 133.4, 121.6, 118.0, 115.6, 112.9, 106.2, 68.6, 52.8, 33.2. HRMS  $m/z$  (ESI) called for  $\text{C}_{13}\text{H}_{13}\text{NO}_3\text{Na}^+$  ( $M + \text{Na}$ ) $^+$  254.0793, found 354.0789.

#### Methyl 4-cyano-3-((5-cyanopentyl)oxy)benzoate

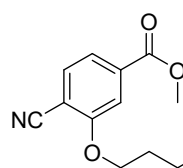

Following the **method A** with 6-bromohexanenitrile, the desired product was obtained as a yellow solid in 60% yield (485 mg). Melting point: 62 – 64 °C.  $^1\text{H}$  NMR (400 MHz, chloroform-*d*)  $\delta$  7.76 – 7.54 (m, 3H), 4.19 (t,  $J$  = 6.1 Hz, 2H), 3.97 (s, 3H), 2.44 (t,  $J$  = 6.9 Hz, 2H), 2.00 – 1.91 (m, 2H), 1.86 – 1.78 (m, 2H), 1.78 – 1.69 (m, 2H).  $^{13}\text{C}$  NMR (101 MHz, chloroform-*d*)  $\delta$  165.5, 160.5, 135.5, 133.8, 121.7, 119.6, 115.6, 112.8, 106.1, 68.9, 52.8, 28.1, 25.3, 25.1, 17.2. HRMS  $m/z$  (ESI) called for  $\text{C}_{15}\text{H}_{16}\text{N}_2\text{O}_3\text{Na}^+$  ( $M + \text{Na}$ ) $^+$  295.1059, found 295.1058.

#### Methyl 4-cyano-3-(prop-2-yn-1-yloxy)benzoate

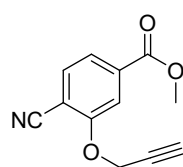

Following the **method B** with 3-bromoprop-1-yne, the desired product was obtained as a yellow solid in 93% yield (500 mg). Melting point: 137 – 139 °C.  $^1\text{H}$  NMR (400 MHz, chloroform-*d*)  $\delta$  7.79 (d,  $J$  = 1.3 Hz, 1H), 7.73 (dd,  $J$  = 8.0, 1.3 Hz, 1H), 7.67 (d,  $J$  = 8.0 Hz, 1H), 4.90 (d,  $J$  = 2.4 Hz, 2H), 3.97 (s, 3H), 2.61 (d,  $J$  = 2.4 Hz, 1H).  $^{13}\text{C}$  NMR (101 MHz, chloroform-*d*)  $\delta$  165.4, 159.0, 135.4, 133.9, 115.3, 113.7, 106.6, 77.4, 77.3 (d,  $J$  =

12.3 Hz), 76.6 (d,  $J = 2.5$  Hz), 56.8, 52.9. HRMS  $m/z$  (ESI) called for  $C_{12}H_9NO_3Na^+$  ( $M + Na$ ) $^+$  238.0480, found 238.0478.

#### Methyl 4-cyano-3-(2-fluoroethoxy)benzoate

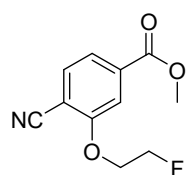

Following the **method A** with 1-fluoro-2-iodoethane, the desired product was obtained as a white solid in 61% yield (340 mg). Melting point: 142 – 144 °C.  $^1H$  NMR (400 MHz, chloroform- $d$ )  $\delta$  7.76 – 7.60 (m, 3H), 4.95 – 4.86 (m, 1H), 4.83 – 4.74 (m, 1H), 4.51 – 4.43 (m, 1H), 4.42 – 4.36 (m, 1H), 3.96 (s, 3H).  $^{13}C$  NMR (101 MHz, chloroform- $d$ )  $\delta$  165.4, 160.0, 135.5, 134.0, 122.3, 115.3, 113.1, 106.5, 81.3 (d,  $J = 172.5$  Hz), 68.5 (d,  $J = 21.2$  Hz), 52.8.  $^{19}F$  NMR (376 MHz, chloroform- $d$ )  $\delta$  -223.59. HRMS  $m/z$  (ESI) called for  $C_{11}H_{10}FNO_3Na^+$  ( $M + Na$ ) $^+$  246.0542, found 246.0540.

#### Methyl 4-cyano-3-(4-(methoxycarbonyl)phenethoxy)benzoate

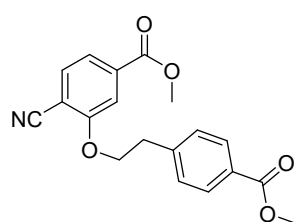

Following the **method B** with methyl 4-(2-bromoethyl)benzoate, the desired product was obtained as a yellow solid in 9.4 % yield (80 mg). Melting point: 169 – 171 °C.  $^1H$  NMR (400 MHz, chloroform- $d$ )  $\delta$  8.01 (d,  $J = 8.2$  Hz, 2H), 7.68 – 7.59 (m, 2H), 7.56 (d,  $J = 1.3$  Hz, 1H), 7.43 (d,  $J = 8.2$  Hz, 2H), 4.34 (t,  $J = 6.5$  Hz, 2H), 3.93 (s, 3H), 3.91 (s, 3H), 3.24 (t,  $J = 6.5$  Hz, 2H).  $^{13}C$  NMR (101 MHz, chloroform- $d$ )  $\delta$  167.0, 165.5, 160.3, 142.9, 135.4, 133.8, 129.9, 129.4, 128.8, 121.8, 115.5, 112.7, 106.2, 69.5, 52.8, 52.1, 35.5. HRMS  $m/z$  (ESI) called for  $C_{19}H_{17}NO_5Na^+$  ( $M + Na$ ) $^+$  362.1004, found 362.1004.

### 3.2. Synthesis of methyl 4-(butyryloxy)benzoate

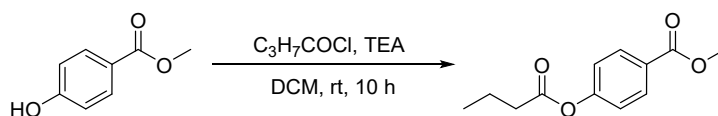

To a solution of methyl 4-hydroxybenzoate (761 mg, 5 mmol) and  $Et_3N$  (758 mg, 7.5 mmol, 1.5 equiv) in DCM (10 ml) was added butyryl chloride (586 mg, 5.5 mmol, 1.1 equiv) dropwise. The mixture was stirred at room temperature for 10 h. After the reaction was completed (monitored by TLC), the reaction solution was diluted with DCM (50 ml), washed by aq.  $NaHCO_3$  (50 ml x 1) and aq.  $NaCl$  (50 ml x 1), dried over  $Na_2SO_4$ , filtered and concentrated. The residue was purified by flash chromatography (PE/EtOAc = 10/1) to give pure product as a colorless oil in 95% yield (1.05 g).  $^1H$  NMR (400 MHz, chloroform- $d$ )  $\delta$  8.07 (d,  $J = 8.7$  Hz, 2H), 7.16 (d,  $J = 8.7$  Hz, 2H), 3.91 (s, 3H), 2.56 (t,  $J = 7.4$  Hz, 2H), 1.79 (q,  $J = 7.4$  Hz, 2H), 1.05 (t,  $J = 7.4$  Hz, 3H).  $^{13}C$  NMR (101 MHz, chloroform- $d$ )  $\delta$  171.5, 166.3, 154.4, 131.1, 127.6, 121.6, 52.2, 36.1, 18.4, 13.6. HRMS  $m/z$  (ESI) called for  $C_{12}H_{14}O_4Na^+$  ( $M + Na$ ) $^+$  245.0790, found 245.0788.

### 3.3. Synthesis of methyl 5-acetamido-2-(2-chloroethoxy)benzoate.

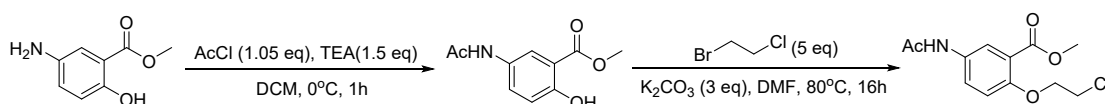

To a solution of methyl 5-amino-2-hydroxybenzoate (836 mg, 5 mmol) and  $Et_3N$  (755 mg, 7.5 mmol, 1.05 equiv) in DCM (25 ml) was added acetyl chloride (412 mg, 5.25 mmol, 1.01 equiv) dropwise at 0 °C. The mixture was stirred at 0 °C for 1 h. After the reaction was completed (monitored by TLC), the reaction solution was diluted with DCM (50 ml), washed by aq.  $NaHCO_3$  (50 ml x 1) and aq.  $NaCl$  (50

ml x 1), dried over Na<sub>2</sub>SO<sub>4</sub>, filtered and concentrated. The residue was washed by PE/EtOAc = 10/1 to give methyl 5-acetamido-2-hydroxybenzoate as a brown solid in 92% yield (0.97 g). <sup>1</sup>H NMR (400 MHz, chloroform-d) δ 10.62 (s, 1H), 8.02 (d, *J* = 2.6 Hz, 1H), 7.49 (dd, *J* = 9.0, 2.7 Hz, 1H), 7.33 (s, 1H), 6.94 (d, *J* = 8.9 Hz, 1H), 3.93 (s, 3H), 2.16 (s, 3H).

A solution of methyl 5-acetamido-2-hydroxybenzoate (530 mg, 2.54 mmol), K<sub>2</sub>CO<sub>3</sub> (1.05 g, 7.62 mmol, 3 equiv) and 1-bromo-2-chloroethane (1.82 g, 12.7 mmol, 5 equiv) in DMF (10 ml) was stirred at 80 °C for 16 h. After the reaction was completed (monitored by TLC), the reaction solution was diluted with EA (50 ml), washed by aq. NaCl (30 ml x 3), dried over Na<sub>2</sub>SO<sub>4</sub>, filtered and concentrated. The residue was purified by flash chromatography (PE/EtOAc = 10/1) to give pure product as a white solid in 55% yield (375 mg). <sup>1</sup>H NMR (400 MHz, chloroform-d) δ 7.81 – 7.74 (m, 2H), 7.38 (d, *J* = 13.7 Hz, 1H), 6.95 (d, *J* = 8.7 Hz, 1H), 4.27 (t, *J* = 6.0 Hz, 2H), 3.88 (s, 3H), 3.83 (t, *J* = 6.1 Hz, 2H), 2.17 (s, 3H). <sup>13</sup>C NMR (101 MHz, Chloroform-*d*) δ 168.4, 166.1, 154.5, 131.7, 125.7, 123.4, 121.4, 115.6, 70.1, 52.2, 41.7, 24.4.

## 4. Optimization of reaction conditions

### 4.1 Optimization of the electrochemical reduction of methyl benzoate with electron withdrawing group

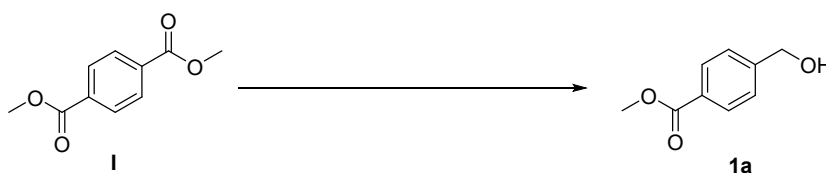

#### 4.1.1 Screen of the cathode

| cathode    | yield | cathode | yield | cathode | yield | cathode | yield |
|------------|-------|---------|-------|---------|-------|---------|-------|
| CF         | 65%   | RVC     | 15%   | Ag      | 46%   | Zn      | 15%   |
| carbon rod | 36%   | Fe      | 61%   | Al      | 19%   | Pb      | 11%   |
|            |       | Cu      | 30%   | Ni      | 0%    | Pt      | 32%   |

Condition: **I** (0.3 mmol), Et<sub>3</sub>N (2.4 mmol), Zn(OTf)<sub>2</sub> (0.06 mmol), H<sub>2</sub>O (15 mmol), <sup>n</sup>Bu<sub>4</sub>NI (0.3 mmol), MeCN (7 mL), carbon felt (1 cm × 1.5 cm × 0.5 cm) as anode, 13.3 mA/cm<sup>3</sup>, rt, 8 h. Yields were determined by HNMR with mesitylene as an internal standard.

#### 4.1.2 Screen of the anode

| anode       | yield | anode | yield | anode      | yield | anode | yield |
|-------------|-------|-------|-------|------------|-------|-------|-------|
| carbon felt | 65%   | RVC   | 50%   | carbon rod | 0%    | Pt    | 30%   |

Condition: **I** (0.3 mmol), Et<sub>3</sub>N (2.4 mmol), Zn(OTf)<sub>2</sub> (0.06 mmol), H<sub>2</sub>O (15 mmol), <sup>n</sup>Bu<sub>4</sub>NI (0.3 mmol), MeCN (7 mL), carbon felt (1 cm × 1.5 cm × 0.5 cm) as cathode, 13.3 mA/cm<sup>3</sup>, rt, 8 h. Yields were determined by HNMR with mesitylene as an internal standard.

#### 4.1.3 Screen of the electrolyte

| electrolyte                       | yield | electrolyte                     | yield | electrolyte                                   | yield |
|-----------------------------------|-------|---------------------------------|-------|-----------------------------------------------|-------|
| <sup>n</sup> Bu <sub>4</sub> NOAc | 71%   | <sup>n</sup> Bu <sub>4</sub> NI | 13%   | <sup>n</sup> Bu <sub>4</sub> ClO <sub>4</sub> | 50%   |
| LiOAc                             | 0     | LiOCl <sub>4</sub>              | 0     |                                               |       |

Condition: **I** (0.3 mmol), H<sub>2</sub>O (6 mmol), electrolyte (0.3 mmol), MeCN (7 mL), carbon felt (1 cm × 1.5 cm × 0.5 cm) as anode and cathode, C.V. = 3.8 V, rt, 10 h. Yields were determined by HNMR with mesitylene as an internal standard.

#### 4.1.4 Screen of the constant voltage (C. V.) and constant current(C. C.)

| C. V. | yield                  | C. C. | yield                  |
|-------|------------------------|-------|------------------------|
| 4.0 V | 53%                    | 5 mA  | 0% (100%) <sup>a</sup> |
| 3.8 V | 71%                    | 10 mA | 53% (24%) <sup>b</sup> |
| 3.7 V | 73%                    | 15 mA | 19% (40%) <sup>b</sup> |
| 3.0 V | 0% (100%) <sup>a</sup> | 20 mA | 0% (71%) <sup>b</sup>  |

Condition: **I** (0.3 mmol), H<sub>2</sub>O (6 mmol), <sup>n</sup>Bu<sub>4</sub>NOAc (0.15 mmol), MeCN (7 mL), carbon felt (1 cm × 1.5 cm × 0.5 cm) as anode and cathode, C.V. or C. C., rt, 6 h. Yields were determined by HNMR with mesitylene as an internal standard. <sup>a</sup> SM recovered. <sup>b</sup> yields of methyl 4-methylbenzoate.

#### 4.1.5 Screen of the solvent

| solvent | yield | solvent | yield | solvent | yield |
|---------|-------|---------|-------|---------|-------|
|---------|-------|---------|-------|---------|-------|



|                           |                        |               |                        |         |                        |
|---------------------------|------------------------|---------------|------------------------|---------|------------------------|
| MeCN                      | 63%                    | MeOH          | 32%                    | THF     | 43% (20%) <sup>a</sup> |
| DMF                       | 33% (27%) <sup>a</sup> | <i>i</i> PrOH | 35% (40%) <sup>a</sup> | HFIP    | 0%                     |
| DMSO                      | 28%                    | DCE           | 37%                    | acetone | 31%                    |
| MeCN/H <sub>2</sub> O=6/1 | 83%                    |               |                        |         |                        |

Condition: **I** (0.3 mmol), H<sub>2</sub>O (6 mmol), <sup>n</sup>Bu<sub>4</sub>NOAc (0.15 mmol), solvent (7 mL), carbon felt (1 cm × 1.5 cm × 0.5 cm) as anode and cathode, 13.3 mA/cm<sup>3</sup>, rt, 5.5 h. Yields were determined by HNMR with mesitylene as an internal standard. <sup>a</sup> yields of methyl 4-methylbenzoate.

#### 4.1.6 Screen of equiv of H<sub>2</sub>O

| H <sub>2</sub> O (equiv) | yield | H <sub>2</sub> O (equiv) | yield | H <sub>2</sub> O (equiv) | yield |
|--------------------------|-------|--------------------------|-------|--------------------------|-------|
| 2                        | 52%   | 20                       | 80%   | 200                      | 83%   |
| 5                        | 57%   | 50                       | 77%   |                          |       |
| 10                       | 72%   | 100                      | 80%   |                          |       |

Condition: **I** (0.3 mmol), <sup>n</sup>Bu<sub>4</sub>NOAc (0.3 mmol), MeCN (7 mL), carbon felt (1 cm × 1.5 cm × 0.5 cm) as anode and cathode, 13.3 mA/cm<sup>3</sup>, rt, 10 h. Yields were determined by HNMR with mesitylene as an internal standard.

#### 4.1.7 Optimization of the reaction of **I** with H<sub>2</sub>O as the hydrogen source in undivided cells.

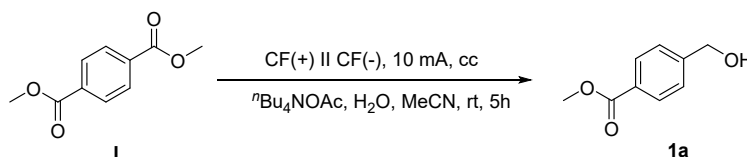

| Entry    | Deviation from optimized conditions <sup>a</sup>                    | Conv. <sup>b</sup> | Yield <sup>c</sup>          |
|----------|---------------------------------------------------------------------|--------------------|-----------------------------|
| <b>1</b> | <b>None</b>                                                         | <b>100%</b>        | <b>83%(78%<sup>d</sup>)</b> |
| 2        | No electric current                                                 | 0                  | 0                           |
| 3        | No H <sub>2</sub> O                                                 | 99%                | 15%                         |
| 4        | DMF instead of MeCN                                                 | 96%                | 50%                         |
| 5        | <i>i</i> PrOH instead of MeCN                                       | 97%                | 41%                         |
| 6        | THF instead of MeCN                                                 | 100%               | 65%                         |
| 7        | <i>i</i> PrOH instead of H <sub>2</sub> O                           | 98%                | 34%                         |
| 8        | Et <sub>3</sub> N instead of H <sub>2</sub> O                       | 98%                | 11%                         |
| 9        | <sup>n</sup> Bu <sub>4</sub> PF <sub>6</sub> supporting electrolyte | 94%                | 73%                         |
| 10       | LiPF <sub>6</sub> supporting electrolyte                            | 44%                | 0                           |
| 11       | Graphite felt instead of carbon felt                                | 86%                | 22%                         |

<sup>a</sup> Optimized condition: **I** (0.3 mmol), <sup>n</sup>Bu<sub>4</sub>NOAc (0.3 mmol), H<sub>2</sub>O/MeCN (1/6, 7 mL), carbon felt (1 cm × 1.5 cm × 0.5 cm) as anode and cathode, 13.3 mA/cm<sup>3</sup>, rt, 5 h. <sup>b</sup> Conversions were determined by HNMR with mesitylene as an internal standard. <sup>c</sup> Yields were determined HNMR with mesitylene as an internal standard. <sup>d</sup> Isolated yield.

## 4.2 Optimization of the electrochemical reduction of methyl benzoate with electron donating group.

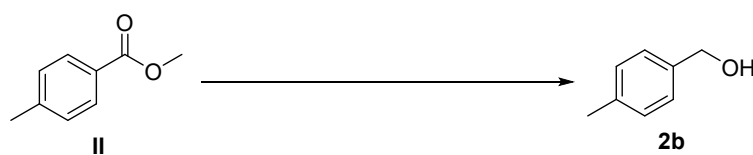

### 4.2.1 Screen of the electrolyte

| electrolyte                                   | yield | electrolyte                      | yield | electrolyte                                  | yield | electrolyte                                   | yield |
|-----------------------------------------------|-------|----------------------------------|-------|----------------------------------------------|-------|-----------------------------------------------|-------|
| <sup>n</sup> Bu <sub>4</sub> NPF <sub>6</sub> | 90%   | <sup>n</sup> Bu <sub>4</sub> OAc | 88%   | <sup>n</sup> Bu <sub>4</sub> BF <sub>4</sub> | 88%   | <sup>n</sup> Bu <sub>4</sub> ClO <sub>4</sub> | 87%   |
| <sup>n</sup> Bu <sub>4</sub> Cl               | 77%   | LiClO <sub>4</sub>               | 90%   | Mg(ClO <sub>4</sub> ) <sub>2</sub>           | 82%   |                                               |       |

Condition: **II** (0.3 mmol), electrolyte (0.3 mmol), H<sub>2</sub>O/MeCN = 1/6 (7 mL), Me<sub>2</sub>S (0.9 mmol), graphite felt (1 cm × 1.5 cm × 0.5 cm) as anode and cathode, 9.0 V  $V_{pp}$  of rAP, 2 Hz, rt, 10 h. Yields were determined by HNMR with mesitylene as an internal standard.

### 4.2.2 Screen of the equiv of electrolyte

| equiv | yield |
|-------|-------|
| 2.0   | 90%   |
| 1.0   | 90%   |
| 0.5   | 71%   |

Condition: **II** (0.3 mmol), <sup>n</sup>Bu<sub>4</sub>NPF<sub>6</sub> (0.3 mmol), H<sub>2</sub>O/MeCN = 1/6 (7 mL), Me<sub>2</sub>S (0.9 mmol), graphite felt (1 cm × 1.5 cm × 0.5 cm) as anode and cathode, 9.0 V  $V_{pp}$  of rAP, 2 Hz, rt, 10 h. Yields were determined by HNMR with mesitylene as an internal standard.

### 4.2.3 Screen of the solvent

| electrolyte | yield | electrolyte | yield | electrolyte | yield | electrolyte  | yield |
|-------------|-------|-------------|-------|-------------|-------|--------------|-------|
| MeCN        | 90%   | THF         | 28%   | DMF         | 40%   | DMSO         | 55%   |
| EtOH        | 26%   | Acetone     | 46%   | MeOH        | 49%   | THF/EtOH=1/1 | 43%   |

Condition: **II** (0.3 mmol), <sup>n</sup>Bu<sub>4</sub>NPF<sub>6</sub> (0.3 mmol), H<sub>2</sub>O/solvent = 1/6 (7 mL), Me<sub>2</sub>S (0.9 mmol), graphite felt (1 cm × 1.5 cm × 0.5 cm) as anode and cathode, 9.0 V  $V_{pp}$  of rAP, 2 Hz, rt, 10 h. Yields were determined by HNMR with mesitylene as an internal standard.

### 4.2.4 Screen of the additives

| additive          | yield | additive          | yield | additive      | yield | additive          | yield |
|-------------------|-------|-------------------|-------|---------------|-------|-------------------|-------|
| Me <sub>2</sub> S | 90%   | Ph <sub>2</sub> S | 75%   | 3, 5-diMePhSH | 0%    | Et <sub>3</sub> N | 3%    |
| Et <sub>2</sub> S | 82%   | Ph <sub>3</sub> P | 84%   | 1,3-Dithiane  | 70%   | DIEA              | 3%    |

Condition: **II** (0.3 mmol), <sup>n</sup>Bu<sub>4</sub>NPF<sub>6</sub> (0.3 mmol), H<sub>2</sub>O/MeCN = 1/6 (7 mL), additive (0.9 mmol), graphite felt (1 cm × 1.5 cm × 0.5 cm) as anode and cathode, 9.0 V  $V_{pp}$  of rAP, 2 Hz, rt, 10 h. Yields were determined by HNMR with mesitylene as an internal standard.

### 4.2.5 Screen of the equiv of Me<sub>2</sub>S.

| equiv | yield                  |
|-------|------------------------|
| 1.0   | 44% (46%) <sup>a</sup> |

|     |     |
|-----|-----|
| 2.0 | 90% |
| 3.0 | 90% |

Condition: **II** (0.3 mmol),  $n\text{Bu}_4\text{NPF}_6$  (0.3 mmol),  $\text{H}_2\text{O}/\text{MeCN} = 1/6$  (7 mL),  $\text{Me}_2\text{S}$ , graphite felt (1 cm  $\times$  1.5 cm  $\times$  0.5 cm) as anode and cathode, 9.0 V  $V_{\text{pp}}$  of rAP, 2 Hz, rt, 10 h. Yields were determined by HNMR with mesitylene as an internal standard. <sup>a</sup> SM recovered.

#### 4.2.6 Screen of the equiv of $\text{H}_2\text{O}$ .

| equiv | yield                   | equiv | yield | equiv | yield |
|-------|-------------------------|-------|-------|-------|-------|
| 2     | 1% (88%) <sup>a</sup>   | 20    | 86%   | 200   | 90%   |
| 5     | 1.5% (95%) <sup>a</sup> | 50    | 88%   |       |       |
| 10    | 86%                     | 100   | 87%   |       |       |

Condition: **II** (0.3 mmol),  $n\text{Bu}_4\text{NPF}_6$  (0.3 mmol), MeCN (6 mL),  $\text{Me}_2\text{S}$  (0.9 mmol), graphite felt (1 cm  $\times$  1.5 cm  $\times$  0.5 cm) as anode and cathode, 9.0 V  $V_{\text{pp}}$  of rAP, 2 Hz, rt, 10 h. Yields were determined by HNMR with mesitylene as an internal standard. <sup>a</sup> SM recovered.

#### 4.2.7 Screen of the voltage.

| Voltage (V $V_{\text{pp}}$ ) | yield                  |
|------------------------------|------------------------|
| 7.0                          | 37% (21%) <sup>a</sup> |
| 8.0                          | 87%                    |
| 9.0                          | 90%                    |
| 10.0 V                       | 70%                    |

Condition: **II** (0.3 mmol),  $n\text{Bu}_4\text{NPF}_6$  (0.3 mmol),  $\text{H}_2\text{O}/\text{MeCN} = 6/1$  (7 mL),  $\text{Me}_2\text{S}$  (0.9 mmol), graphite felt (1 cm  $\times$  1.5 cm  $\times$  0.5 cm) as anode and cathode, rAP, 2 Hz, rt, 10 h. Yields were determined by HNMR with mesitylene as an internal standard. <sup>a</sup> SM recovered.

#### 4.2.8 Screen of the frequency.

| frequency | yield                  | frequency | yield | frequency | yield |
|-----------|------------------------|-----------|-------|-----------|-------|
| 0.5 Hz    | 67%                    | 1 Hz      | 85%   | 2 Hz      | 90%   |
| 3 Hz      | 90%                    | 5 Hz      | 88%   | 10 Hz     | 81%   |
| 20 Hz     | 53% (15%) <sup>a</sup> |           |       |           |       |

Condition: **II** (0.3 mmol),  $n\text{Bu}_4\text{NPF}_6$  (0.3 mmol),  $\text{H}_2\text{O}/\text{MeCN} = 6/1$  (7 mL),  $\text{Me}_2\text{S}$  (0.9 mmol), graphite felt (1 cm  $\times$  1.5 cm  $\times$  0.5 cm) as anode and cathode, 9.0 V  $V_{\text{pp}}$  of rAP, rt, 10 h. Yields were determined by HNMR with mesitylene as an internal standard. <sup>a</sup> SM recovered.

#### 4.2.9 Control reaction.

| Entry                                       | yield                   |
|---------------------------------------------|-------------------------|
| No $\text{Me}_2\text{S}$                    | 8% (53%) <sup>a</sup>   |
| No $\text{H}_2\text{O}$                     | 2.5% (75%) <sup>a</sup> |
| No $\text{H}_2\text{O}/\text{Me}_2\text{S}$ | 0% (80%) <sup>a</sup>   |

Condition: **II** (0.3 mmol),  $n\text{Bu}_4\text{NPF}_6$  (0.3 mmol),  $\text{H}_2\text{O}/\text{MeCN} = 6/1$  (7 mL),  $\text{Me}_2\text{S}$  (0.9 mmol), graphite felt (1 cm  $\times$  1.5 cm  $\times$  0.5 cm) as anode and cathode, 9.0 V  $V_{\text{pp}}$  of rAP, rt, 10 h. Yields were determined by HNMR with mesitylene as an internal standard. <sup>a</sup> SM recovered.

#### 4.2.10 Optimization of the reduction of **II** with $\text{H}_2\text{O}$ as the hydrogen source in undivided cells.

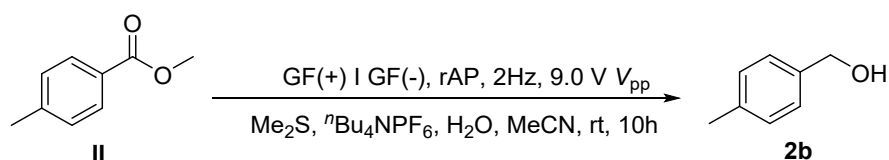

| Entry    | Deviation from optimized conditions <sup>a</sup>         | Conv. <sup>b</sup> | Yield <sup>c</sup>          |
|----------|----------------------------------------------------------|--------------------|-----------------------------|
| <b>1</b> | <b>None</b>                                              | <b>100%</b>        | <b>90%(86%<sup>d</sup>)</b> |
| 2        | No Me <sub>2</sub> S                                     | 47%                | 8%                          |
| 3        | No H <sub>2</sub> O                                      | 25%                | 2.5%                        |
| 4        | DMF instead of MeCN                                      | 97%                | 40%                         |
| 5        | EtOH instead of MeCN                                     | 72%                | 26%                         |
| 6        | THF instead of MeCN                                      | 82%                | 28%                         |
| 7        | Ph <sub>3</sub> P instead of Me <sub>2</sub> S           | 100%               | 84%                         |
| 8        | Et <sub>3</sub> N instead of Me <sub>2</sub> S           | 100%               | 3%                          |
| 9        | <sup>n</sup> Bu <sub>4</sub> NOAc supporting electrolyte | 100%               | 88%                         |
| 10       | LiClO <sub>4</sub> supporting electrolyte                | 100%               | 90%                         |
| 11       | 0.5 Hz                                                   | 100%               | 67%                         |
| 12       | 10 Hz                                                    | 99%                | 81%                         |
| 13       | 8.0 V <i>V</i> <sub>pp</sub>                             | 100                | 74%                         |
| 14       | Carbon felt instead of graphite felt                     | 86%                | 22%                         |
| 15       | Pb as cathode, 20 mA, cc                                 | 94%                | 8                           |
| 16       | DC, 4.5 V (C.V.)                                         | 100%               | 0%                          |

<sup>a</sup> Optimized condition: **II** (0.3 mmol), Me<sub>2</sub>S (0.9 mmol), <sup>n</sup>Bu<sub>4</sub>NPF<sub>6</sub> (0.3 mmol), H<sub>2</sub>O/MeCN (1/6, 7 mL), graphite felt (1 cm × 1.5 cm × 0.5 cm) as anode and cathode, 9.0 V *V*<sub>pp</sub> of rAP, 2 Hz, rt, 10 h. <sup>b</sup> Conversions were determined by HNMR with mesitylene as an internal standard. <sup>c</sup> Yields were determined HNMR with mesitylene as an internal standard. <sup>d</sup> Isolated yield.

#### 4.2.11 Measuring the consumption of electricity

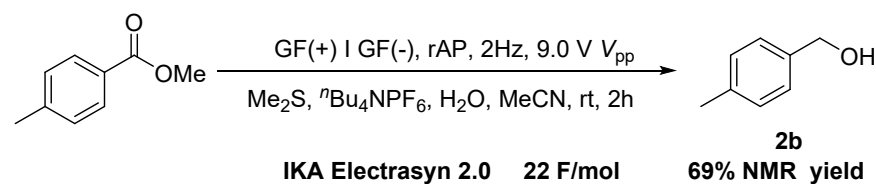

This reaction was conducted with IKA Electrasyn 2.0 with the function measuring the consumption of electricity of rAP.

## 5. Mechanism Study

### 5.1 Cyclic voltammetry experiments of reactants

#### 5.1.1. Cathodic reduction: MeCN + $n\text{Bu}_4\text{NOAc}$ (Blank-1)

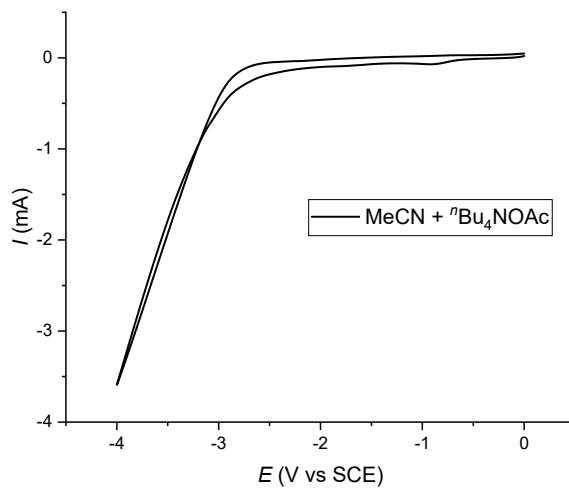

CV condition: glassy carbon working electrode, Pt wire counter electrode, SCE reference electrode, 0.1 V/S,  $n\text{Bu}_4\text{NOAc}$  (0.3 mmol), MeCN (6 mL).

#### 5.1.2. Cathodic reduction: Blank-1 + Dimethyl terephthalate (I)

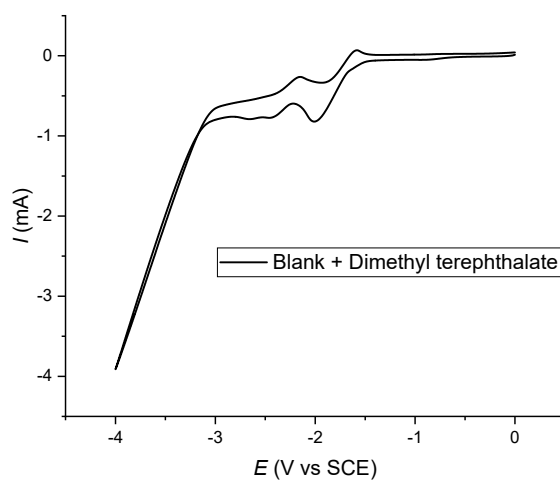

CV condition: glassy carbon working electrode, Pt wire counter electrode, SCE reference electrode, 0.1 V/S, I (0.3 mmol),  $n\text{Bu}_4\text{NOAc}$  (0.3 mmol), MeCN (6 mL).

### 5.1.3. Cathodic reduction: Blank-1 + Methyl 4-methylbenzoate (II)

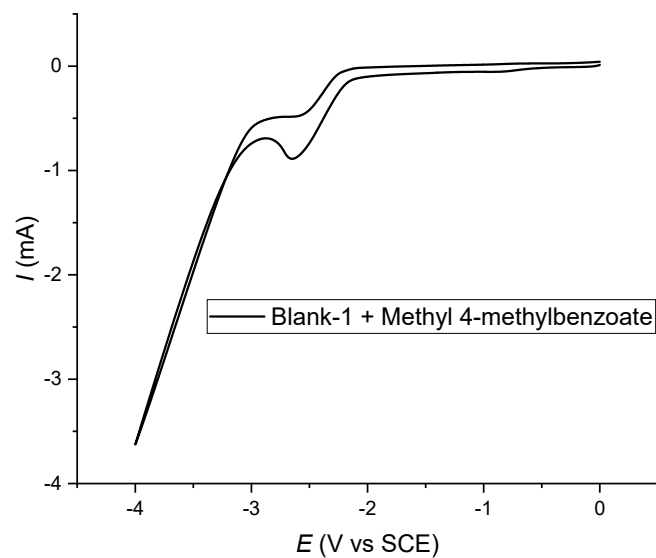

CV condition: glassy carbon working electrode, Pt wire counter electrode, SCE reference electrode, 0.1 V/S, II (0.3 mmol),  $n\text{Bu}_4\text{NOAc}$  (0.3 mmol), MeCN (6 mL).

### 5.1.4. Cathodic reduction: Blank-1 + H<sub>2</sub>O

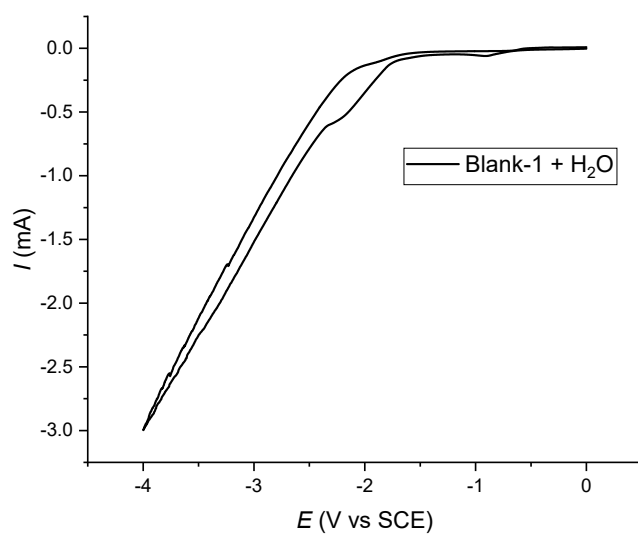

CV condition: glassy carbon working electrode, Pt wire counter electrode, SCE reference electrode, 0.1 V/S, H<sub>2</sub>O(0.1 ml),  $n\text{Bu}_4\text{NOAc}$  (0.3 mmol), MeCN (6 mL).

### 5.1.5. Cathodic reduction of I and H<sub>2</sub>O

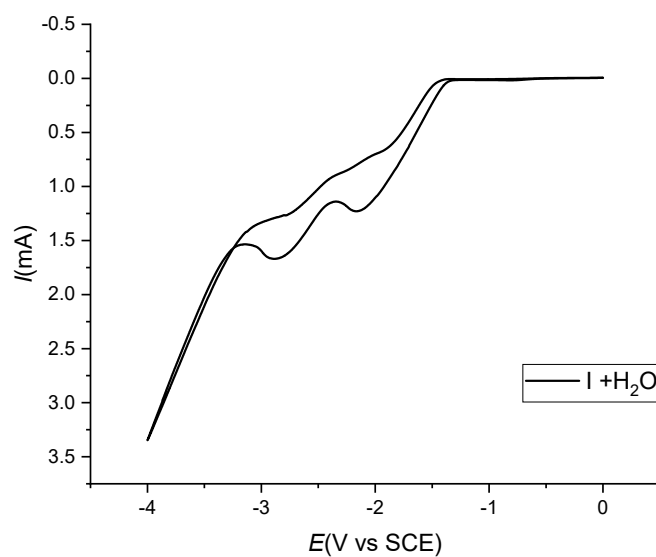

CV condition: glassy carbon working electrode, Pt wire counter electrode, SCE reference electrode, 0.1 V/S, I (0.3 mmol), H<sub>2</sub>O(0.1 ml), <sup>n</sup>Bu<sub>4</sub>NOAc (0.3 mmol), MeCN (6 mL).

### 5.1.6. Cathodic reduction of I/H<sub>2</sub>O/I and H<sub>2</sub>O

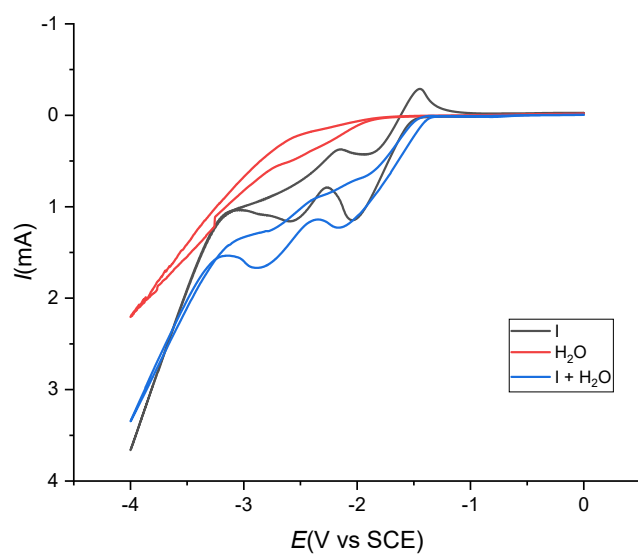

### 5.1.7. Cathodic reduction of I/H<sub>2</sub>O.

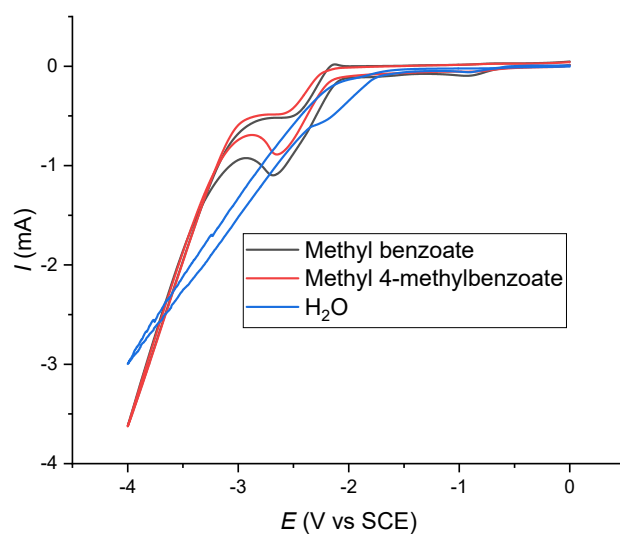

### 5.1.8. Anodic oxidation: MeCN + <sup>n</sup>Bu<sub>4</sub>NPF<sub>6</sub> (Blank-2)

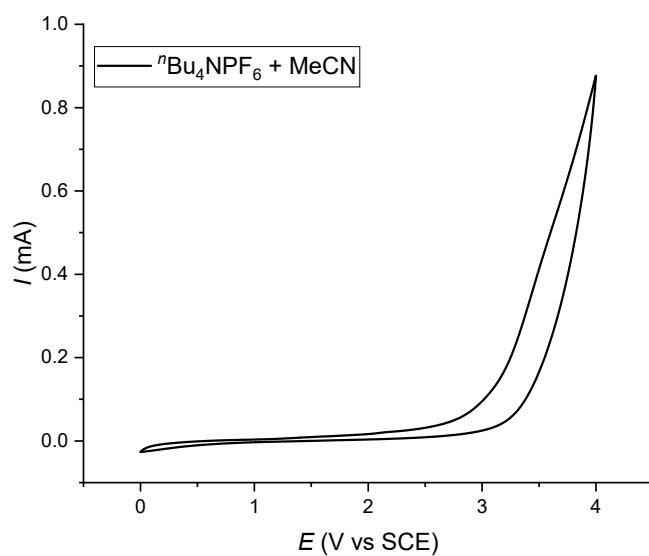

CV condition: glassy carbon working electrode, Pt wire counter electrode, SCE reference electrode, 0.1 V/S, <sup>n</sup>Bu<sub>4</sub>NPF<sub>6</sub> (0.3 mmol), MeCN (6 mL).



### 5.1.9. Anodic oxidation: 4-MeO<sub>2</sub>CPhCH<sub>2</sub>OH (1a) + Blank-2

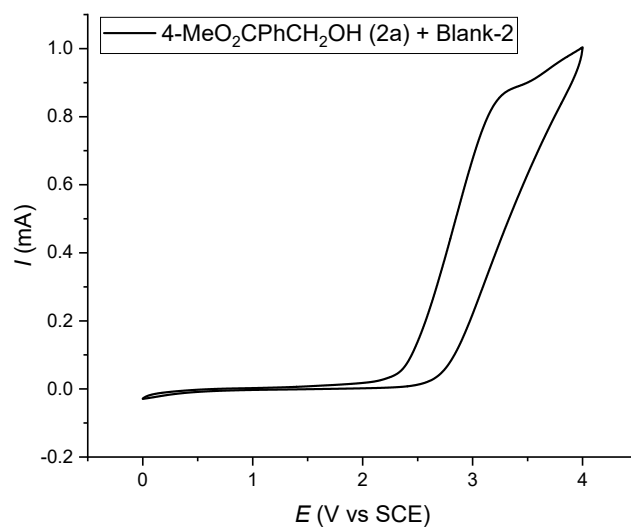

CV condition: glassy carbon working electrode, Pt wire counter electrode, SCE reference electrode, 0.1 V/S, **1** (0.3 mmol), <sup>n</sup>Bu<sub>4</sub>NPF<sub>6</sub> (0.3 mmol), MeCN (6 mL).

### 5.1.10. Anodic oxidation: 4-MeO<sub>2</sub>CPhCH<sub>2</sub>OH (1a) + <sup>n</sup>BuLi (0.5 eq) + Blank-2

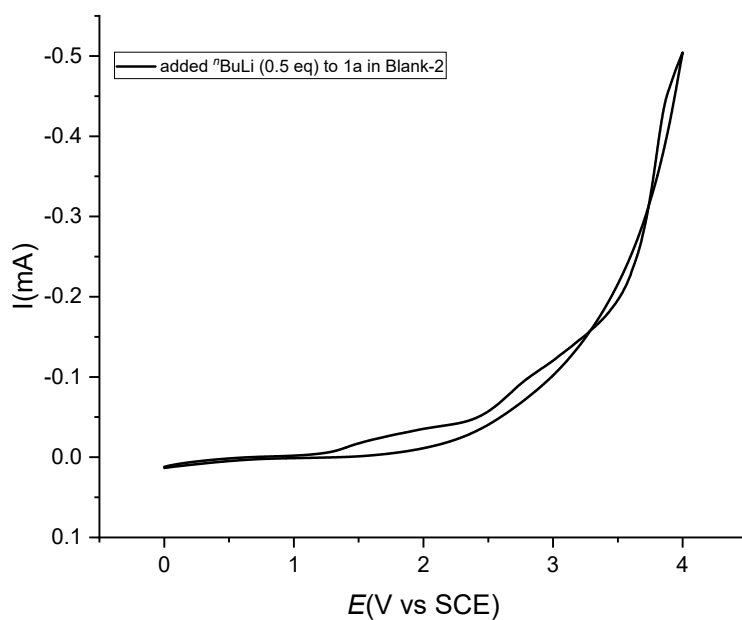

CV condition: glassy carbon working electrode, Pt wire counter electrode, SCE reference electrode, 0.1 V/S, **1** (0.3 mmol), <sup>n</sup>BuLi (0.15 mmol), <sup>n</sup>Bu<sub>4</sub>NPF<sub>6</sub> (0.3 mmol), MeCN (6 mL).

### 5.1.11. Anodic oxidation: $n\text{Bu}_4\text{NOAc} + \text{MeCN}$

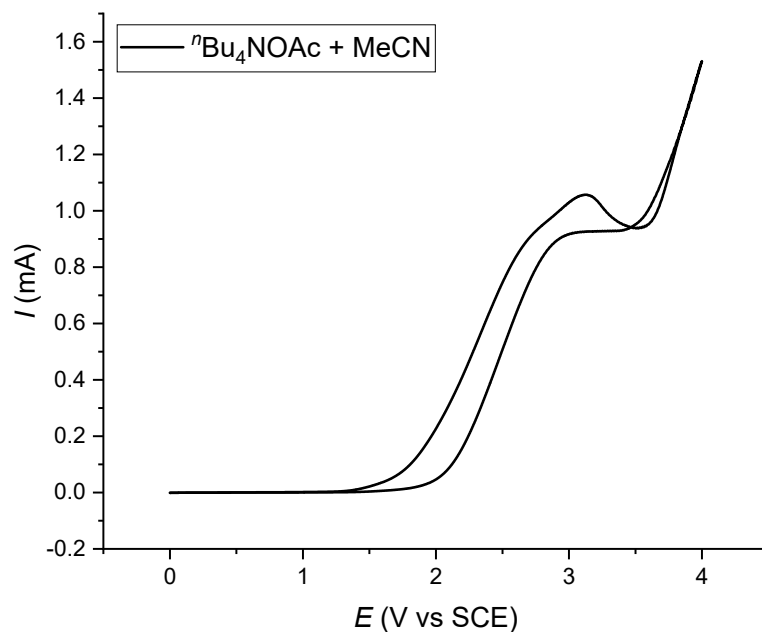

CV condition: glassy carbon working electrode, Pt wire counter electrode, SCE reference electrode, 0.1 V/S,  $n\text{Bu}_4\text{NOAc}$  (0.3 mmol),  $\text{MeCN}$  (6 mL).

### 5.1.12. Anodic oxidation: $n\text{Bu}_4\text{NOH} + \text{H}_2\text{O} + \text{MeCN}$

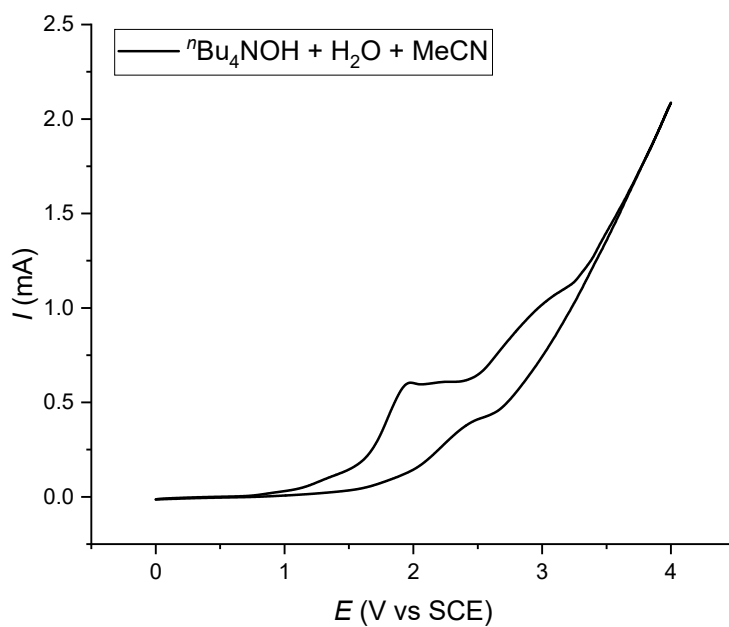

CV condition: glassy carbon working electrode, Pt wire counter electrode, SCE reference electrode, 0.1 V/S,  $n\text{Bu}_4\text{NOH}$  (40% in  $\text{H}_2\text{O}$ , 0.3 mmol),  $\text{MeCN}$  (6 mL).

### 5.1.13. Anodic oxidation: H<sub>2</sub>O + Blank-2

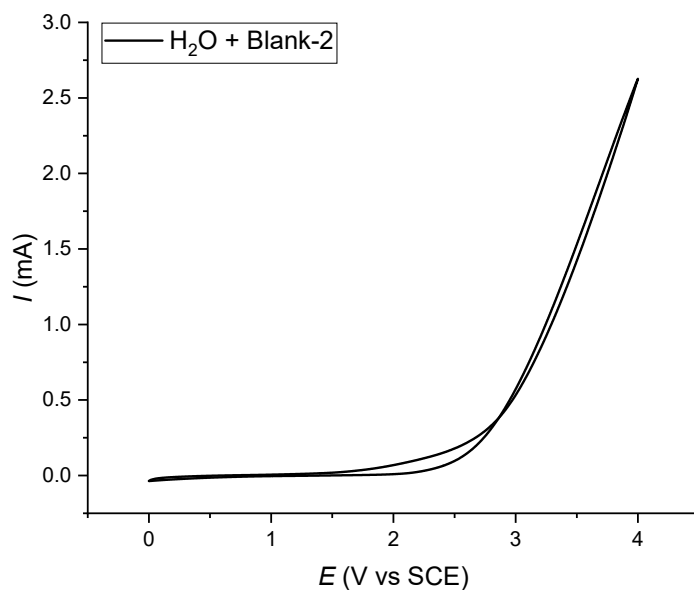

CV condition: glassy carbon working electrode, Pt wire counter electrode, SCE reference electrode, 0.1 V/S, H<sub>2</sub>O (1 mL), <sup>n</sup>Bu<sub>4</sub>NPF<sub>6</sub> (0.3 mmol), MeCN (6 mL).

### 5.1.14. Anodic oxidation: 4-MePhCH<sub>2</sub>OH (2b) + Blank-2

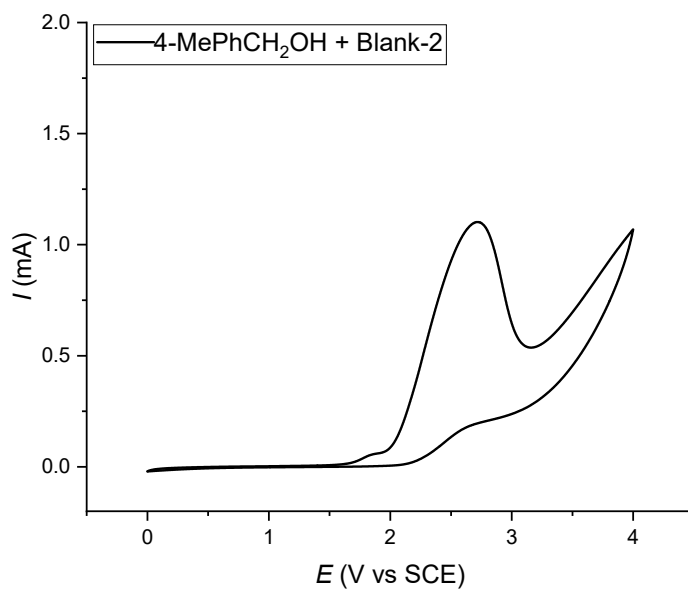

CV condition: glassy carbon working electrode, Pt wire counter electrode, SCE reference electrode, 0.1 V/S, **2b** (0.3 mmol), <sup>n</sup>Bu<sub>4</sub>NPF<sub>6</sub> (0.3 mmol), MeCN (6 mL).

**5.1.15. Anodic oxidation: 4-MePhCH<sub>2</sub>OH (2b) + <sup>n</sup>BuLi (0.5 eq) + Blank-2**

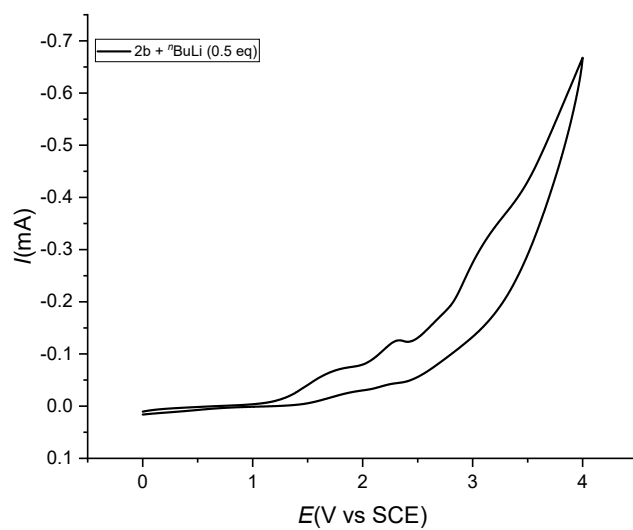

CV condition: glassy carbon working electrode, Pt wire counter electrode, SCE reference electrode, 0.1 V/S, **2b** (0.3 mmol), <sup>n</sup>BuLi (0.15 mmol), <sup>n</sup>Bu<sub>4</sub>NPF<sub>6</sub> (0.3 mmol), MeCN (6 mL).

**5.1.16. Anodic oxidation: Me<sub>2</sub>S + Blank-2**

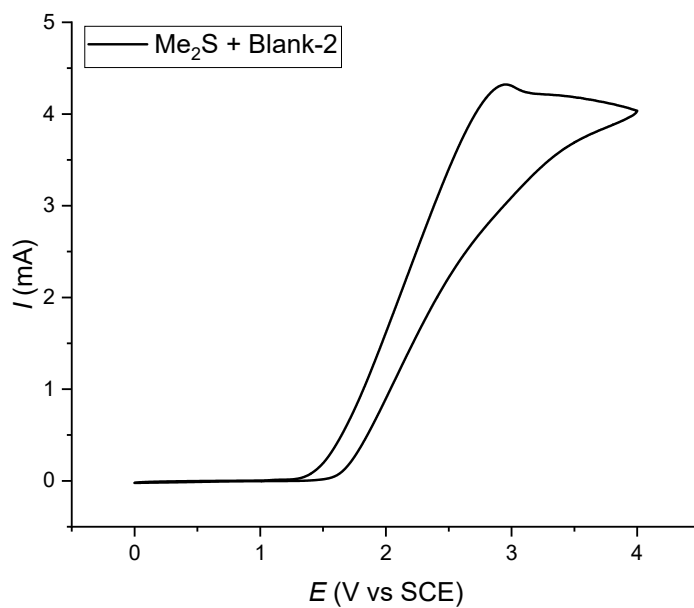

CV condition: glassy carbon working electrode, Pt wire counter electrode, SCE reference electrode, 0.1 V/S, Me<sub>2</sub>S (0.6 mmol), <sup>n</sup>Bu<sub>4</sub>NPF<sub>6</sub> (0.3 mmol), MeCN (6 mL).

### 5.1.17. Anodic oxidation of 4-MeO<sub>2</sub>CPhCH<sub>2</sub>OH (1a) and its Li<sup>+</sup> salt.

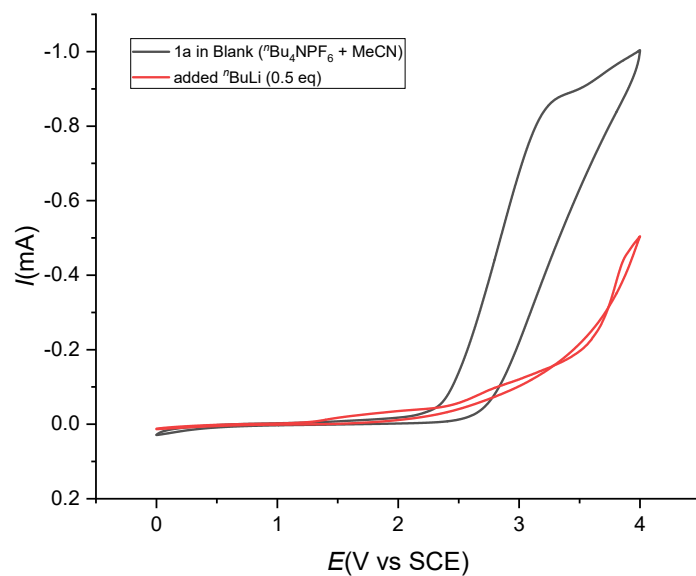

### 5.1.18. Anodic oxidation of 4-MePhCH<sub>2</sub>OH (2b) and its Li<sup>+</sup> salt.

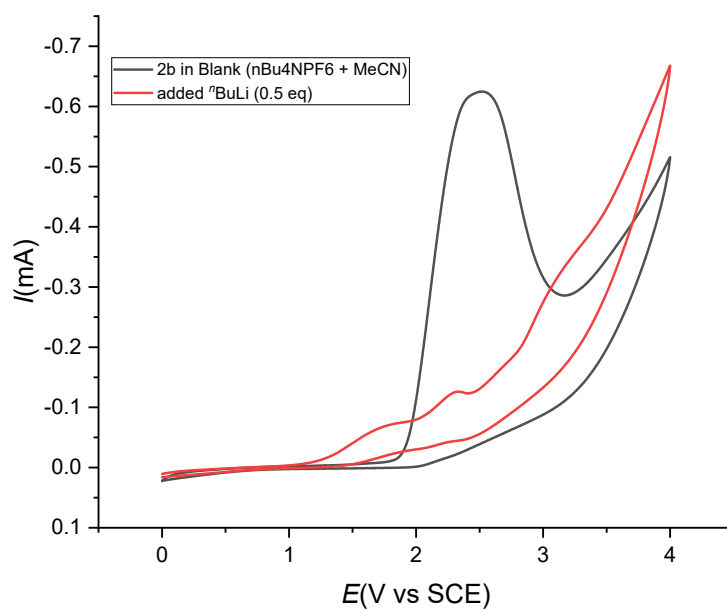

### 5.1.19. Anodic oxidation of 4-MeO<sub>2</sub>CPhCH<sub>2</sub>OH (1a) and reagents

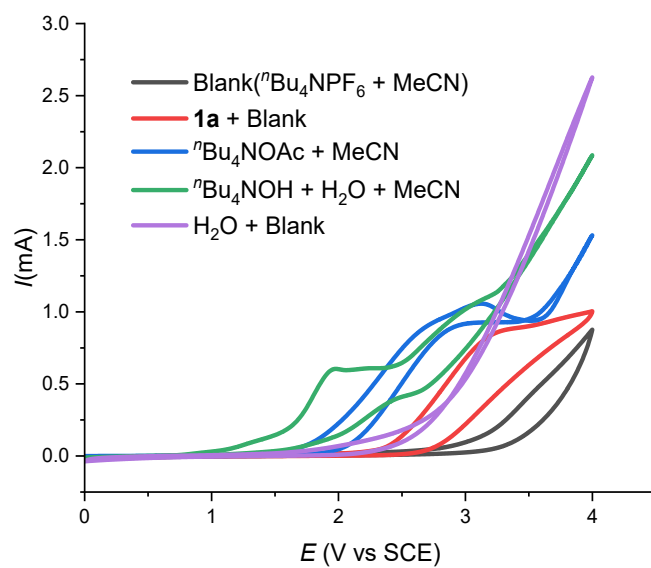

### 5.1.20 Anodic oxidation of 4-MePhCH<sub>2</sub>OH (2b) and Me<sub>2</sub>S.

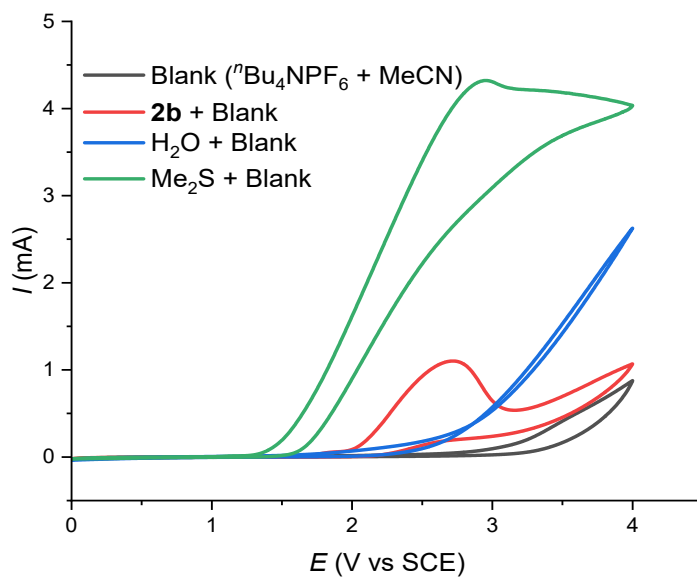

### 5.1.21 Cathodic reduction of Dimethyl terephthalate (I) and H<sub>2</sub>O in LiPF<sub>6</sub> + MeCN.

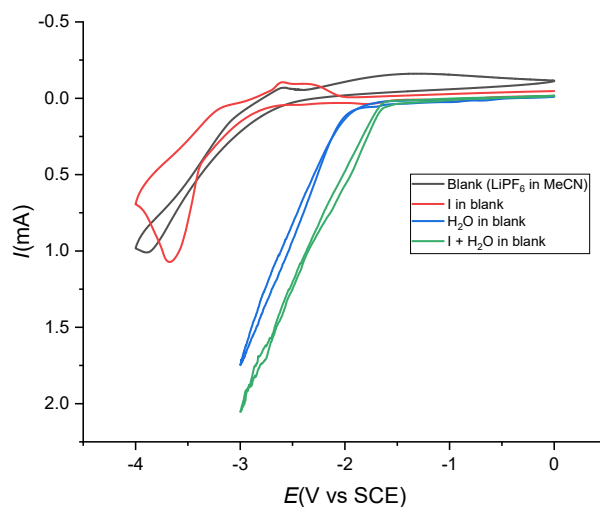

CV condition: glassy carbon working electrode, Pt wire counter electrode, SCE reference electrode, 0.1 V/S, I (0.3 mmol), LiPF<sub>6</sub> (0.3 mmol), H<sub>2</sub>O (1 ml), MeCN (6 mL).

### 5.2. Deuteration reaction with MeCN-*d*<sub>3</sub> as solvent.

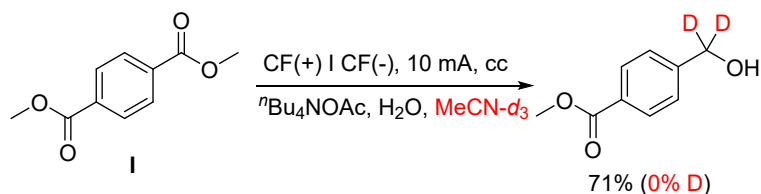

To a 10 mL two-necked heart-shaped flask was charged with the dimethyl terephthalate (I, 0.3 mmol), *n*-Bu<sub>4</sub>NOAc (90.4 mg, 0.3 mmol, 1.0 equiv), H<sub>2</sub>O (1 ml), MeCN-*d*<sub>3</sub> (6 ml) and a magnetic stir bar. The equipment was same as in **General procedure A**. The mixture was stirred under room temperature and 10 mA constant current electrolysis, and reacted until the substrate disappears. The reaction mixture was concentrated under the reduced pressure. The residue was purified by flash chromatography (PE/EtOAc = 4/1) to yield product with 0% deuteration in 71% yield (35.1 mg). <sup>1</sup>H NMR (400 MHz, chloroform-*d*) δ 8.00 (d, *J* = 7.9 Hz, 2H), 7.41 (d, *J* = 7.9 Hz, 2H), 4.74 (s, 2H), 3.90 (s, 3H), 2.46 (s, 1H).

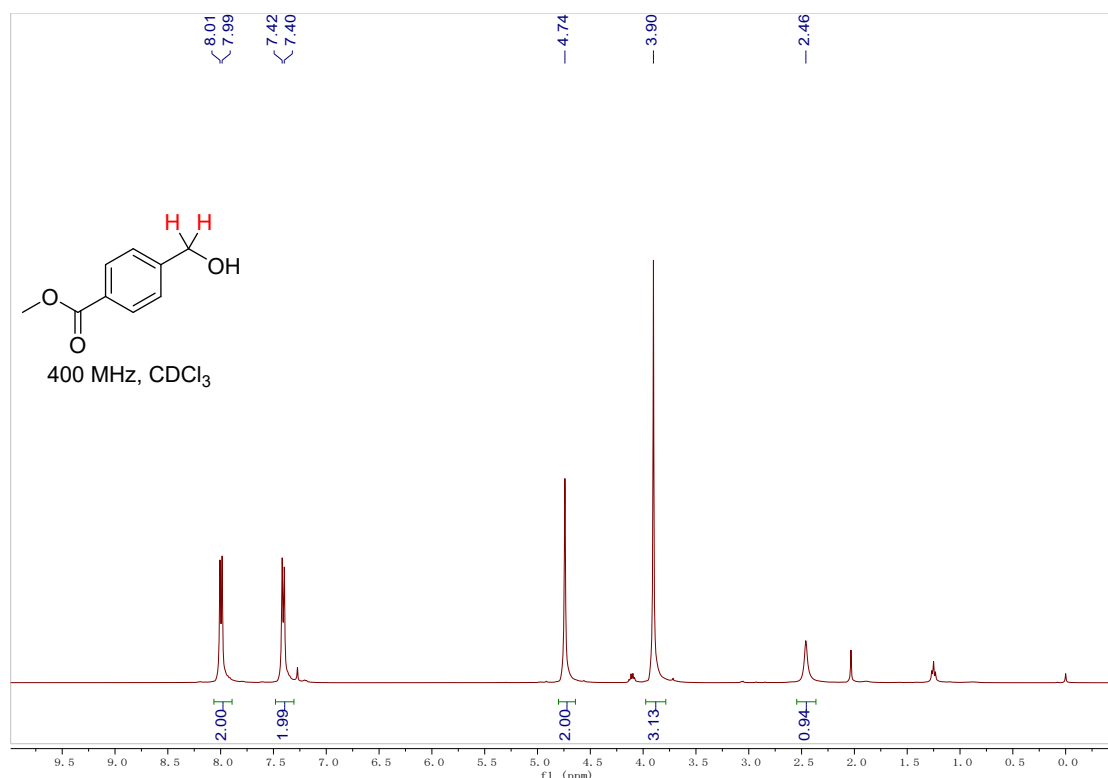

**Figure S7.**  $^1\text{H}$  NMR of the product in the deuteration reaction with  $\text{ACN-}d_3$  as solvent

### 5.3. Confirmation of byproduct structures

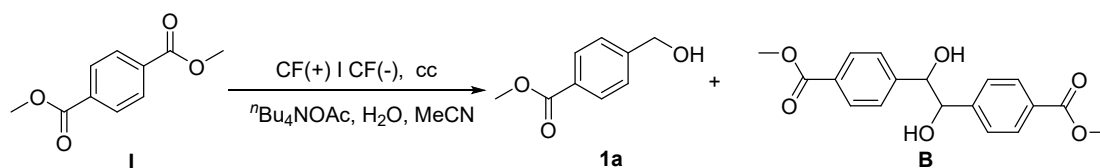

To a 100 mL glass beaker was charged with the dimethyl terephthalate (**I**, 1.94 g, 10 mmol),  $n\text{Bu}_4\text{NOAc}$  (1.21 g, 4 mmol, 0.4 equiv),  $\text{H}_2\text{O}$  (1.8 ml, 100 mmol, 10 equiv), MeCN (80 ml) and a magnetic stir bar. The bottle was equipped with a plastic cap, through which carbon felts (4 cm x 4 cm x 0.5 cm) as anode and cathode were installed. Two electrodes were attached to a titanium wire and separated with a Teflon film. A Teflon wire tied around two electrodes. The whole cell was an undivided cell. The mixture was stirred under room temperature and 100 mA constant current electrolysis, and reacted for 16 h. The reaction mixture was concentrated under the reduced pressure, and purified by flash chromatography (PE/EtOAc = 1/1) to afford the desired byproduct **B** as a white solid with 13% yield (210 mg, two isomers, ratio 5/8). Byproduct **B** has two steric isomers. **Isomer B-1**:  $^1\text{H}$  NMR (400 MHz,  $\text{DMSO-}d_6$ )  $\delta$  7.85 (d,  $J = 8.0$  Hz, 4H), 7.37 (d,  $J = 8.0$  Hz, 4H), 5.53 (s, 2H), 4.73 – 4.65 (m, 2H), 3.84 (s, 6H).  $^{13}\text{C}$  NMR (101 MHz,  $\text{DMSO-}d_6$ )  $\delta$  166.7, 148.9, 128.8, 128.6, 128.1, 76.9, 52.4. **Isomer B-2**:  $^1\text{H}$  NMR (400 MHz,  $\text{DMSO-}d_6$ )  $\delta$  7.78 (d,  $J = 8.0$  Hz, 4H), 7.25 (d,  $J = 8.1$  Hz, 4H), 5.63 (s, 2H), 4.77 (d,  $J = 3.2$  Hz, 2H), 3.82 (s, 6H).  $^{13}\text{C}$  NMR (101 MHz,  $\text{DMSO-}d_6$ )  $\delta$  166.7, 148.1, 128.6, 128.5, 127.8, 77.1, 52.4. HRMS  $m/z$  (ESI) called for  $\text{C}_{18}\text{H}_{18}\text{O}_6\text{Na}^+$  ( $M + \text{Na}$ ) $^+$  353.1001, found 353.0997.



#### 5.4. Benzaldehyde as substrate in standard condition.

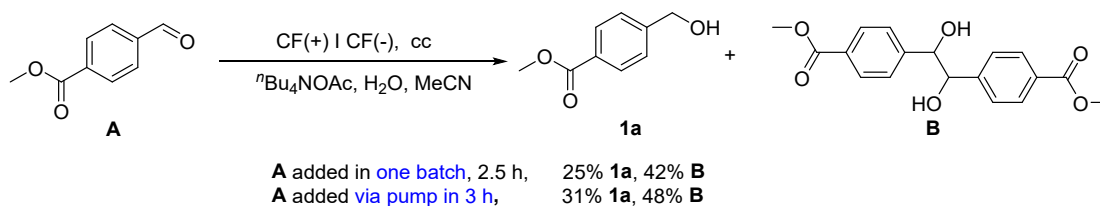

Method A: To a 10 mL two-necked heart-shaped flask was charged with methyl 4-formylbenzoate (**A**, 39.3 mg, 0.3 mmol), <sup>t</sup>Bu<sub>4</sub>NOAc (90.4 mg, 0.3 mmol, 1.0 equiv), H<sub>2</sub>O (1 ml), MeCN (6 ml) and a magnetic stir bar. The equipment was same as **General procedure A**. The mixture stirred under room temperature and 10 mA constant current electrolysis, and reacted until the substrate disappears (2.5 h). The reaction mixture was concentrated under the reduced pressure. <sup>1</sup>H NMR analysis of the crude reaction mixture showed 25% desired product **1a** and 42% byproduct **B**.

Method B: To a 10 mL two-necked heart-shaped flask was charged with <sup>t</sup>Bu<sub>4</sub>NOAc (90.4 mg, 0.3 mmol), H<sub>2</sub>O (1 ml), MeCN (5 ml) and a magnetic stir bar. The equipment was same as in **General procedure A**. The mixture was stirred under room temperature and 10 mA constant current electrolysis. Methyl 4-formylbenzoate (**A**, 39.3 mg, 0.3 mmol) in MeCN (1 mL) was injected into the mixture by a pump in 3 h. The reaction mixture was concentrated under the reduced pressure. <sup>1</sup>H NMR spectroscopic analysis of the crude reaction mixture showed 31% desired product **1a** and 48% byproduct **B**.

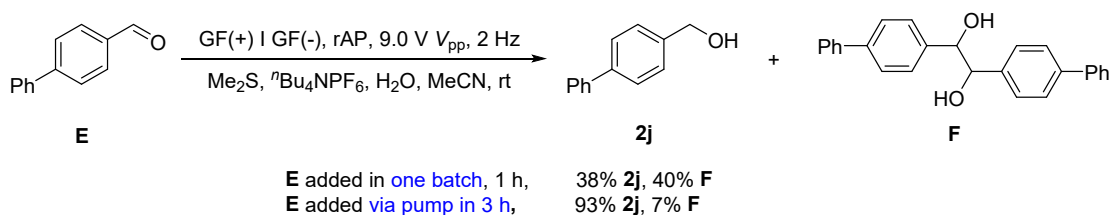

Method A: To a 10 mL two-necked heart-shaped flask was charged with [1,1'-biphenyl]-4-carbaldehyde (**E**, 0.3 mmol), Me<sub>2</sub>S (55.8 mg, 0.9 mmol, 3.0 equiv), <sup>t</sup>Bu<sub>4</sub>NPF<sub>6</sub> (116.2 mg, 0.3 mmol, 1.0 equiv), H<sub>2</sub>O (1 mL), MeCN (6 ml) and a magnetic stir bar. The equipment was same as is **General procedure B**. The mixture was stirred under room temperature and 9.0 V *V*<sub>pp</sub> of rAP (detected by oscilloscope, set 0.9 V on signal generator, peak to peak, 0.45 V from the offset, alternating frequency: 2 Hz, the current was around 60 mA) and reacted until the substrate disappears (1h). The reaction mixture was concentrated under the reduced pressure. <sup>1</sup>H NMR spectroscopic analysis of the crude reaction mixture with mesitylene as an internal standard found 38% desired product **2j** and 40% byproduct **F**.

Method B: To a 10 mL two-necked heart-shaped flask was charged with Me<sub>2</sub>S (55.8 mg, 0.9 mmol, 3.0 equiv), <sup>t</sup>Bu<sub>4</sub>NPF<sub>6</sub> (116.2 mg, 0.3 mmol, 1.0 equiv), H<sub>2</sub>O (1 mL), MeCN (5 ml) and a magnetic stir bar. The equipment was same as in **General procedure B**. The mixture was stirred under room temperature and 9.0 V *V*<sub>pp</sub> of rAP (detected by oscilloscope, set 0.9 V on signal generator, peak to peak, 0.45 V from the offset, alternating frequency: 2 Hz, the current was around 60 mA). The [1,1'-biphenyl]-4-carbaldehyde (**E**, 0.3 mmol) in MeCN (2 mL) was injected into the mixture by a pump in 3 h. The reaction mixture was concentrated under the reduced pressure. <sup>1</sup>H NMR spectroscopic analysis of the crude reaction mixture with mesitylene as an internal standard found 93% desired product **2j** and 7% byproduct **F**.

### 5.5. Electron paramagnetic resonance (EPR) experiments.

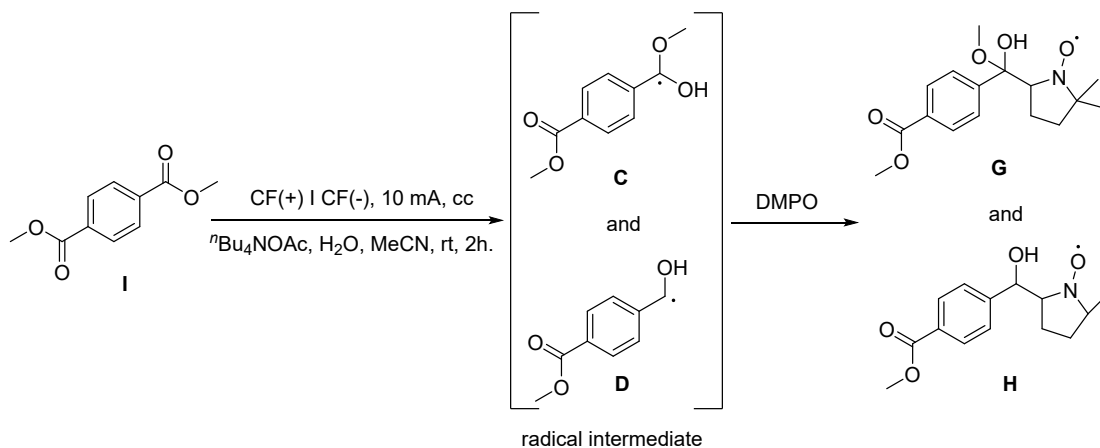

To a 10 mL two-necked heart-shaped flask was charged with the dimethyl terephthalate (**I**, 0.3 mmol),  ${}^t\text{Bu}_4\text{NOAc}$  (90.4 mg, 0.3 mmol, 1.0 equiv),  $\text{H}_2\text{O}$  (1 ml),  $\text{MeCN}$  (6 ml). The equipment was same as in **General procedure A**. The mixture was stirred under room temperature and 10 mA constant current electrolysis and reacted for 2 hours. The 100  $\mu\text{L}$  of the reaction mixture was sampled quickly and injected to 17 mg 5, 5-dimethyl-1-pyrroline N-Oxide (DMPO) in a small tube and analyzed by EPR. (Control experiment without dimethyl terephthalate (**I**)).

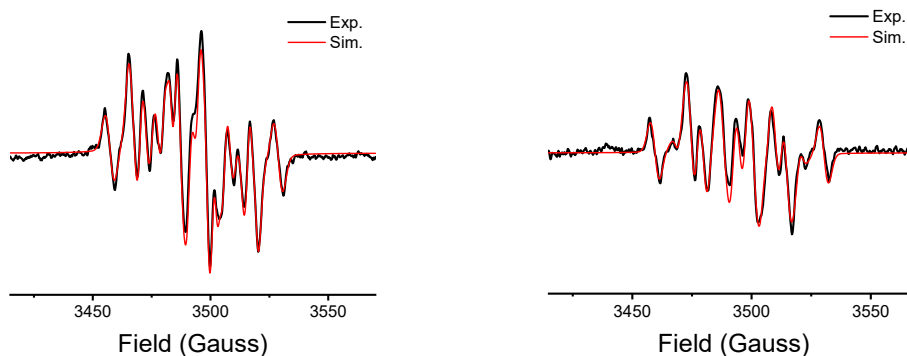

**Figure S8.** EPR spectra.

Left: with dimethyl terephthalate (**I**); Right: without dimethyl terephthalate (**I**)

Component 1:  $g = 2.003$ ,  $A_{\text{N}} = 15.03\text{G}$ ,  $A_{\text{H}\beta} = 23.21\text{G}$

Component 2:  $g = 2.003$ ,  $A_{\text{N}} = 15.20\text{G}$ ,  $A_{\text{H}\beta} = 19.16\text{G}$

Component 3:  $g = 2.003$ ,  $A_{\text{N}} = 15.32\text{G}$ ,  $A_{\text{H}\beta} = 20.34\text{G}$

Component 4:  $g = 2.003$ ,  $A_{\text{N}} = 13.39\text{G}$ ,  $A_{\text{H}\beta} = 13.39\text{G}$

Components 3 and 4 both exist in two spectrums, we proposed that these radical signals belong to species J (Component 3) and K (Component 4) which formed from  $\text{H}\cdot$  and  $\text{OH}\cdot$  trapped by DMPO.

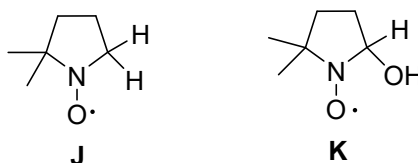

Component 1 and 2, we proposed that these radical signals belong to species C and D, but can't assign exactly.

### 5.6. Free radical trapping experiments.

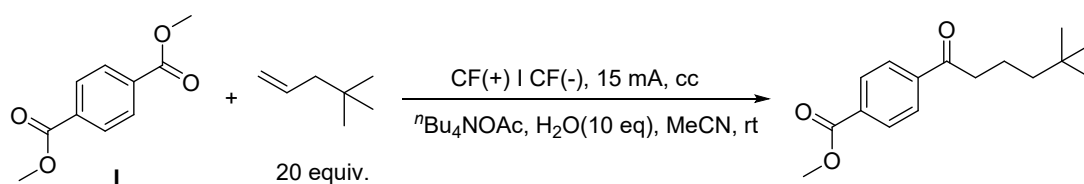

To a 10 mL two-necked heart-shaped flask was charged with the dimethyl terephthalate (**I**, 0.3 mmol),  $n\text{Bu}_4\text{NOAc}$  (90.4 mg, 0.3 mmol, 1.0 equiv),  $\text{H}_2\text{O}$  (54 mg, 3 mmol, 10 equiv), 4,4-dimethylpent-1-ene (589 mg, 6 mmol, 20 equiv), MeCN (6 ml). The equipment was same as in **General procedure A**. The mixture was stirred under room temperature and 15 mA constant current electrolysis and reacted for 5 hours. The reaction mixture was concentrated under the reduced pressure. The residue was purified by flash chromatography (PE/EtOAc = 10/1) to afford methyl 4-(5,5-dimethylhexanoyl)benzoate as a colorless oil in 4% yield (3.1 mg).  $^1\text{H}$  NMR (400 MHz, chloroform-*d*)  $\delta$  7.96 (d,  $J$  = 8.4 Hz, 2H), 7.25 (d,  $J$  = 8.4 Hz, 2H), 3.91 (s, 3H), 2.71 – 2.58 (m, 2H), 2.50 (t,  $J$  = 7.1 Hz, 2H), 1.97 – 1.84 (m, 2H), 1.12 (s, 9H).  $^{13}\text{C}$  NMR (151 MHz, chloroform-*d*)  $\delta$  215.7, 167.2, 147.4, 129.7, 128.5, 127.8, 52.1, 35.4, 35.1, 29.7, 26.4, 24.9. HRMS  $m/z$  (ESI) called for  $\text{C}_{16}\text{H}_{23}\text{O}_3^+$  ( $\text{M} + \text{H}$ ) $^+$  263.1647, found 263.1645.

### 5.7. Electrochemical reduction of phenyl 4-cyanobenzoate to detect reductive products.

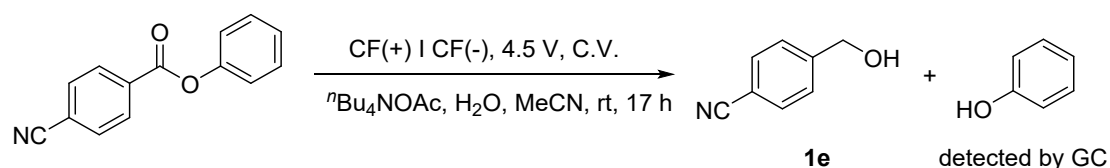

To a 10 mL two-necked heart-shaped flask was charged with phenyl 4-cyanobenzoate (66.9 mg, 0.3 mmol),  $n\text{Bu}_4\text{NOAc}$  (90.4 mg, 0.3 mmol, 1.0 equiv),  $\text{H}_2\text{O}$  (1 ml), MeCN (6 ml) and a magnetic stir bar. The equipment was same as in **General procedure A**. The mixture was stirred under room temperature and 4.5 V constant voltage electrolysis and reacted until the substrates disappear (17 h). The reaction mixture was concentrated under the reduced pressure.  $^1\text{H}$  NMR spectroscopic analysis of the crude reaction mixture with mesitylene as an internal standard found 54% desired product **1e**. GC analysis of the crude reaction mixture found that phenol is another product.

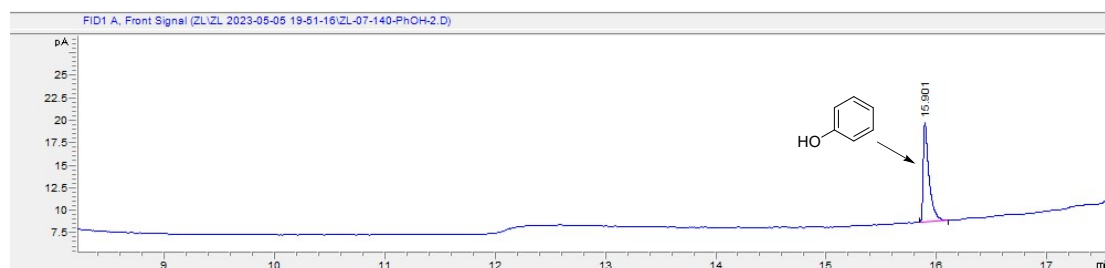

**Figure S9.** Standard sample of phenol

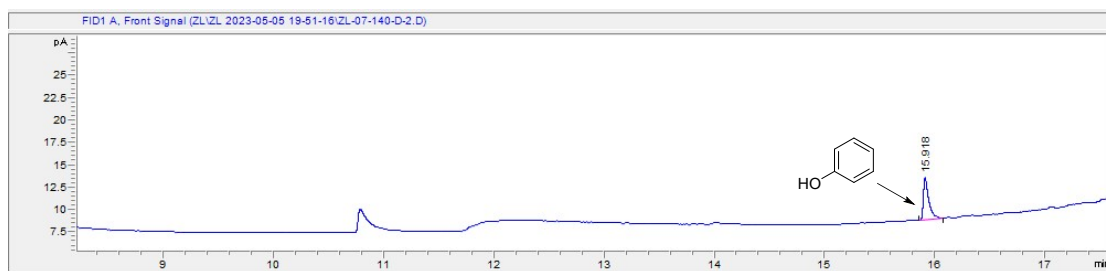

**Figure S10.** Sample of reaction mixture with **104** as substrate

### 5.8. Oxygen detection.

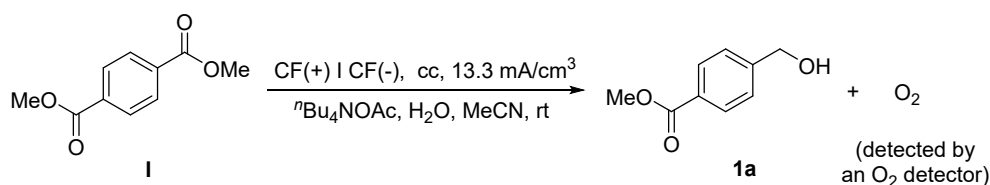

The experimental facility was set up as following picture (Fig. S11). To a 15 mL Schlenk bottle was charged with dimethyl terephthalate (116 mg, 0.6 mmol), *n*Bu<sub>4</sub>NOAc (90.4 mg, 0.3 mmol, 0.5 equiv), H<sub>2</sub>O (1.5 ml), MeCN (9 ml) and a magnetic stir bar. The bottle was equipped with a rubber stopper, through which carbon felts (1.5 cm x 2 cm x 0.5 cm) as anode and cathode were installed. Two electrodes were attached to a titanium wire and separated with a Teflon film. A Teflon wire tied around two electrodes. The whole cell was an undivided cell. Ar flow was introduced to the anode carbon felt through a long needle. The Schlenk bottle was connected with an O<sub>2</sub> detector (AS8901) by rubber hose. The system was flushed by Ar flow for 30 mins (make sure the Ar flow is constant) until the oxygen detector showed a steady value at about 2.5. The mixture was stirred under room temperature and 20 mA constant current electrolysis and reacted for 4.5 h. During the reaction, the electricity turned on for 1 h then turned off for 10 min, circularly. The oxygen content was detected every 10 minutes (electricity on) / 2 min (electricity off). After the reaction was complete, the mixture was concentrated under the reduced pressure. <sup>1</sup>H NMR spectroscopic analysis of the crude reaction mixture with mesitylene as an internal standard found the NMR yield was 83%.

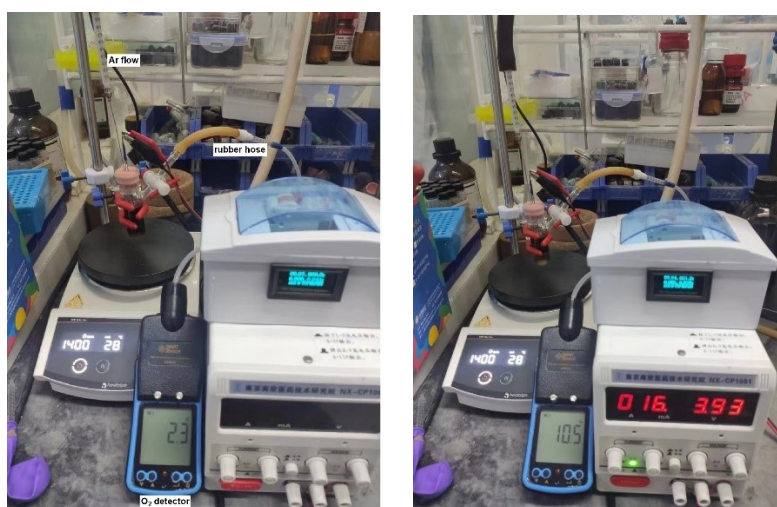

**Figure S11.** The experimental facility. Left: electricity off; Right: electricity on

**The oxygen content / time:**

| electricity | Time (min) | O <sub>2</sub> cont. (vol%) | electricity | Time (min) | O <sub>2</sub> cont. (vol%) |
|-------------|------------|-----------------------------|-------------|------------|-----------------------------|
| off         | 10         | 2.5                         | off         | 168        | 2.4                         |
|             | 20         | 2.5                         |             | 170        | 2.3                         |
|             | 30         | 2.5                         |             | on         | 180                         |
| on          | 40         | 10.0                        | 190         |            | 9.6                         |
|             | 50         | 11.4                        | 200         |            | 10.1                        |
|             | 60         | 11.3                        | 210         |            | 11.1                        |
|             | 70         | 11.2                        | 220         |            | 10.8                        |
|             | 80         | 10.9                        | 230         |            | 11.5                        |
| off         | 90         | 10.3                        | off         | 232        | 6.8                         |
|             | 92         | 2.7                         |             | 234        | 3.6                         |
|             | 94         | 2.5                         |             | 236        | 3.7                         |
|             | 96         | 2.5                         |             | 238        | 3.6                         |
|             | 98         | 2.4                         |             | 240        | 3.6                         |
| on          | 100        | 2.3                         | on          | 250        | 9.3                         |
|             | 110        | 10.6                        |             | 260        | 10.7                        |
|             | 120        | 10.2                        |             | 270        | 11.5                        |
|             | 130        | 11.0                        |             | 280        | 11.5                        |
|             | 140        | 11.0                        |             | 290        | 12.6                        |
|             | 150        | 11.5                        |             | 300        | 12.5                        |
| off         | 160        | 12.4                        | off         | 302        | 7.7                         |
|             | 162        | 4.3                         |             | 304        | 5.7                         |
|             | 164        | 2.8                         |             | 306        | 4.8                         |
|             | 166        | 2.5                         |             | 308        | 5.1                         |

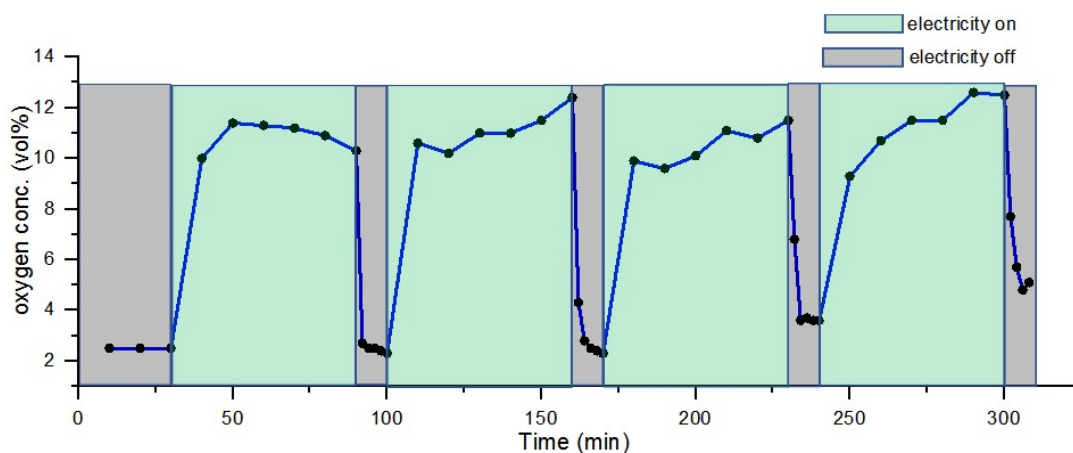

**Figure S12.** Oxygen detection

### 5.9. Observation of DMSO during the rAP reaction.

During entry 1 (Table 2), we observed the formation of DMSO.

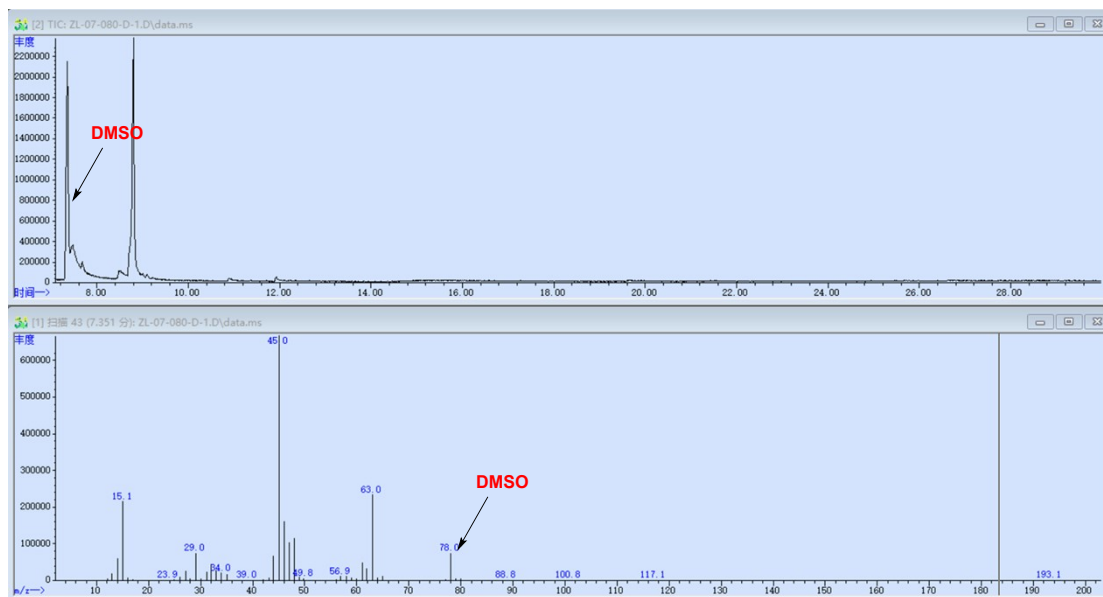

Figure S13. The GCMS spectra of entry 1 (Table 2)

### 5.10. Experiments for kinetic study without / with tertiary butanol (<sup>t</sup>BuOH).

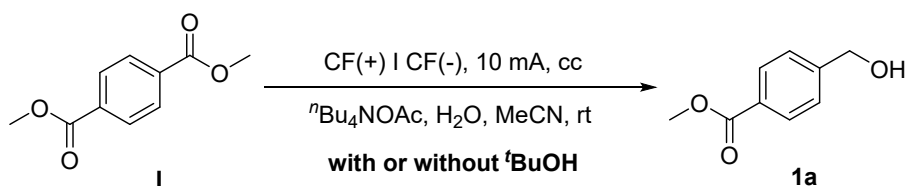

To two same 10 mL two-necked heart-shaped flask was charged with the dimethyl terephthalate (**I**, 0.3 mmol), <sup>t</sup>Bu<sub>4</sub>NOAc (90.4 mg, 0.3 mmol, 1.0 equiv), H<sub>2</sub>O (1 ml), MeCN (6 ml), adiponitrile (34.1 μL, 0.3 mmol, as an internal standard) and without or with 200 μL <sup>t</sup>BuOH (7 equiv), respectively. The equipment was same as in **General procedure A**. The mixture was stirred under room temperature and 10 mA constant current electrolysis. A 50 μL of reaction mixture was taken and analyzed by GC every 30 minutes.

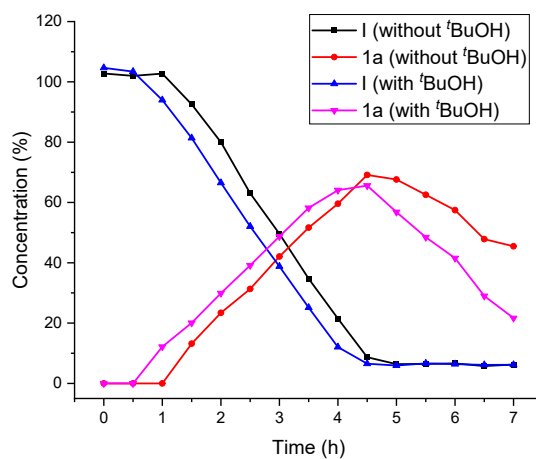

**Figure S14.** Experiments for kinetic study of **I** without / with tertiary butanol.

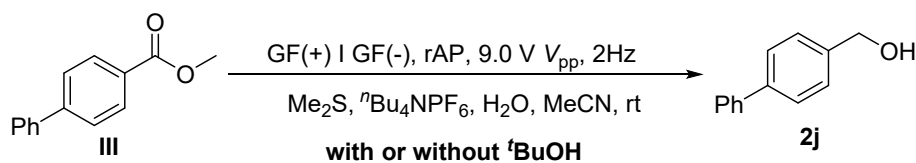

To two same 10 mL two-necked heart-shaped flask was charged with methyl 4-phenylbenzoate (**III**, 0.3 mmol), Me<sub>2</sub>S (55.8 mg, 0.9 mmol, 3.0 equiv), <sup>n</sup>Bu<sub>4</sub>NPF<sub>6</sub> (116.2 mg, 0.3 mmol, 1.0 equiv), H<sub>2</sub>O (1 ml), MeCN (6 ml), adiponitrile (34.1 μL, 0.3 mmol, as an internal standard) and without / with 200 μL <sup>t</sup>BuOH (7 equiv), respectively. The equipment was same as in **General procedure B**. The mixture was stirred under room temperature and 9.0 V *V*<sub>pp</sub> of rAP (detected by oscilloscope, set 0.9 V on signal generator, peak to peak, 0.45 V from the offset, alternating frequency: 2 Hz). A 50 μL of reaction mixture was taken and analyzed by GC every 10 minutes.

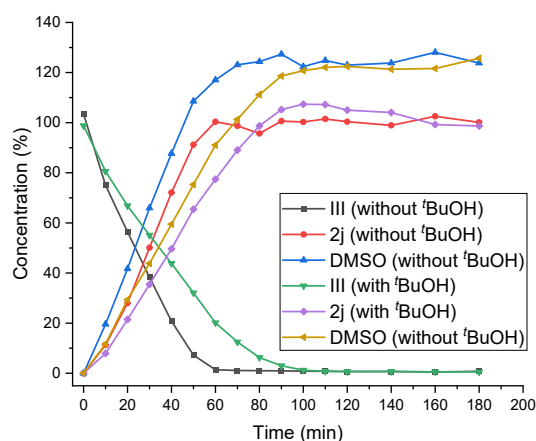

**Figure S15.** Experiments for kinetic study of **III** without / with tertiary butanol

### 5.11. Experiments with Et<sub>3</sub>N.

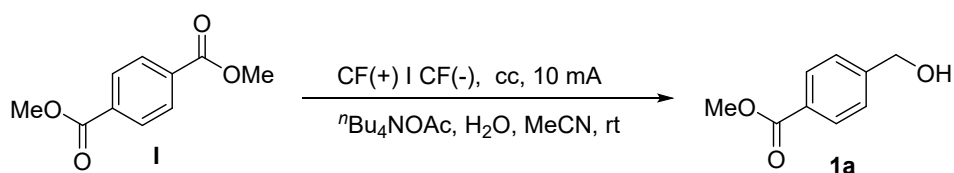

|                                                                            |     | conv. | yield |
|----------------------------------------------------------------------------|-----|-------|-------|
| Et <sub>3</sub> N (6 eq) instead of H <sub>2</sub> O                       | 5 h | 98%   | 11%   |
| Et <sub>3</sub> N (6 eq) + Pivalic acid (6 eq) instead of H <sub>2</sub> O | 8 h | 100%  | 70%   |

To a 10 mL two-necked heart-shaped flask was charged with the dimethyl terephthalate (**I**, 0.3 mmol), <sup>n</sup>Bu<sub>4</sub>NOAc (90.4 mg, 0.3 mmol, 1.0 equiv), Et<sub>3</sub>N (181.8 mg, 1.8 mmol, 6.0 equiv), pivalic acid (183.8 mg, 1.8 mmol, 6.0 equiv) or not, MeCN (6 ml). The equipment was same as in **General procedure A**. The mixture was stirred under room temperature and 10 mA constant current electrolysis until the reaction were complete. The yield was measured by <sup>1</sup>H NMR analysis of crude reaction mixture with mesitylene as an internal standard.

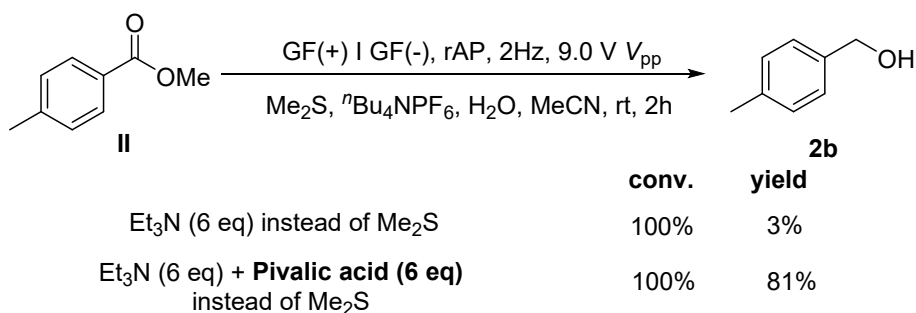

To a 10 mL two-necked heart-shaped flask was charged with methyl 4-methylbenzoate (II, 0.3 mmol), Et<sub>3</sub>N (181.8 mg, 1.8 mmol, 6.0 equiv), pivalic acid (183.8 mg, 1.8 mmol, 6.0 equiv) or not, <sup>t</sup>Bu<sub>4</sub>NPF<sub>6</sub> (116.2 mg, 0.3 mmol, 1.0 equiv), H<sub>2</sub>O (1 ml), MeCN (6 ml) and a magnetic stir bar. The equipment was same as in **General procedure B**. The mixture was stirred under room temperature and 9.0 V *V*<sub>pp</sub> of rAP (detected by oscilloscope, set 0.9 V on signal generator, peak to peak, 0.45 V from the offset, alternating frequency: 2 Hz, the current was around 60 mA), and reacted until substrates disappear (about 2 hours). The reaction mixture was concentrated under the reduced pressure. The yield was measured by <sup>1</sup>H NMR analysis of crude reaction mixture with mesitylene as an internal standard.

### 5.12. Stability experiment of 4-methylbenzyl alcohol (2b).

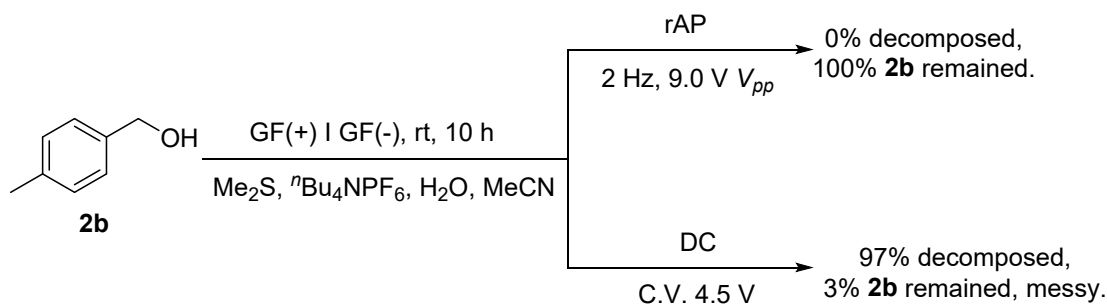

To a 10 mL two-necked heart-shaped flask was charged with 4-methylbenzyl alcohol (2b, 0.3 mmol), Me<sub>2</sub>S (55.8 mg, 0.9 mmol, 3.0 equiv), <sup>t</sup>Bu<sub>4</sub>NPF<sub>6</sub> (116.2 mg, 0.3 mmol, 1.0 equiv), H<sub>2</sub>O (1 ml), MeCN (6 ml) and a magnetic stir bar. The equipment was same as in **General procedure B**. For DC condition, the mixture was stirred under room temperature and 4.5 V constant voltage electrolysis for 10 hours. For rAP condition, the mixture was stirred under room temperature and 9.0 V *V*<sub>pp</sub> of rAP (detected by oscilloscope, set 0.9 V on signal generator, peak to peak, 0.45 V from the offset, alternating frequency: 2 Hz) for 10 hours. The yield was measured by <sup>1</sup>H NMR analysis of crude reaction mixture with mesitylene as an internal standard.

### 5.13. Measured the conversion of methyl 4-methylbenzoate (II) in a short time.

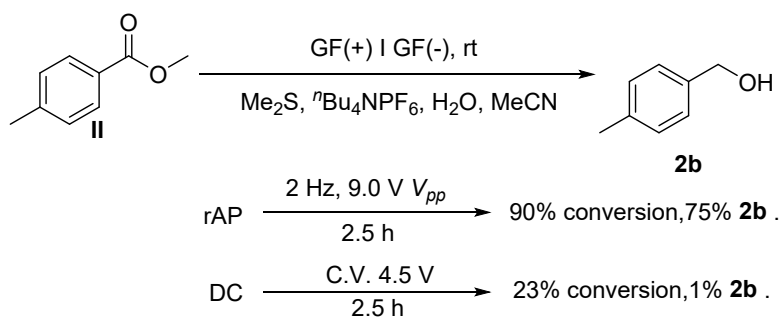



To a 10 mL two-necked heart-shaped flask was charged with methyl 4-methylbenzoate (**II**, 0.3 mmol), Me<sub>2</sub>S (55.8 mg, 0.9 mmol, 3.0 equiv), <sup>n</sup>Bu<sub>4</sub>NPF<sub>6</sub> (116.2 mg, 0.3 mmol, 1.0 equiv), H<sub>2</sub>O (1 ml), MeCN (6 ml) and a magnetic stir bar. The equipment was same as in **General procedure B**. For DC condition, the mixture was stirred under room temperature and 4.5 V constant voltage electrolysis for 2.5 hours. For rAP condition, the mixture was stirred under room temperature and 9.0 V *V*<sub>pp</sub> of rAP (detected by oscilloscope, set 0.9 V on signal generator, peak to peak, 0.45 V from the offset, alternating frequency: 2 Hz) for 2.5 hours. The result was measured by <sup>1</sup>H NMR analysis of crude reaction mixture with mesitylene as an internal standard.

#### 5.14. The H<sub>2</sub> gas evolution reaction.

During the reactions on section 5.13, we observed a lot of H<sub>2</sub> gas evolution from the cathode under DC condition, while no H<sub>2</sub> gas evolution under rAP condition

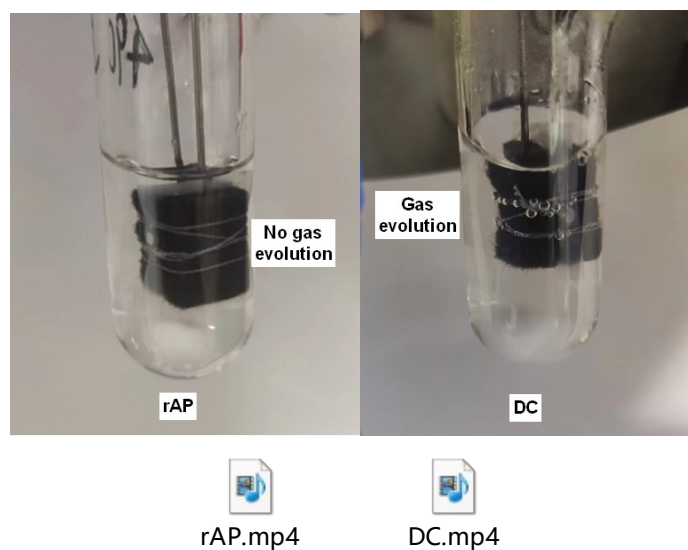

#### 5.15. Other Li<sup>+</sup> salt as electrolyte with dimethyl terephthalate (**I**).

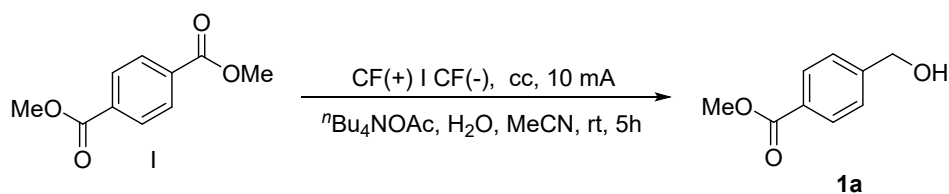

A. LiClO<sub>4</sub> as electrolyte, 87% SM remained, 13% **1a**.

B. LiPF<sub>6</sub>(1 eq) + <sup>n</sup>Bu<sub>4</sub>NOAc as electrolyte, 29% SM remained, 35% **1a**.

To a 10 mL two-necked heart-shaped flask was charged with the dimethyl terephthalate (**I**, 0.3 mmol), electrolyte (0.3 mmol, 1.0 equiv), H<sub>2</sub>O (1 ml), MeCN (6 ml). The equipment was same as in **General procedure A**. The mixture was stirred under room temperature and 10 mA constant current electrolysis for 5 h. The yield was measured by <sup>1</sup>H NMR analysis of crude reaction mixture with mesitylene as an internal standard.

## 6. Unsuccessful substrates

The following substrates were unsuccessful under standard reaction conditions. Yields were determined by HNMR analysis with mesitylene as an internal standard.

### For DC:

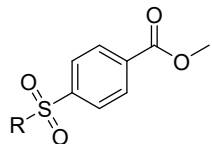

R = OPh or OMe or OEt or  
NHC<sub>3</sub>H<sub>7</sub> or NHPPh

ND, major de-SO<sub>2</sub>R

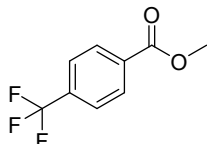

ND, major de-F

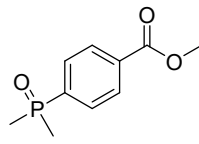

22%

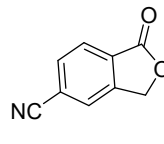

ND, major de-CN

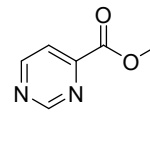

ND, messy

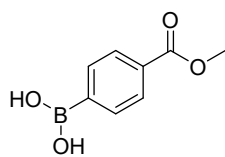

ND, messy

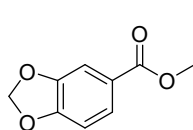

ND, messy

### For rAP:

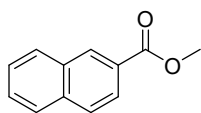

28%

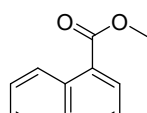

ND, messy

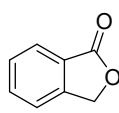

23%

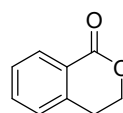

21%

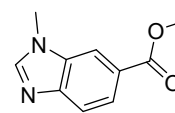

17%

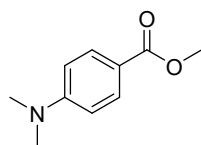

ND, messy

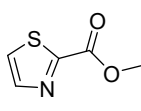

ND, messy

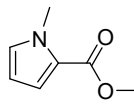

ND, messy

## 7. Analytic data of products

### Methyl 4-(hydroxymethyl)benzoate (1a)<sup>1</sup>

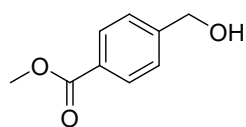

**General procedure A**, reacted for 5 h (6.25 F/mol), white solid. <sup>1</sup>H NMR yield 83%, isolated yield 78%. <sup>1</sup>H NMR (400 MHz, chloroform-*d*) δ 8.02 (d, *J* = 8.0 Hz, 2H), 7.43 (d, *J* = 8.0 Hz, 2H), 4.76 (s, 2H), 3.91 (s, 3H), 1.93 (s, 1H). <sup>13</sup>C NMR (101 MHz, chloroform-*d*) δ 167.0, 146.0, 129.9, 129.4, 126.5, 64.7, 52.1.

### Isobenzofuran-1(3H)-one (1b)<sup>2</sup>

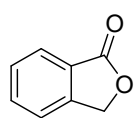

**General procedure A**, reacted for 13 h (16.25 F/mol), white solid. <sup>1</sup>H NMR yield 87%, isolated yield 75%. <sup>1</sup>H NMR (400 MHz, chloroform-*d*) δ 7.93 (d, *J* = 7.6 Hz, 1H), 7.69 (td, *J* = 7.5, 1.0 Hz, 1H), 7.54 (t, *J* = 7.5 Hz, 1H), 7.50 (dt, *J* = 7.6, 1.0 Hz, 1H), 5.33 (s, 2H). <sup>13</sup>C NMR (101 MHz, chloroform-*d*) δ 171.1, 146.5, 134.0, 129.0, 125.8, 122.1, 69.6.

### 4-(Hydroxymethyl)benzonitrile (1c/1d/1e)<sup>1</sup>

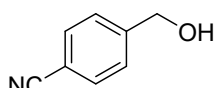

**General procedure A**, with methyl 4-cyanobenzoate, 3.5 V constant voltage, reacted for 8.5 h (7 F/mol), white solid. <sup>1</sup>H NMR yield 87%, isolated yield 72%. <sup>1</sup>H NMR (400 MHz, chloroform-*d*) δ 7.64 (d, *J* = 8.0 Hz, 2H), 7.47 (d, *J* = 8.0 Hz, 2H), 4.77 (s, 2H), 2.05 (s, 1H). <sup>13</sup>C NMR (101 MHz, chloroform-*d*) δ 146.2, 132.3, 127.0, 118.8, 111.2, 64.2.

**General procedure A**, with butyl 4-cyanobenzoate, reacted for 5 h (6.25 F/mol). <sup>1</sup>H NMR yield 66%.

**General procedure A**, with phenyl 4-cyanobenzoate with and 4.5 V constant voltage, reacted for 17 h (17.75 F/mol). <sup>1</sup>H NMR yield 54%.

### 5-(Hydroxymethyl)isobenzofuran-1(3H)-one (1f)<sup>3</sup>

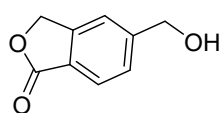

**General procedure A**, with 3.5 V constant voltage, reacted for 7 h (5.63 F/mol), white solid. <sup>1</sup>H NMR yield 72%, isolated yield 65%. <sup>1</sup>H NMR (400 MHz, chloroform-*d*) δ 7.88 (d, *J* = 7.9 Hz, 1H), 7.54 (s, 1H), 7.50 (d, *J* = 7.9 Hz, 1H), 5.30 (s, 2H), 4.86 (s, 2H). <sup>13</sup>C NMR (101 MHz, chloroform-*d*) δ 170.9, 147.9, 147.2, 127.4, 125.8, 124.9, 119.8, 69.6, 64.5.

### Diethyl (4-(hydroxymethyl)phenyl)phosphonate (1g)<sup>4</sup>

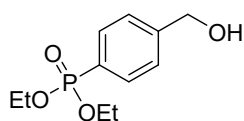

**General procedure A**, with ethyl 4-(diethoxyphosphoryl)benzoate and Tol<sub>3</sub>N (0.2 equiv), 15 mA constant current, reacted for 14 h (26.25 F/mol), colourless oil. <sup>1</sup>H NMR yield 73%, isolated yield 65%. <sup>1</sup>H NMR (400 MHz, chloroform-*d*) δ 7.68 (dd, *J* = 13.2, 8.1 Hz, 2H), 7.41 (dd, *J* = 8.1, 4.0 Hz, 2H), 4.70 (s, 2H), 4.17 – 3.91 (m, 4H), 3.63 (s, 1H), 1.27 (t, *J* = 7.0 Hz, 6H). <sup>13</sup>C NMR (101 MHz, chloroform-*d*) δ 146.4 (d, *J* = 3.2 Hz), 131.8 (d, *J* = 10.3 Hz), 126.6 (d, *J* = 189.8 Hz), 126.5 (d, *J* = 15.4 Hz), 64.2 (d, *J* = 1.3 Hz), 62.2 (d, *J* = 5.5 Hz), 16.3 (d, *J* = 6.5 Hz). <sup>31</sup>P NMR (162 MHz, chloroform-*d*) δ 19.14.

### Diphenyl (4-(hydroxymethyl)phenyl)phosphonate (1h)

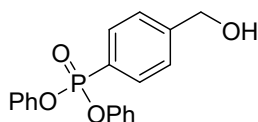

**General procedure A**, reacted for 7 h (8.75 F/mol), colourless oil. <sup>1</sup>H NMR yield 88%, isolated yield 66%. <sup>1</sup>H NMR (400 MHz, chloroform-*d*) δ 7.88 (ddd, *J* = 13.8, 8.0, 1.7 Hz, 2H), 7.45 (dd, *J* = 8.0, 4.5 Hz, 2H), 7.33 – 7.25 (m, 4H), 7.24 – 7.11 (m, 6H), 4.70 (s, 2H), 3.07 (s, 1H). <sup>13</sup>C NMR (101 MHz, chloroform-*d*) δ 150.3 (d,

$J = 7.7$  Hz), 147.1 (d,  $J = 3.4$  Hz), 132.4 (d,  $J = 10.9$  Hz), 129.8, 126.6 (d,  $J = 16.2$  Hz), 125.2 (d,  $J = 1.3$  Hz), 125.2 (d,  $J = 194.7$  Hz), 120.6 (d,  $J = 4.5$  Hz), 64.2.  $^{31}\text{P}$  NMR (162 MHz, chloroform-*d*)  $\delta$  11.94. HRMS  $m/z$  (ESI) called for  $\text{C}_{19}\text{H}_{17}\text{O}_4\text{PNa}^+$  ( $M + \text{Na}$ ) $^+$  363.0762, found 363.0760.

#### (4-(hydroxymethyl)phenyl)diphenylphosphine oxide (1i)<sup>5</sup>

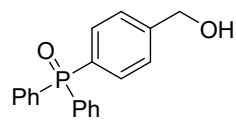

**General procedure A**, with  $\text{ToI}_3\text{N}$  (0.2 equiv), reacted for 6 h (7.5 F/mol), white solid.  $^1\text{H}$  NMR yield 30%, isolated yield 25%.  $^1\text{H}$  NMR (400 MHz, Chloroform-*d*)  $\delta$  7.65 – 7.57 (m, 4H), 7.56 – 7.47 (m, 4H), 7.48 – 7.40 (m, 4H), 7.38 (dd,  $J = 8.2, 2.7$  Hz, 2H), 4.72 (s, 2H), 3.66 (s, 1H).  $^{13}\text{C}$  NMR (101 MHz, Chloroform-*d*)  $\delta$  146.4 (d,  $J = 2.9$  Hz), 132.3 (d,  $J = 104.7$  Hz), 132.1, 132.1 (d,  $J = 7.1$  Hz), 132.0, 130.4 (d,  $J = 106.0$  Hz), 128.5 (d,  $J = 11.9$  Hz), 126.6 (d,  $J = 12.5$  Hz), 64.12.  $^{31}\text{P}$  NMR (162 MHz, Chloroform-*d*)  $\delta$  29.88.

#### (4-(4,4,5,5-Tetramethyl-1,3,2-dioxaborolan-2-yl)phenyl)methanol (1j)<sup>6</sup>

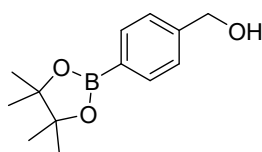

**General procedure A**, with  $\text{ToI}_3\text{N}$  (0.2 equiv), reacted for 16 h (20 F/mol), yellow solid.  $^1\text{H}$  NMR yield 38%, isolated yield 35%.  $^1\text{H}$  NMR (400 MHz, chloroform-*d*)  $\delta$  7.83 (d,  $J = 8.0$  Hz, 2H), 7.39 (d,  $J = 8.0$  Hz, 2H), 4.73 (s, 2H), 2.07 (s, 1H), 1.37 (s, 12H).  $^{13}\text{C}$  NMR (101 MHz, chloroform-*d*)  $\delta$  144.0, 135.1, 126.1, 83.8, 65.2, 24.9.  $^{11}\text{B}$  NMR (128 MHz, chloroform-*d*)  $\delta$  30.05.

#### 4-(hydroxymethyl)benzoic acid (1k)<sup>7</sup>

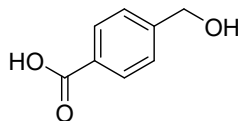

**General procedure A**, reacted for 9 h (11.25 F/mol), white solid.  $^1\text{H}$  NMR yield 36%, isolated yield 32%.  $^1\text{H}$  NMR (400 MHz, DMSO-*d*<sub>6</sub>)  $\delta$  12.83 (s, 1H), 7.91 (d,  $J = 8.0$  Hz, 2H), 7.44 (d,  $J = 8.0$  Hz, 2H), 5.35 (s, 1H), 4.58 (s, 2H).  $^{13}\text{C}$  NMR (101 MHz, DMSO-*d*<sub>6</sub>)  $\delta$  167.8, 148.3, 129.7, 129.6, 126.6, 62.90.

#### Methyl 6-(hydroxymethyl)-2-naphthoate (1l)<sup>8</sup>

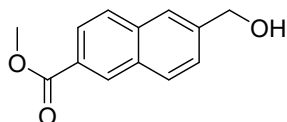

**General procedure A**, with  $\text{ToI}_3\text{N}$  (0.2 equiv), reacted for 8 h (10 F/mol), white solid.  $^1\text{H}$  NMR yield 68%, isolated yield 54%.  $^1\text{H}$  NMR (400 MHz, chloroform-*d*)  $\delta$  8.57 (s, 1H), 8.04 (dd,  $J = 8.6, 1.7$  Hz, 1H), 7.92 (d,  $J = 8.6$  Hz, 1H), 7.88 – 7.81 (m, 2H), 7.52 (dd,  $J = 8.4, 1.7$  Hz, 1H), 4.88 (s, 2H), 3.98 (s, 3H), 2.08 (s, 1H).  $^{13}\text{C}$  NMR (101 MHz, chloroform-*d*)  $\delta$  167.3, 141.0, 135.5, 131.9, 130.9, 129.7, 128.1, 127.3, 125.8, 125.6, 125.0, 65.2, 52.3.

#### 4-(hydroxymethyl)-3-methylbenzonitrile (1m)<sup>9</sup>

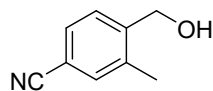

**General procedure A**, with 7.5 mA constant current, reacted for 11 h (10.3 F/mol), white solid.  $^1\text{H}$  NMR yield 70%, isolated yield 57%.  $^1\text{H}$  NMR (400 MHz, chloroform-*d*)  $\delta$  7.57 – 7.48 (m, 2H), 7.42 (d,  $J = 1.6$  Hz, 1H), 4.74 (s, 2H), 2.32 (s, 3H), 2.03 (s, 1H).  $^{13}\text{C}$  NMR (101 MHz, chloroform-*d*)  $\delta$  144.2, 136.7, 133.3, 130.0, 127.1, 119.1, 110.9, 62.5, 18.4.

#### 4-(hydroxymethyl)-2-methylbenzonitrile (1n)<sup>9</sup>

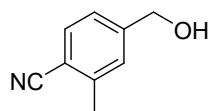

**General procedure A**, with 3.5 V constant voltage, reacted for 12 h (8 F/mol), colourless oil.  $^1\text{H}$  NMR yield 70%, isolated yield 54%.  $^1\text{H}$  NMR (400 MHz, chloroform-*d*)  $\delta$  7.57 (d,  $J = 8.0$  Hz, 1H), 7.33 (s, 1H), 7.26 (d,  $J = 8.0$  Hz, 1H), 4.73 (s, 2H), 2.54 (s, 3H), 2.16 (s, 1H).  $^{13}\text{C}$  NMR (101 MHz, chloroform-*d*)  $\delta$  146.0, 142.2, 132.7, 128.2,

124.3, 118.2, 111.5, 64.3, 20.5.

#### 4-(Hydroxymethyl)-2-methoxybenzonitrile (1o)<sup>10</sup>

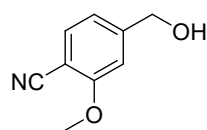

**General procedure A**, reacted for 5 h (6.25 F/mol), white solid. <sup>1</sup>H NMR yield 65%, isolated yield 60%. <sup>1</sup>H NMR (400 MHz, chloroform-*d*)  $\delta$  7.47 (d,  $J = 7.9$  Hz, 1H), 7.02 (s, 1H), 6.94 (d,  $J = 7.9$  Hz, 1H), 4.73 (s, 2H), 3.91 (s, 3H), 2.52 (s, 1H).

<sup>13</sup>C NMR (101 MHz, chloroform-*d*)  $\delta$  161.6, 148.7, 133.7, 118.5, 116.7, 109.1, 100.2, 64.2, 56.1.

#### 2-(But-3-en-1-yloxy)-4-(hydroxymethyl)benzonitrile (1p)

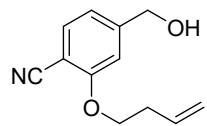

**General procedure A**, reacted for 5 h (6.25 F/mol), colourless oil. <sup>1</sup>H NMR yield 68%, isolated yield 56%. <sup>1</sup>H NMR (400 MHz, chloroform-*d*)  $\delta$  7.48 (d,  $J = 7.8$  Hz, 1H), 7.01 (d,  $J = 1.3$  Hz, 1H), 6.94 (dd,  $J = 7.8, 1.3$  Hz, 1H), 5.91 (ddt,  $J = 17.1, 10.2, 6.8$  Hz, 1H), 5.30 – 5.02 (m, 2H), 4.73 (s, 2H), 4.11 (t,  $J = 6.7$  Hz, 2H), 2.66 – 2.55 (m, 2H), 2.29 (s, 1H).

<sup>13</sup>C NMR (101 MHz, chloroform-*d*)  $\delta$  160.9, 148.4, 133.7, 133.6, 118.5, 117.8, 116.5, 110.0, 100.7, 68.3, 64.3, 33.3. HRMS  $m/z$  (ESI) called for C<sub>12</sub>H<sub>13</sub>NO<sub>2</sub>Na<sup>+</sup> (M + Na)<sup>+</sup> 226.0844, found 226.0843.

#### 4-(Hydroxymethyl)-2-(prop-2-yn-1-yloxy)benzonitrile (1q)

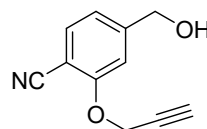

**General procedure A**, reacted for 5 h (6.25 F/mol), white solid. Melting point: 79 – 81 °C. <sup>1</sup>H NMR yield 53%, isolated yield 48%. <sup>1</sup>H NMR (400 MHz, chloroform-*d*)  $\delta$  7.53 (d,  $J = 7.9$  Hz, 1H), 7.18 (s, 1H), 7.02 (d,  $J = 7.9$  Hz, 1H), 4.83 (d,  $J = 2.3$  Hz, 2H), 4.76 (s, 2H), 2.57 (s, 1H), 2.19 (s, 1H).

<sup>13</sup>C NMR (101 MHz, chloroform-*d*)  $\delta$  159.4, 148.4, 133.9, 119.4, 116.3, 110.6, 101.1, 77.2, 76.9, 64.3, 56.5. HRMS  $m/z$  (ESI) called for C<sub>11</sub>H<sub>9</sub>NO<sub>2</sub>Na<sup>+</sup> (M + Na)<sup>+</sup> 210.0531, found 210.0528.

#### 2-((5-Cyanopentyl)oxy)-4-(hydroxymethyl)benzonitrile (1r)

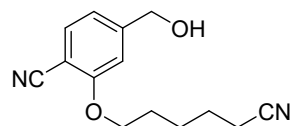

**General procedure A**, reacted for 5 h (6.25 F/mol), colourless oil. <sup>1</sup>H NMR yield 50%, isolated yield 45%. <sup>1</sup>H NMR (400 MHz, chloroform-*d*)  $\delta$  7.48 (d,  $J = 7.8$  Hz, 1H), 7.00 (s, 1H), 6.94 (d,  $J = 7.8$  Hz, 1H), 4.71 (s, 2H), 4.09 (t,  $J = 6.1$  Hz, 2H), 2.39 (t,  $J = 6.9$  Hz, 2H), 1.93 – 1.83 (m, 2H), 1.81 – 1.72 (m, 2H), 1.73 – 1.61 (m, 2H).

<sup>13</sup>C NMR (101 MHz, chloroform-*d*)  $\delta$  160.9, 148.6, 133.7, 119.7, 118.6, 116.6, 110.0, 100.5, 68.6, 64.2, 28.1, 25.3, 25.0, 17.1. HRMS  $m/z$  (ESI) called for C<sub>14</sub>H<sub>16</sub>N<sub>2</sub>O<sub>2</sub>Na<sup>+</sup> (M + Na)<sup>+</sup> 227.1109, found 227.1108.

#### 2-(2-Fluoroethoxy)-4-(hydroxymethyl)benzonitrile (1s)

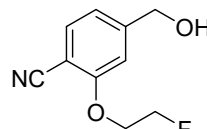

**General procedure A**, reacted for 5 h (6.25 F/mol), white solid. Melting point: 87 – 89 °C. <sup>1</sup>H NMR yield 67%, isolated yield 60%. <sup>1</sup>H NMR (400 MHz, chloroform-*d*)  $\delta$  7.54 (d,  $J = 7.9$  Hz, 1H), 7.06 (s, 1H), 7.00 (d,  $J = 7.9$  Hz, 1H), 4.95 – 4.85 (m, 1H), 4.78 – 4.74 (m, 1H), 4.76 (s, 2H), 4.45 – 4.37 (m, 1H), 4.37 – 4.29 (m, 1H), 2.03 (s, 1H).

<sup>13</sup>C NMR (101 MHz, chloroform-*d*)  $\delta$  160.4, 148.4, 133.9, 119.1, 116.2, 110.3, 101.1, 81.5 (d,  $J = 172.0$  Hz), 68.2 (d,  $J = 21.2$  Hz), 64.3. <sup>19</sup>F NMR (376 MHz, chloroform-*d*)  $\delta$  –223.5. HRMS  $m/z$  (ESI) called for C<sub>10</sub>H<sub>10</sub>FNO<sub>2</sub>Na<sup>+</sup> (M + Na)<sup>+</sup> 218.0593, found 218.0590.

#### Methyl 4-(2-(2-cyano-5-(hydroxymethyl)phenoxy)ethyl)benzoate (1t)

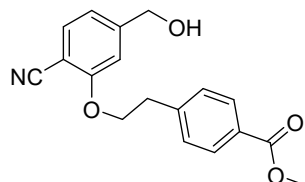

**General procedure A**, reacted for 5 h (6.25 F/mol), white solid. Melting point: 117 – 119 °C. <sup>1</sup>H NMR yield 44%, isolated yield 39%. <sup>1</sup>H

NMR (600 MHz, chloroform-*d*)  $\delta$  7.97 (d,  $J = 7.9$  Hz, 2H), 7.46 (d,  $J = 7.9$  Hz, 1H), 7.39 (d,  $J = 7.9$  Hz, 2H), 6.98 (s, 1H), 6.92 (d,  $J = 7.9$  Hz, 1H), 4.71 (s, 2H), 4.26 (t,  $J = 6.5$  Hz, 2H), 3.89 (s, 3H), 3.18 (t,  $J = 6.5$  Hz, 2H), 2.49 (s, 1H).  $^{13}\text{C}$  NMR (151 MHz, chloroform-*d*)  $\delta$  167.1, 160.7, 148.6, 143.2, 133.7, 129.9, 129.4, 128.6, 118.7, 116.5, 109.8, 100.5, 69.1, 64.2, 52.1, 35.6. HRMS  $m/z$  (ESI) called for  $\text{C}_{18}\text{H}_{17}\text{NO}_4\text{Na}^+$  ( $M + \text{Na}$ ) $^+$  334.1055, found 334.1052.

#### Pyridin-2-ylmethanol (1u)<sup>1</sup>

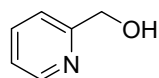

**General procedure A**, with 3.3 V constant voltage, reacted for 14 h (6.5 F/mol), colourless oil.  $^1\text{H}$  NMR yield 47%, isolated yield 40%.  $^1\text{H}$  NMR (400 MHz, chloroform-*d*)  $\delta$  8.51 (d,  $J = 5.0$  Hz, 1H), 7.67 (td,  $J = 7.8, 1.7$  Hz, 1H), 7.28 (d,  $J = 7.8$  Hz, 1H), 7.22 – 7.13 (m, 1H), 4.74 (s, 2H), 4.61 (s, 1H).  $^{13}\text{C}$  NMR (101 MHz, chloroform-*d*)  $\delta$  159.4, 148.4, 136.9, 122.4, 120.8, 64.3.

#### Pyridin-4-ylmethanol (1v)<sup>1</sup>

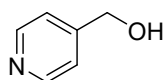

**General procedure A**, with 7.5 mA constant current, reacted for 16 h (15 F/mol), white solid.  $^1\text{H}$  NMR yield 65%, isolated yield 51%.  $^1\text{H}$  NMR (400 MHz, chloroform-*d*)  $\delta$  8.44 (d,  $J = 5.1$  Hz, 2H), 7.30 (d,  $J = 5.1$  Hz, 2H), 4.80 (s, 1H), 4.73 (s, 2H).  $^{13}\text{C}$  NMR (101 MHz, chloroform-*d*)  $\delta$  151.4, 149.1, 121.3, 62.9.

#### Phenylmethanol (2a)<sup>1</sup>

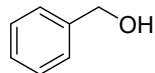

**General procedure B**, reacted for 3.5 h, colourless oil.  $^1\text{H}$  NMR yield 65%, isolated yield 63%.  $^1\text{H}$  NMR (400 MHz, chloroform-*d*)  $\delta$  7.44 – 7.19 (m, 5H), 4.69 (s, 2H), 1.88 (s, 1H).  $^{13}\text{C}$  NMR (101 MHz, chloroform-*d*)  $\delta$  140.9, 128.6, 127.7, 127.0, 65.4.

#### *p*-Tolylmethanol (2b/2c/2d)<sup>1</sup>

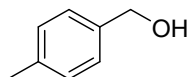

**General procedure B**, with methyl 4-methylbenzoate, reacted for 10 h, white solid.  $^1\text{H}$  NMR yield 90%, isolated yield 86%.  $^1\text{H}$  NMR (400 MHz, chloroform-*d*)  $\delta$  7.26 (d,  $J = 8.0$  Hz, 2H), 7.18 (d,  $J = 8.0$  Hz, 2H), 4.65 (s, 2H), 2.36 (s, 3H), 1.64 (s, 1H).  $^{13}\text{C}$  NMR (101 MHz, chloroform-*d*)  $\delta$  137.9, 137.4, 129.3, 127.1, 65.3, 21.2.

**General procedure B**, with butyl 4-methylbenzoate, reacted for 3 h.  $^1\text{H}$  NMR yield 74%.

**General procedure B**, with phenyl 4-methylbenzoate, reacted for 22 h.  $^1\text{H}$  NMR yield 66%.

#### *m*-Tolylmethanol (2e)<sup>11</sup>

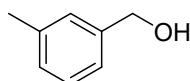

**General procedure B**, reacted for 3.5 h, colourless oil.  $^1\text{H}$  NMR yield 79%, isolated yield 65%.  $^1\text{H}$  NMR (400 MHz, chloroform-*d*)  $\delta$  7.23 (d,  $J = 7.4$  Hz, 1H), 7.19 – 7.05 (m, 3H), 4.63 (s, 2H), 2.35 (s, 3H), 1.86 (s, 1H).  $^{13}\text{C}$  NMR (101 MHz, chloroform-*d*)  $\delta$  140.8, 138.3, 128.5, 128.4, 127.8, 124.1, 65.4, 21.4.

#### *o*-Tolylmethanol (2f)<sup>1</sup>

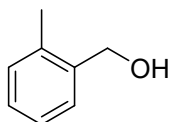

**General procedure B**, reacted for 3.5 h, colourless oil.  $^1\text{H}$  NMR yield 78%, isolated yield 68%.  $^1\text{H}$  NMR (400 MHz, chloroform-*d*)  $\delta$  7.37 – 7.34 (m, 1H), 7.25 – 7.16 (m, 3H), 4.70 (s, 2H), 2.36 (s, 3H), 1.64 (s, 1H).  $^{13}\text{C}$  NMR (101 MHz, chloroform-*d*)  $\delta$  138.7, 136.1, 130.4, 127.8, 127.6, 126.1, 63.6, 18.7.

#### (3,5-Dimethylphenyl)methanol (2g)<sup>12</sup>

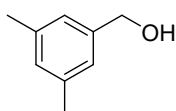

**General procedure B**, reacted for 3.5 h, colourless oil.  $^1\text{H}$  NMR yield 84%, isolated yield 82%.  $^1\text{H}$  NMR (400 MHz, chloroform-*d*)  $\delta$  6.99 (s, 2H), 6.95 (s, 1H), 4.62 (s, 2H), 2.33 (s, 6H), 1.78 (s, 1H).  $^{13}\text{C}$  NMR (101 MHz, chloroform-*d*)  $\delta$  140.8, 138.2,

129.3, 124.9, 65.4, 21.3.

**Mesitylmethanol (2h)**<sup>13</sup>

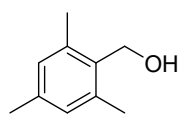

**General procedure B**, with trimethyl borate (0.2 equiv), reacted for 17 h, white solid. <sup>1</sup>H NMR yield 68%, isolated yield 61%. <sup>1</sup>H NMR (400 MHz, chloroform-*d*)  $\delta$  6.88 (s, 2H), 4.71 (s, 2H), 2.40 (s, 6H), 2.28 (s, 3H), 1.29 (s, 1H). <sup>13</sup>C NMR (101 MHz, chloroform-*d*)  $\delta$  137.7, 137.3, 133.7, 129.2, 59.2, 21.0, 19.4.

**(4-(tert-Butyl)phenyl)methanol (2i)**<sup>13</sup>

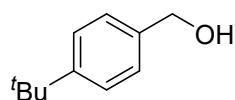

**General procedure B**, reacted for 9 h, colourless oil. <sup>1</sup>H NMR yield 76%, isolated yield 73%. <sup>1</sup>H NMR (400 MHz, chloroform-*d*)  $\delta$  7.41 (d, *J* = 8.4 Hz, 2H), 7.31 (d, *J* = 8.4 Hz, 2H), 4.66 (s, 2H), 1.80 (s, 1H), 1.34 (s, 9H). <sup>13</sup>C NMR (101 MHz, chloroform-*d*)  $\delta$  150.7, 138.0, 126.9, 125.5, 65.2, 34.6, 31.3.

**[1, 1'-Biphenyl]-4-ylmethanol (2j)**<sup>1</sup>

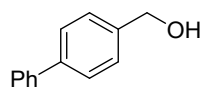

**General procedure B**, reacted for 9 h, white solid. <sup>1</sup>H NMR yield 91%, isolated yield 90%. <sup>1</sup>H NMR (400 MHz, chloroform-*d*)  $\delta$  7.61 (d, *J* = 8.0 Hz, 4H), 7.46 (t, *J* = 7.9 Hz, 4H), 7.41 – 7.28 (m, 1H), 4.74 (s, 2H), 1.92 (s, 1H). <sup>13</sup>C NMR (101 MHz, chloroform-*d*)  $\delta$  140.8, 140.7, 139.9, 128.8, 127.5, 127.4, 127.1, 65.1.

**(4-(Trimethylsilyl)phenyl)methanol (2k)**<sup>14</sup>

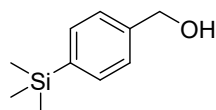

**General procedure B**, reacted for 3 h, colourless oil. <sup>1</sup>H NMR yield 81%, isolated yield 74%. <sup>1</sup>H NMR (400 MHz, chloroform-*d*)  $\delta$  7.54 (d, *J* = 8.0 Hz, 2H), 7.36 (d, *J* = 8.0 Hz, 2H), 4.68 (s, 2H), 2.01 (s, 1H), 0.28 (s, 9H). <sup>13</sup>C NMR (101 MHz, chloroform-*d*)  $\delta$  142.5, 141.0, 134.7, 127.5, 66.4, 0.0.

**(4-Methoxyphenyl)methanol (2l)**<sup>1</sup>

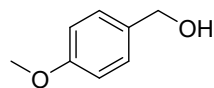

**General procedure B**, reacted for 10 h, colourless oil. <sup>1</sup>H NMR yield 65%, isolated yield 64%. <sup>1</sup>H NMR (400 MHz, chloroform-*d*)  $\delta$  7.29 (d, *J* = 8.6 Hz, 2H), 6.89 (d, *J* = 8.6 Hz, 2H), 4.61 (s, 2H), 3.81 (s, 3H), 1.74 (s, 1H). <sup>13</sup>C NMR (101 MHz, chloroform-*d*)  $\delta$  159.2, 133.1, 128.7, 114.0, 65.1, 55.3.

**(3,5-dimethoxyphenyl)methanol (2m)**<sup>15</sup>

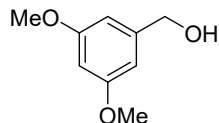

**General procedure B**, reacted for 3.5 h, white solid. <sup>1</sup>H NMR yield 32%, isolated yield 29%. <sup>1</sup>H NMR (400 MHz, Chloroform-*d*)  $\delta$  6.52 (d, *J* = 2.3 Hz, 2H), 6.39 (d, *J* = 2.3 Hz, 1H), 4.63 (s, 2H), 3.79 (s, 6H), 1.89 – 1.80 (s, 1H). <sup>13</sup>C NMR (101 MHz, chloroform-*d*)  $\delta$  161.0, 143.4, 104.6, 99.7, 65.4, 55.4.

**(4-Phenoxyphenyl)methanol (2n)**<sup>16</sup>

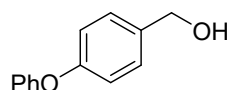

**General procedure B**, reacted for 10 h, white solid. <sup>1</sup>H NMR yield 91%, isolated yield 84%. <sup>1</sup>H NMR (400 MHz, chloroform-*d*)  $\delta$  7.38 – 7.30 (m, 4H), 7.14 – 7.09 (m, 1H), 7.04 – 6.98 (m, 4H), 4.65 (s, 2H), 2.06 (s, 1H). <sup>13</sup>C NMR (101 MHz, chloroform-*d*)  $\delta$  157.2, 156.8, 135.8, 129.8, 128.7, 123.3, 119.0, 118.9, 64.9.

**(4-(Benzyloxy)phenyl)methanol (2o)**<sup>16</sup>

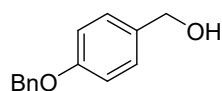

**General procedure B**, reacted for 17 h, white solid. <sup>1</sup>H NMR yield 66%, isolated yield 59%. <sup>1</sup>H NMR (600 MHz, chloroform-*d*)  $\delta$  7.44 (d, *J* = 7.5 Hz, 2H), 7.40 (t, *J* = 7.5 Hz, 2H), 7.34 (t, *J* = 7.5 Hz, 1H), 7.29 (d, *J* = 8.2 Hz, 2H), 6.98 (d, *J* = 8.2

Hz, 2H), 5.08 (s, 2H), 4.61(s, 2H), 1.78(s, 1H). <sup>13</sup>C NMR (151 MHz, chloroform-*d*) δ 158.4, 137.0, 133.4, 128.7, 128.6, 128.0, 127.5, 115.0, 70.1, 65.0.

#### 4-(Hydroxymethyl)phenyl butyrate (2p)<sup>17</sup>

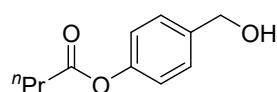

**General procedure B**, reacted for 3 h, colourless oil. <sup>1</sup>H NMR yield 72%, isolated yield 69%. <sup>1</sup>H NMR (600 MHz, chloroform-*d*) δ 7.34 (d, *J* = 8.2 Hz, 2H), 7.05 (d, *J* = 8.2 Hz, 2H), 4.63(s, 2H), 2.53 (t, *J* = 7.4 Hz, 2H), 2.14(s, 1H), 1.78 (q, *J* = 7.4 Hz, 2H), 1.04 (t, *J* = 7.4 Hz, 3H). <sup>13</sup>C NMR (151 MHz, chloroform-*d*) δ 172.4, 150.1, 138.5, 128.1, 121.7, 64.7, 36.2, 18.5, 13.7.

#### (4-(Methylthio)phenyl)methanol (2q)<sup>11</sup>

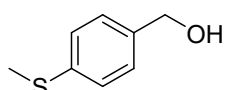

**General procedure B**, reacted for 3 h, colourless oil. <sup>1</sup>H NMR yield 62%, isolated yield 54%. <sup>1</sup>H NMR (600 MHz, chloroform-*d*) δ 7.26 (q, *J* = 8.0 Hz, 4H), 4.63(s, 2H), 2.48(s, 3H), 1.86(s, 1H). <sup>13</sup>C NMR (151 MHz, chloroform-*d*) δ 137.8, 137.8, 127.7, 126.8, 64.9, 16.0.

#### N-(4-(Hydroxymethyl)phenyl)acetamide (2r)<sup>18</sup>

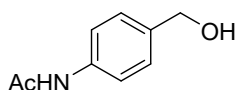

**General procedure B**, reacted for 10 h, white solid. <sup>1</sup>H NMR yield 56%, isolated yield 51%. <sup>1</sup>H NMR (600 MHz, methanol-*d*<sub>4</sub>) δ 7.53 (d, *J* = 8.2 Hz, 2H), 7.31 (d, *J* = 8.2 Hz, 2H), 4.57(s, 2H), 2.13(s, 3H). <sup>13</sup>C NMR (151 MHz, methanol-*d*<sub>4</sub>) δ 170.2, 137.7, 137.1, 127.2, 119.7, 63.5, 22.4.

#### (4-(1H-Imidazol-1-yl)phenyl)methanol (2s)<sup>19</sup>

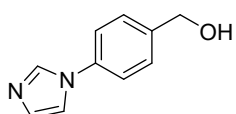

**General procedure B**, reacted for 10 h, white solid. <sup>1</sup>H NMR yield 44%, isolated yield 38%. <sup>1</sup>H NMR (400 MHz, chloroform-*d*) δ 7.76 (t, *J* = 1.2 Hz, 1H), 7.49 (d, *J* = 8.4 Hz, 2H), 7.35 (d, *J* = 8.4 Hz, 2H), 7.26 (s, 1H), 7.17 (t, *J* = 1.2 Hz, 1H), 4.76 (s, 2H), 3.12 (s, 1H). <sup>13</sup>C NMR (101 MHz, chloroform-*d*) δ 140.2, 136.4, 135.6, 130.2, 128.4, 121.5, 118.3, 64.2.

#### Thiophen-2-ylmethanol (2t)<sup>1</sup>

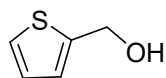

**General procedure B**, with trimethyl borate (0.2 equiv) and 8.0 V *V*<sub>pp</sub> of rAP, reacted for 5 h, yellow oil. <sup>1</sup>H NMR yield 42%, isolated yield 36%. <sup>1</sup>H NMR (400 MHz, chloroform-*d*) δ 7.45 – 7.20 (m, 1H), 7.05 – 6.95 (m, 2H), 4.83 (s, 2H), 1.95 (s, 1H). <sup>13</sup>C NMR (101 MHz, chloroform-*d*) δ 144.0, 126.9, 125.6, 125.5, 60.0.

#### Benzo[*b*]thiophen-2-ylmethanol (2u)<sup>19</sup>

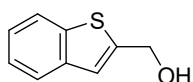

**General procedure B**, reacted for 3 h, white solid. <sup>1</sup>H NMR yield 40%, isolated yield 39%. <sup>1</sup>H NMR (400 MHz, chloroform-*d*) δ 7.82 (d, *J* = 7.2 Hz, 1H), 7.73 (dd, *J* = 7.2, 1.9 Hz, 1H), 7.33 (pd, *J* = 7.2, 1.4 Hz, 2H), 7.21 (s, 1H), 4.92 (s, 2H), 2.10 (s, 1H). <sup>13</sup>C NMR (101 MHz, chloroform-*d*) δ 144.8, 134.0, 139.6, 124.4, 124.3, 123.6, 122.5, 121.5, 60.9.

#### Furan-2-ylmethanol (2v)<sup>1</sup>

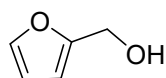

**General procedure B**, reacted for 3 h, colourless oil. <sup>1</sup>H NMR yield 28%, isolated yield 25%. <sup>1</sup>H NMR (400 MHz, chloroform-*d*) δ 7.40 (dd, *J* = 1.8, 0.8 Hz, 1H), 6.34 (dd, *J* = 3.2, 1.8 Hz, 1H), 6.29 (dd, *J* = 3.2, 0.8 Hz, 1H), 4.59 (s, 2H), 2.12 (s, 1H). <sup>13</sup>C NMR (101 MHz, chloroform-*d*) δ 154.0, 142.6, 110.4, 107.8, 57.3.



### Benzofuran-2-ylmethanol (2w)<sup>20</sup>

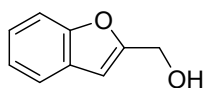

**General procedure B**, reacted for 3 h, colourless oil. <sup>1</sup>H NMR yield 40%, isolated yield 34%. <sup>1</sup>H NMR (400 MHz, chloroform-*d*) δ 7.54 (d, *J* = 8.0 Hz, 1H), 7.46 (d, *J* = 8.0 Hz, 1H), 7.30 – 7.16 (m, 2H), 6.64 (s, 1H), 4.76 (s, 2H), 2.14 (s, 1H). <sup>13</sup>C NMR (101 MHz, chloroform-*d*) δ 156.4, 155.1, 128.2, 124.4, 122.9, 121.2, 111.3, 104.2, 58.2.

### (1-Methyl-1H-imidazol-2-yl)methanol (2x)<sup>21</sup>

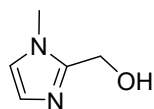

**General procedure B**, reacted for 3.5 h, white solid. <sup>1</sup>H NMR yield 70%, isolated yield 60%. <sup>1</sup>H NMR (400 MHz, chloroform-*d*) δ 6.81 (d, *J* = 1.3 Hz, 1H), 6.77 (d, *J* = 1.3 Hz, 1H), 6.44 (s, 1H), 4.59 (s, 2H), 3.70 (s, 3H). <sup>13</sup>C NMR (101 MHz, chloroform-*d*) δ 148.2, 126.4, 121.4, 55.4, 32.8.

### 2-(hydroxymethyl)phenyl acetate (2y)<sup>22</sup>

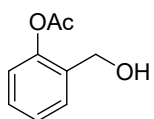

**General procedure B**, with alternating frequency: 10 Hz, reacted for 10 h, yellow oil. <sup>1</sup>H NMR yield 45%, isolated yield 41%. <sup>1</sup>H NMR (400 MHz, chloroform-*d*) δ 7.79 (s, 1H), 7.26 (d, *J* = 7.6 Hz, 2H), 7.01 – 6.84 (m, 2H), 5.12 (s, 2H), 2.10 (s, 3H). <sup>13</sup>C NMR (101 MHz, chloroform-*d*) δ 173.7, 155.5, 132.2, 131.2, 121.7, 120.6, 117.8, 63.3, 21.0.

### 3-(Hydroxymethyl)benzonitrile (2aa)<sup>13</sup>

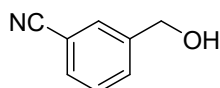

**General procedure B**, reacted for 17 h, colourless oil. <sup>1</sup>H NMR yield 55%, isolated yield 54%. <sup>1</sup>H NMR (400 MHz, chloroform-*d*) δ 7.66 (d, *J* = 1.7 Hz, 1H), 7.63 – 7.54 (m, 2H), 7.46 (t, *J* = 7.7 Hz, 1H), 4.73 (s, 2H), 2.23 (s, 1H). <sup>13</sup>C NMR (101 MHz, chloroform-*d*) δ 142.3, 131.2, 131.1, 130.2, 129.3, 118.8, 112.5, 64.0.

### Methyl 3-(hydroxymethyl)benzoate (2ab)<sup>23</sup>

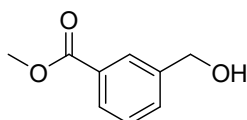

**General procedure B**, reacted for 10 h, white solid. <sup>1</sup>H NMR yield 54%, isolated yield 51%. <sup>1</sup>H NMR (400 MHz, chloroform-*d*) δ 8.03 (s, 1H), 7.96 (d, *J* = 8.0 Hz, 1H), 7.57 (d, *J* = 8.0 Hz, 1H), 7.43 (t, *J* = 8.0 Hz, 1H), 4.75 (s, 2H), 3.91 (s, 3H), 1.98 (s, 1H). <sup>13</sup>C NMR (101 MHz, chloroform-*d*) δ 167.0, 141.2, 131.4, 130.4, 128.8, 128.7, 128.0, 64.8, 52.2.

### (4-Fluorophenyl)methanol (2ac)<sup>1</sup>

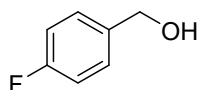

**General procedure B**, reacted for 9 h, colourless oil. <sup>1</sup>H NMR yield 67%, isolated yield 52%. <sup>1</sup>H NMR (400 MHz, chloroform-*d*) δ 7.27 (dd, *J* = 8.7, 5.6 Hz, 2H), 7.01 (t, *J* = 8.7 Hz, 2H), 4.57 (s, 2H), 2.58 (s, 1H). <sup>13</sup>C NMR (101 MHz, chloroform-*d*) δ 162.3 (d, *J* = 245.2 Hz), 136.6 (d, *J* = 3.1 Hz), 128.8 (d, *J* = 8.1 Hz), 115.3 (d, *J* = 21.5 Hz), 64.4. <sup>19</sup>F NMR (376 MHz, chloroform-*d*) δ -114.9.

### (3-Chlorophenyl)methanol (2ad)<sup>24</sup>

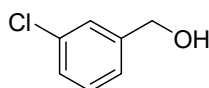

**General procedure B** and 8.0 V *V*<sub>pp</sub> of rAP, reacted for 9 h, colourless oil. <sup>1</sup>H NMR yield 82%, isolated yield 70%. <sup>1</sup>H NMR (400 MHz, chloroform-*d*) δ 7.33 (s, 1H), 7.28 – 7.22 (m, 2H), 7.22 – 7.15 (m, 1H), 4.63 (s, 2H), 2.14 (s, 1H). <sup>13</sup>C NMR (101 MHz, chloroform-*d*) δ 142.8, 134.4, 129.8, 127.7, 127.0, 124.9, 64.5.

### (4-Chlorophenyl)methanol (2ae)<sup>1</sup>

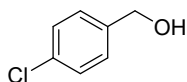

**General procedure B**, reacted for 6 h, white solid. <sup>1</sup>H NMR yield 66%, isolated yield 60%. <sup>1</sup>H NMR (400 MHz, chloroform-*d*) δ 7.26 – 7.17 (m, 4H), 4.58 (s, 2H),

1.74 (s, 1H).  $^{13}\text{C}$  NMR (101 MHz, chloroform-*d*)  $\delta$  139.3, 133.4, 128.7, 128.3, 64.6.

#### (4-Bromophenyl)methanol (2af)<sup>1</sup>

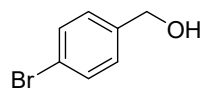

**General procedure B**, and 8.0 V  $V_{pp}$  of rAP, reacted for 7 h, white solid.  $^1\text{H}$  NMR yield 34%, isolated yield 34%.  $^1\text{H}$  NMR (400 MHz, chloroform-*d*)  $\delta$  7.47 (d,  $J$  = 8.4 Hz, 2H), 7.22 (d,  $J$  = 8.4 Hz, 2H), 4.63 (s, 2H), 1.98 (s, 1H).  $^{13}\text{C}$  NMR (101 MHz, chloroform-*d*)  $\delta$  139.8, 131.6, 128.6, 121.5, 64.6.

#### Benzo[d][1,3]dioxol-5-ylmethanol (2ag)<sup>25</sup>

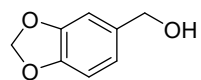

**General procedure B**, reacted for 7 h, white solid.  $^1\text{H}$  NMR yield 30%, isolated yield 29%.  $^1\text{H}$  NMR (400 MHz, chloroform-*d*)  $\delta$  6.87 (s, 1H), 6.84 – 6.75 (m, 2H), 5.95 (s, 2H), 4.57 (d,  $J$  = 5.8 Hz, 2H), 1.72 (t,  $J$  = 5.8 Hz, 1H).  $^{13}\text{C}$  NMR (101 MHz, chloroform-*d*)  $\delta$  147.8, 147.1, 134.9, 120.5, 108.3, 107.9, 101.0, 65.3.

#### Methyl 4-(hydroxymethyl-*d*<sub>2</sub>)benzoate (3a)

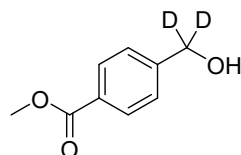

**General procedure C**, reacted for 4 h (5 F/mol), white solid. Melting point: 51 – 53 °C. Isolated yield 60% (95% D).  $^1\text{H}$  NMR (400 MHz, chloroform-*d*)  $\delta$  7.99 (d,  $J$  = 8.4 Hz, 2H), 7.40 (d,  $J$  = 8.4 Hz, 2H), 3.90 (s, 3H), 2.43 (s, 1H).  $^{13}\text{C}$  NMR (151 MHz, chloroform-*d*)  $\delta$  167.1, 146.0, 129.8, 129.2, 126.5, 64.6 – 63.4 (m), 52.2. HRMS  $m/z$  (ESI) called for  $\text{C}_9\text{H}_8\text{D}_2\text{O}_3\text{Na}^+$  ( $M + \text{Na}$ )<sup>+</sup> 191.0653, found 191.0650.

#### 4-(Hydroxymethyl-*d*<sub>2</sub>)benzonitrile (3b)<sup>26</sup>

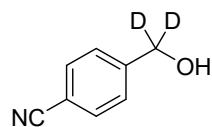

**General procedure C**, with 3.5 V constant voltage, reacted for 5 h (5.75 F/mol), colourless oil. Isolated yield 58% (96% D).  $^1\text{H}$  NMR (600 MHz, chloroform-*d*)  $\delta$  7.64 (d,  $J$  = 7.9 Hz, 2H), 7.48 (d,  $J$  = 7.9 Hz, 2H), 2.30 (s, 1H).  $^{13}\text{C}$  NMR (151 MHz, chloroform-*d*)  $\delta$  146.2, 132.3, 127.1 (d,  $J$  = 2.7 Hz), 118.9, 111.1, 64.8 – 62.4 (m).

#### 3-Fluoro-4-(hydroxymethyl-*d*<sub>2</sub>)benzonitrile (3c)<sup>28</sup>

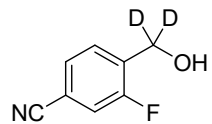

**General procedure C**, reacted for 4 h (5 F/mol), colourless oil. Isolated yield 70% (97% D).  $^1\text{H}$  NMR (400 MHz, chloroform-*d*)  $\delta$  7.64 (t,  $J$  = 7.5 Hz, 1H), 7.48 (d,  $J$  = 7.9 Hz, 1H), 7.33 (d,  $J$  = 9.4 Hz, 1H), 2.44 (s, 1H).  $^{13}\text{C}$  NMR (151 MHz, chloroform-*d*)  $\delta$  159.5 (d,  $J$  = 249.8 Hz), 133.9 (d,  $J$  = 14.6 Hz), 129.6 (d,  $J$  = 5.3 Hz), 128.5 (d,  $J$  = 3.9 Hz), 118.8 (d,  $J$  = 24.5 Hz), 117.7, 112.4 (d,  $J$  = 9.5 Hz), 58.5 – 57.1 (m).  $^{19}\text{F}$  NMR (376 MHz, chloroform-*d*)  $\delta$  -116.4.

#### (2-Fluorophenyl)methan-*d*<sub>2</sub>-ol (3d)<sup>28</sup>

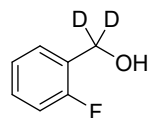

**General procedure D**, with 8.0 V  $V_{pp}$  of rAP, reacted for 3 h, colourless oil. Isolated yield 70% (97% D).  $^1\text{H}$  NMR (400 MHz, chloroform-*d*)  $\delta$  7.42 (td,  $J$  = 7.5, 1.8 Hz, 1H), 7.34 – 7.23 (m, 1H), 7.15 (td,  $J$  = 7.5, 1.2 Hz, 1H), 7.05 (ddd,  $J$  = 10.2, 8.2, 1.2 Hz, 1H), 1.85 (s, 1H).  $^{13}\text{C}$  NMR (151 MHz, chloroform-*d*)  $\delta$  160.7 (d,  $J$  = 246.2 Hz), 129.4 (d,  $J$  = 15.9 Hz), 129.4 (d,  $J$  = 1.5 Hz), 127.7 (d,  $J$  = 14.7 Hz), 124.3 (d,  $J$  = 3.8 Hz), 115.3 (d,  $J$  = 21.2 Hz), 59.9 – 57.7 (m).  $^{19}\text{F}$  NMR (376 MHz, chloroform-*d*)  $\delta$  -119.9.

#### (4-Bromophenyl)methan-*d*<sub>2</sub>-ol (3e)<sup>29</sup>

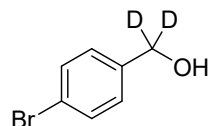

**General procedure D**, reacted for 4.5 h, white solid. Isolated yield 28% (97% D).  $^1\text{H}$  NMR (600 MHz, chloroform-*d*)  $\delta$  7.48 (d,  $J$  = 8.0 Hz, 2H), 7.24 (d,  $J$  = 8.0 Hz, 2H), 1.75 (s, 1H).  $^{13}\text{C}$  NMR (151 MHz, chloroform-*d*)  $\delta$  139.7, 131.7, 128.7, 121.5,

65.0 – 62.8 (m).

**Phenylmethan- $d_2$ -ol (3f)<sup>28</sup>**

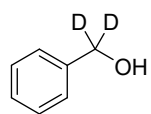

**General procedure D**, with 8.0 V  $V_{pp}$  of rAP, reacted for 3.5 h, colourless oil. Isolated yield 51% (95% D).  $^1\text{H}$  NMR (600 MHz, chloroform- $d$ )  $\delta$  7.52 – 7.03 (m, 5H), 2.63 (s, 1H).  $^{13}\text{C}$  NMR (151 MHz, chloroform- $d$ )  $\delta$  140.8, 128.6, 127.6, 127.1, 65.1 – 63.9 (m).

***p*-Tolylmethan- $d_2$ -ol (3g)<sup>28</sup>**

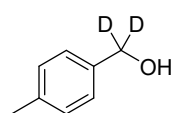

**General procedure D**, reacted for 10 h, white solid. Isolated yield 65% (95% D).  $^1\text{H}$  NMR (400 MHz, chloroform- $d$ )  $\delta$  7.26 (d,  $J$  = 8.0 Hz, 2H), 7.18 (d,  $J$  = 8.0 Hz, 2H), 2.36 (s, 3H), 1.62 (s, 1H).  $^{13}\text{C}$  NMR (151 MHz, chloroform- $d$ )  $\delta$  137.8, 137.5, 129.3, 127.2, 65.0 – 64.5 (m), 21.2.

**(4-Methoxyphenyl)methan- $d_2$ -ol (3h)<sup>28</sup>**

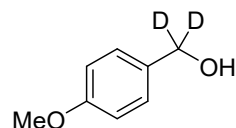

**General procedure D**, reacted for 4 h, colourless oil. Isolated yield 88% (92% D).  $^1\text{H}$  NMR (400 MHz, chloroform- $d$ )  $\delta$  7.27 (d,  $J$  = 8.6 Hz, 2H), 6.88 (d,  $J$  = 8.6 Hz, 2H), 3.80 (s, 3H), 1.91 (s, 1H).  $^{13}\text{C}$  NMR (151 MHz, chloroform- $d$ )  $\delta$  159.2, 133.1, 128.7, 114.0, 66.4 – 63.4 (m), 55.3.

**N-(4-(2-chloroethoxy)-3-(hydroxymethyl- $d_2$ ))phenyl)acetamide (3i)**

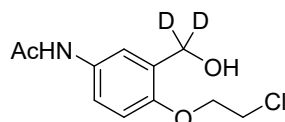

**General procedure D**, with  $\text{LiClO}_4$  as electrolyte, reacted for 8 h, yellow oil. Isolated yield 35% (96% D).  $^1\text{H}$  NMR (600 MHz, methanol- $d_4$ )  $\delta$  7.52 (d,  $J$  = 2.7 Hz, 1H), 7.45 (dd,  $J$  = 8.5, 2.7 Hz, 1H), 6.89 (d,  $J$  = 8.5 Hz, 1H), 4.24 (t,  $J$  = 5.4 Hz, 2H), 3.86 (t,  $J$  = 5.4 Hz, 2H), 2.10 (s, 3H).  $^{13}\text{C}$  NMR (151 MHz, methanol- $d_4$ )  $\delta$  170.1, 152.2, 132.0, 130.3, 120.4, 120.2, 111.6, 68.65, 58.0 – 58.2 (m), 42.1, 22.2.

## 8. References

1. Uozumi, Y.; Hamasaka, G.; Tsuji, H., Organoborane-Catalyzed Hydrogenation of Unactivated Aldehydes with a Hantzsch Ester as a Synthetic NAD(P)H Analogue. *Synlett* **2015**, *26*, 2037-2041.
2. Losch, P.; Felten, A.-S.; Pale, P., Easy, Green and Safe Carbonylation Reactions through Zeolite-Catalyzed Carbon Monoxide Production from Formic Acid. *Adv Synth Catal* **2015**, *357*, 2931-2938.
3. Mori, M.; Kagoshima, Y.; Uchida, T.; Konosu, T.; Shibayama, T. **2002**, Patent WO 2002066465 A1.
4. Pan, L.; Kelley, A. S.; Cooke, M. V.; Deckert, M. M.; Laulhé, S., Transition-Metal-Free Photoredox Phosphonation of Aryl C–N and C–X Bonds in Aqueous Solvent Mixtures. *ACS Sustainable Chem Eng* **2022**, *10*, 691-695.
5. Fu, T.; Qiao, H.; Peng, Z.; Hu, G.; Wu, X.; Gao, Y.; Zhao, Y., Palladium-catalyzed air-based oxidative coupling of arylboronic acids with H-phosphine oxides leading to aryl phosphine oxides. *Organic & Biomolecular Chemistry*, **2014**, *12*, 2895-2902.
6. Stoll, E. L.; Barber, T.; Hirst, D. J.; Denton, R. M., In situ Silane Activation Enables Catalytic Reduction of Carboxylic Acids. *Chem Commun (Camb)* **2022**, *58*, 3509-3512.
7. Yu, H.; Ru, S.; Zhai, Y.; Dai, G.; Han, S.; Wei, Y., An Efficient Aerobic Oxidation Protocol of Aldehydes to Carboxylic Acids in Water Catalyzed by an Inorganic-Ligand-Supported Copper Catalyst. *ChemCatChem* **2018**, *10*, 1253-1257.
8. Groot, F. M. H.; Loos, W. J.; Koekkoek, R.; Berkom, L. W. A.; Busscher, G. F.; Seelen, A. E.; Albrecht, C.; Bruijn, P.; Scheeren, H. W., Elongated Multiple Electronic Cascade and Cyclization Spacer Systems in Activatable Anticancer Prodrugs for Enhanced Drug Release. *J Org Chem* **2001**, *66*(26), 8815–8830.
9. Quattropiani, Anna; Montagne, Cyril; Sauer, Wolfgang; Crosignani, Stefano; Bombrun, Agnes, **2010**, Patent WO2010112461.
10. Gordon, Thomas D.; Morgan, Barry A. **2008**, Patent US7361656.
11. Li, X. G.; Li, F.; Xu, Y.; Xiao, L. J.; Xie, J. H.; Zhou, Q. L., Hydrogenation of Esters by Manganese Catalysts. *Adv Synth Catal* **2022**, *364*, 744-749.
12. Amberchan, G.; Snelling, R. A.; Moya, E.; Landi, M.; Lutz, K.; Gatih, R.; Singaram, B., Reaction of Diisobutylaluminum Borohydride, a Binary Hydride, with Selected Organic Compounds Containing Representative Functional Groups. *J Org Chem* **2021**, *86*, 6207-6227.
13. Yang, Z.; Cheng, W.; Li, Z., Iridium Catalysed Highly Efficient Transfer Hydrogenation Reduction of Aldehydes and Ketones in Water. *Catal Commun* **2018**, *117*, 38-42.
14. Rønne, M. H.; Nissen, F.; Pedersen, P. J.; Larsen, T. O.; Mier, W.; Clausen, M. H., A Mild Method for Regioselective Labeling of Aromatics with Radioactive Iodine. *Eur J Org Chem* **2013**, *2013*, 3970-3973.
15. Fragopoulou, E.; Gkotsi, K.; Petsini, F.; Gioti, K.; Kalampaliki, A.-D.; Lambrinidis, G.; Kostakis, I.-K.; Tenta, R. Synthesis and Biological Evaluation of Resveratrol Methoxy Derivatives. *Molecules*, **2023**, *28*, 5547.

16. Skrypai, V.; Hurley, J. J. M.; Adler, M. J., Silatrane as a Practical and Selective Reagent for the Reduction of Aryl Aldehydes to Benzylic Alcohols. *Eur J Org Chem* **2016**, *2016*, 2207-2211.
17. Zakhari, J. S.; Kinoyama, I.; Hixon, M. S.; Di Mola, A.; Globisch, D.; Janda, K. D., Formulating a New Basis for the Treatment Against Botulinum Neurotoxin Intoxication: 3,4-Diaminopyridine Prodrug Design and Characterization. *Bioorg Med Chem* **2011**, *19*, 6203-6209.
18. Wei, D.; Bruneau-Voisine, A.; Chauvin, T.; Dorcet, V.; Roisnel, T.; Valyaev, D. A.; Lugan, N.; Sortais, J.-B., Hydrogenation of Carbonyl Derivatives Catalysed by Manganese Complexes Bearing Bidentate Pyridinyl-Phosphine Ligands. *Adv Synth Catal* **2018**, *360*, 676-681.
19. Battilocchio, C.; Hawkins, J. M.; Ley, S. V., A Mild and Efficient Flow Procedure for the Transfer Hydrogenation of Ketones and Aldehydes using Hydrous Zirconia. *Org Lett* **2013**, *15*, 2278-2281.
20. Banerjee, T. S.; Paul, S.; Sinha, S.; Das, S., Synthesis of Iboga-like Isoquinuclidines: Dual Opioid Receptors Agonists Having Antinociceptive Properties. *Bioorg Med Chem* **2014**, *22*, 6062-6070.
21. Zhou, Y.-H.; Sun, D.-L.; Tao, J.; Chen, L.-Q.; Huang, Y.-F.; Li, Y.-K.; Cheng, Y., Synthesis, Crystal Structure, and SOD-like Activity of Two Copper(II) Complexes with Hydroxymethyl Pendants. *J Coord Chem* **2014**, *67*, 2393-2404.
22. Kaithal, A.; Chatterjee, B.; Gunanathan, C. Ruthenium Catalyzed Selective Hydroboration of Carbonyl Compounds. *Org. Lett.* **2015**, *17*, 4790-479.
23. Veron, J.-B.; Joshi, A.; Wallinder, C.; Larhed, M.; Odell, L.R., Synthesis and Evaluation of Isoleucine Derived Angiotensin II AT2 Receptor Ligands. *Bioorg Med Chem Lett*, **2014**, *24*, 476-479.
24. Behera, R. R.; Ghosh, R.; Panda, S.; Khamari, S.; Bagh, B., Hydrosilylation of Esters Catalyzed by Bisphosphine Manganese(I) Complex: Selective Transformation of Esters to Alcohols. *Org Lett* **2020**, *22*, 3642-3648.
25. Hamasaka, G.; Tsuji, H.; Uozumi, Y. Organoborane-Catalyzed Hydrogenation of Unactivated Aldehydes with a Hantzsch Ester as a Synthetic NAD(P)H Analogue. *Synlett*, **2015**, *26*, 2037-2041.
26. Klausen, R. S.; Kennedy, C. R.; Hyde, A. M.; Jacobsen, E. N., Chiral Thioureas Promote Enantioselective Pictet-Spengler Cyclization by Stabilizing Every Intermediate and Transition State in the Carboxylic Acid-Catalyzed Reaction. *J Am Chem Soc* **2017**, *139*, 12299-12309.
27. Ammann, Stephen E.; Brizgys, Gediminas J.; Cassidy, James S.; Chin, Elbert; Chou, Chienhung; et al. **2021**, Patent WO2021081207 A1
28. An, J.; Ma, X.; Luo, S.; Weng, C.; Ding, Y.; Ling, C.; Szostak, M., Reductive Deuteration of Aromatic Esters for the Synthesis of  $\alpha,\alpha$ -Dideuterio Benzyl Alcohols Using D<sub>2</sub>O as Deuterium Source. *Synlett* **2020**, *32*, 51-56.
29. Neuvonen, A. J.; Földes, T.; Madarász, Á.; Pápai, I.; Pihko, P. M., Organocatalysts Fold To Generate an Active Site Pocket for the Mannich Reaction. *ACS Catal* **2017**, *7*, 3284-3294

## 9. NMR spectra for new substrates and intermediates

### Methyl 3-(but-3-en-1-yloxy)-4-cyanobenzoate

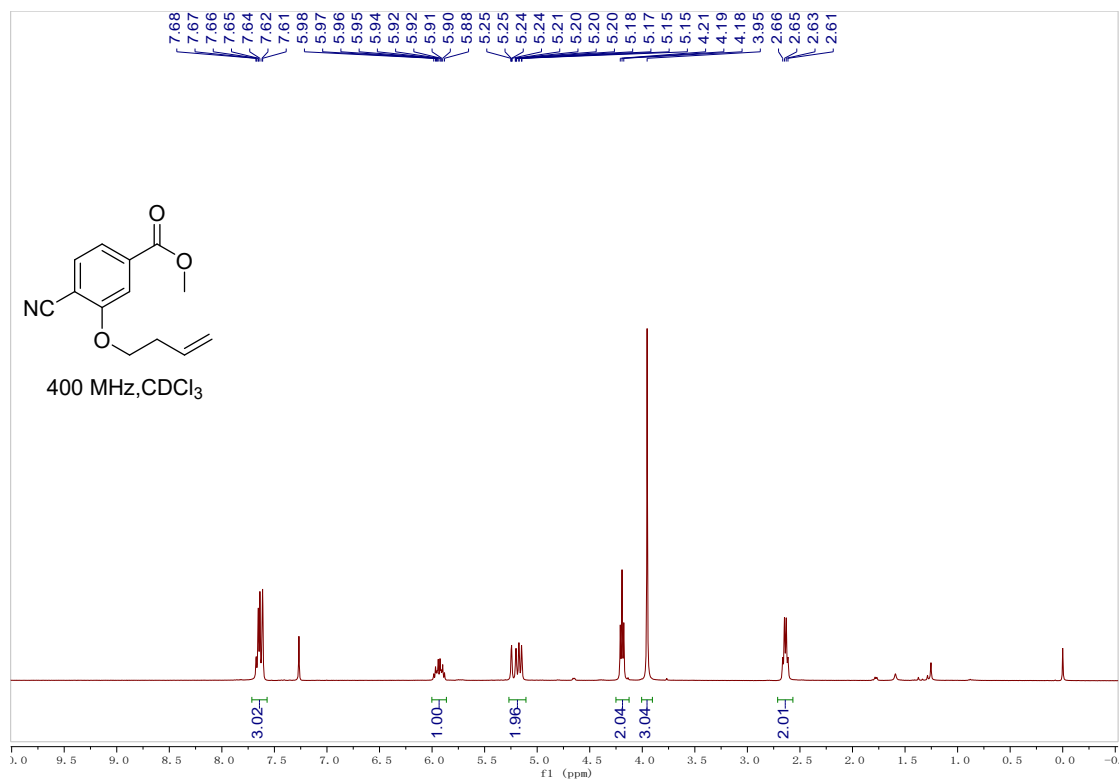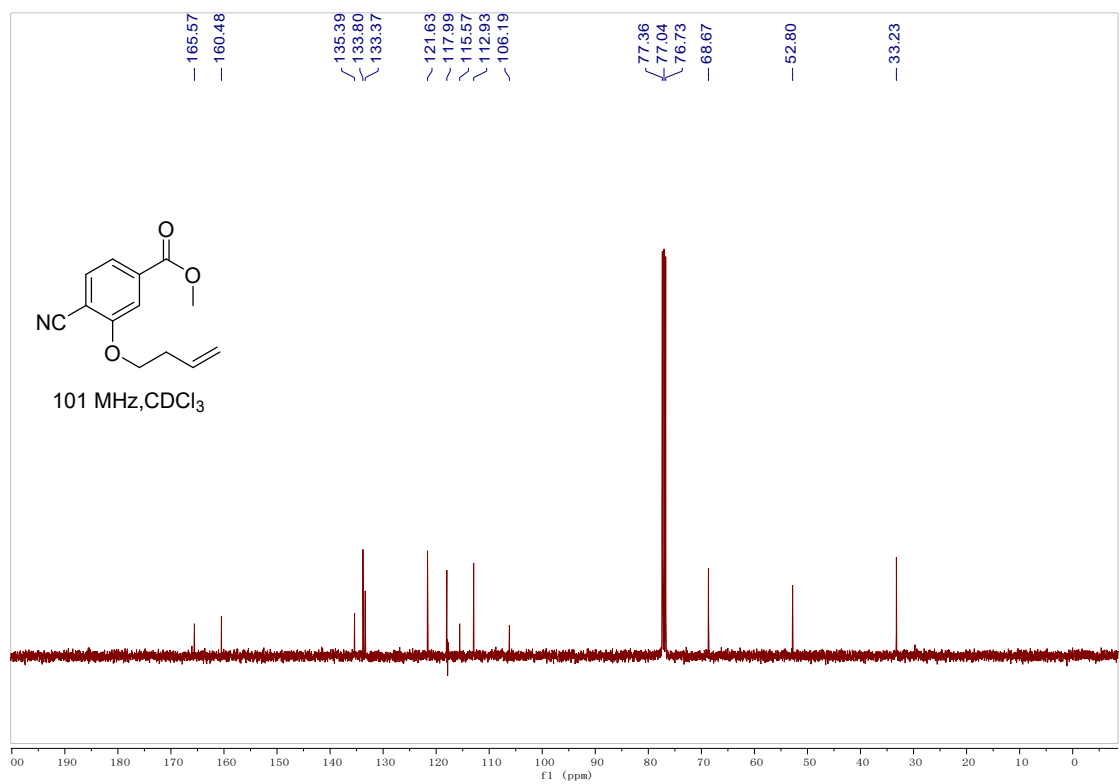

**Methyl 4-cyano-3-(prop-2-yn-1-yloxy)benzoate**

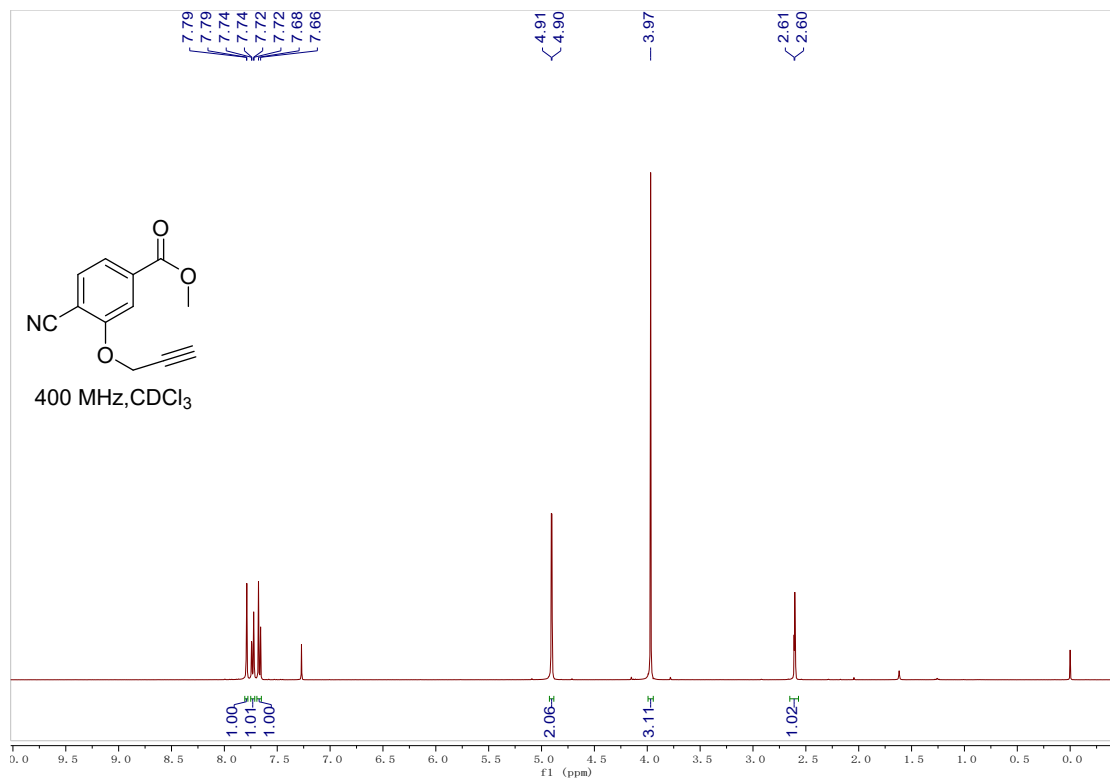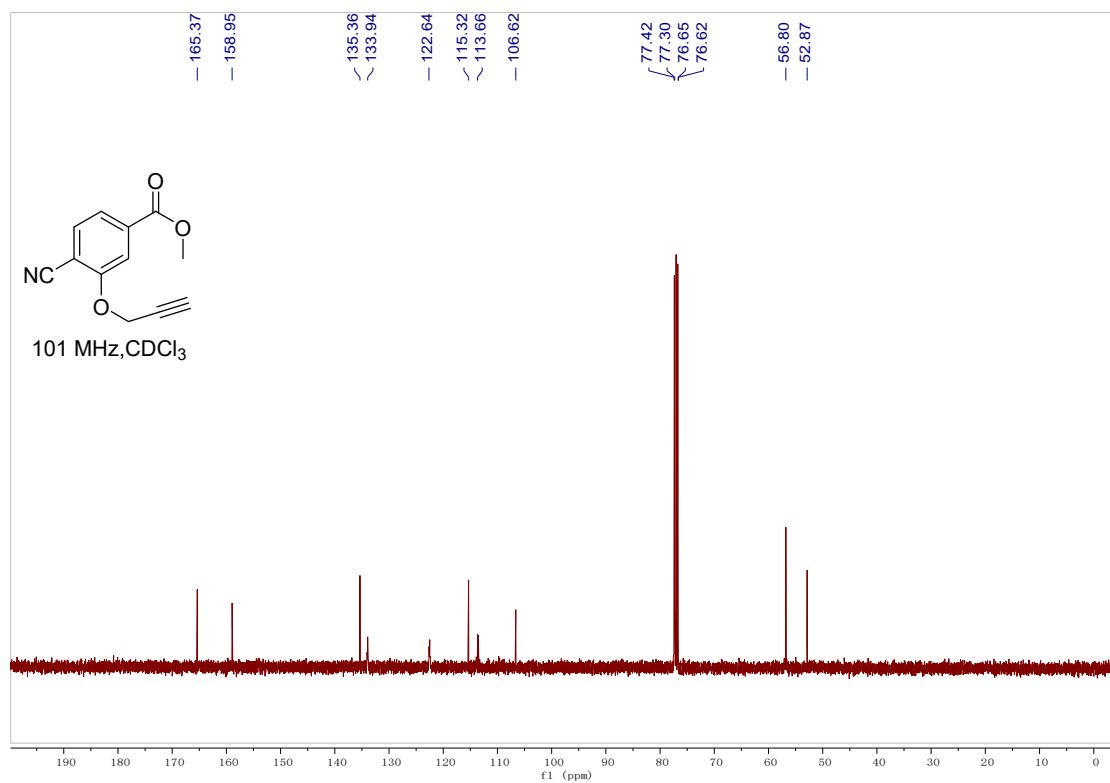

**Methyl 4-cyano-3-((5-cyanopentyl)oxy)benzoate**

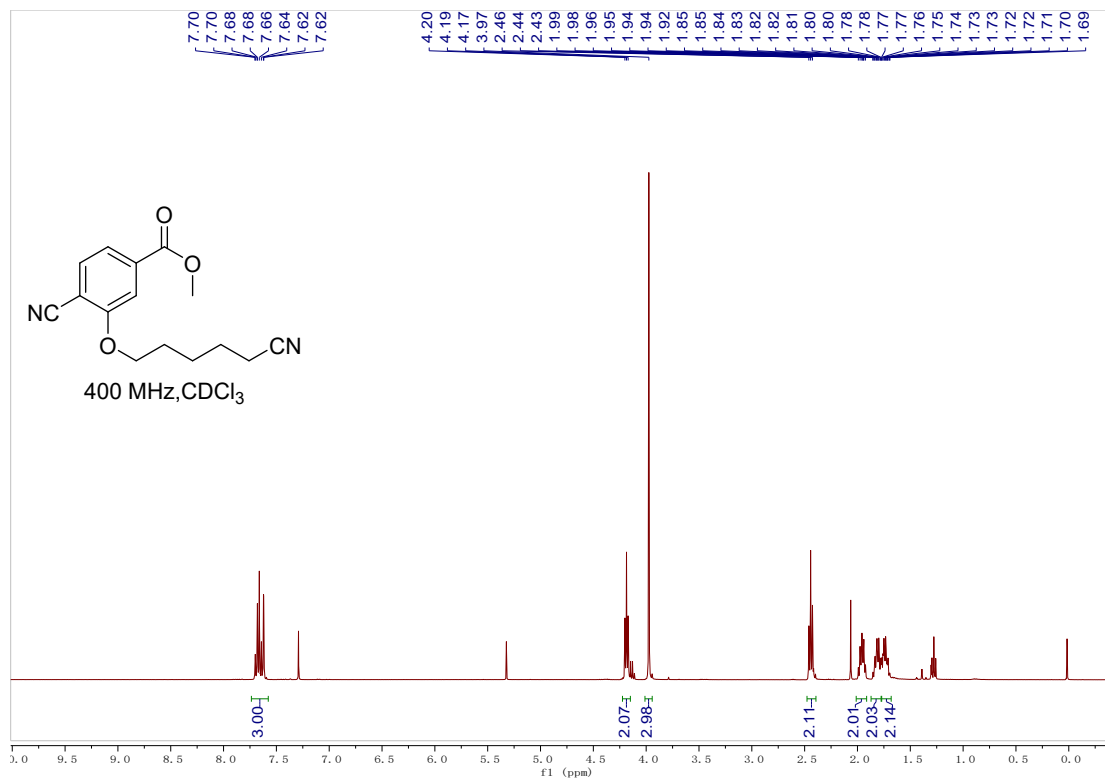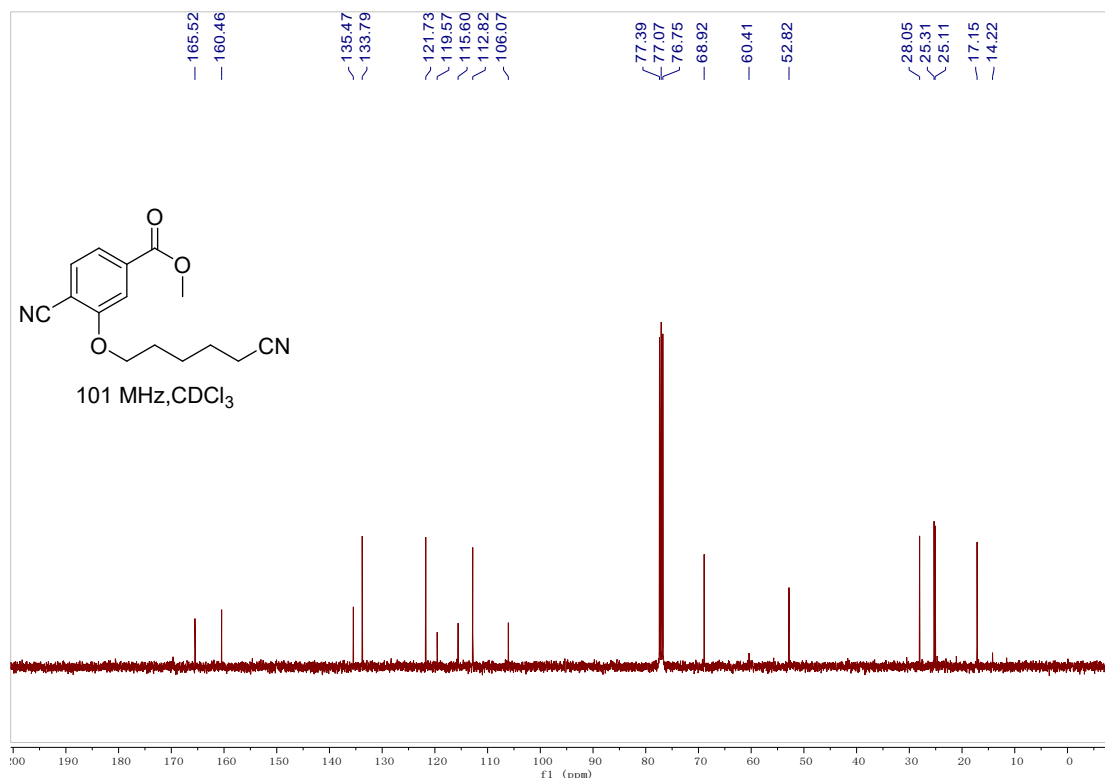



# Methyl 4-cyano-3-(2-fluoroethoxy)benzoate

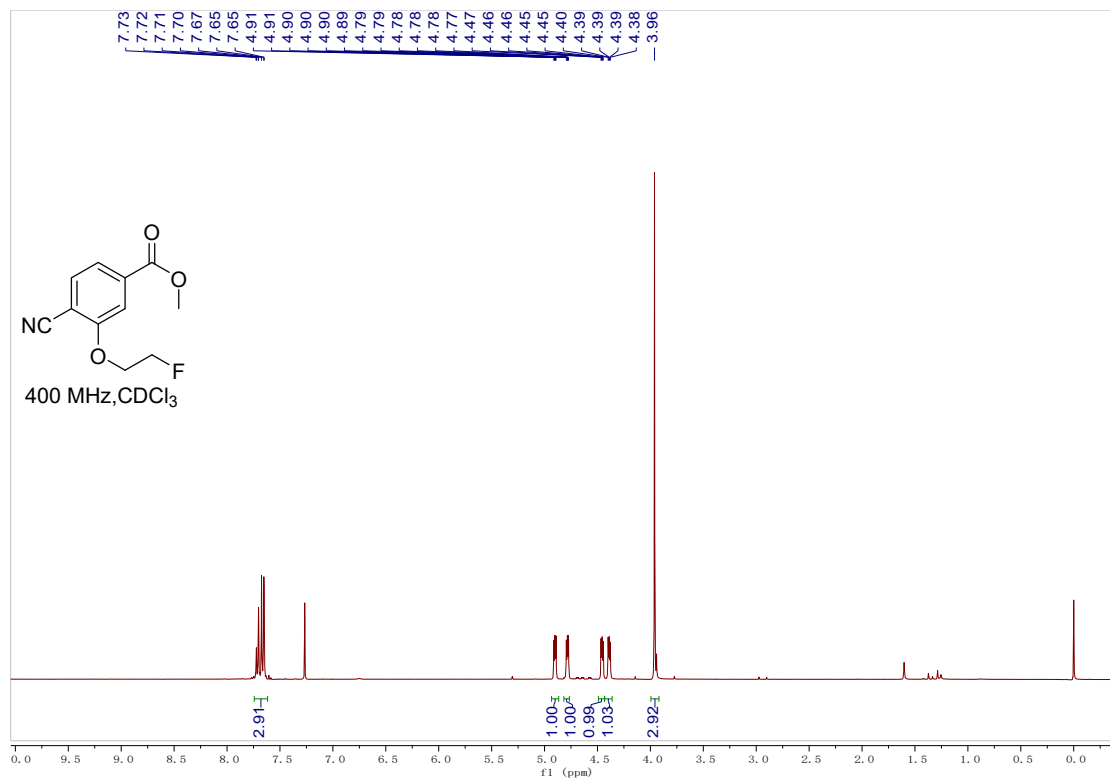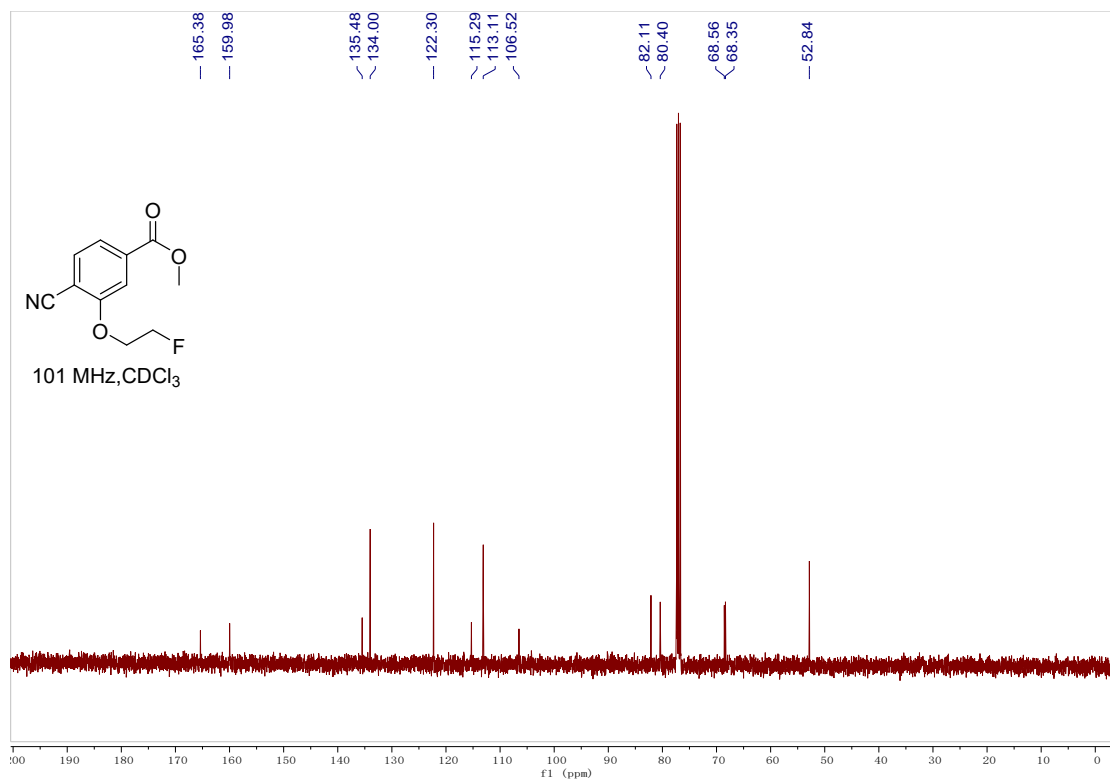

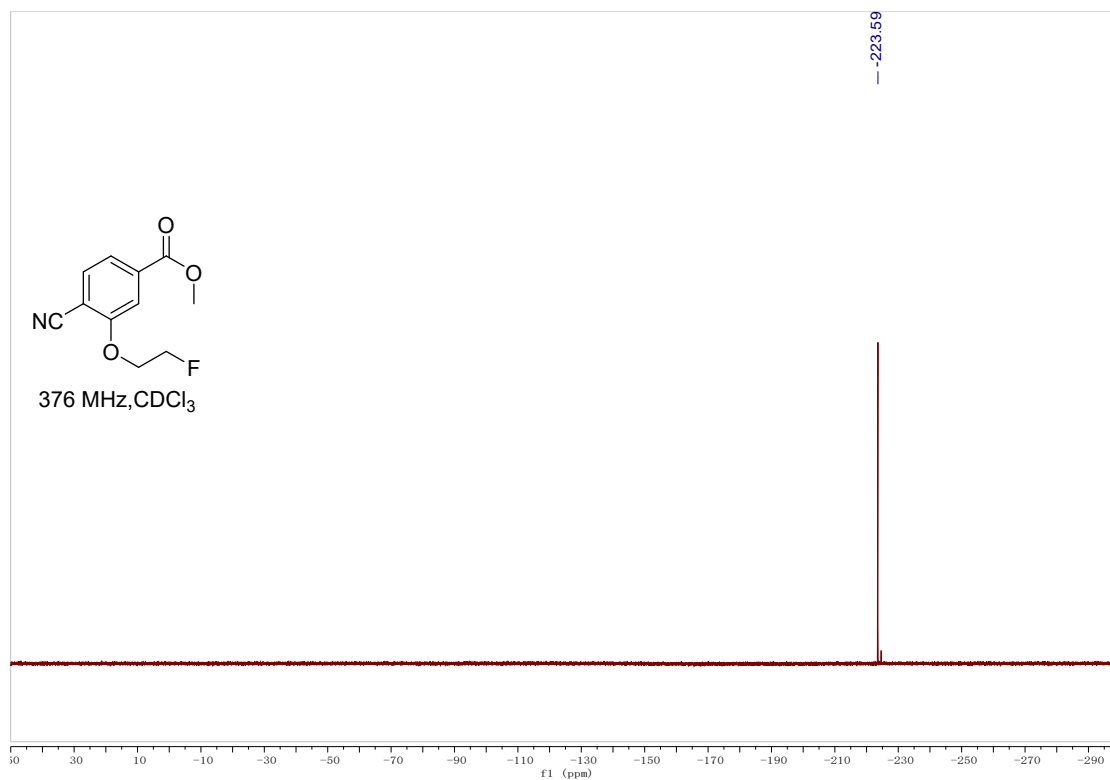

**Methyl 4-cyano-3-(4-(methoxycarbonyl)phenoxy)benzoate**

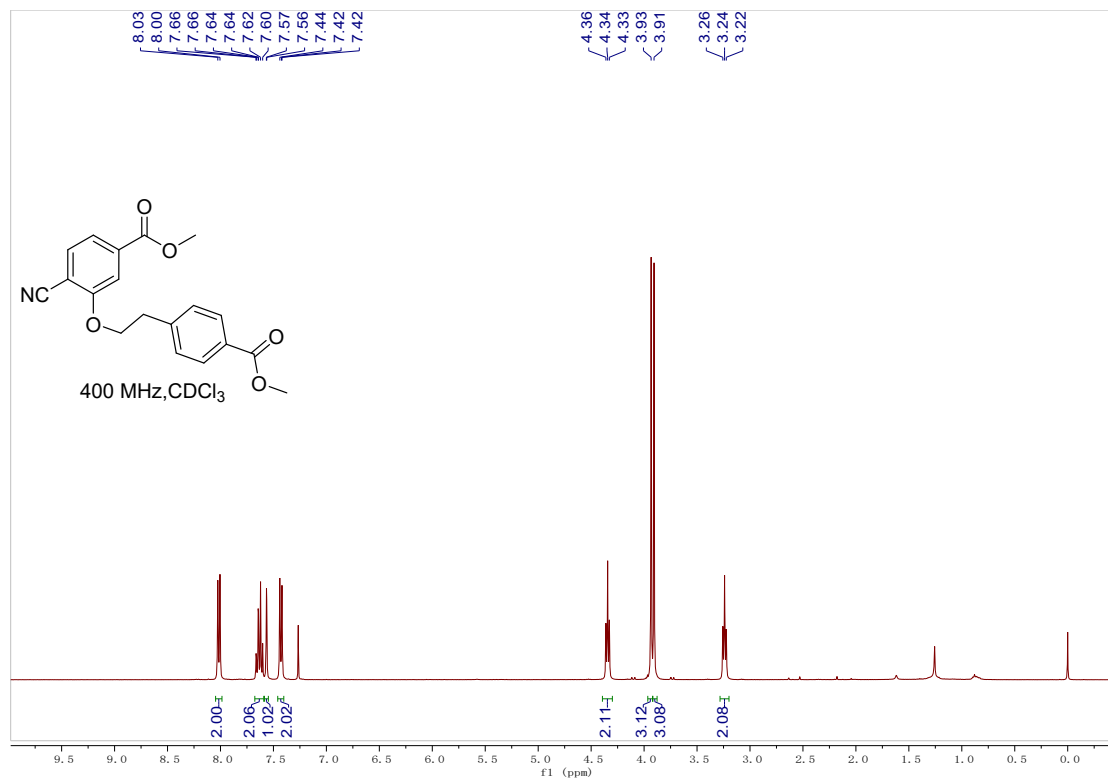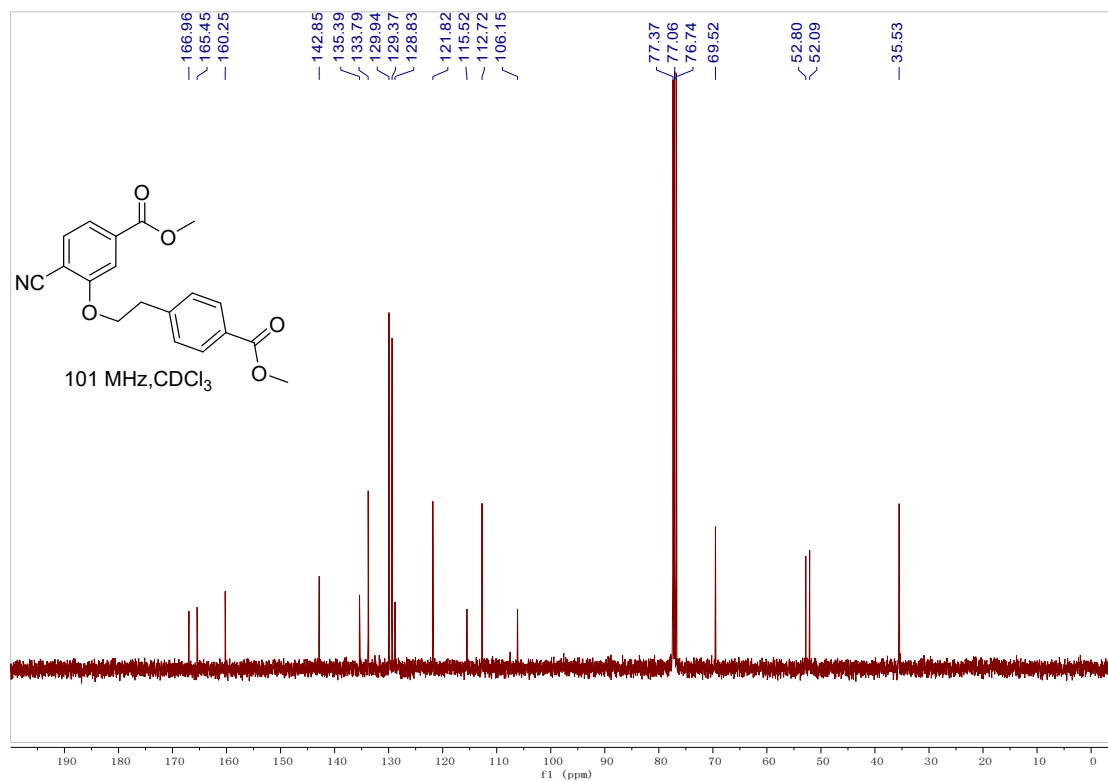

# Methyl 4-(butyryloxy)benzoate

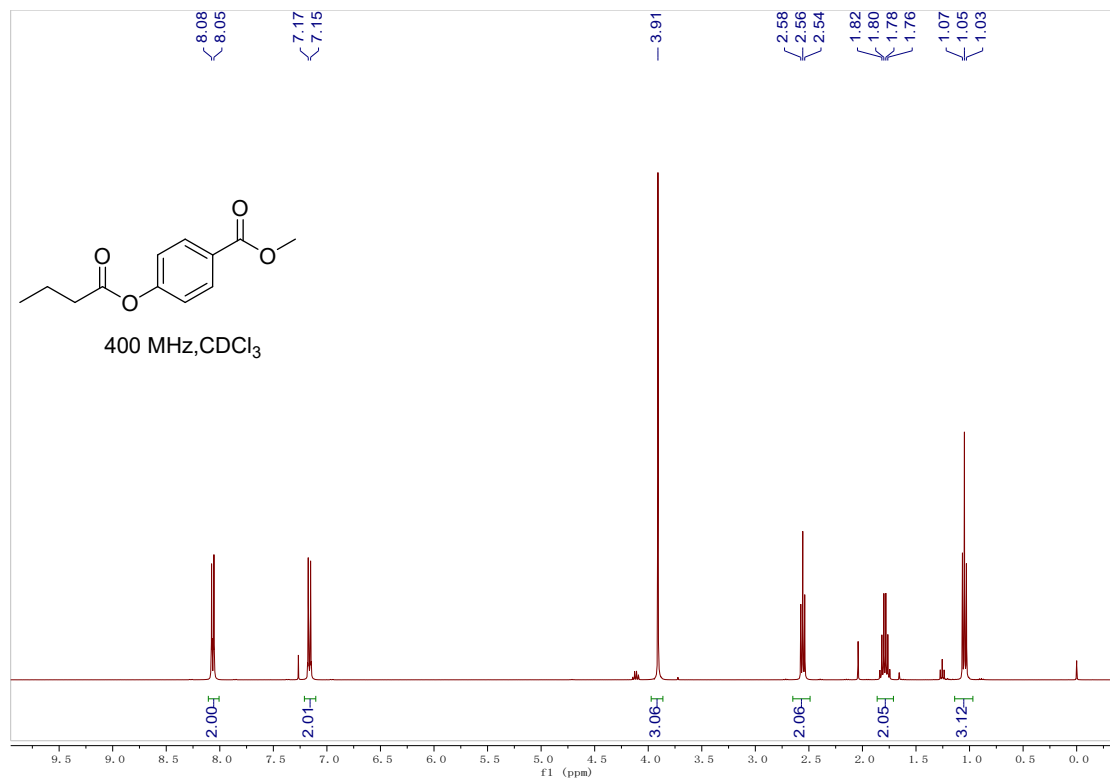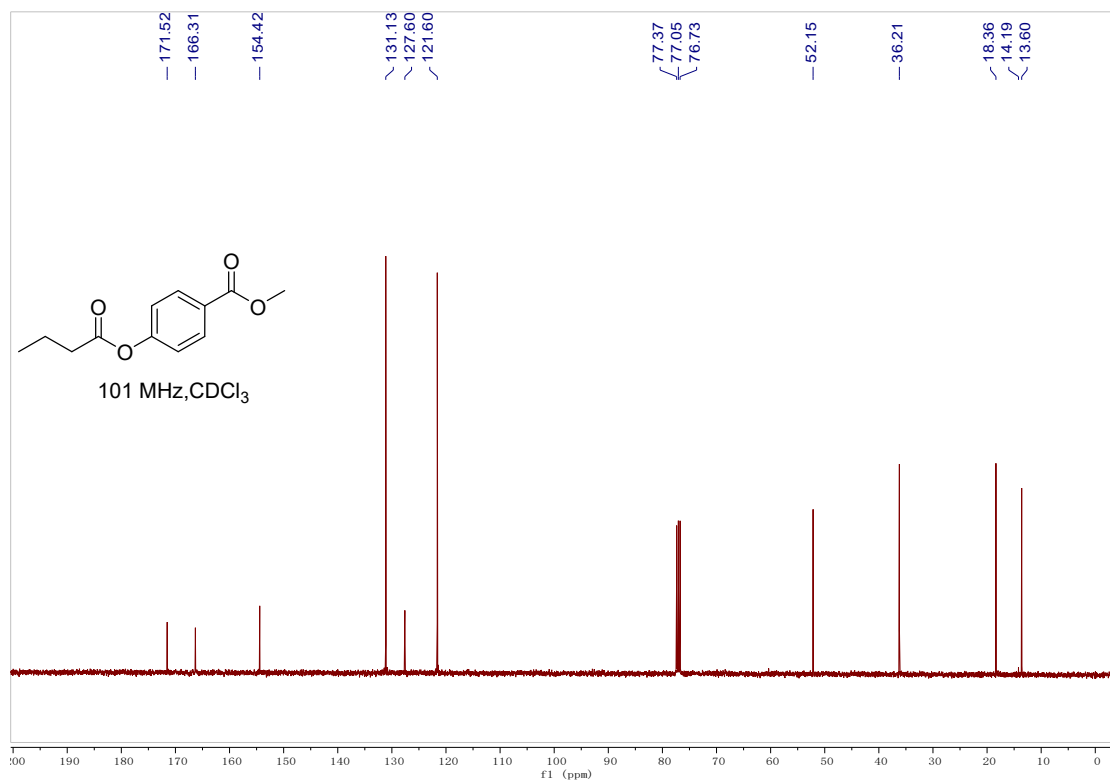

# Methyl 5-acetamido-2-hydroxybenzoate

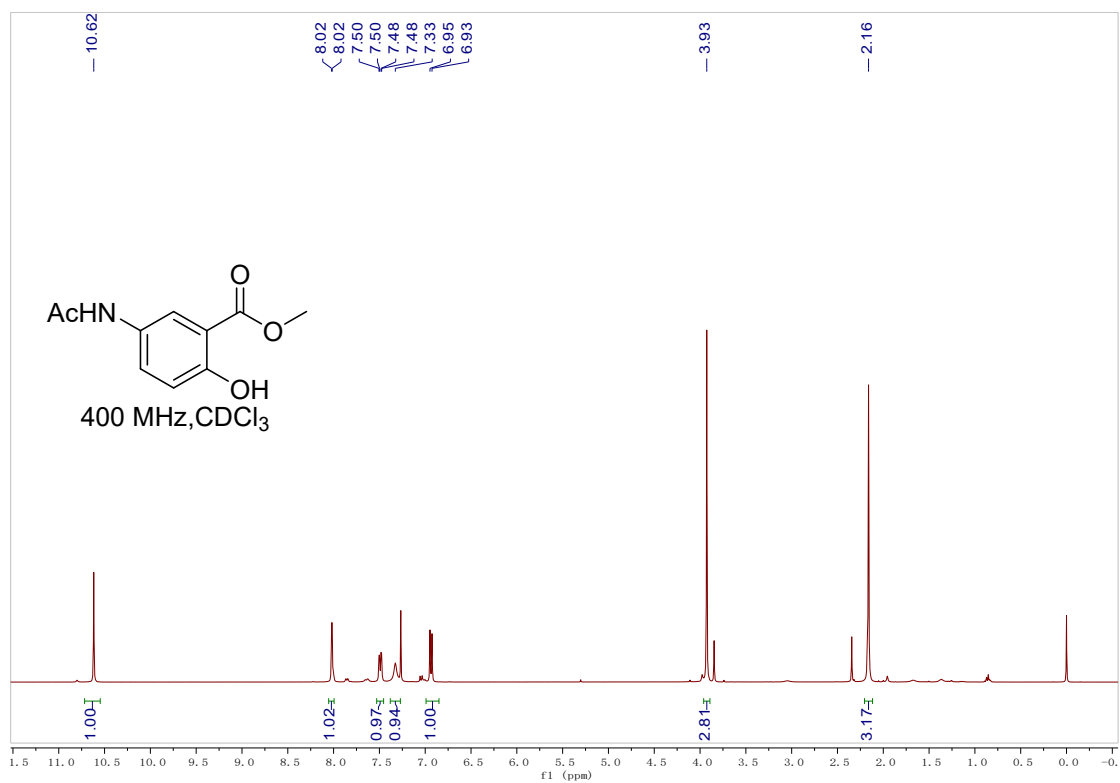

### Methyl 5-acetamido-2-(2-chloroethoxy)benzoate

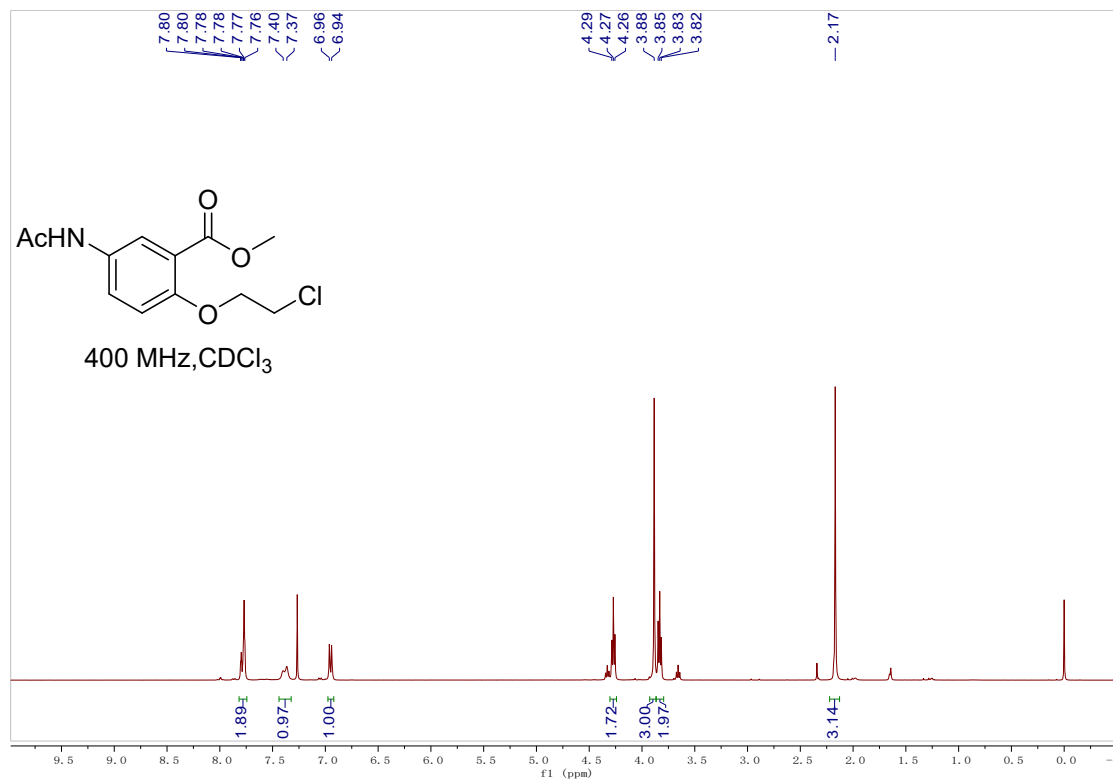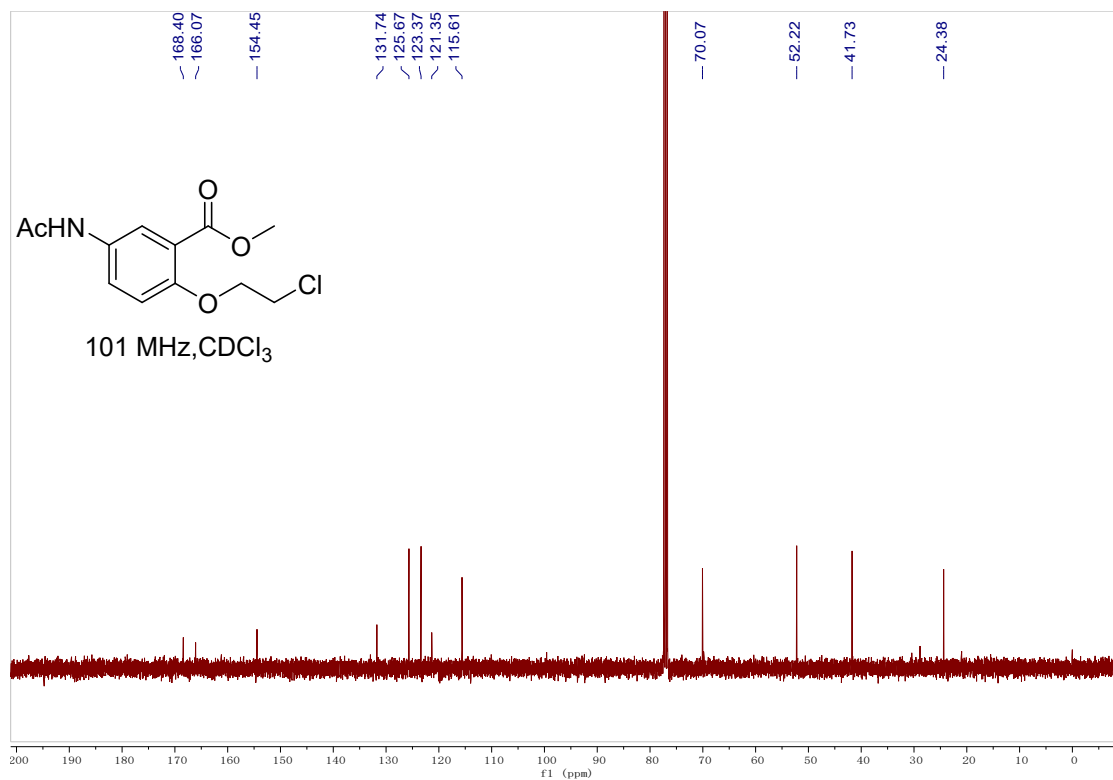

### 4-Biphenylcarboxaldehyde (E)

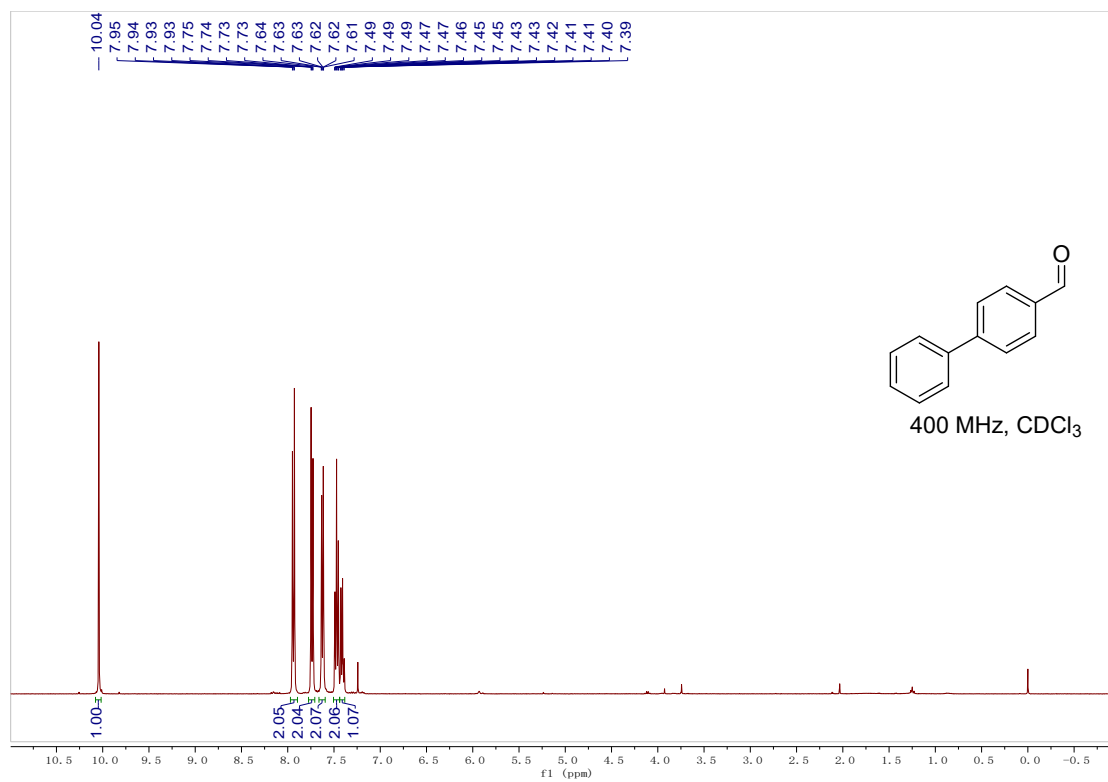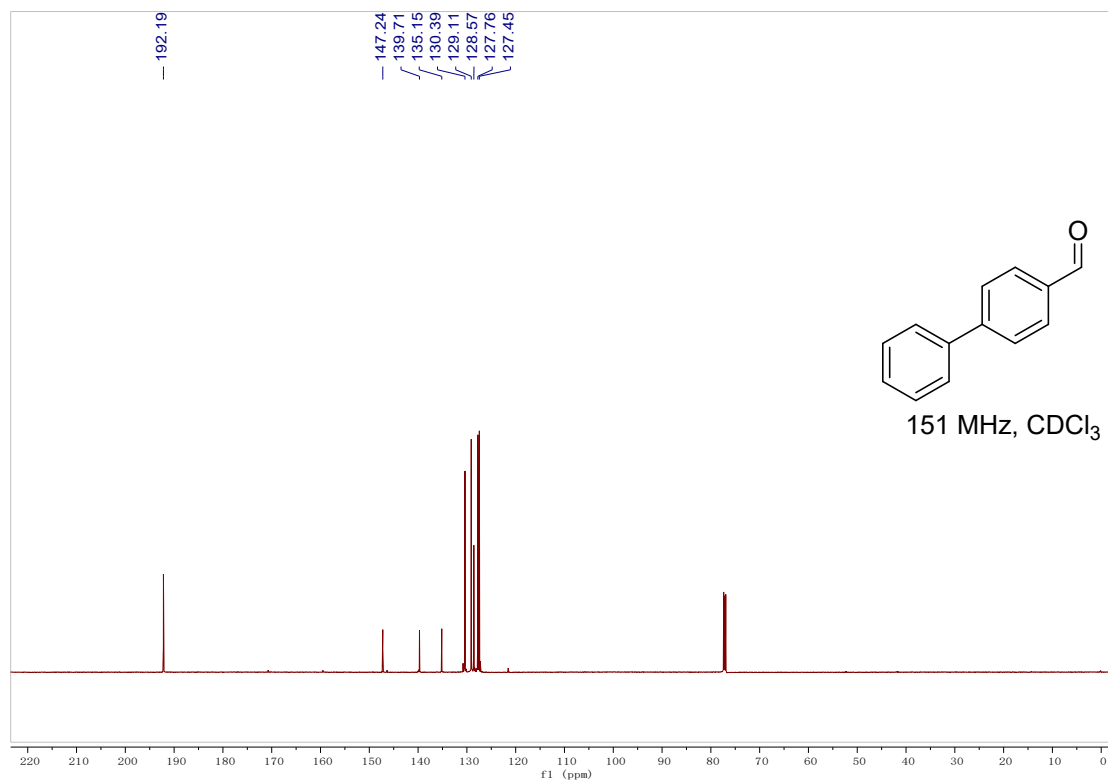

### Dimethyl 4,4'-(1,2-dihydroxyethane-1,2-diyl)dibenzoate (B)

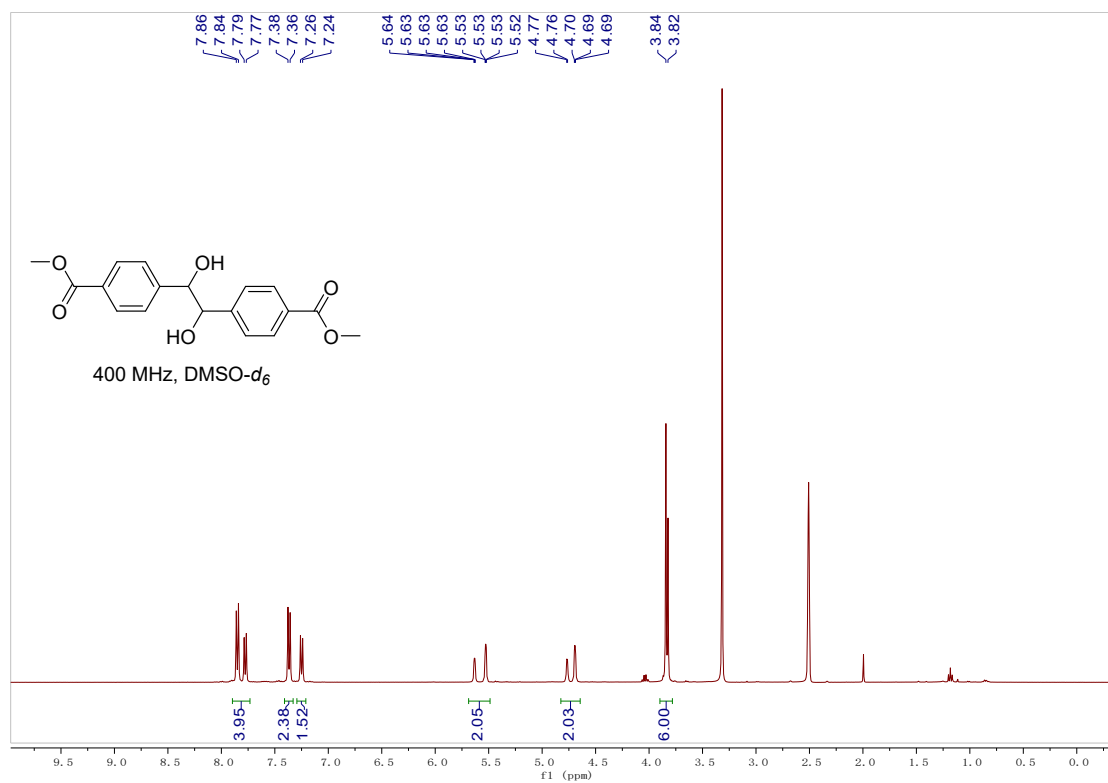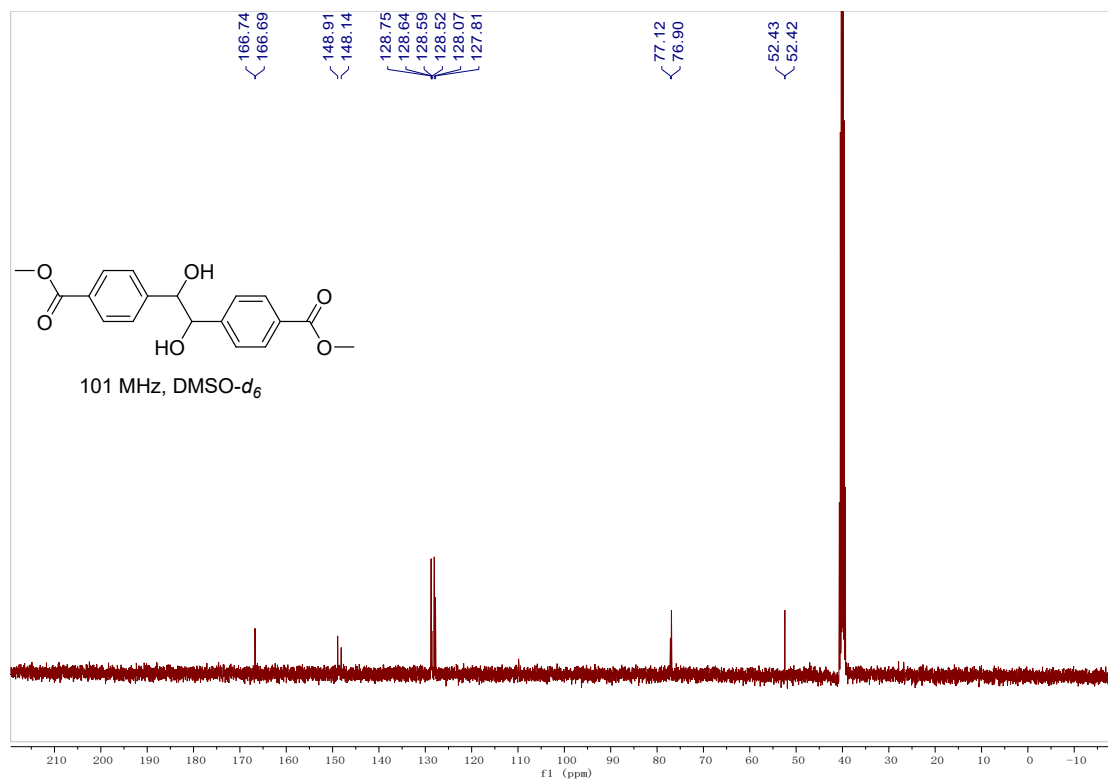



## 10. NMR spectra for products

### Methyl 4-(hydroxymethyl)benzoate (1a)

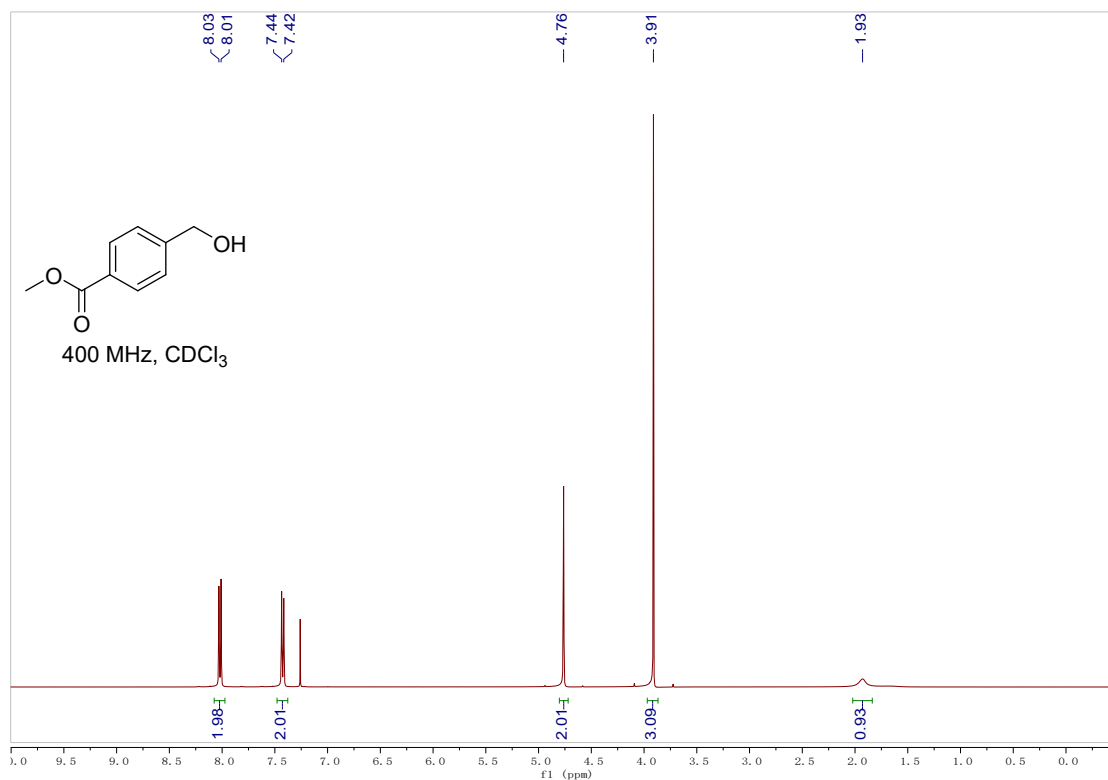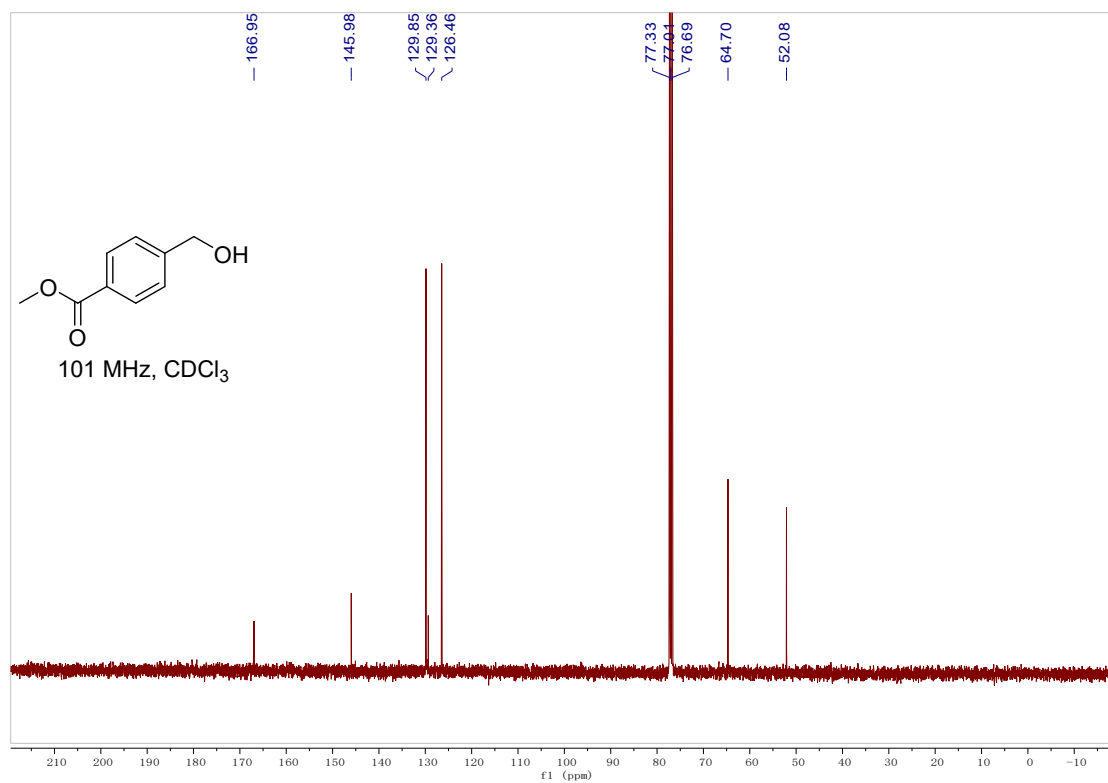

### Isobenzofuran-1(3H)-one (1b)

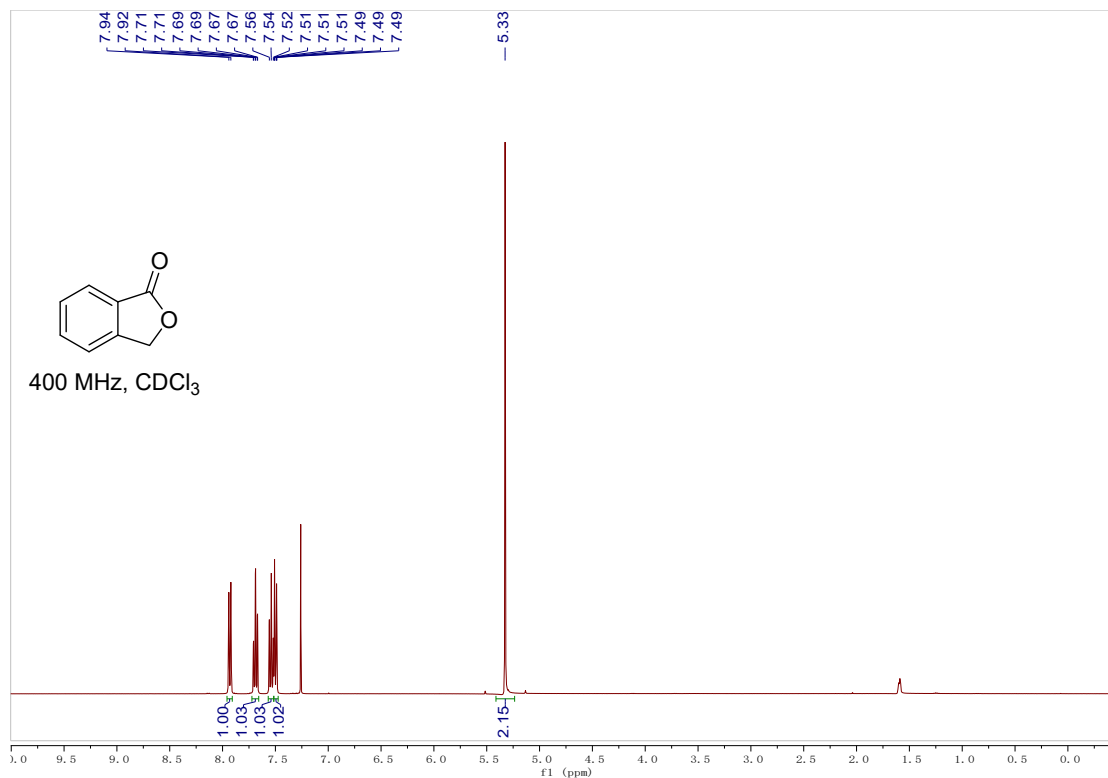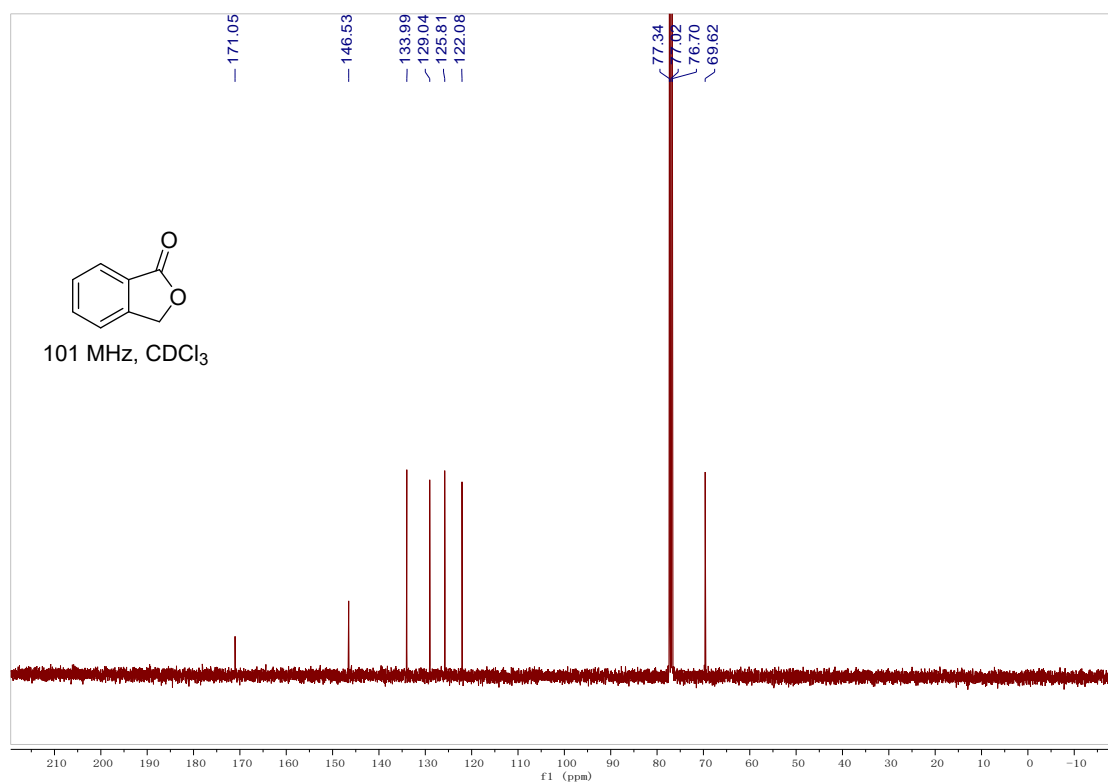

### 4-(Hydroxymethyl)benzonitrile (1c)

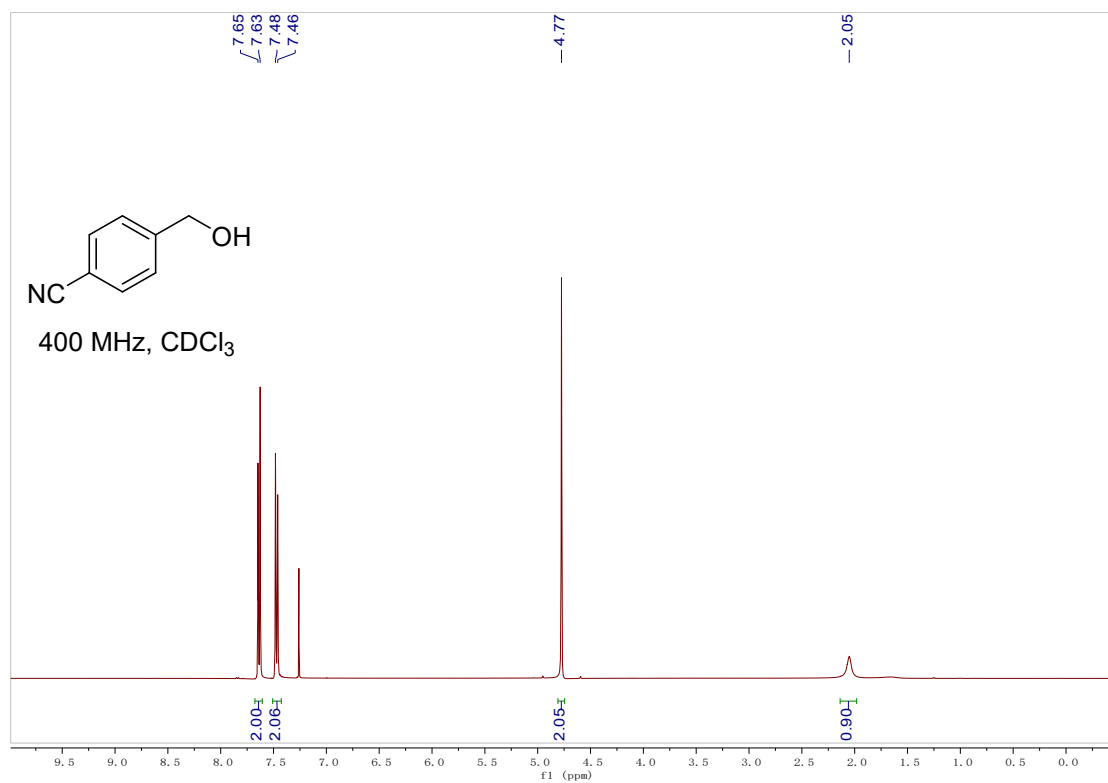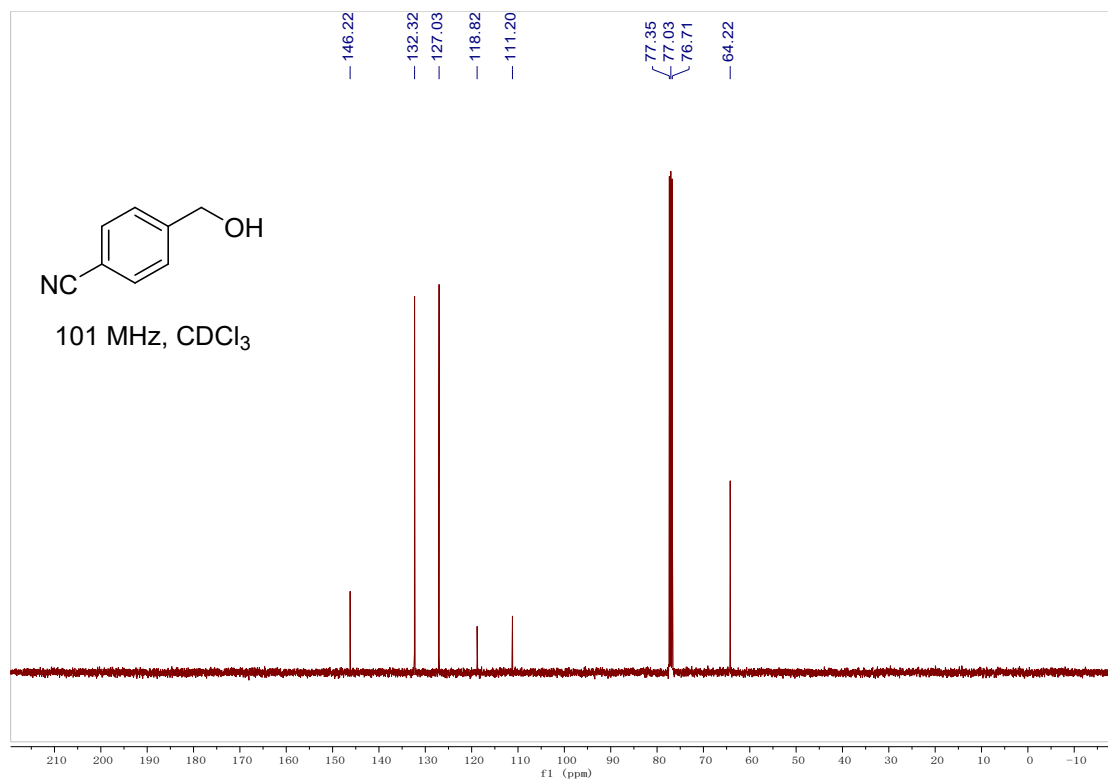

### 5-(Hydroxymethyl)isobenzofuran-1(3H)-one (1f)

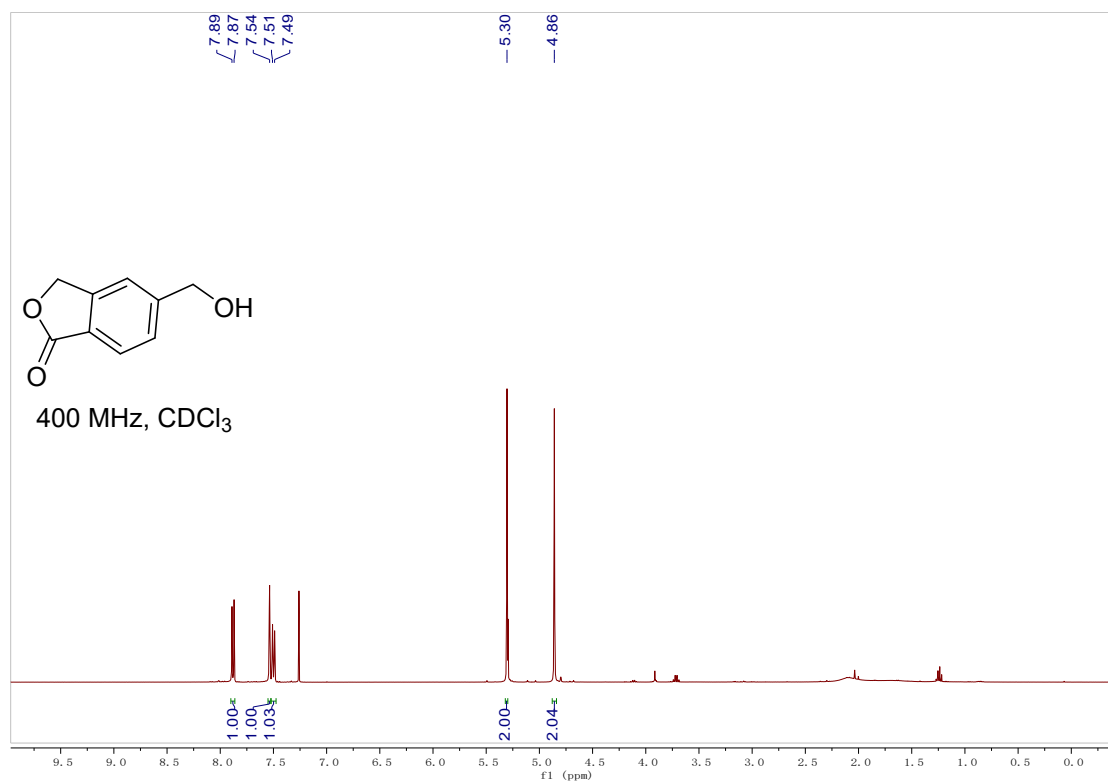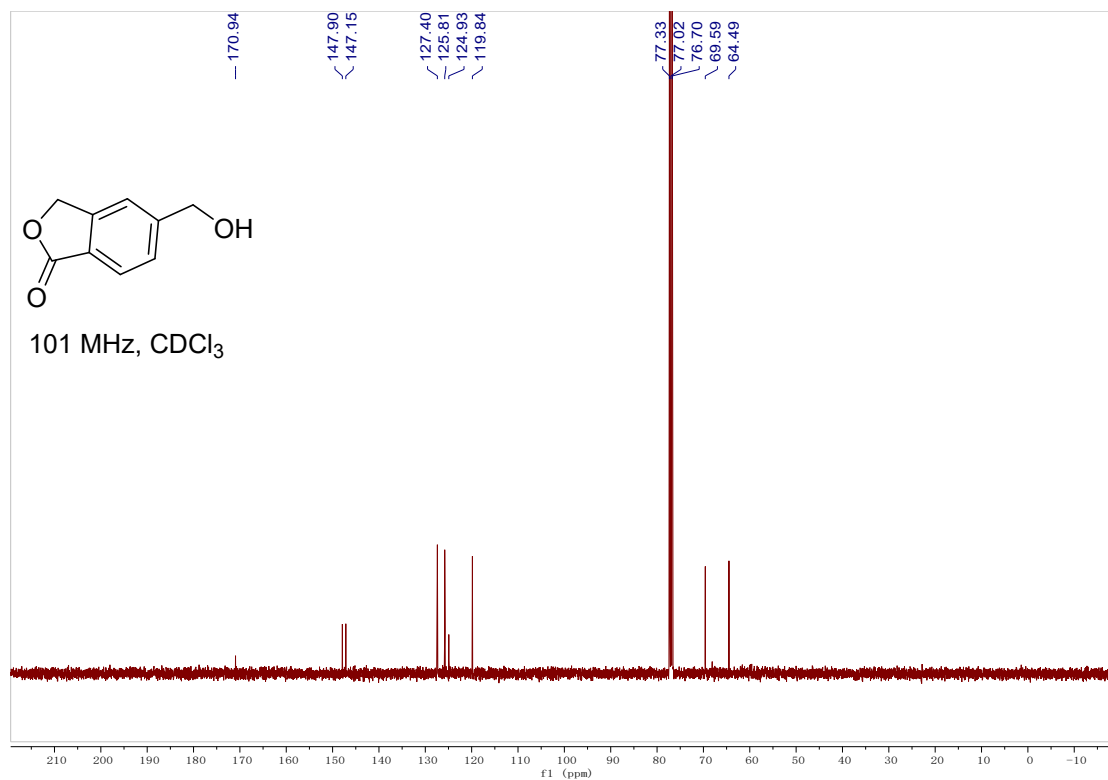

# Diethyl (4-(hydroxymethyl)phenyl)phosphonate (1g)

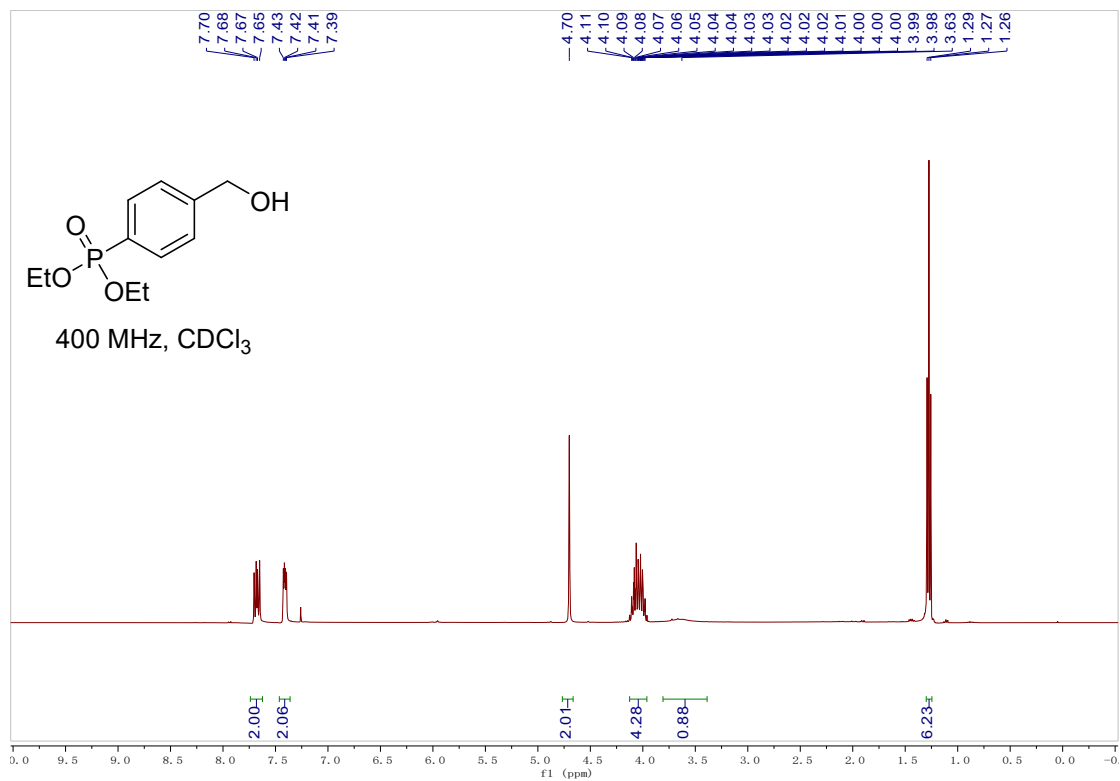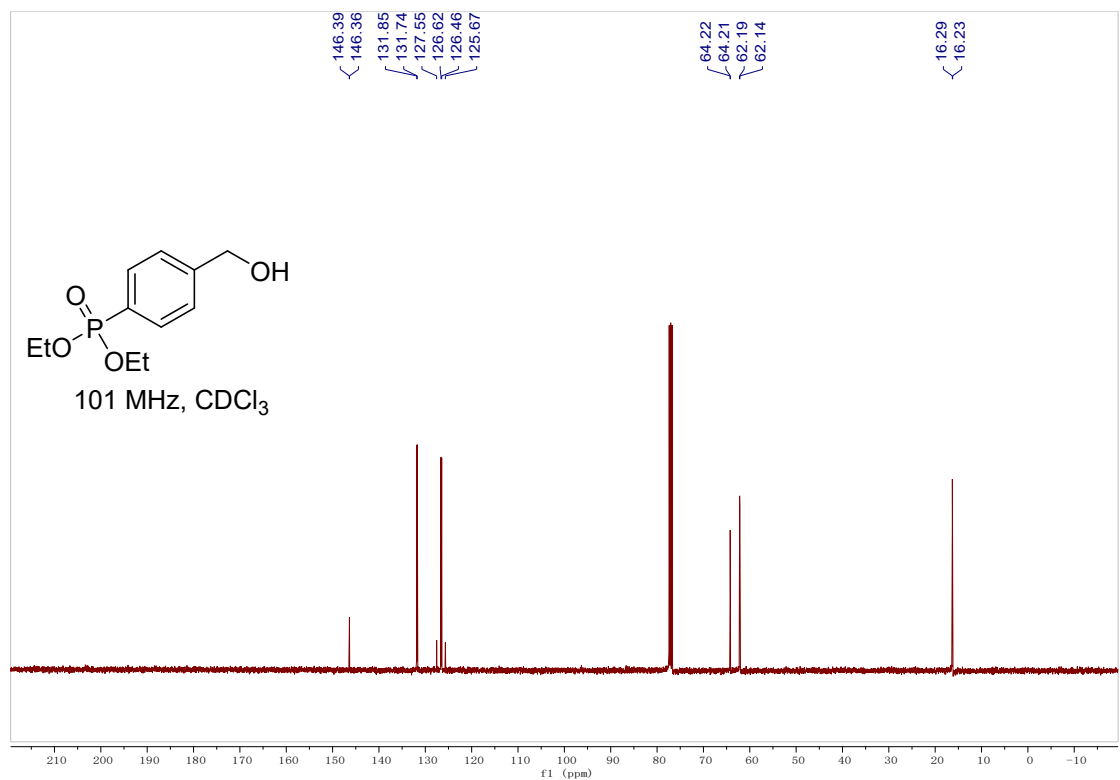

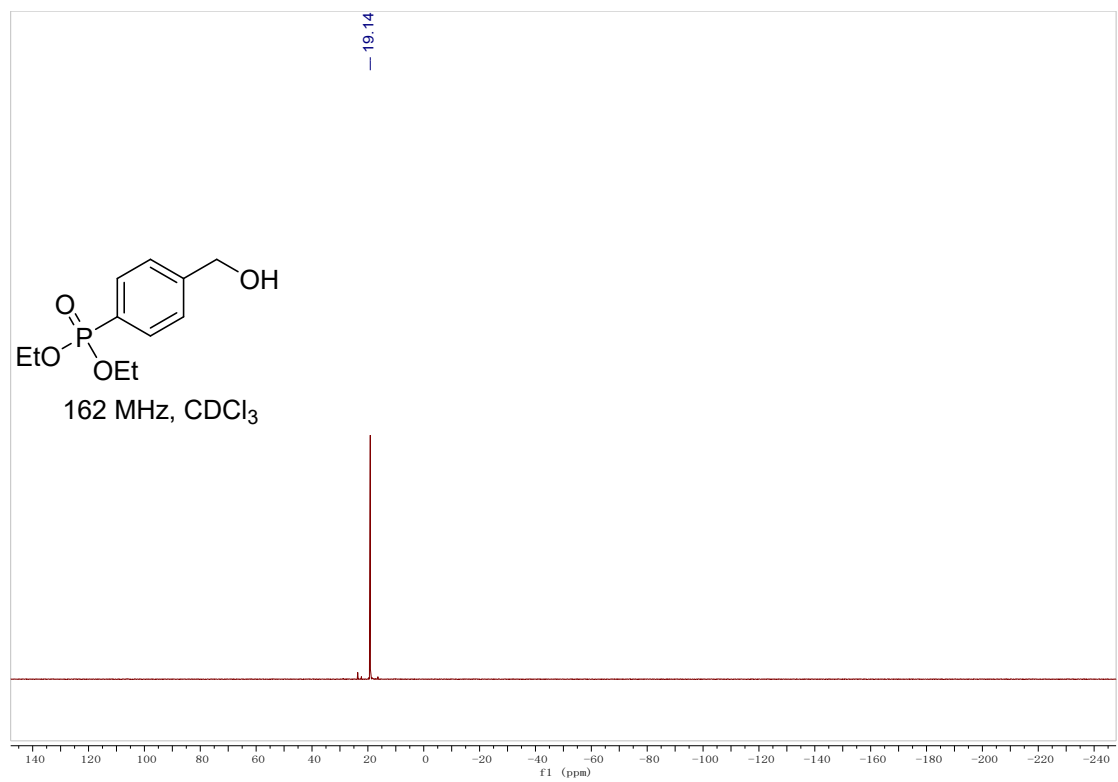

# Diphenyl (4-(hydroxymethyl)phenyl)phosphonate (1h)

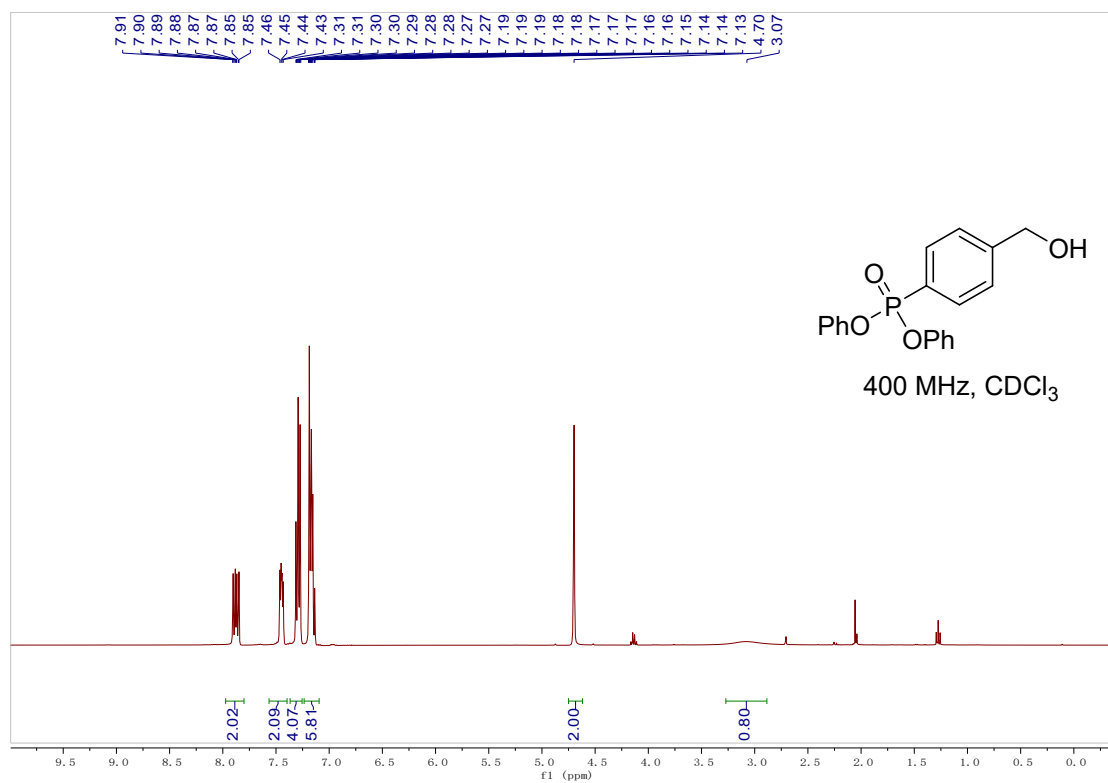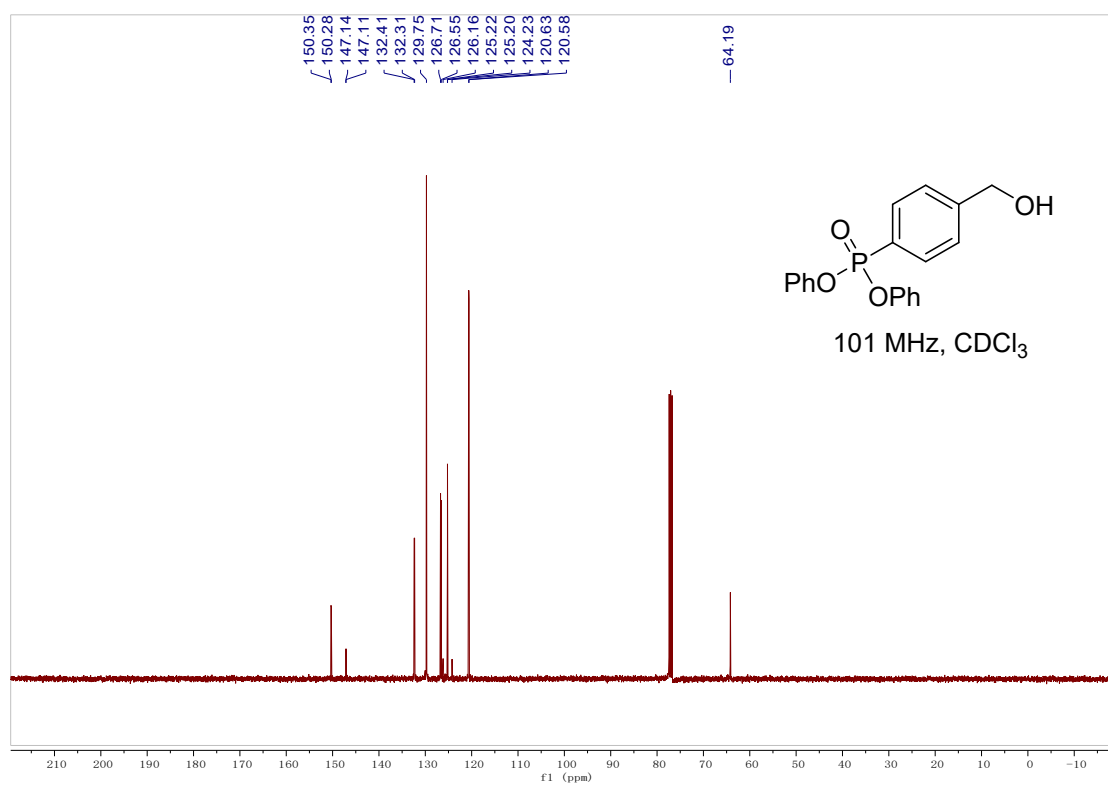

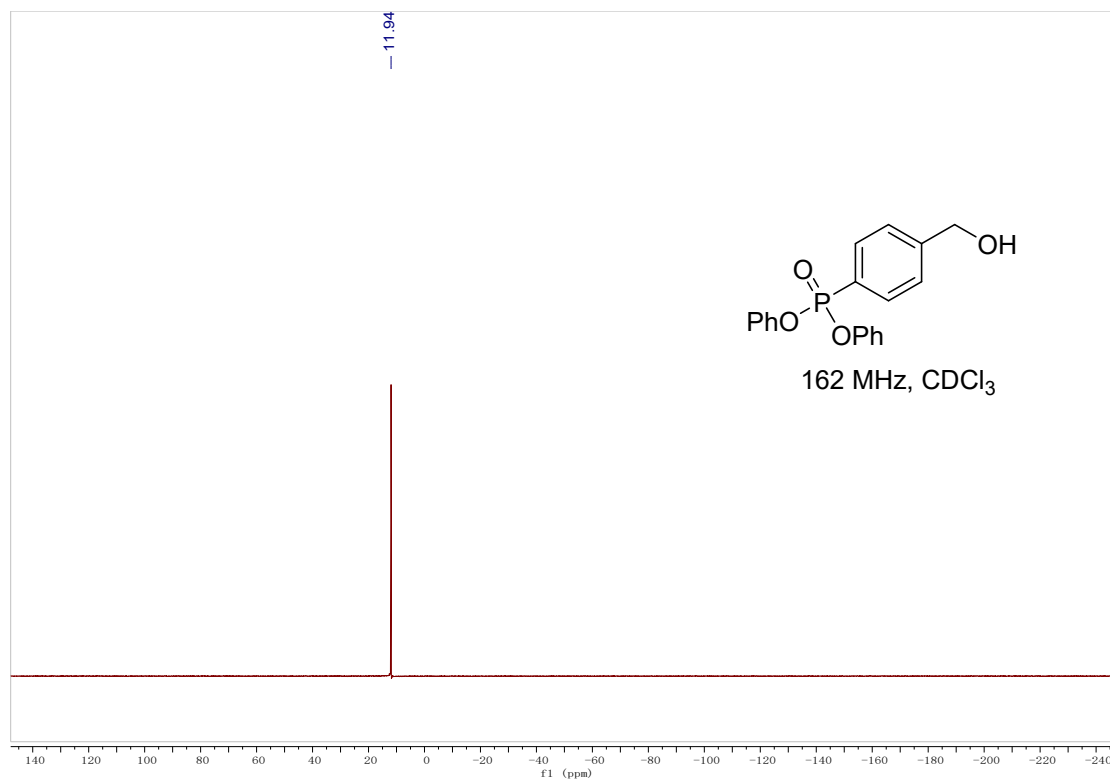



**(4-(hydroxymethyl)phenyl)diphenylphosphine oxide (1i)**

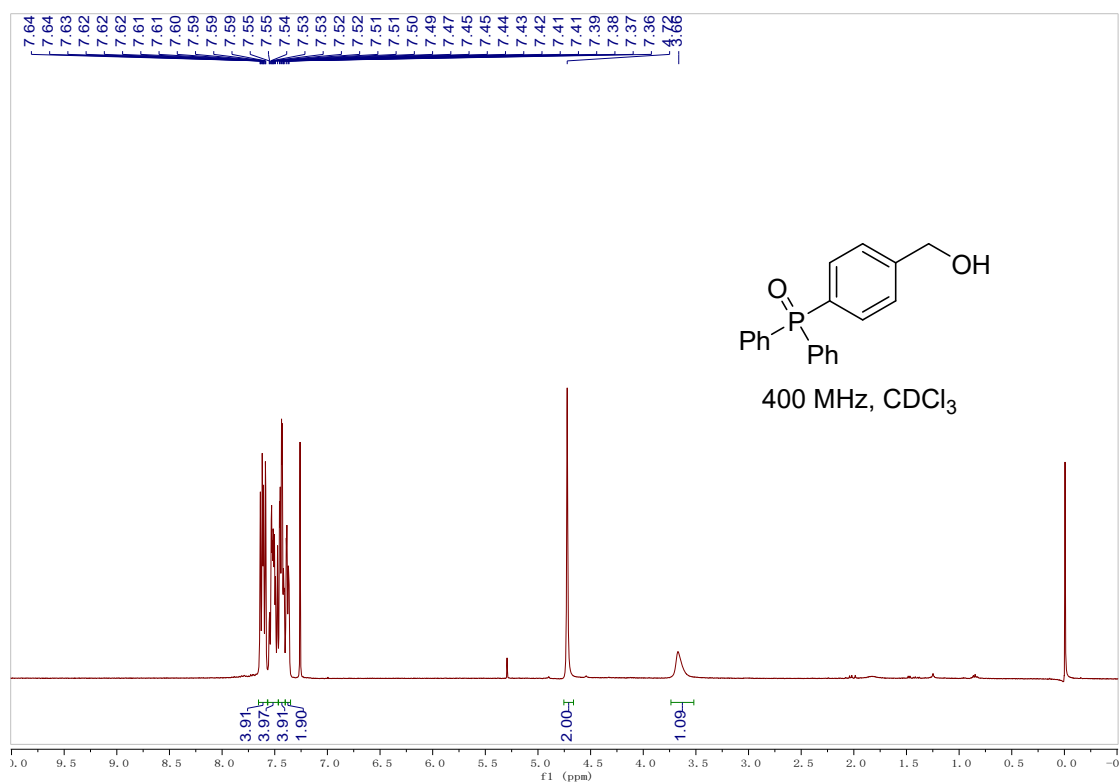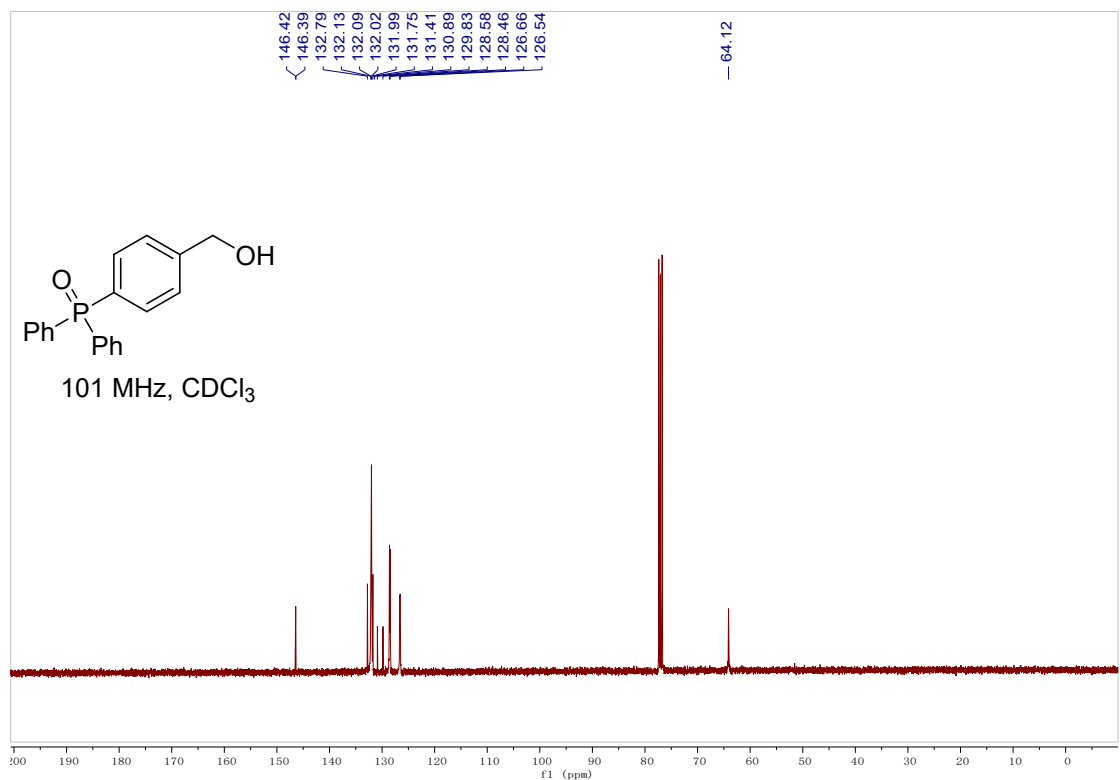

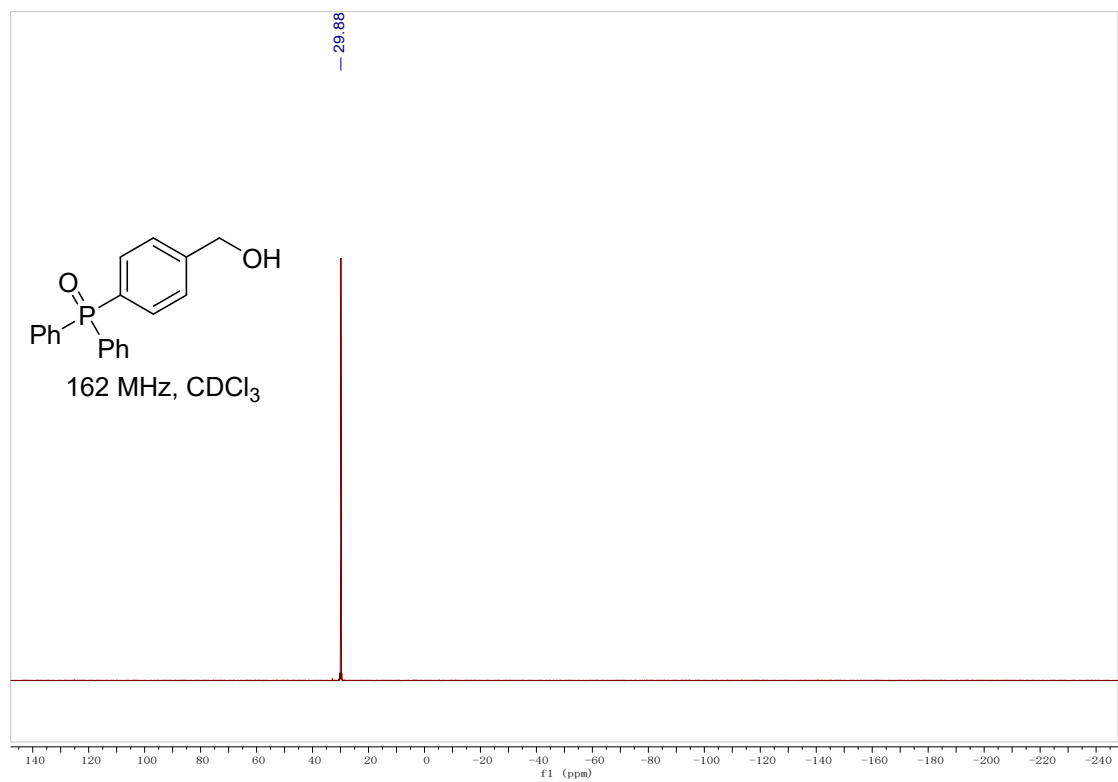

**(4-(4,4,5,5-Tetramethyl-1,3,2-dioxaborolan-2-yl)phenyl)methanol (1j)**

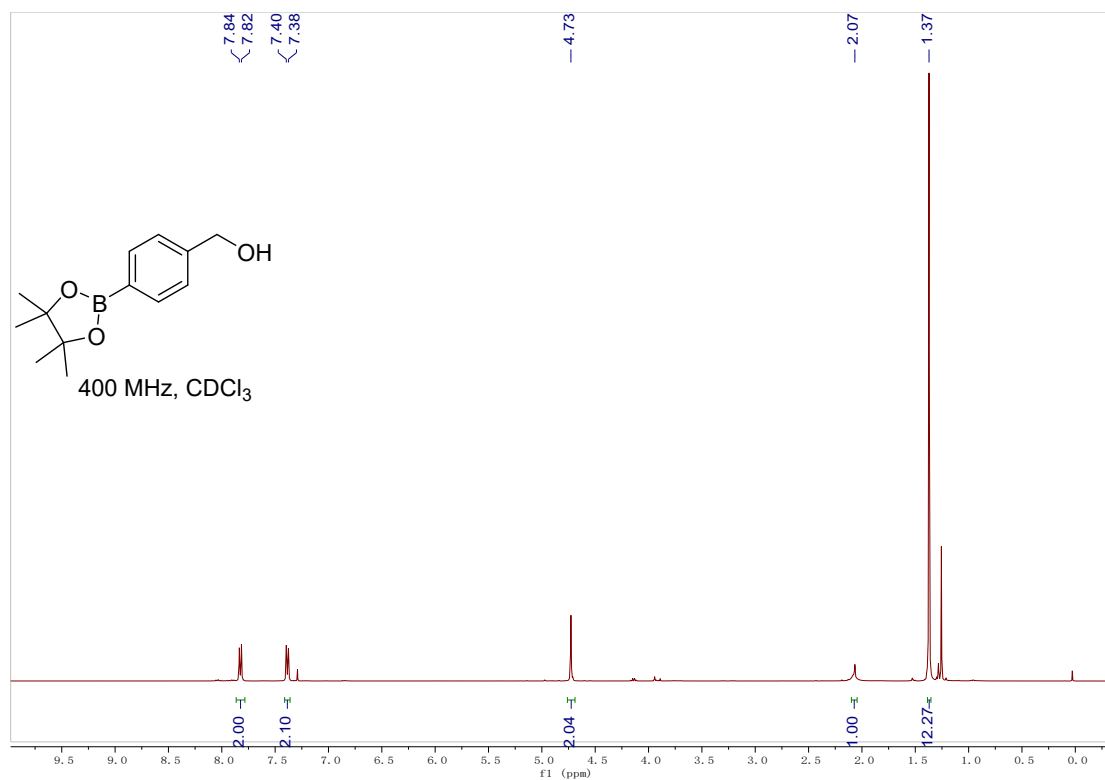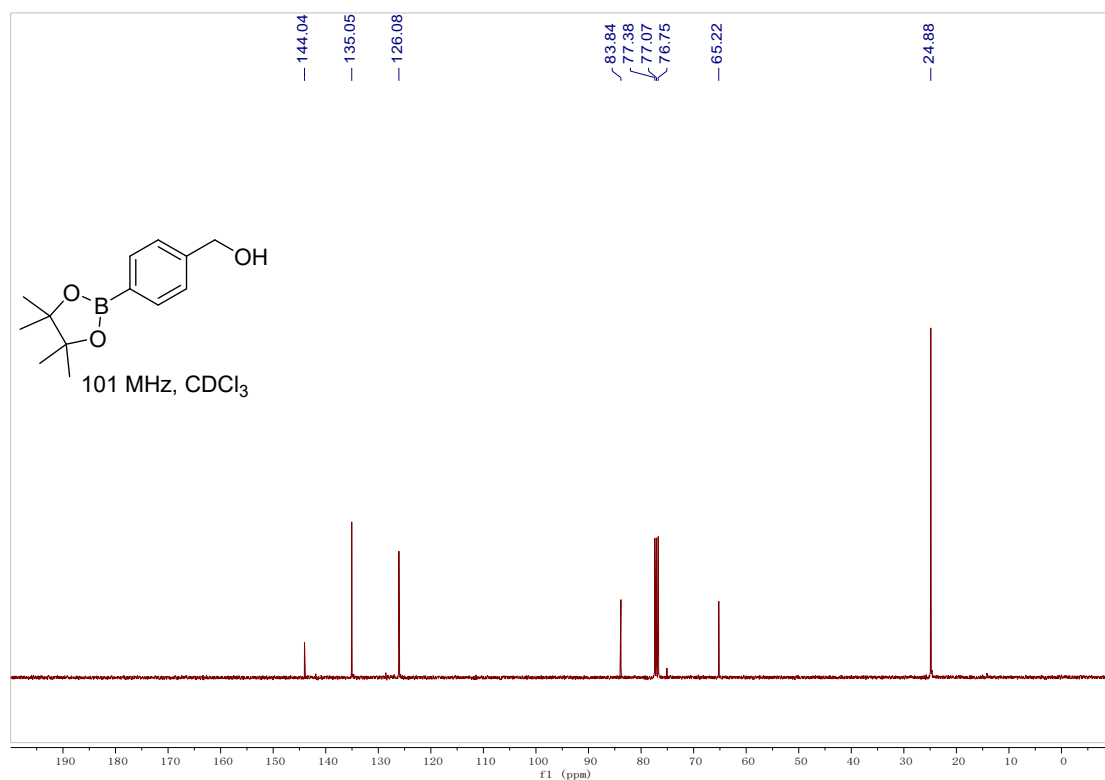

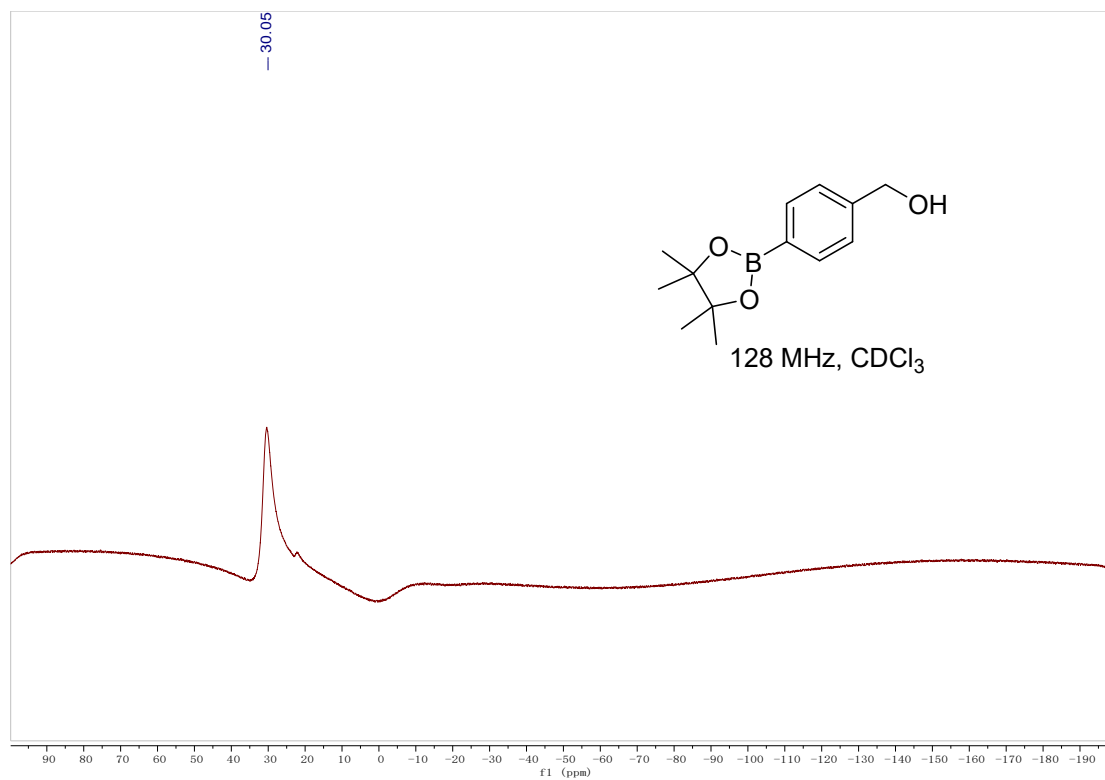

### 4-(hydroxymethyl)benzoic acid (1k)

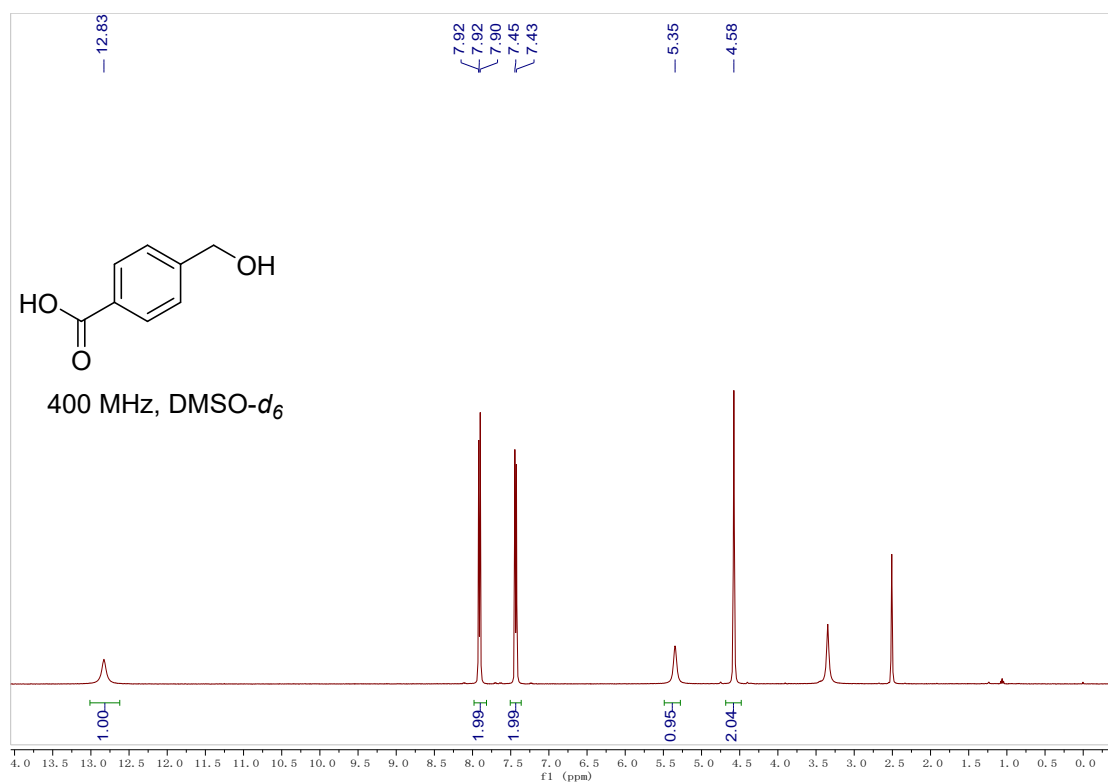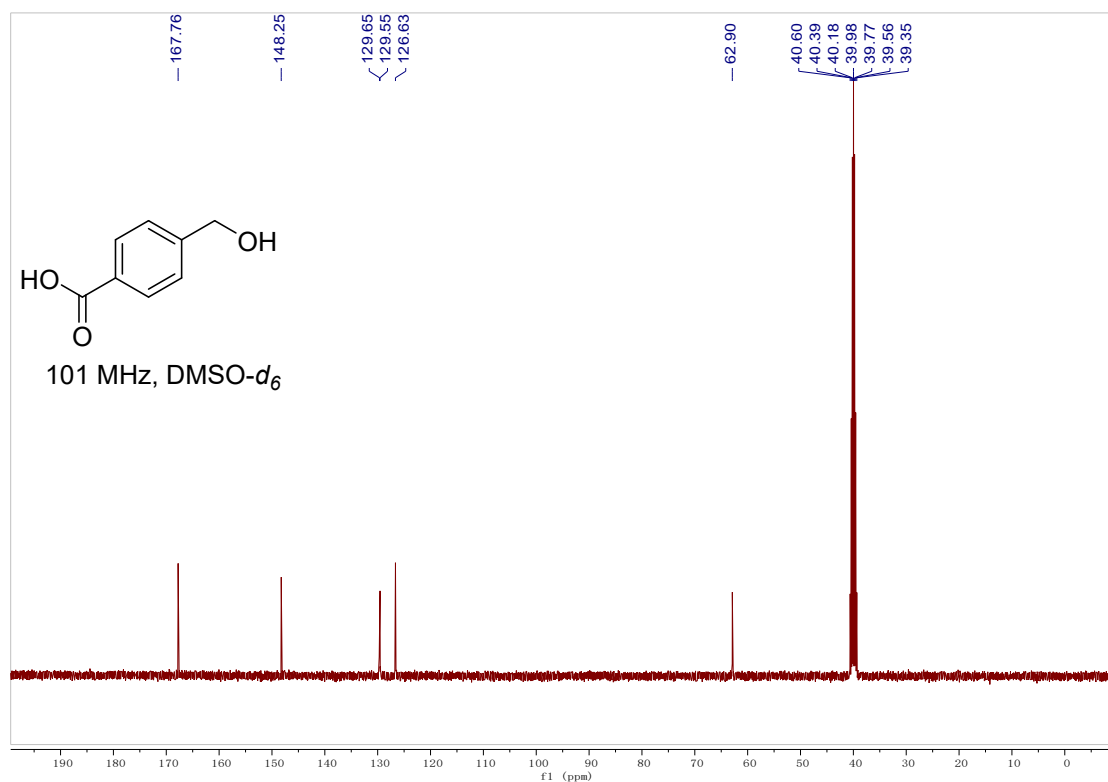

### Methyl 6-(hydroxymethyl)-2-naphthoate (11)

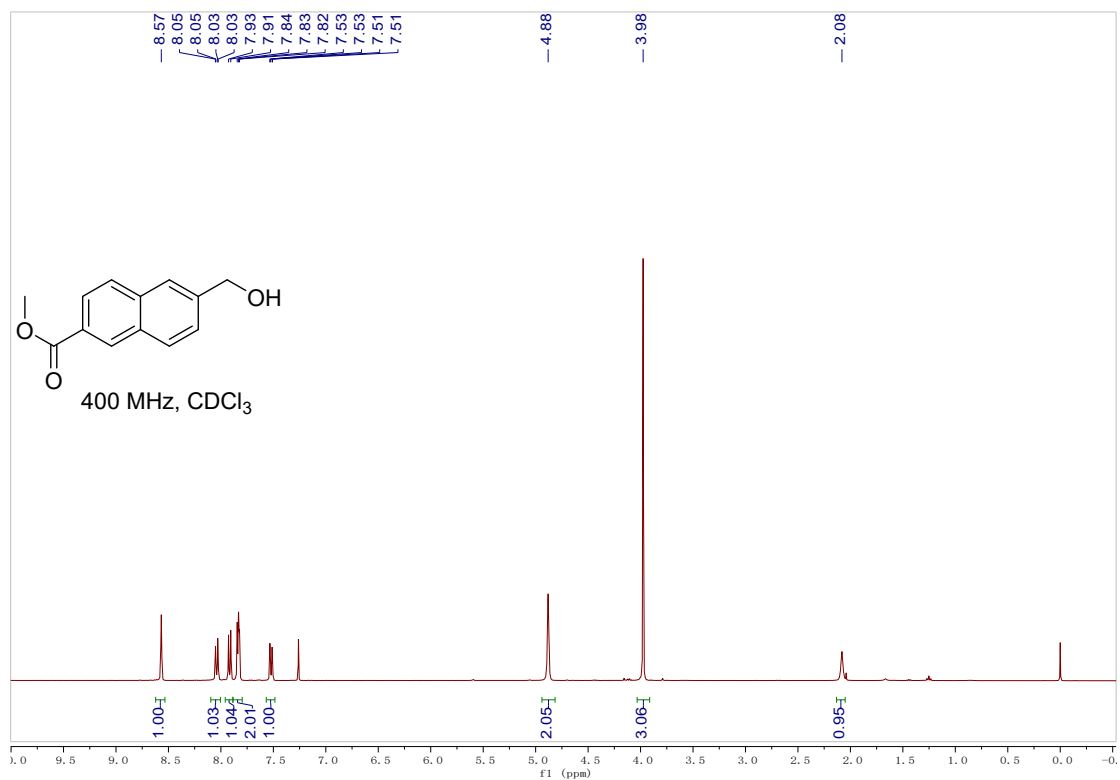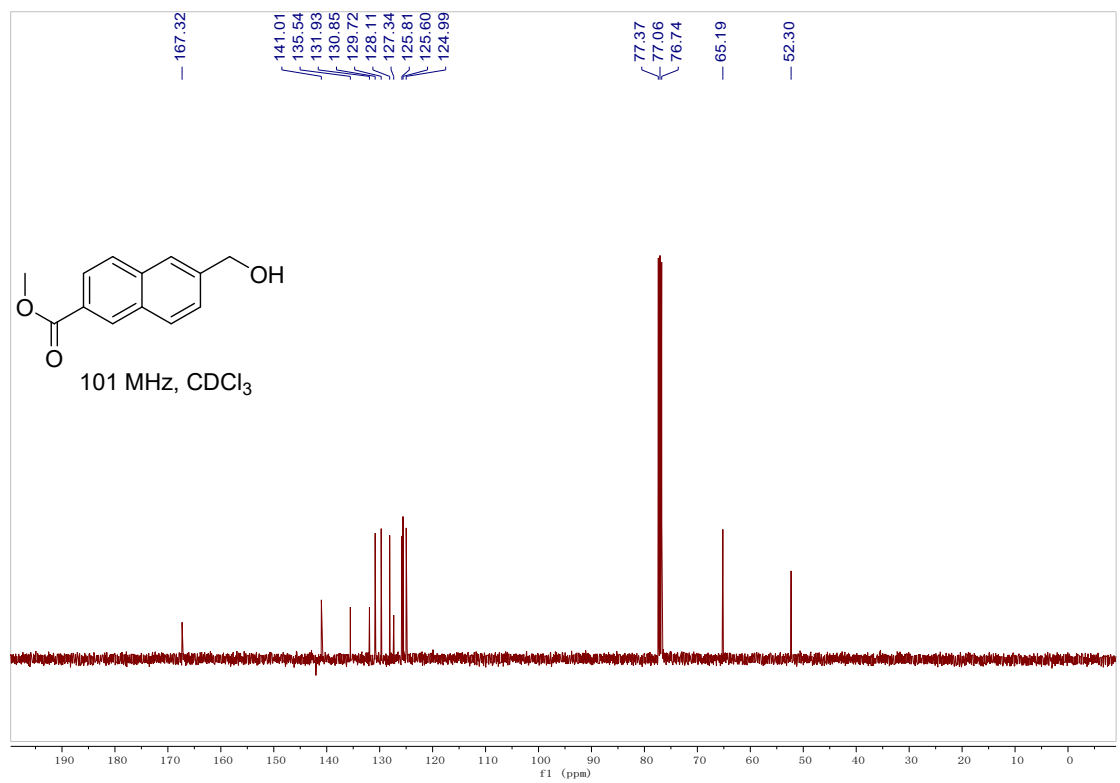

### 4-(Hydroxymethyl)-3-methylbenzonitrile (1m)

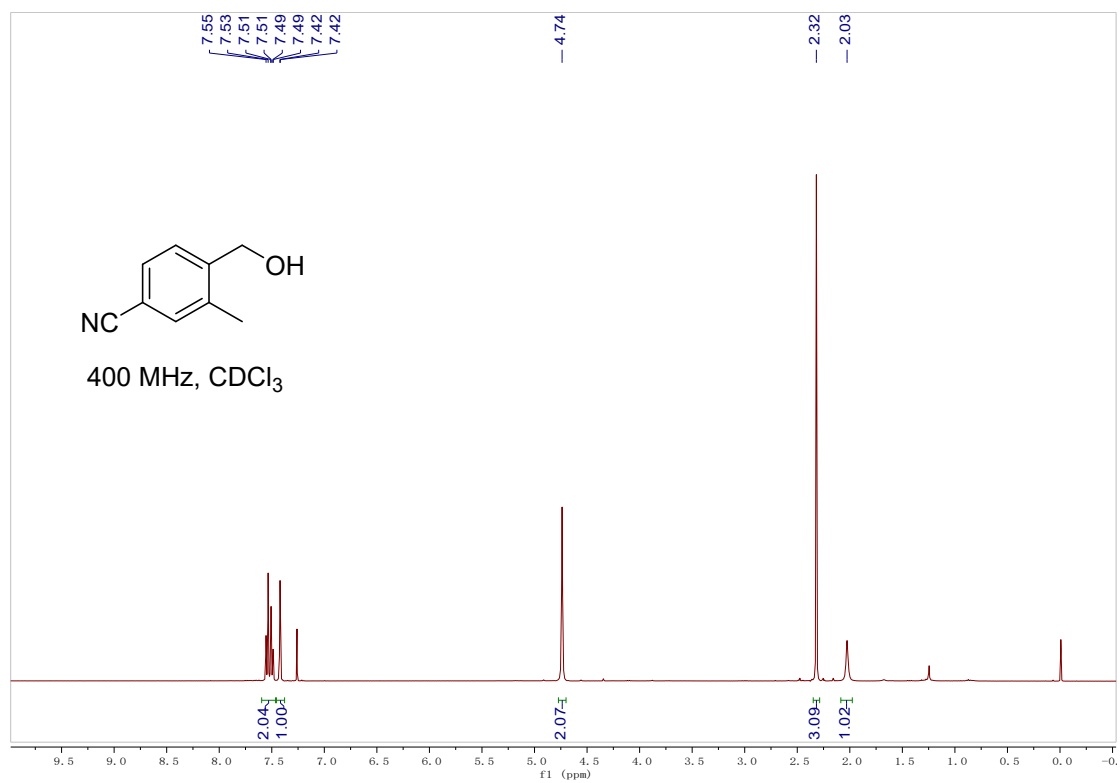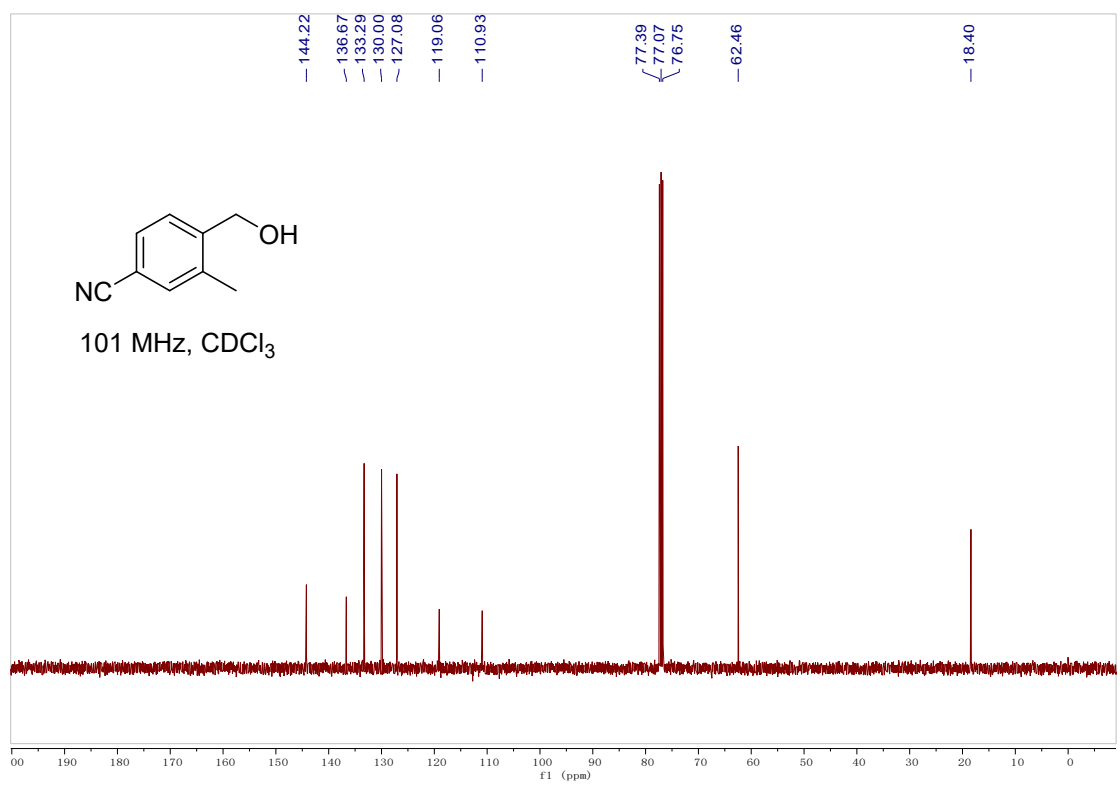

### 4-(Hydroxymethyl)-2-methylbenzonitrile (1n)

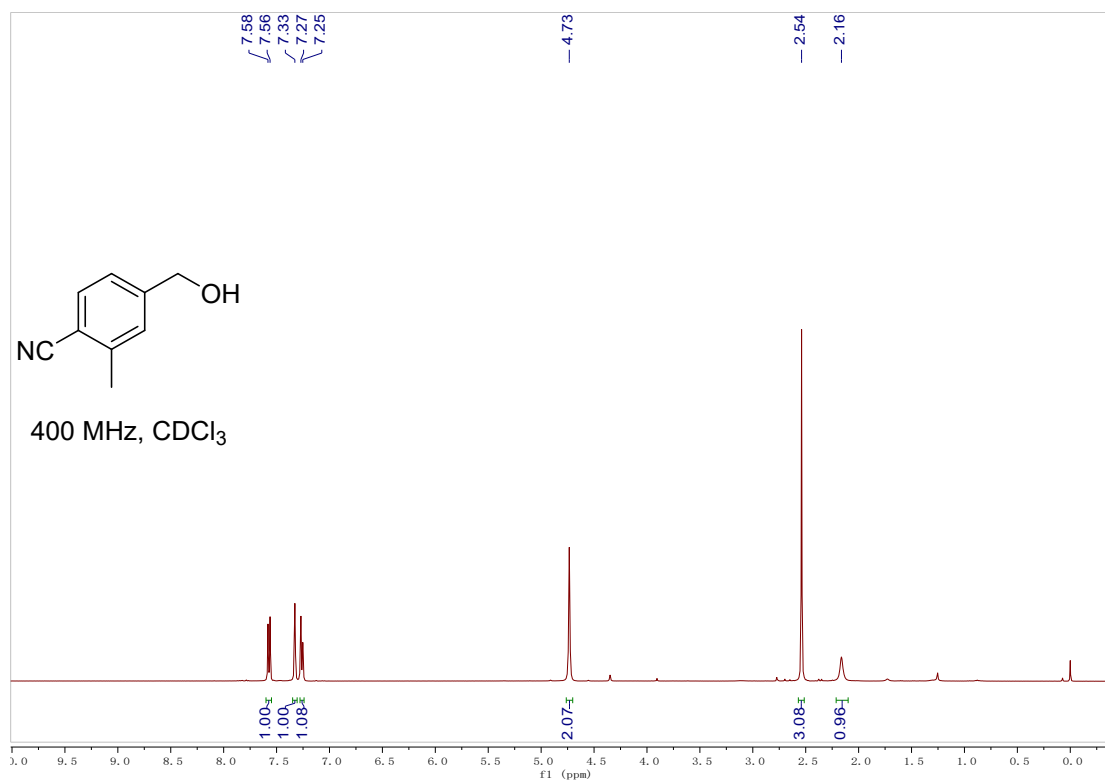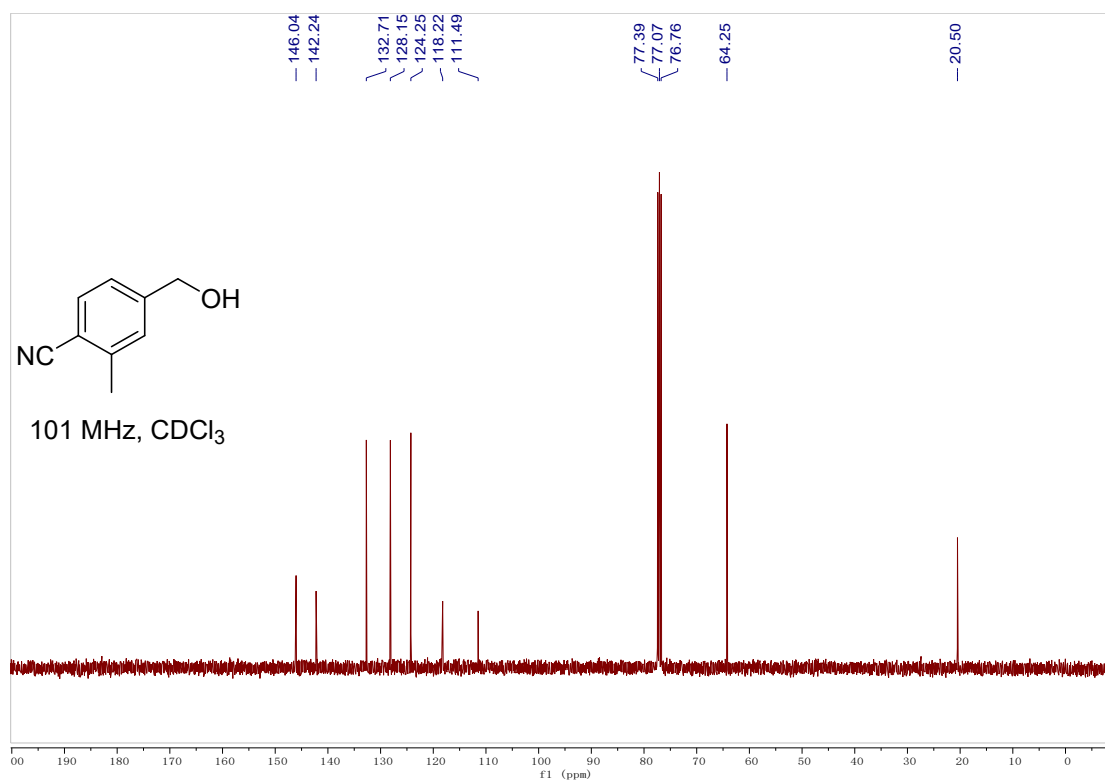



### 4-(Hydroxymethyl)-2-methoxybenzonitrile (1o)

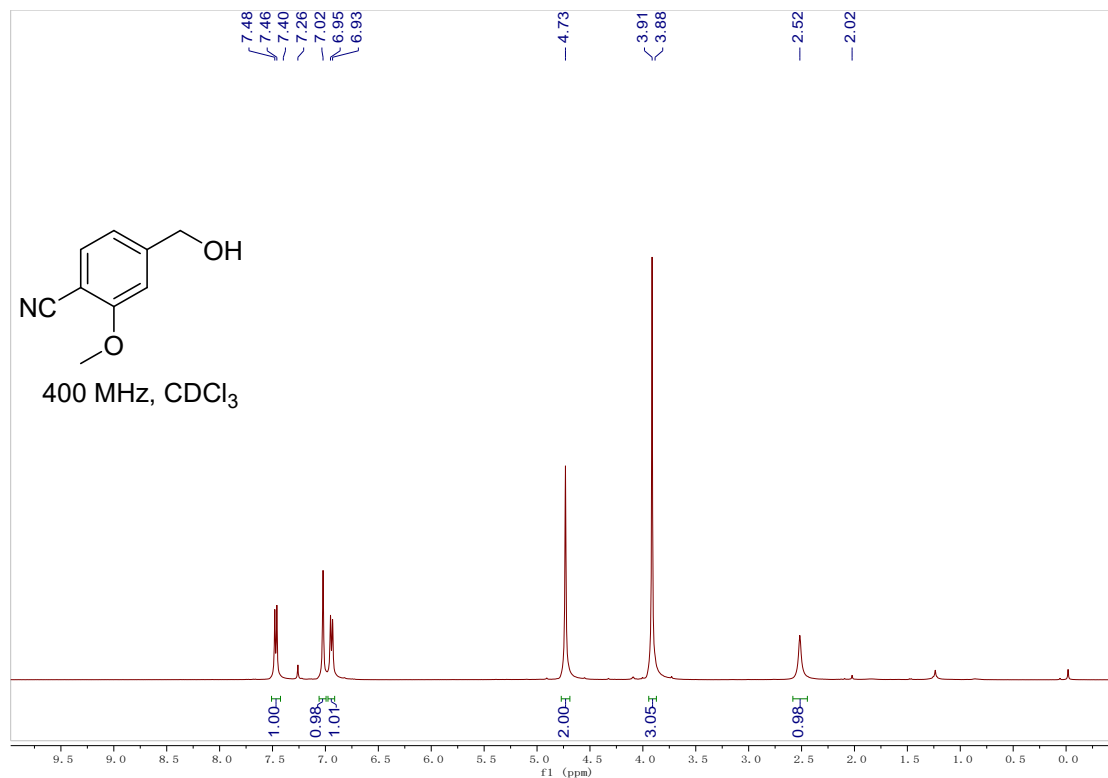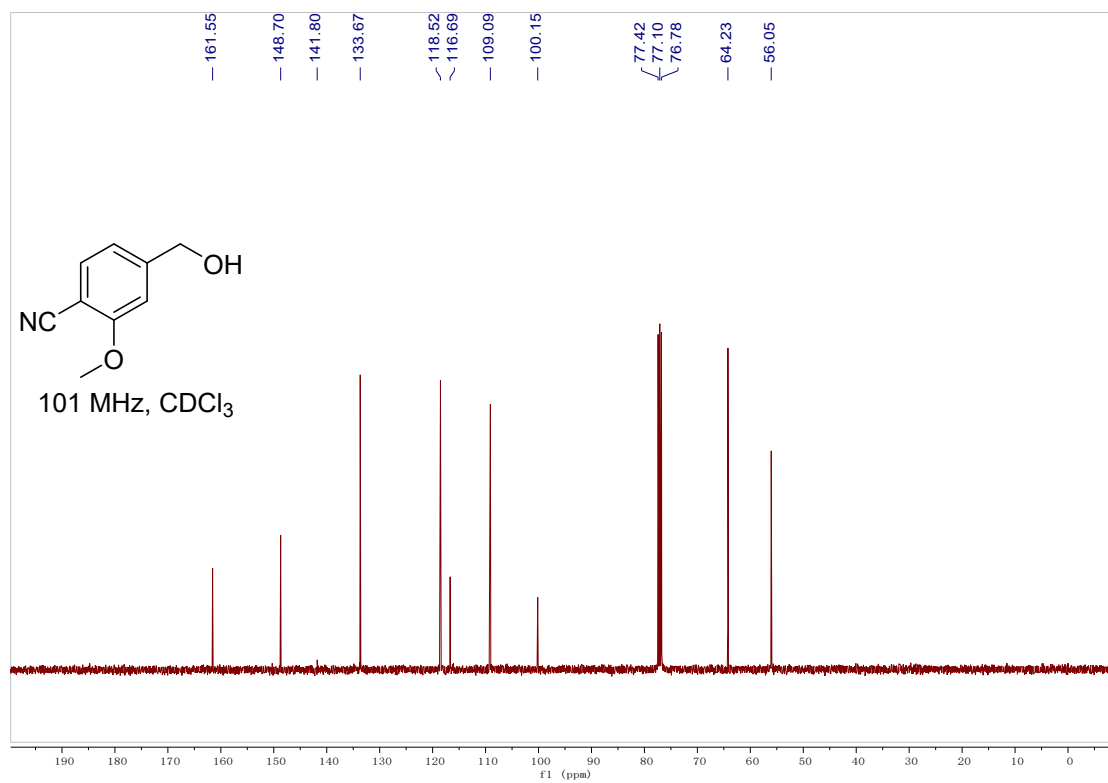

**2-(But-3-en-1-yloxy)-4-(hydroxymethyl)benzonitrile (1p)**

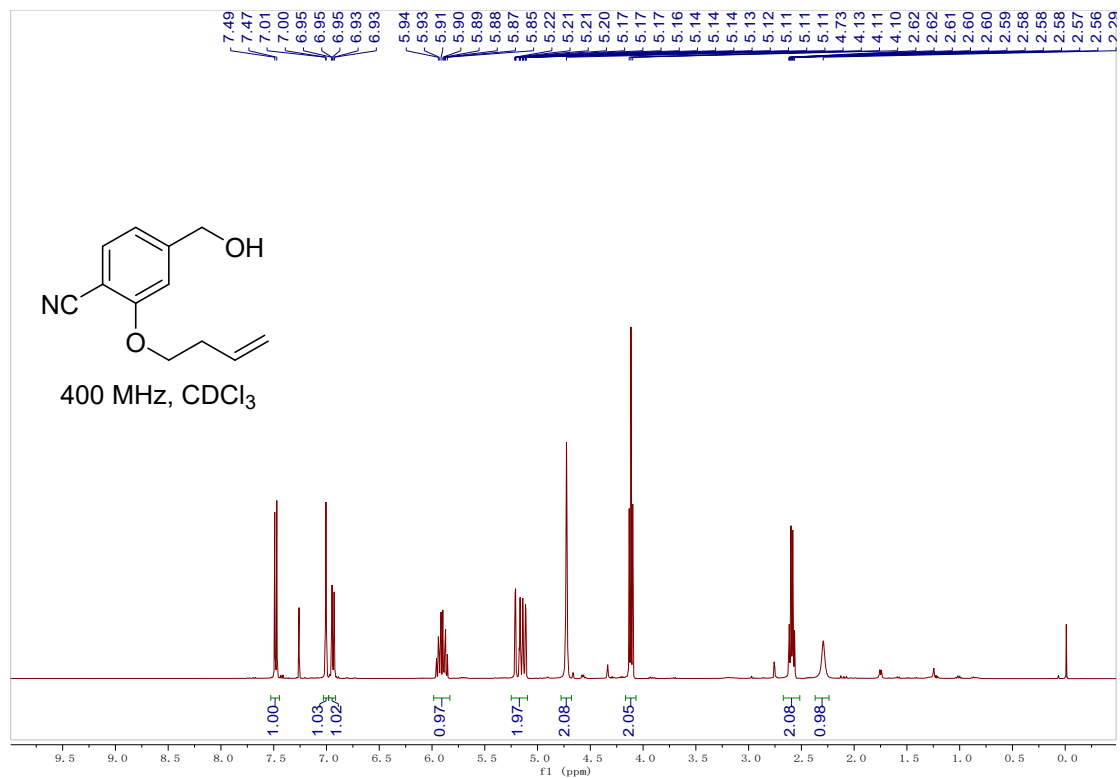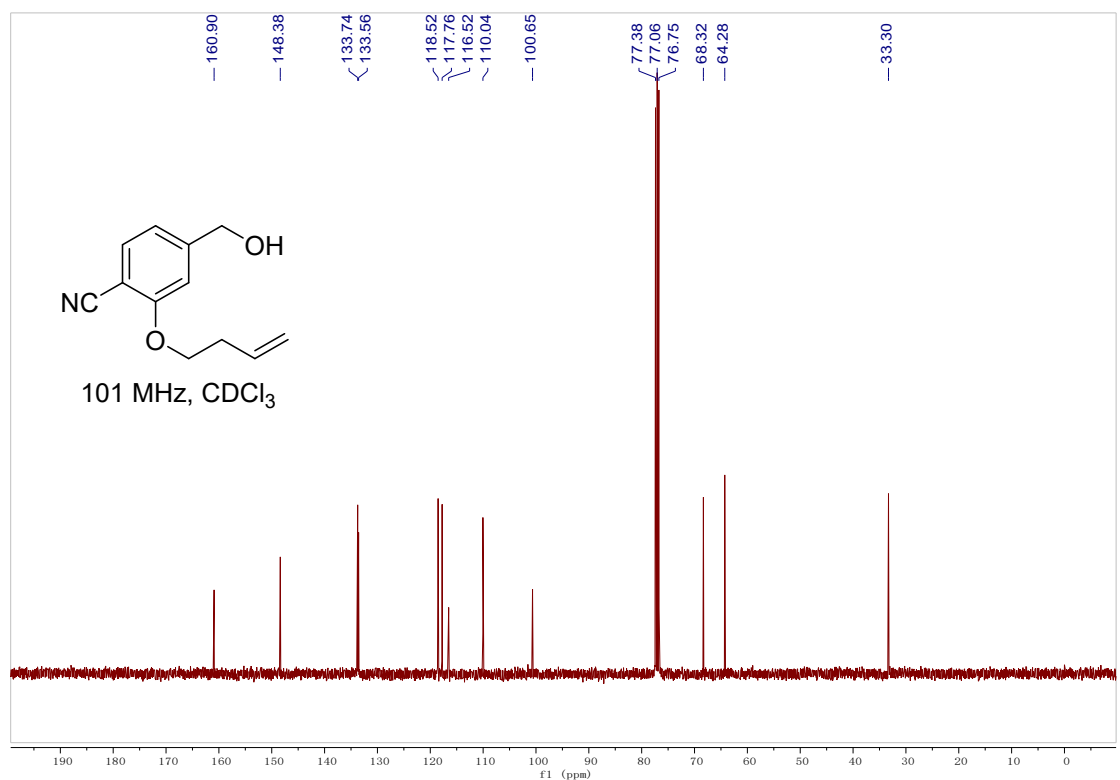

### 4-(Hydroxymethyl)-2-(prop-2-yn-1-yloxy)benzonitrile (1q)

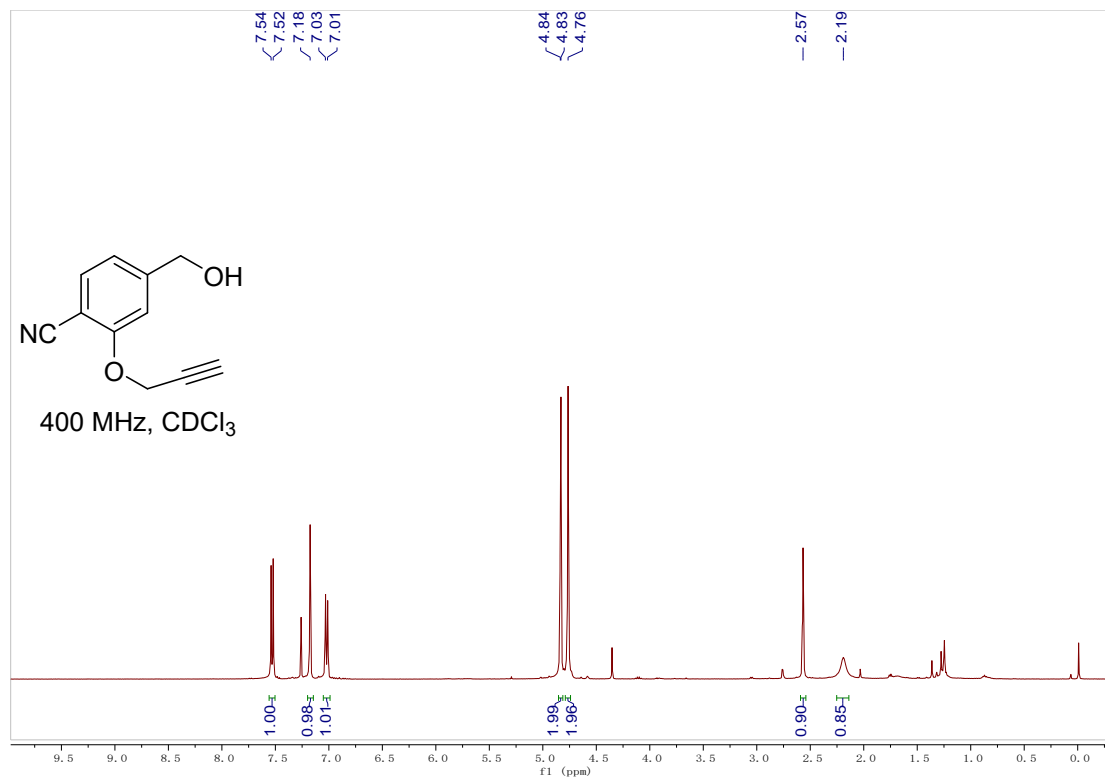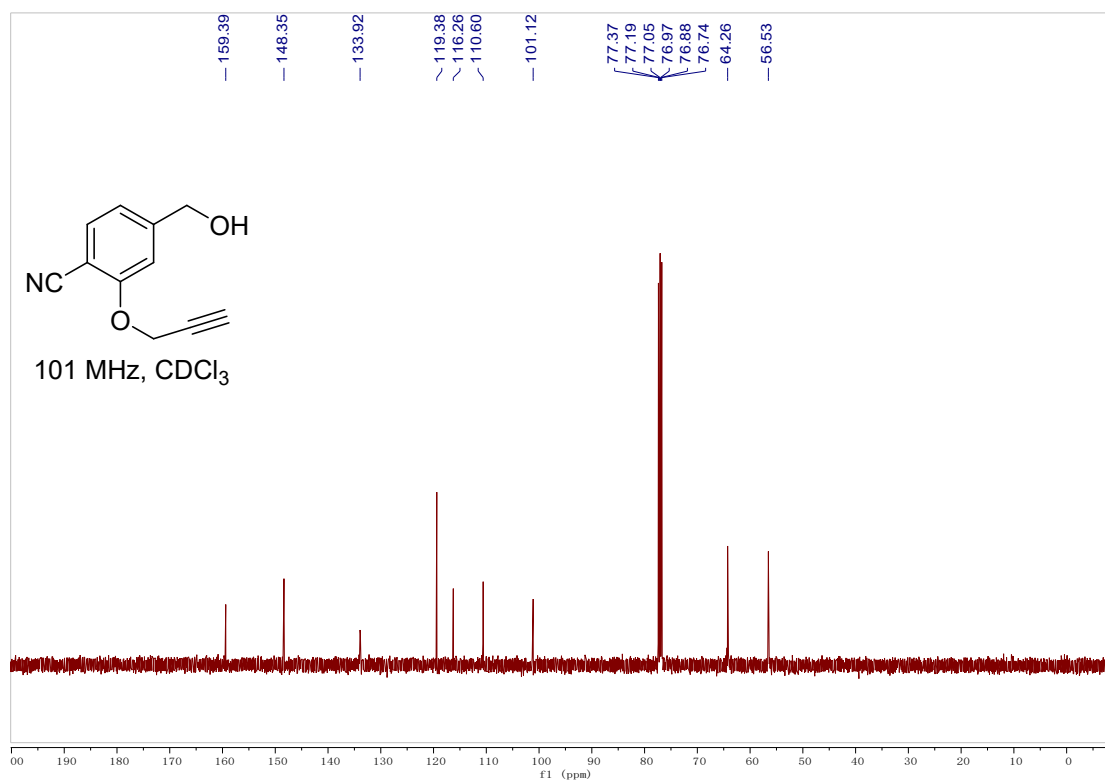

### 2-((5-Cyanopentyl)oxy)-4-(hydroxymethyl)benzonitrile (1r)

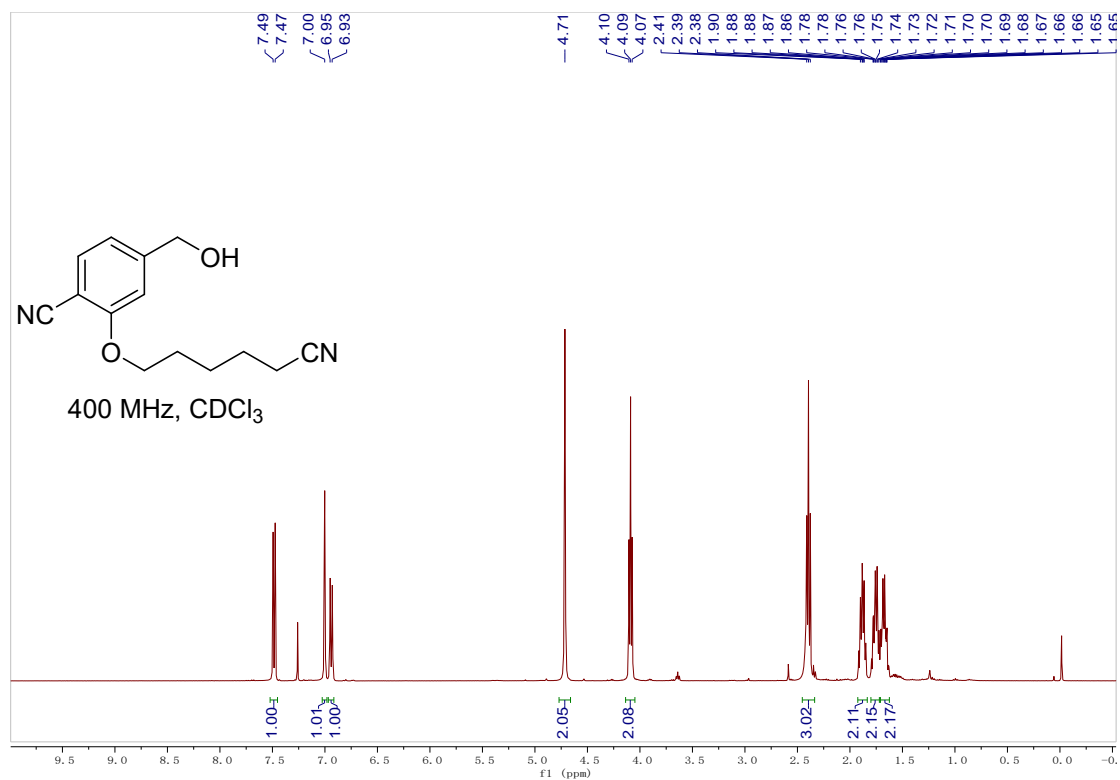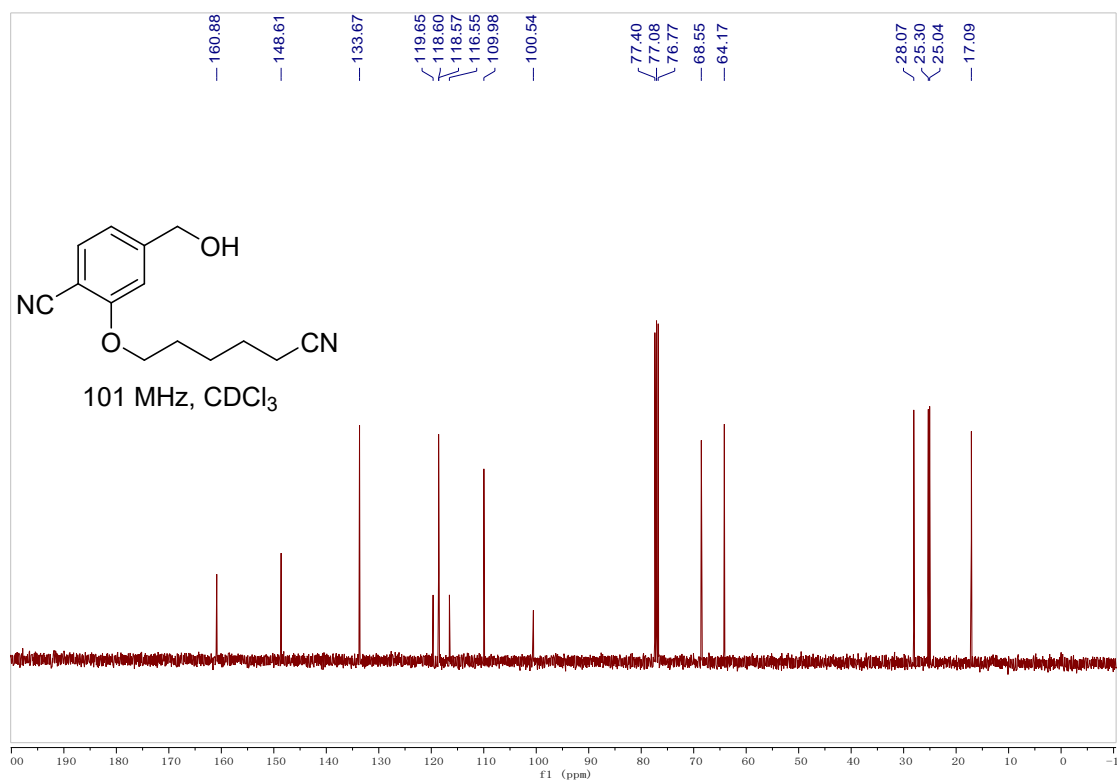

**2-(2-Fluoroethoxy)-4-(hydroxymethyl)benzonitrile (1s)**

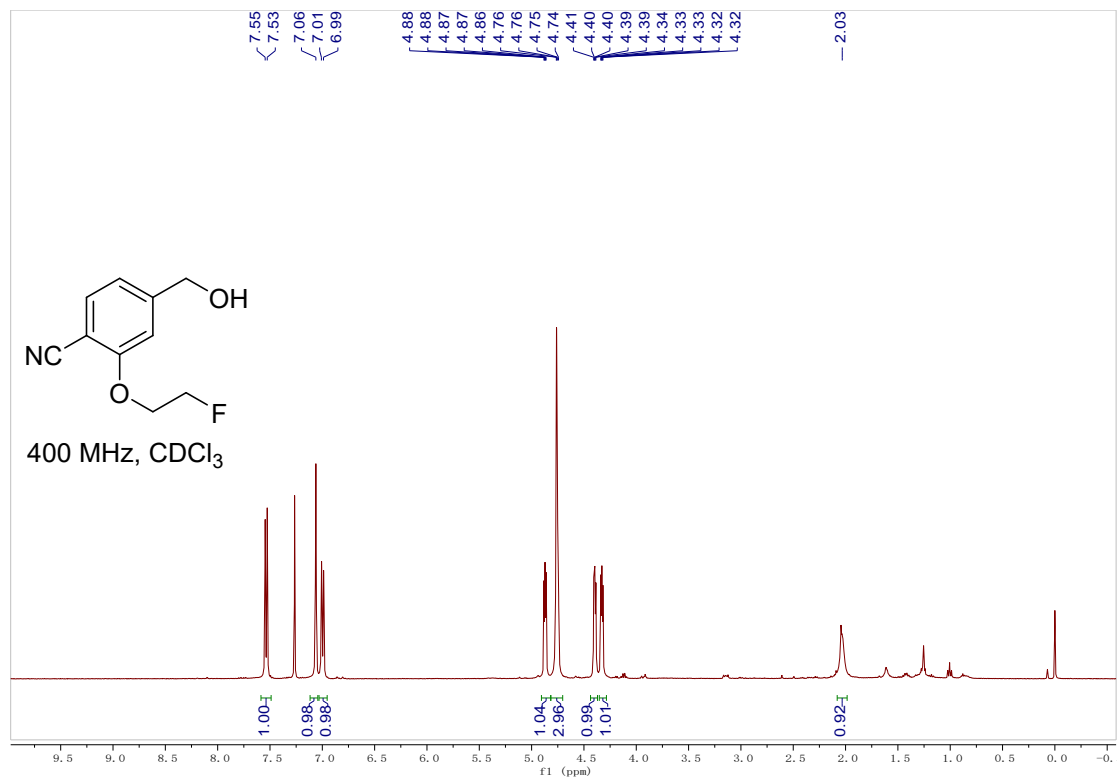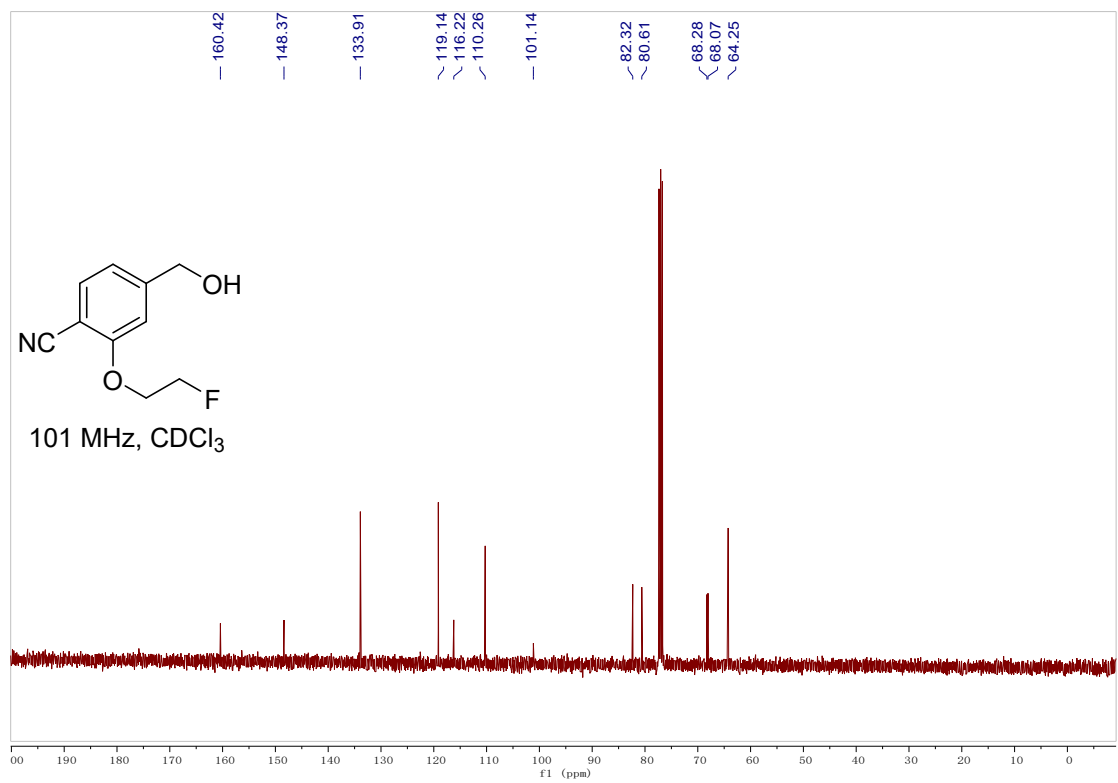

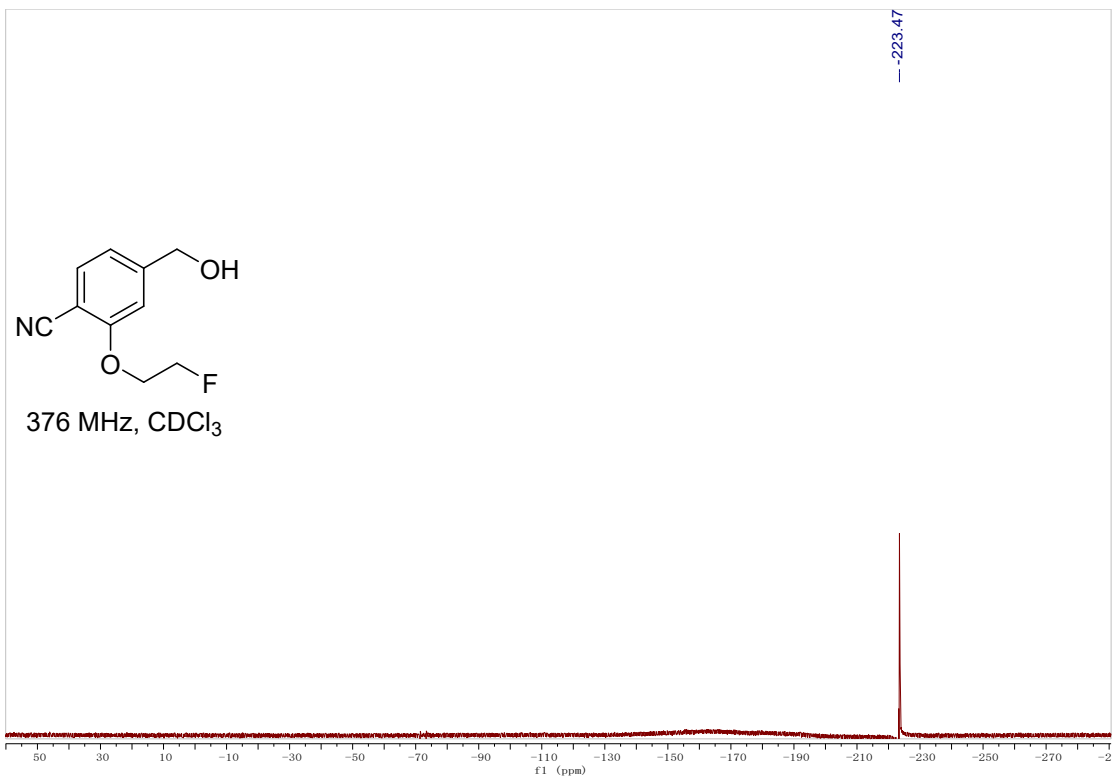

**Methyl 4-(2-(2-cyano-5-(hydroxymethyl)phenoxy)ethyl)benzoate (1t)**

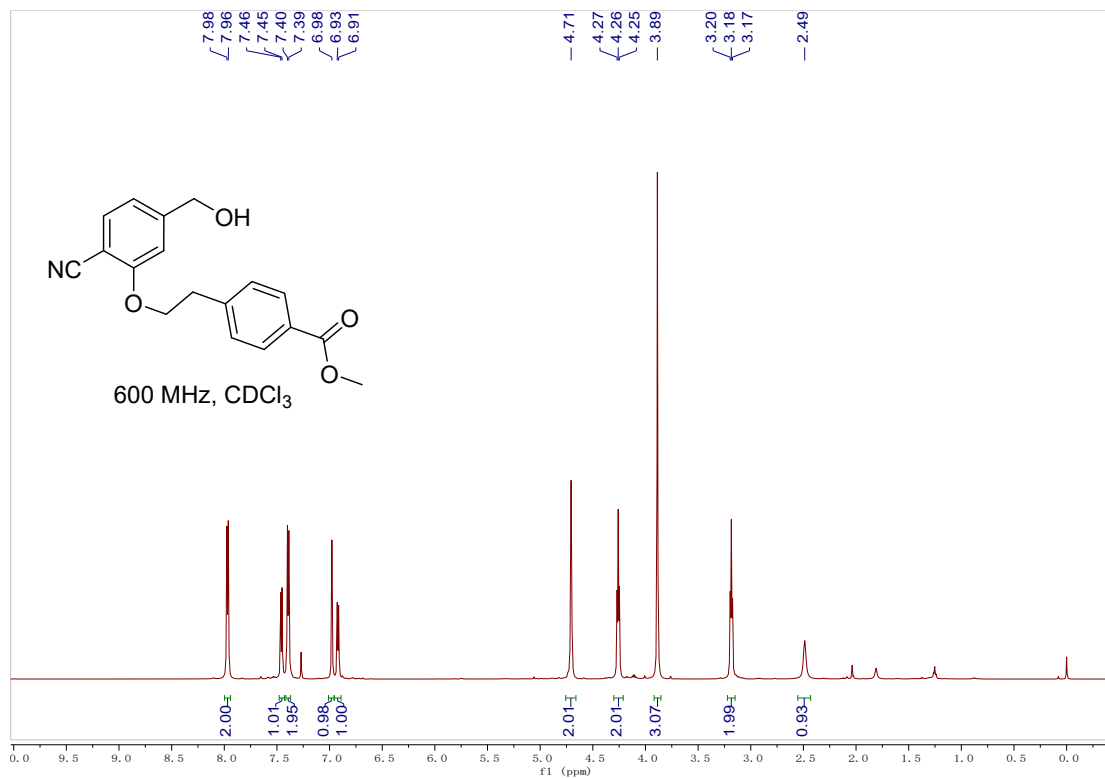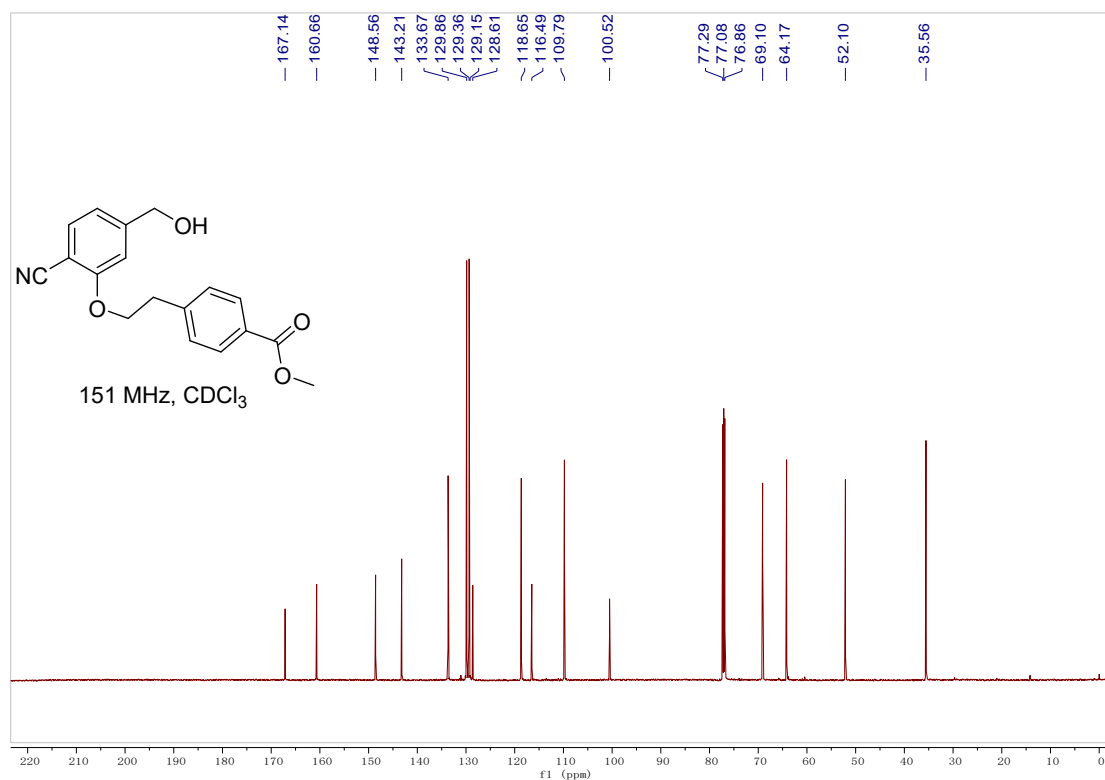

# Pyridin-2-ylmethanol (1u)

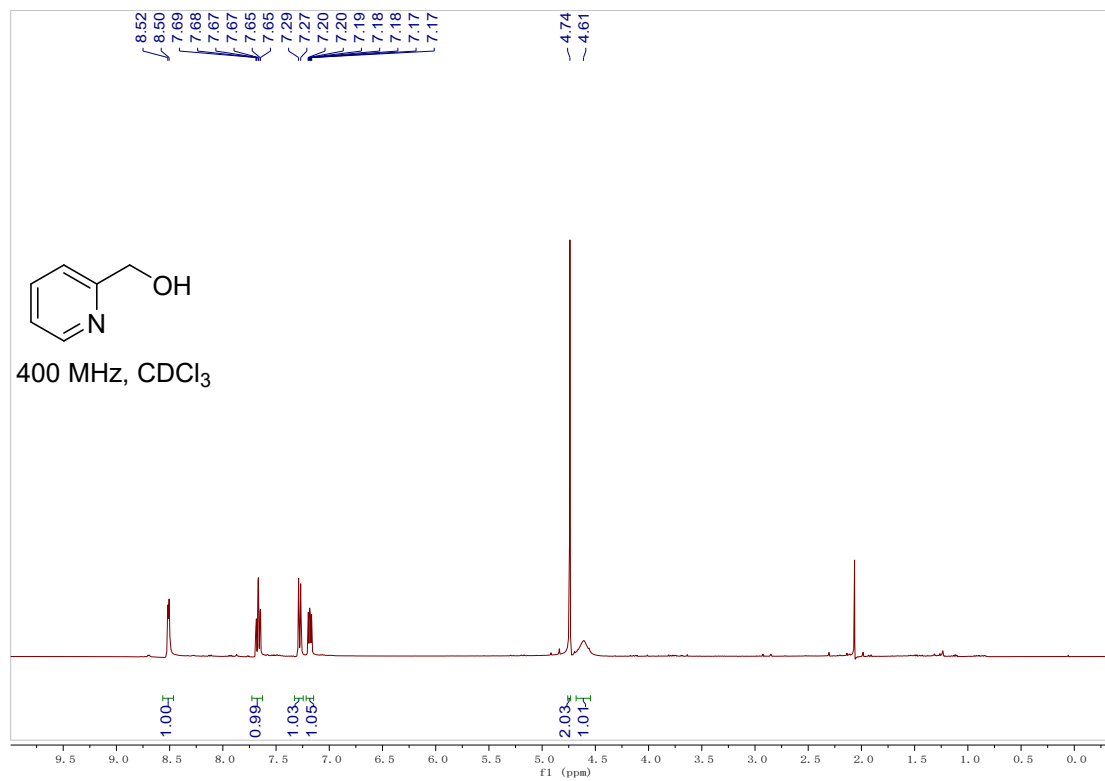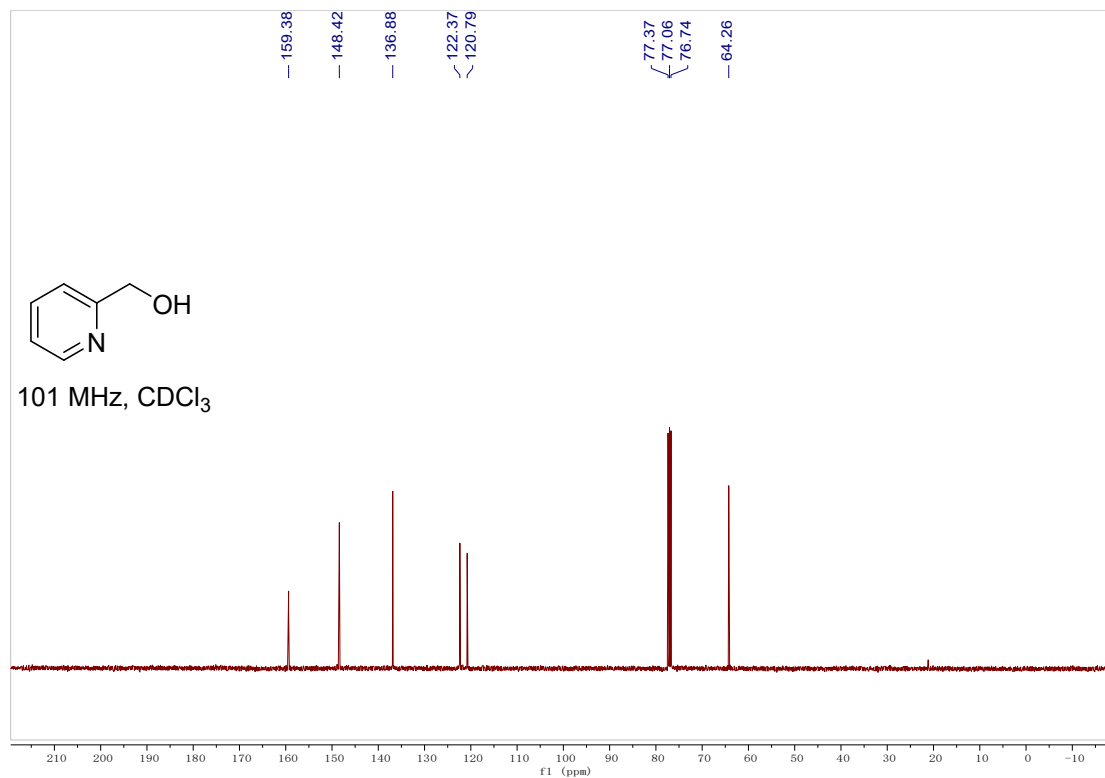



### Pyridin-4-ylmethanol (1v)

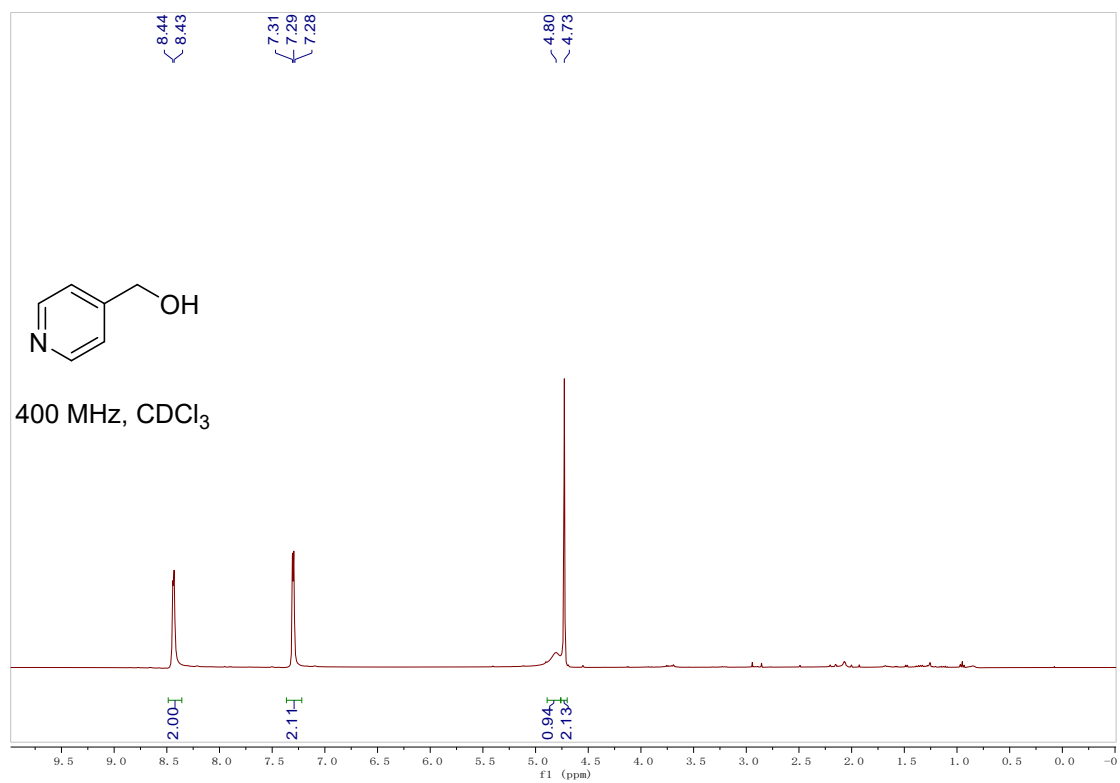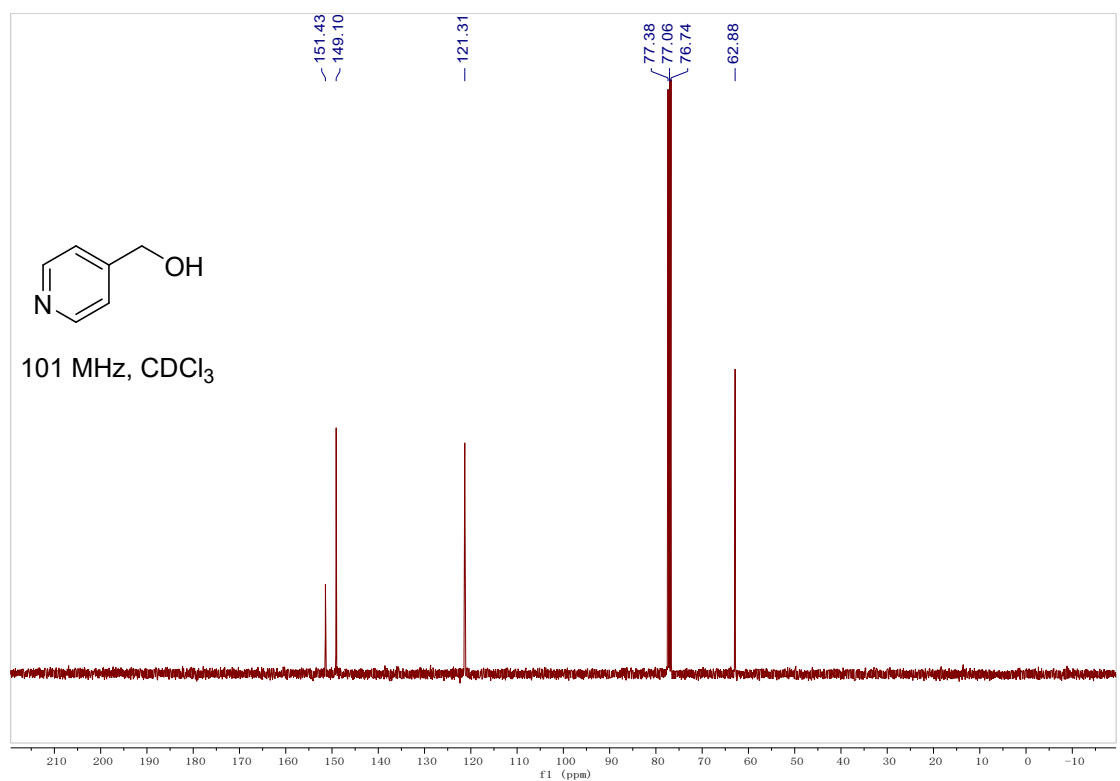

# Phenylmethanol (2a)

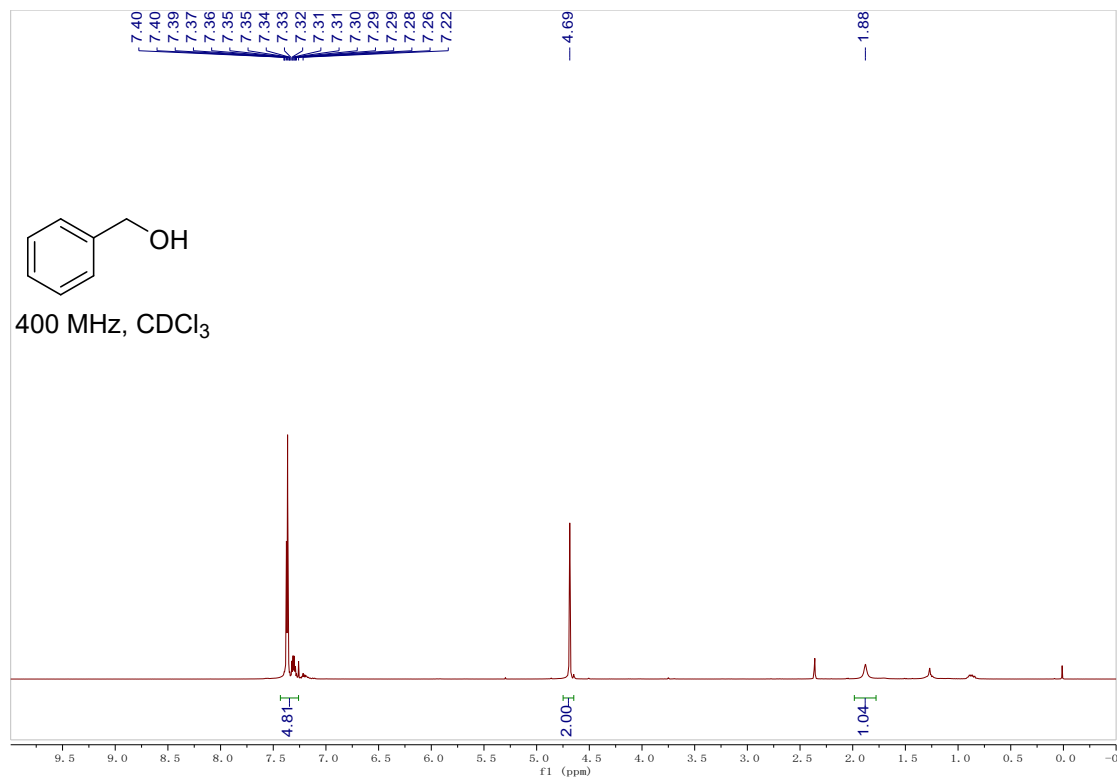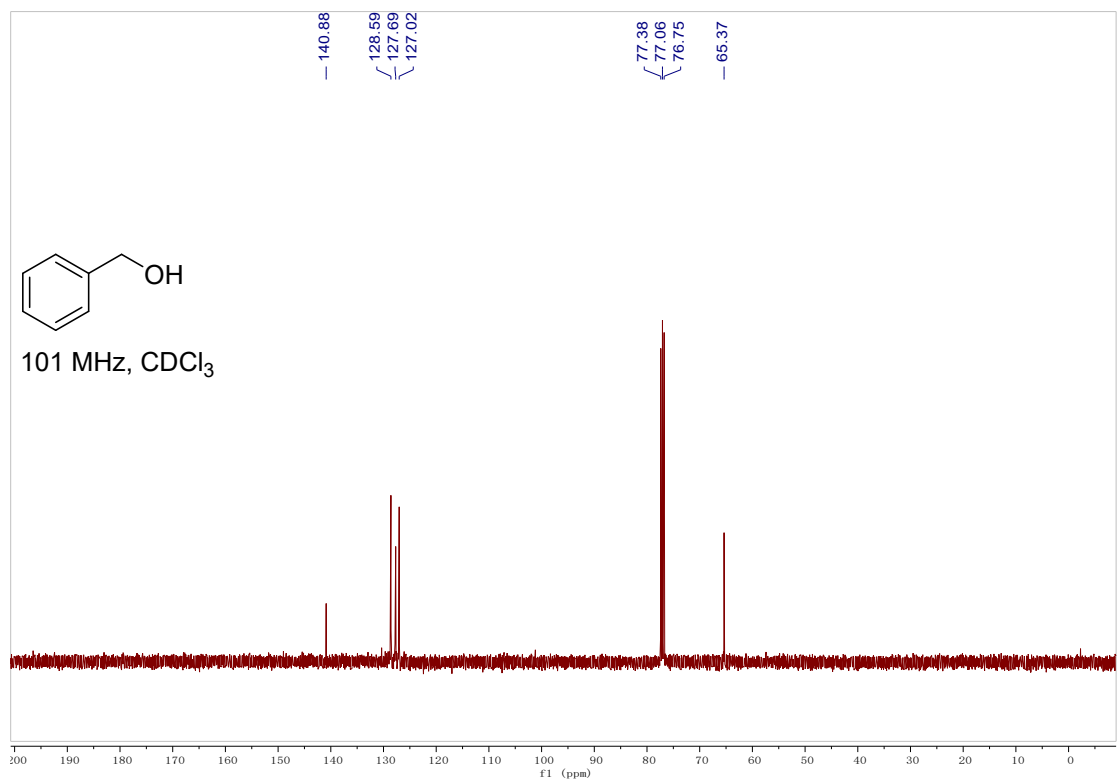

***p*-Tolylmethanol (2b)**

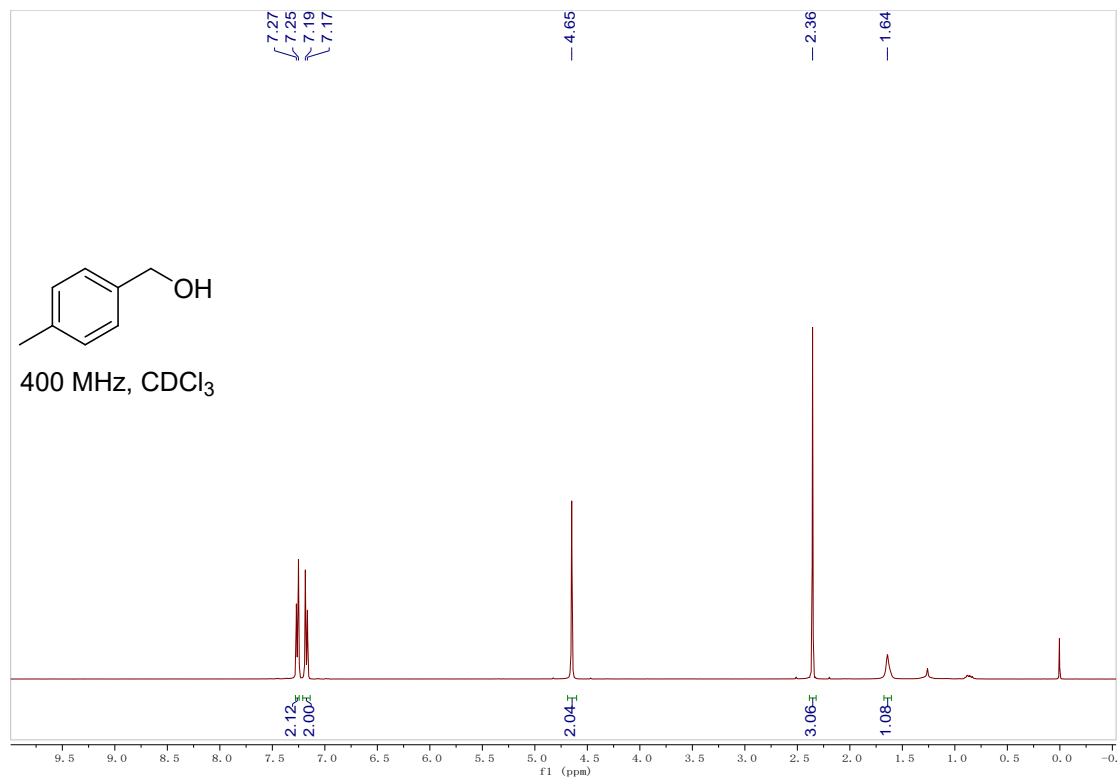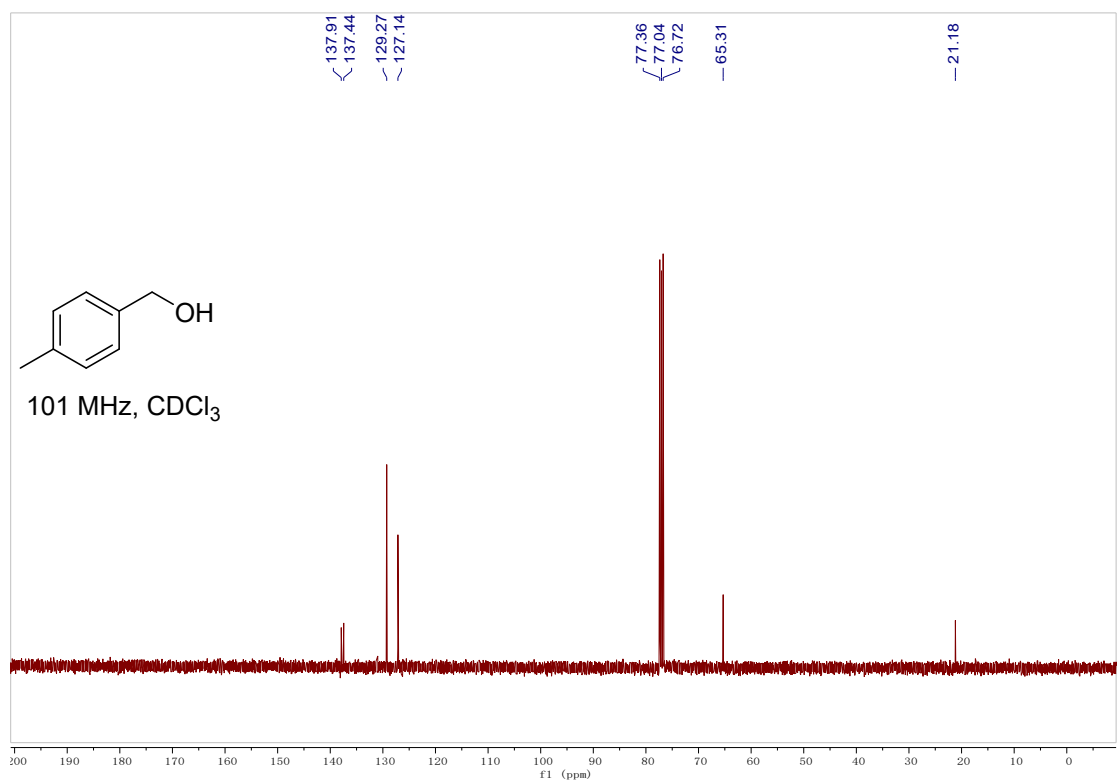

***m*-Tolylmethanol (2c)**

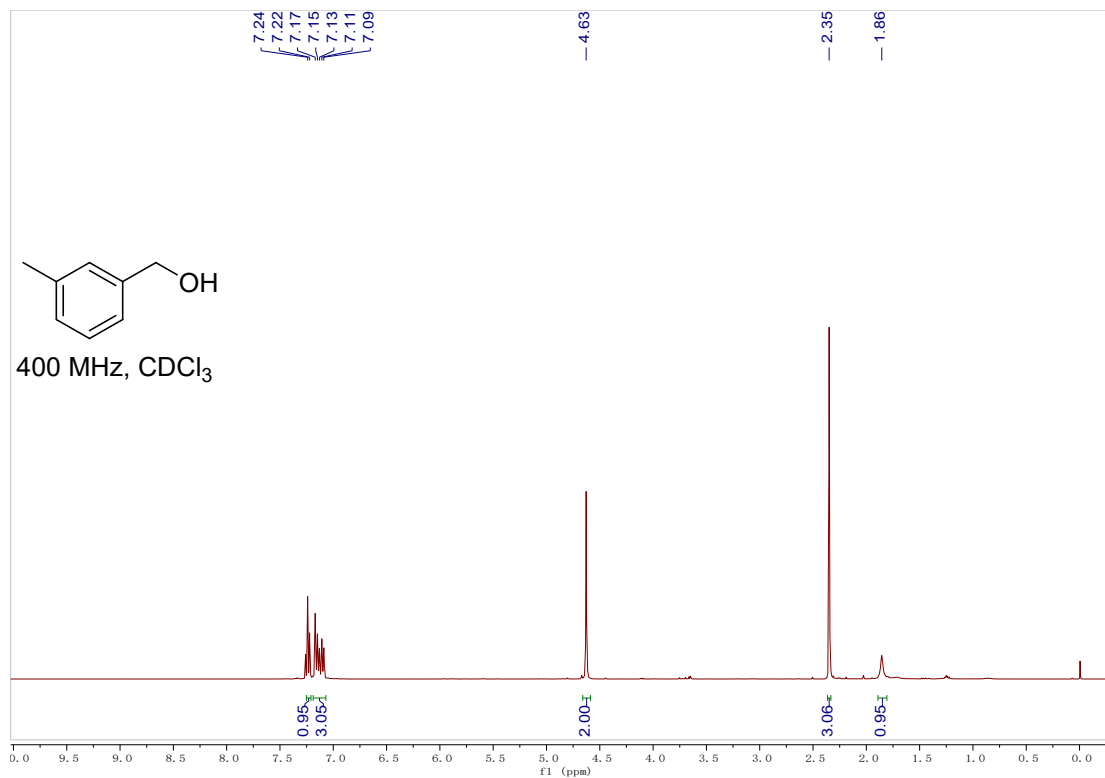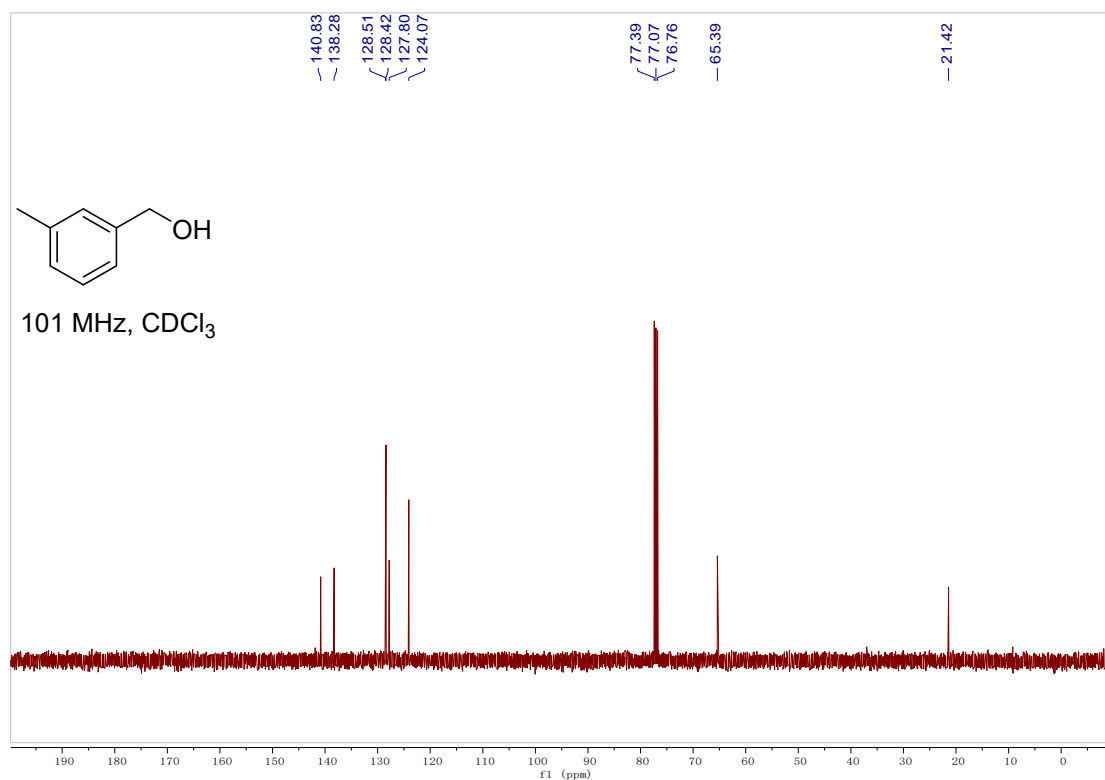

***o*-Tolylmethanol (2f)**

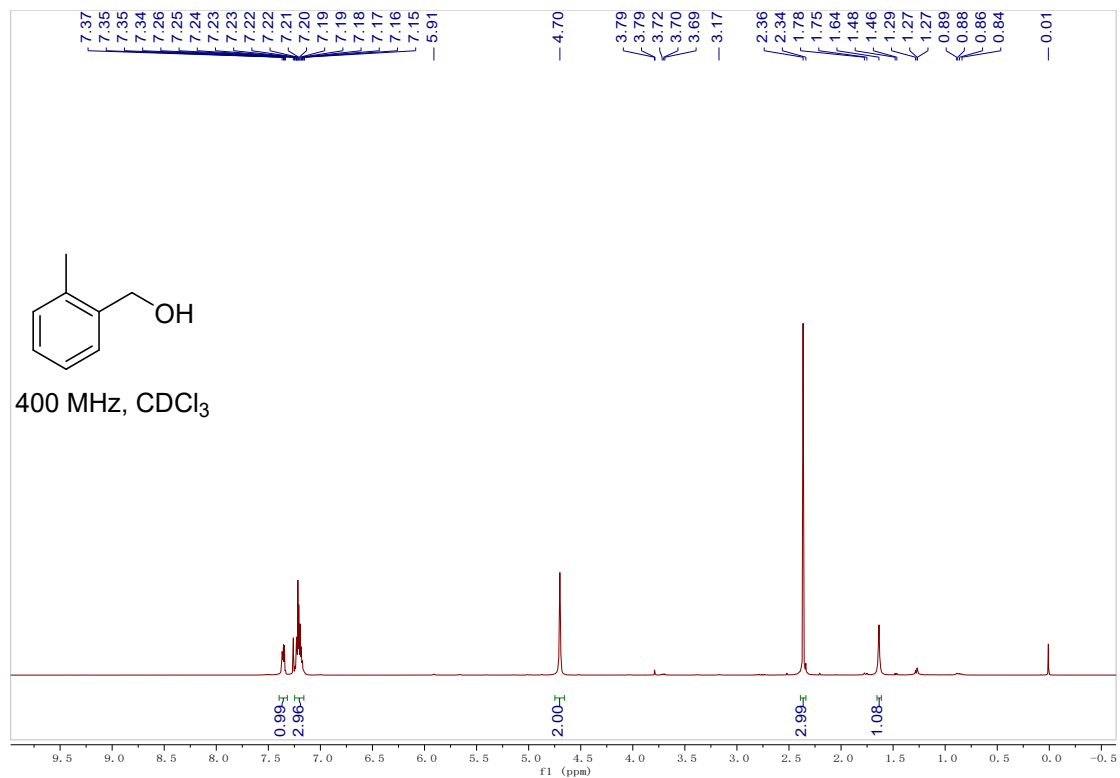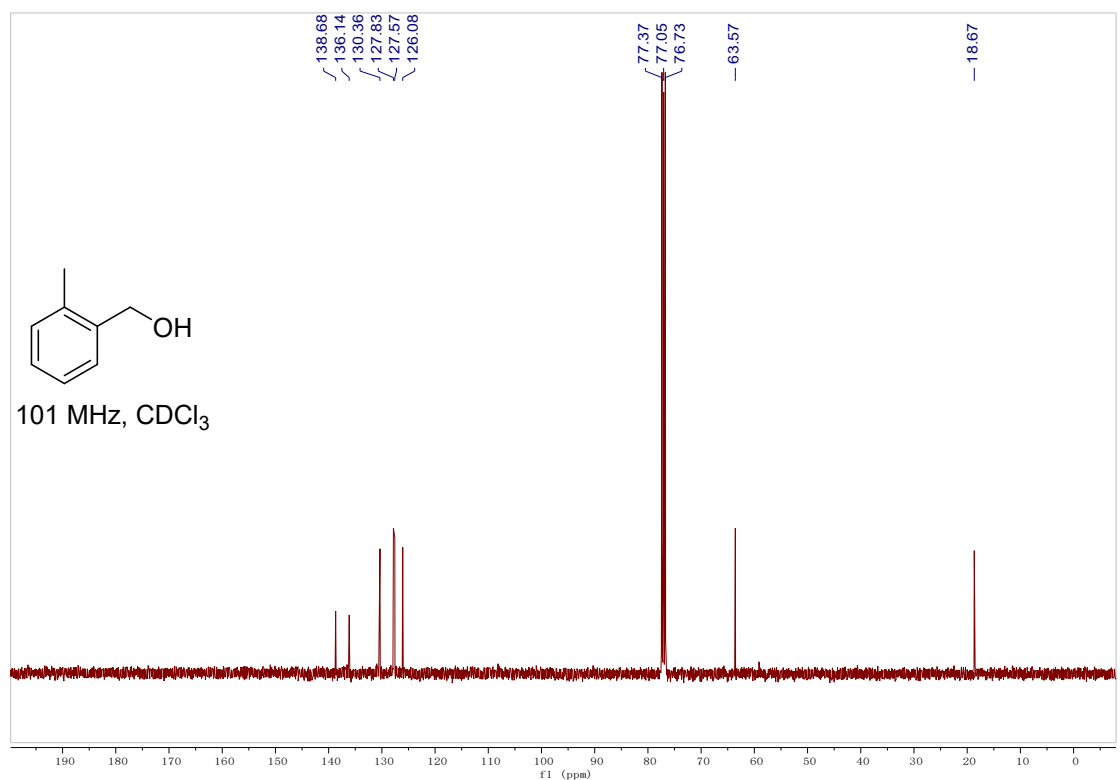

**(3,5-Dimethylphenyl)methanol (2g)**

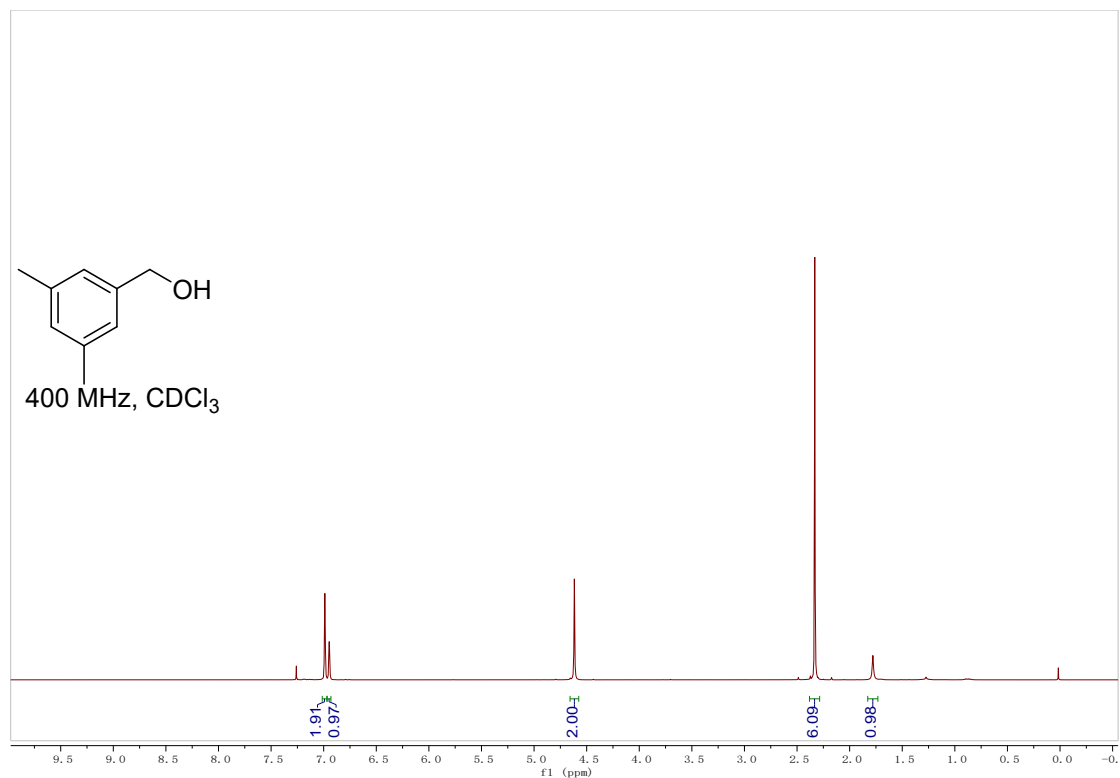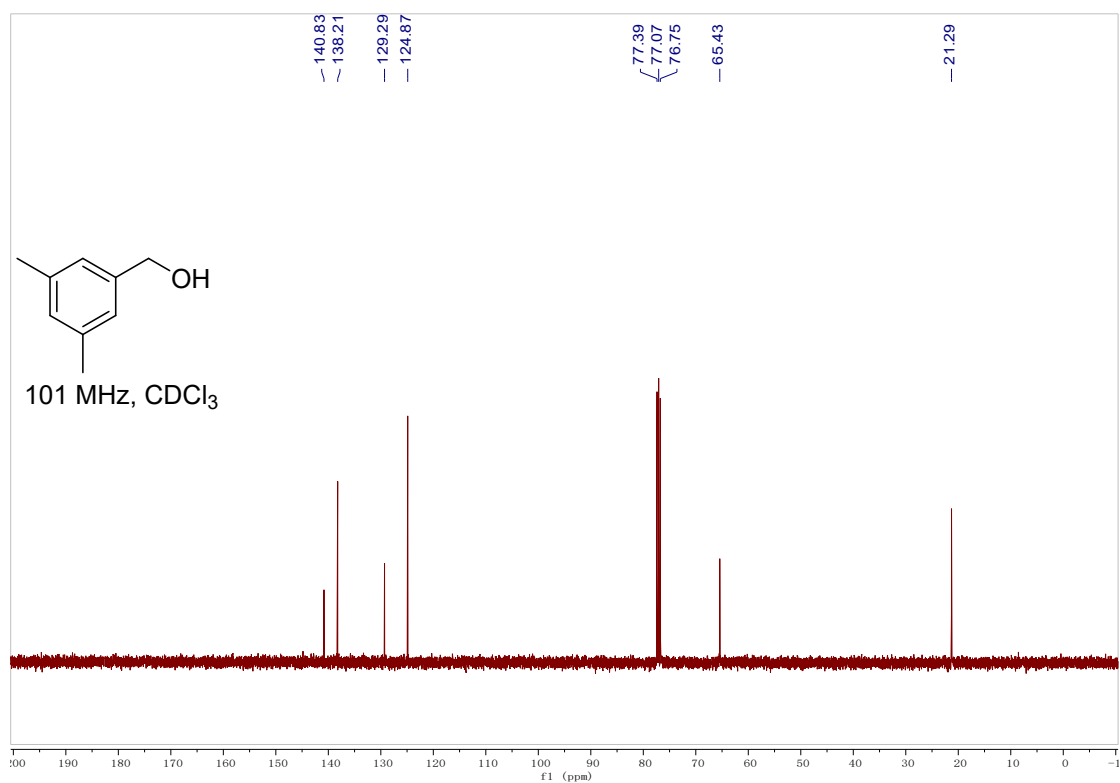

### Mesitylmethanol (2h)

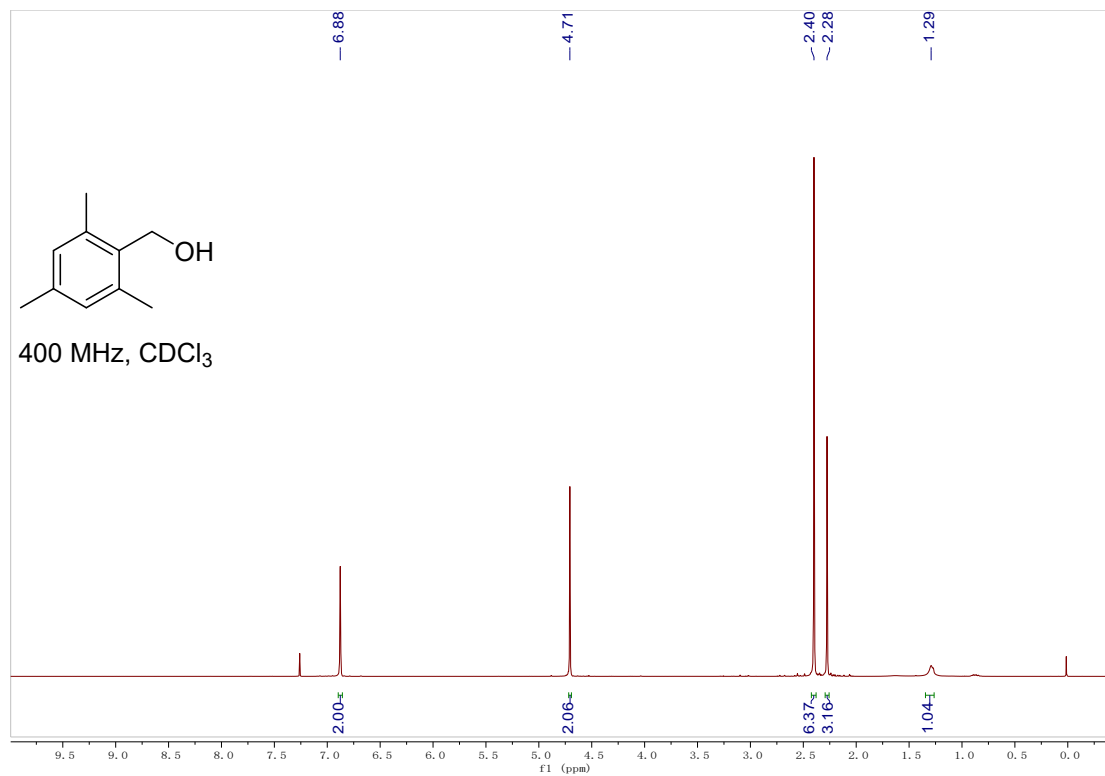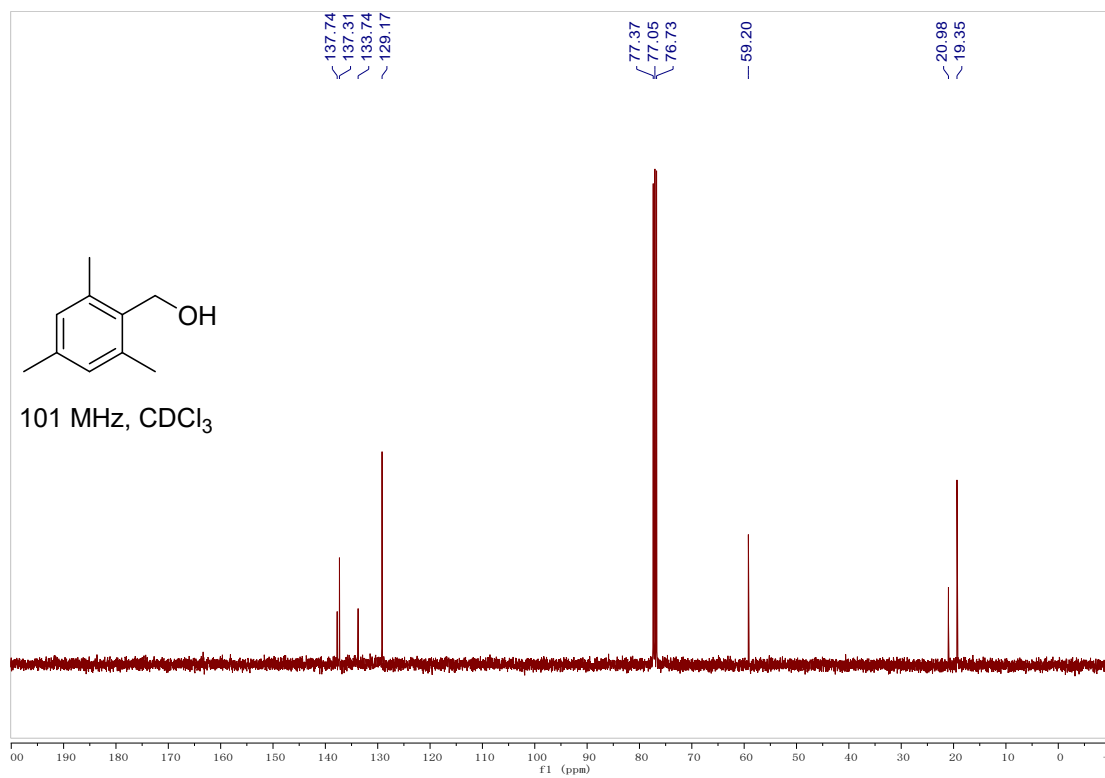

**(4-(tert-Butyl)phenyl)methanol (2i)**

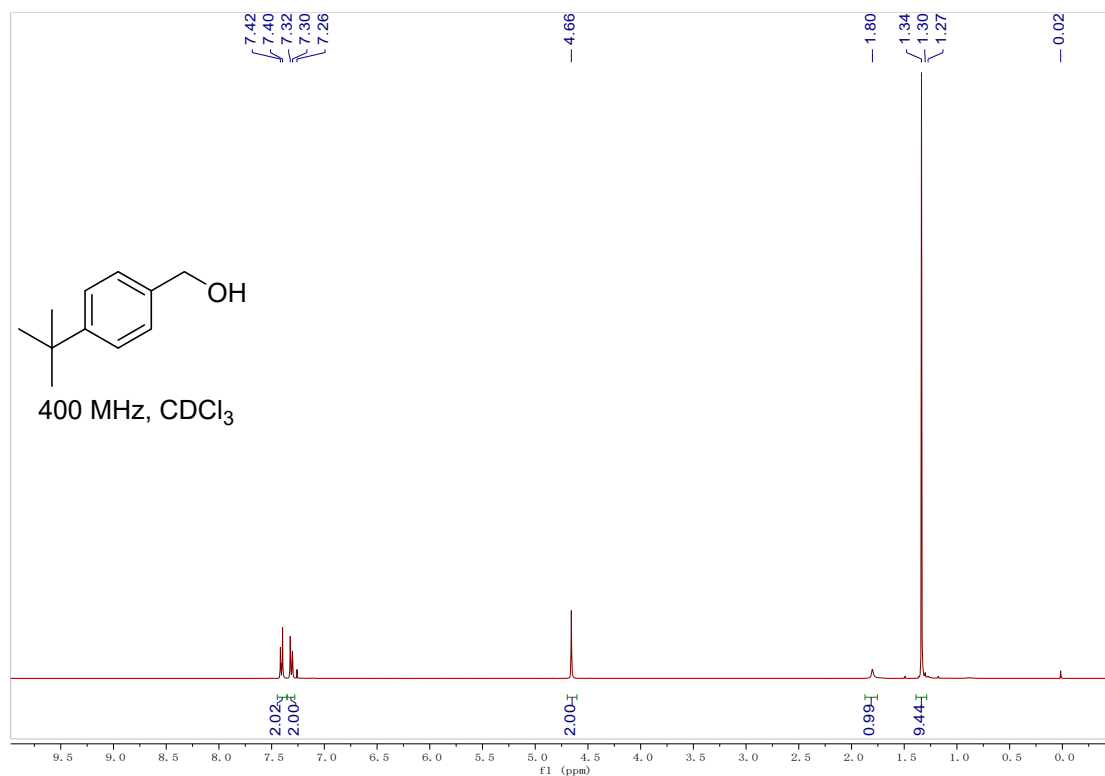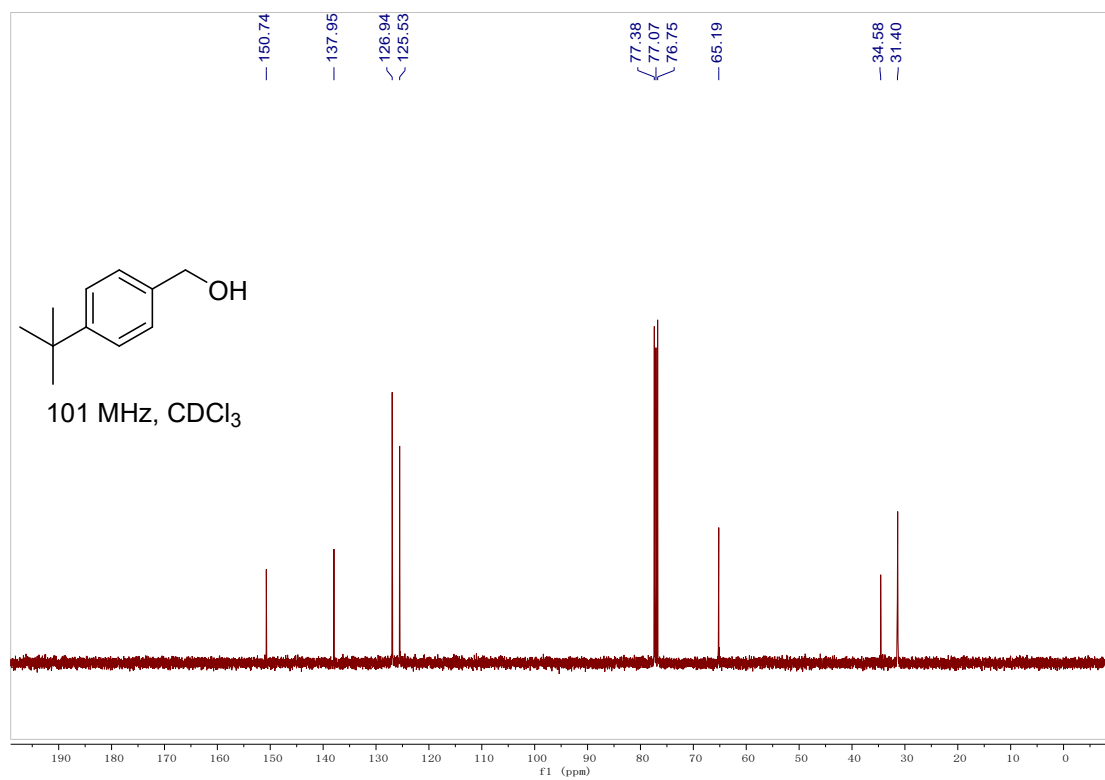



**[1, 1'-Biphenyl]-4-ylmethanol (2j)**

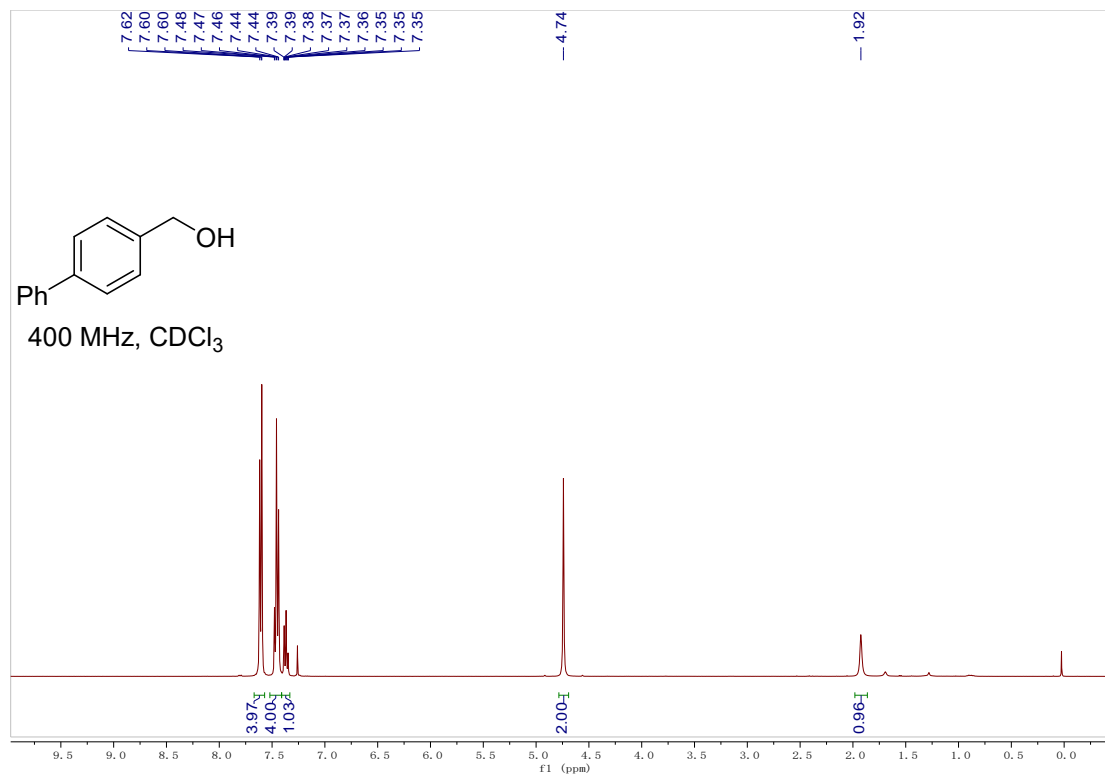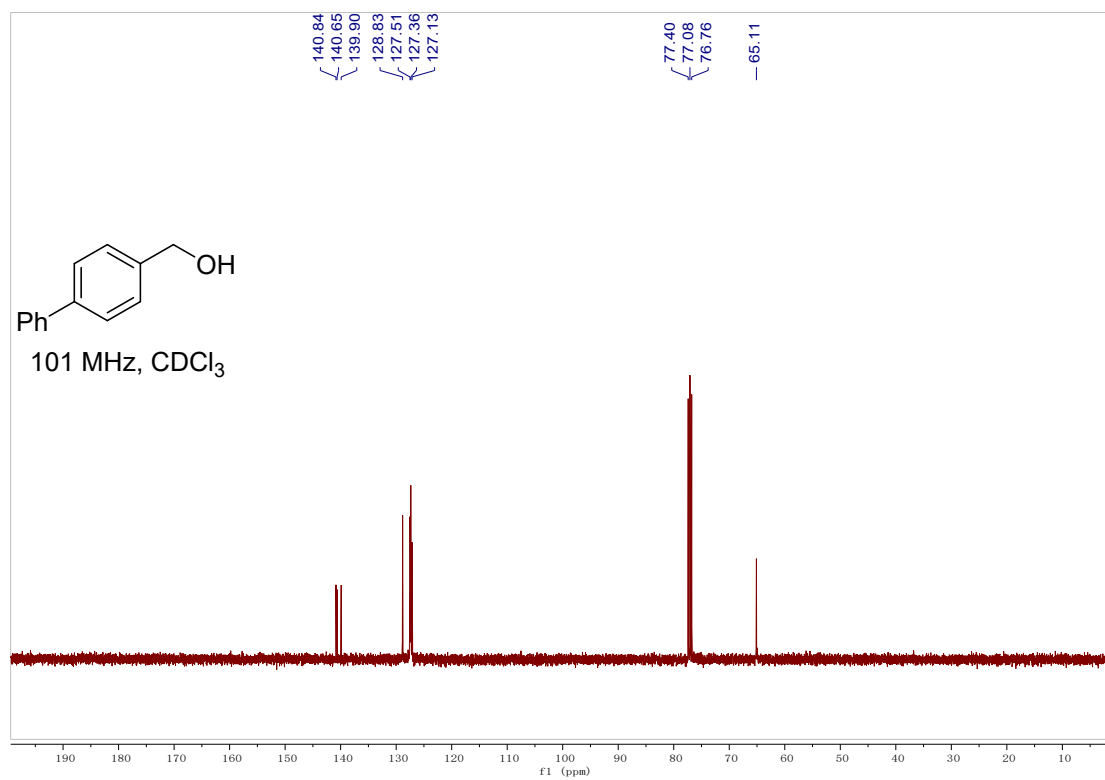

**(4-(Trimethylsilyl)phenyl)methanol (2k)**

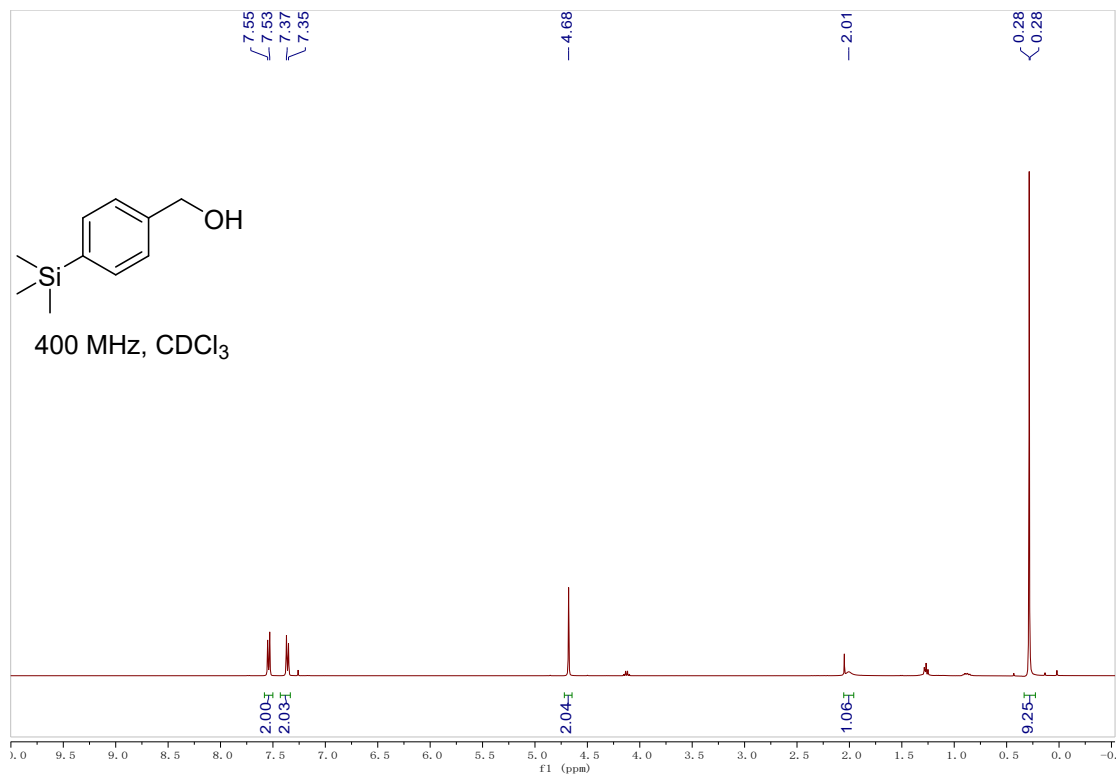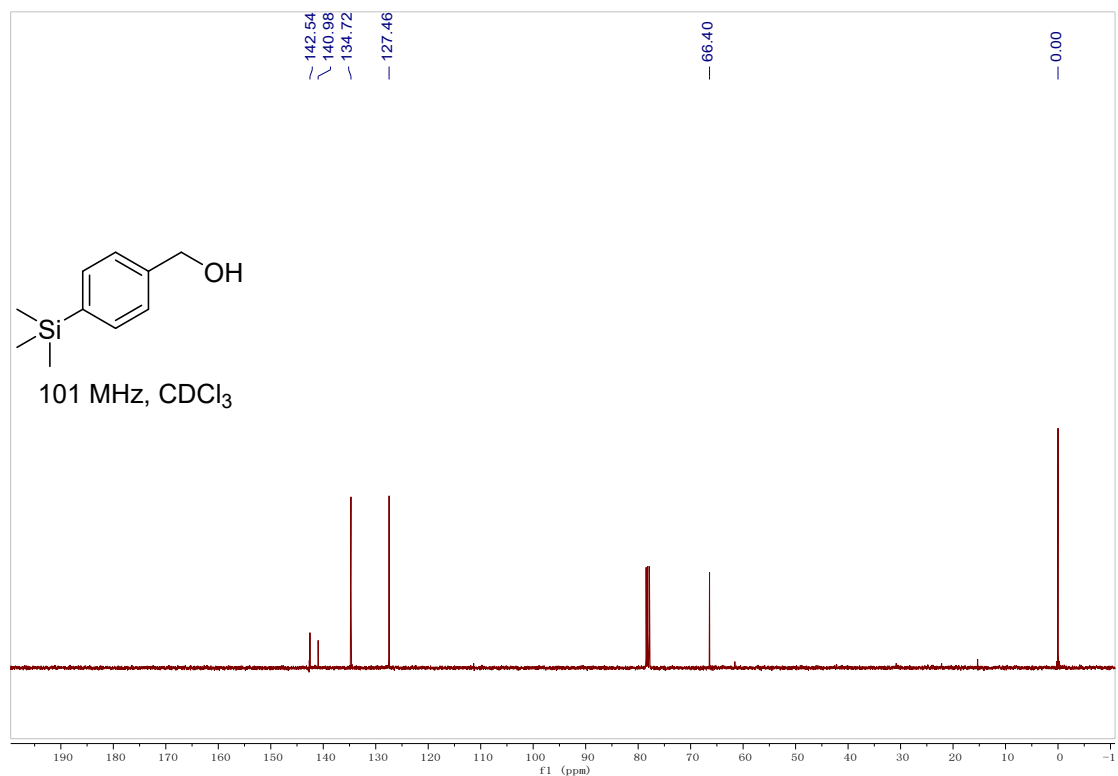

**(4-Methoxyphenyl)methanol (2l)**

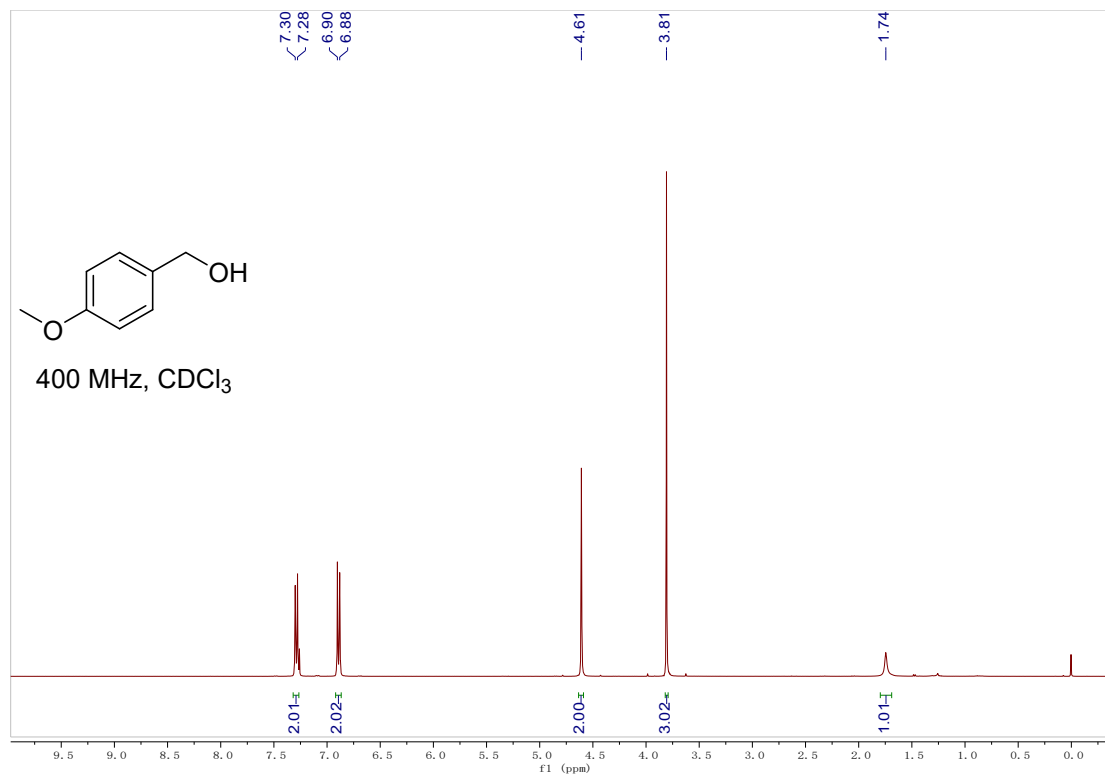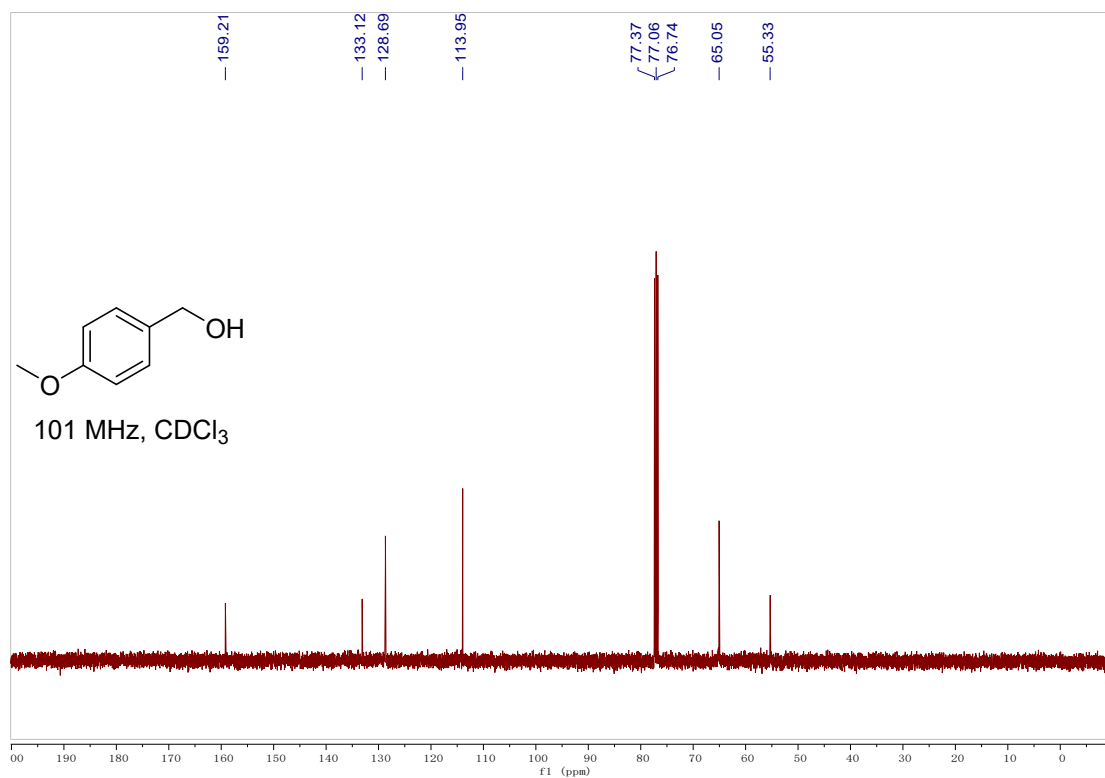

**(3,5-dimethoxyphenyl)methanol (2m)**

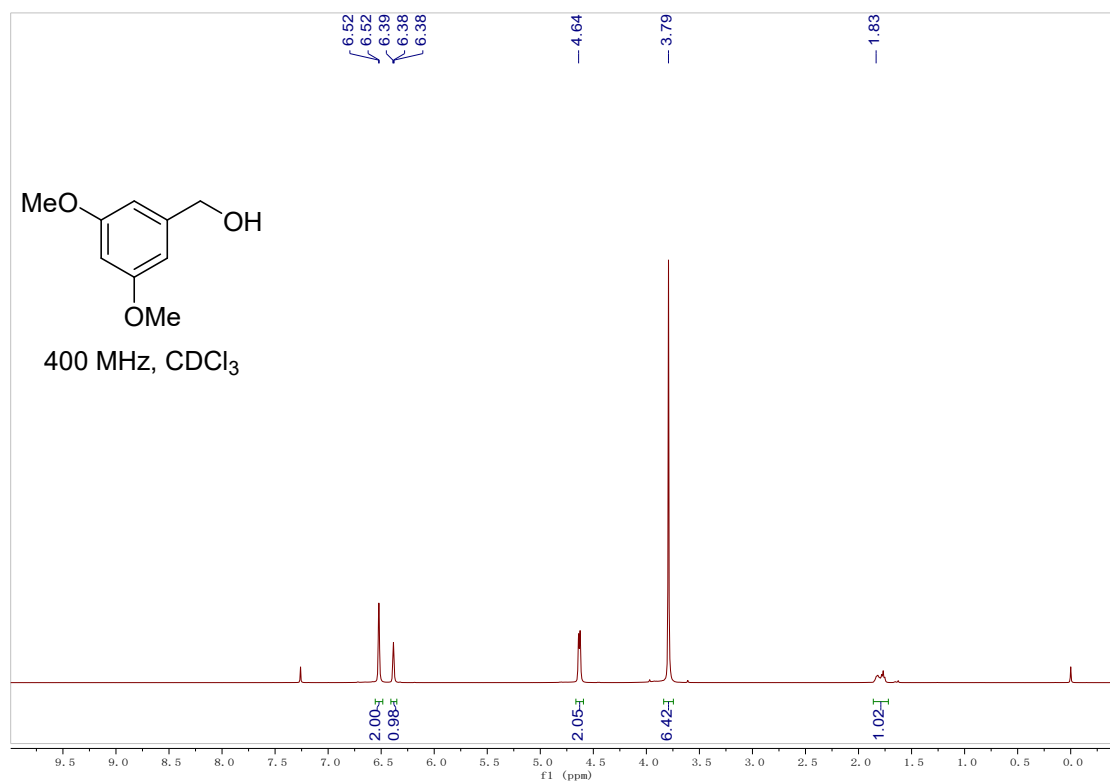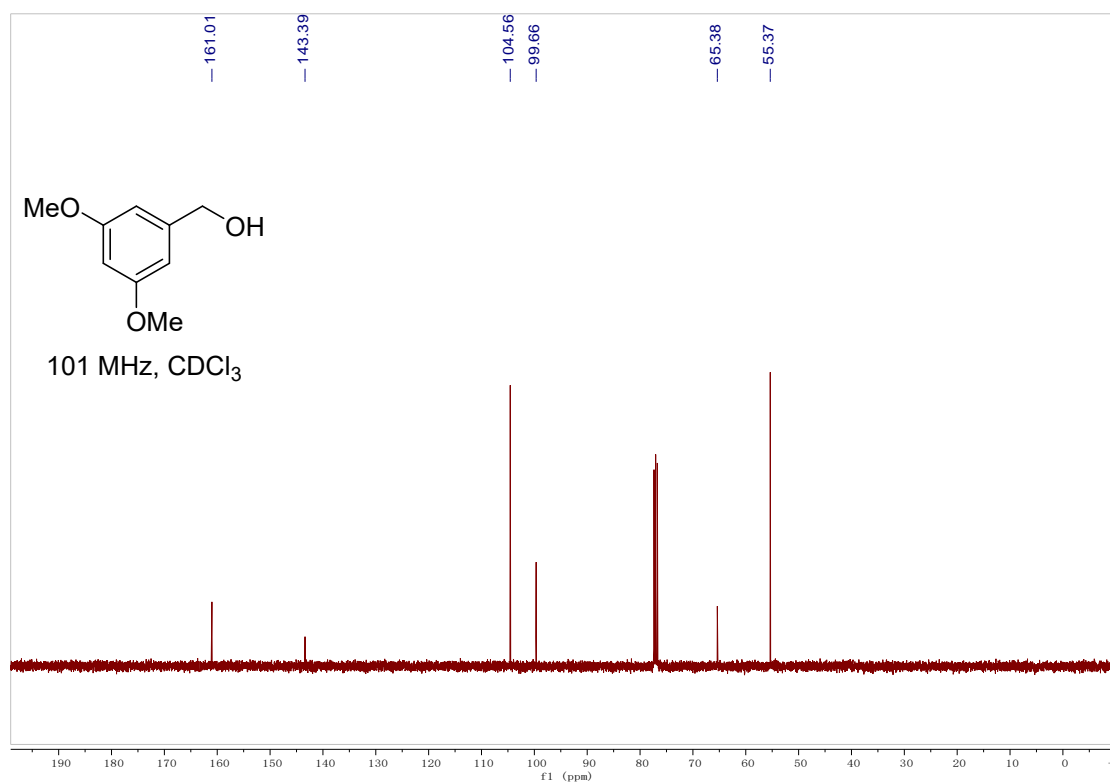

**(4-Phenoxyphenyl)methanol (2n)**

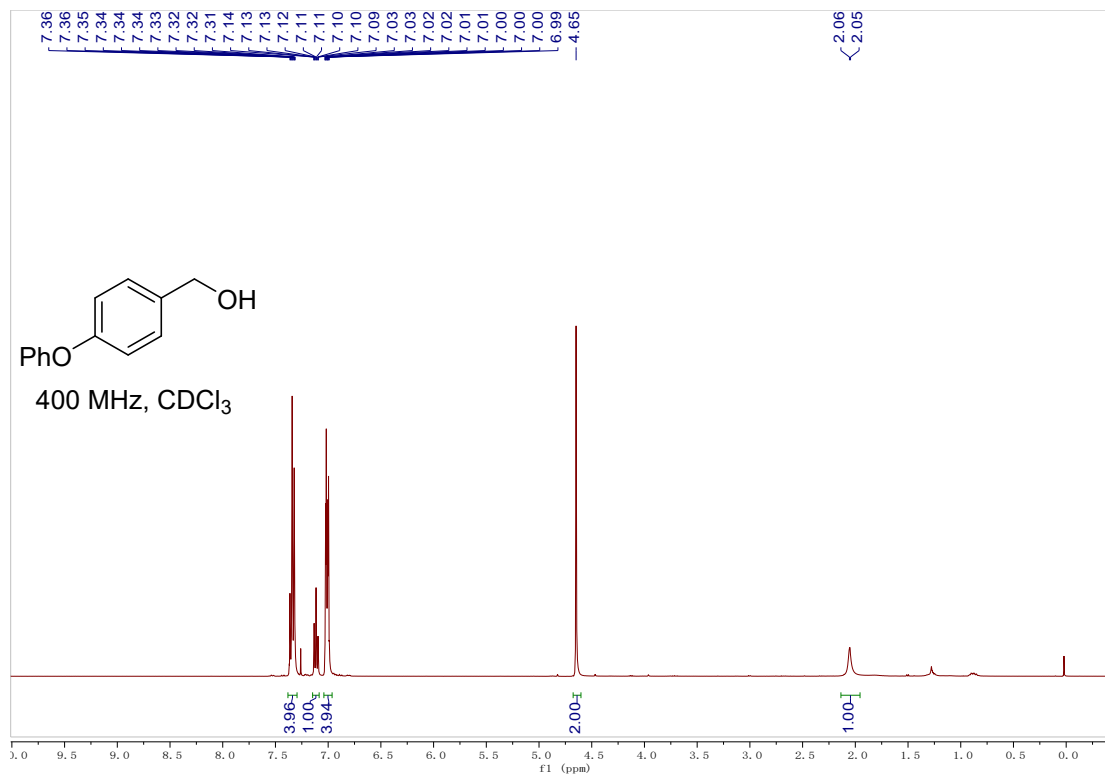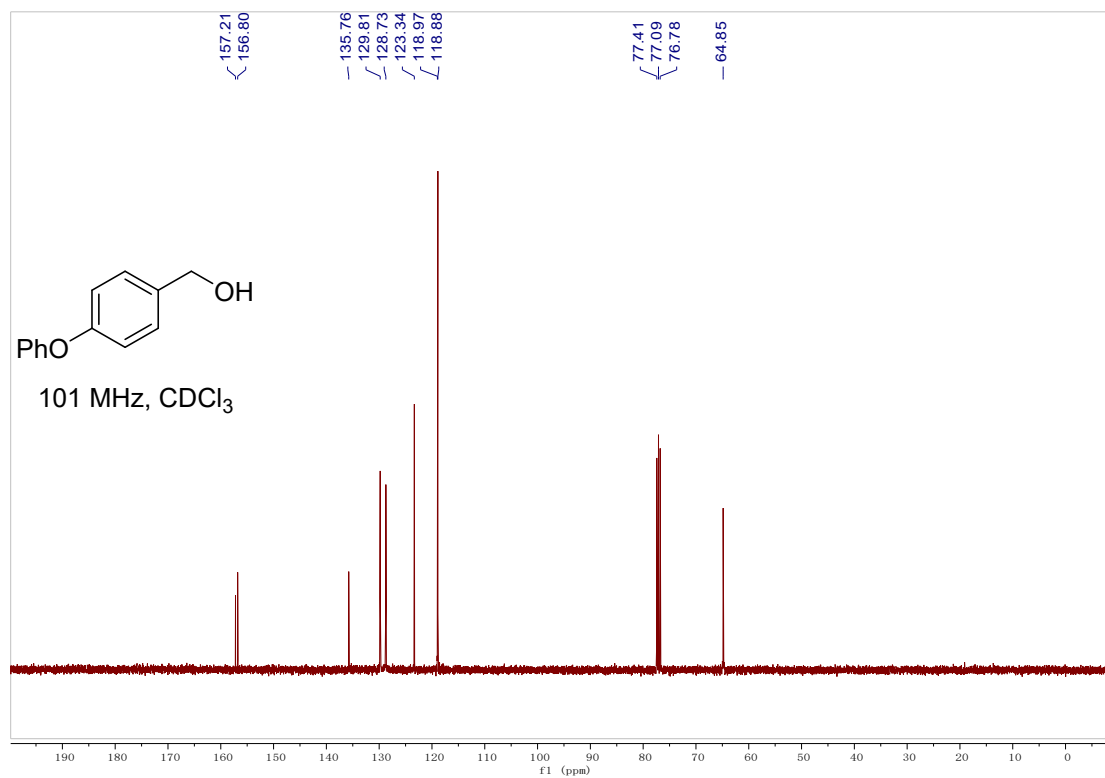

**(4-(Benzyloxy)phenyl)methanol (2o)**

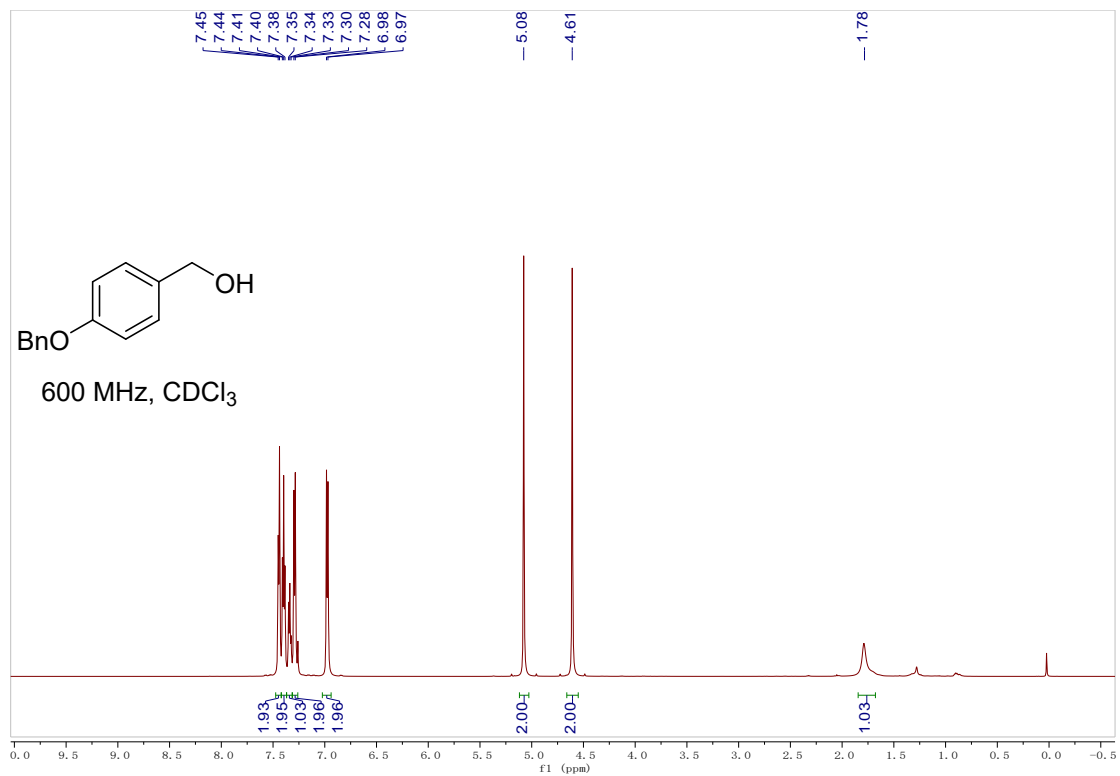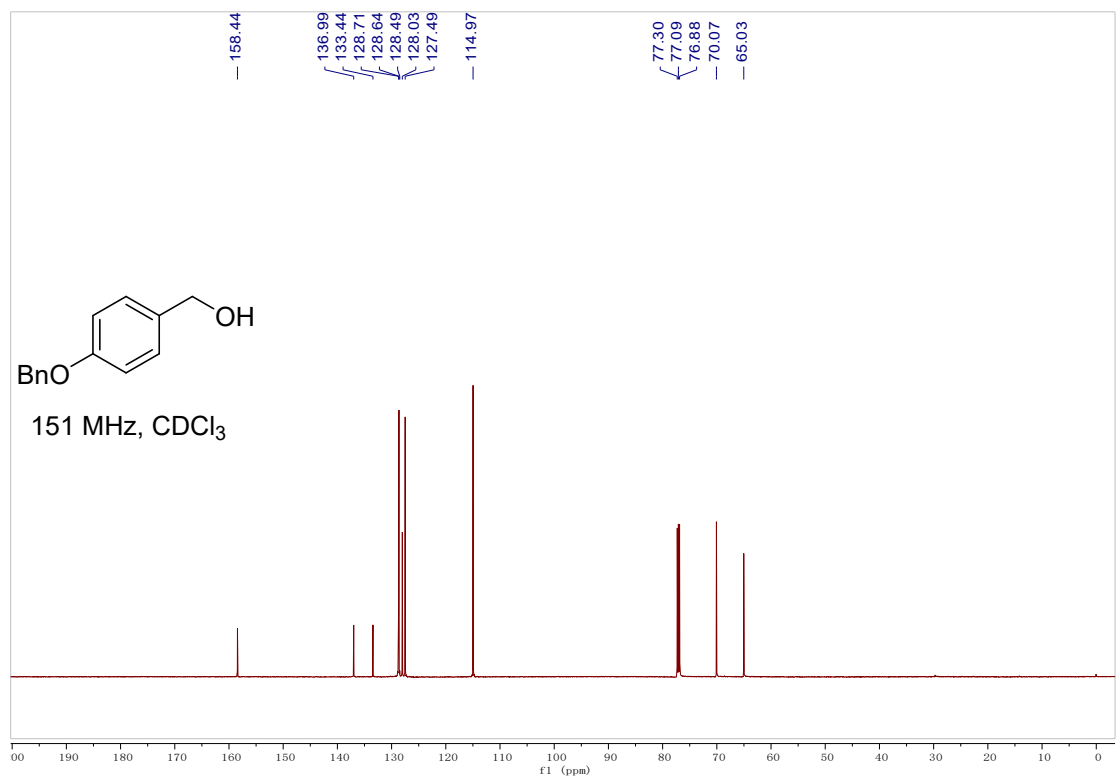

### 4-(Hydroxymethyl)phenyl butyrate (2p)

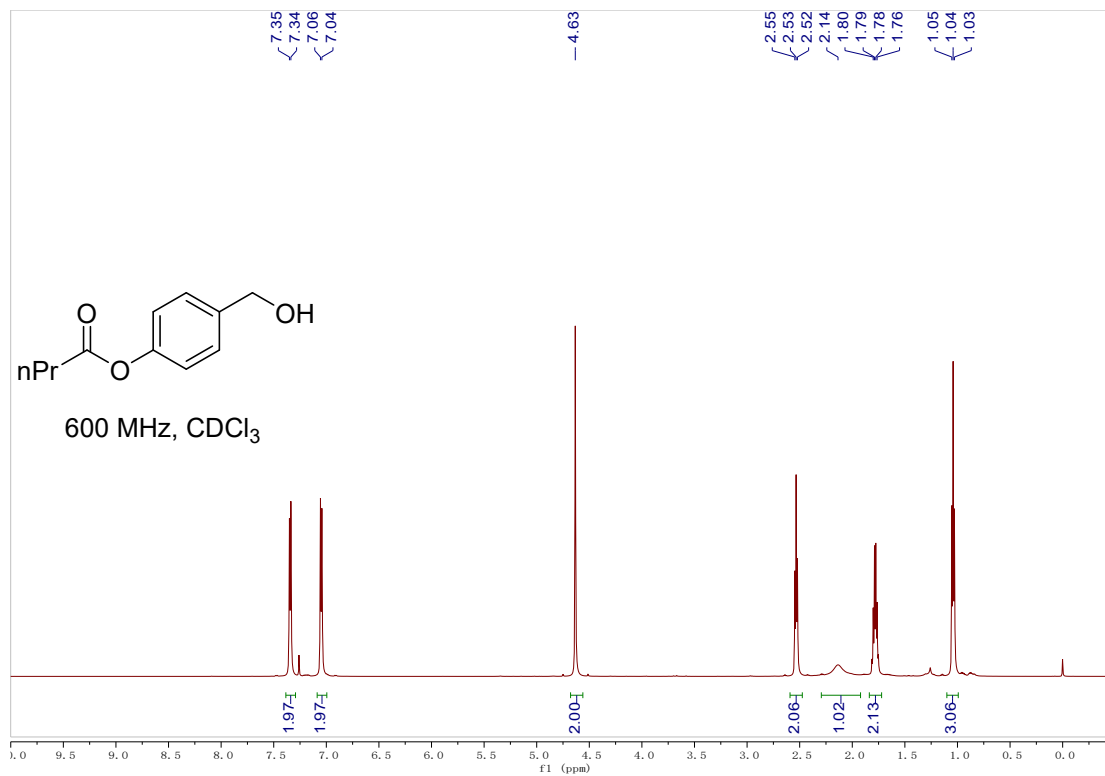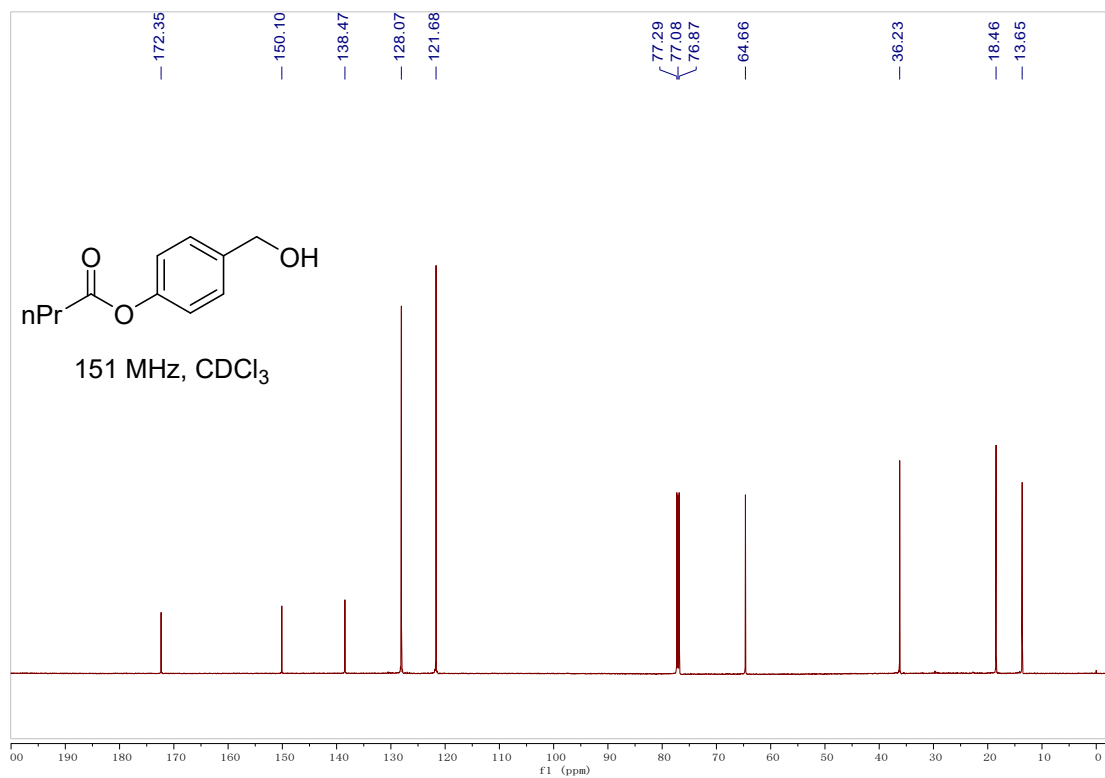

**(4-(Methylthio)phenyl)methanol (2q)**

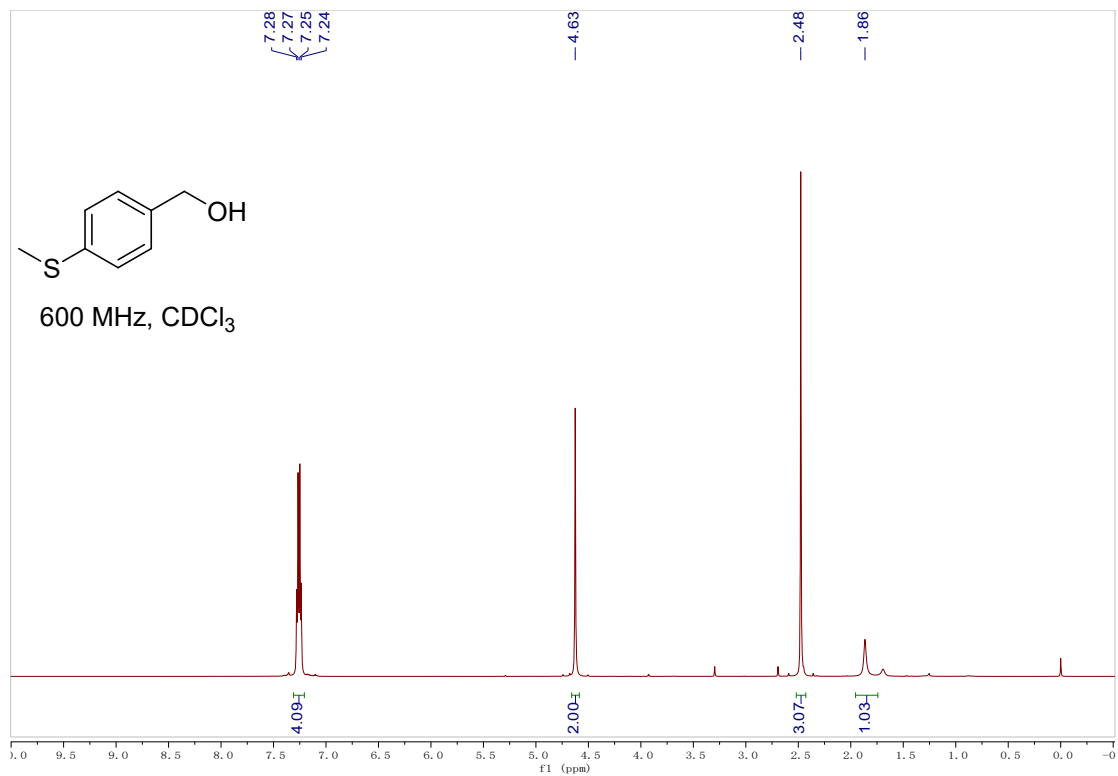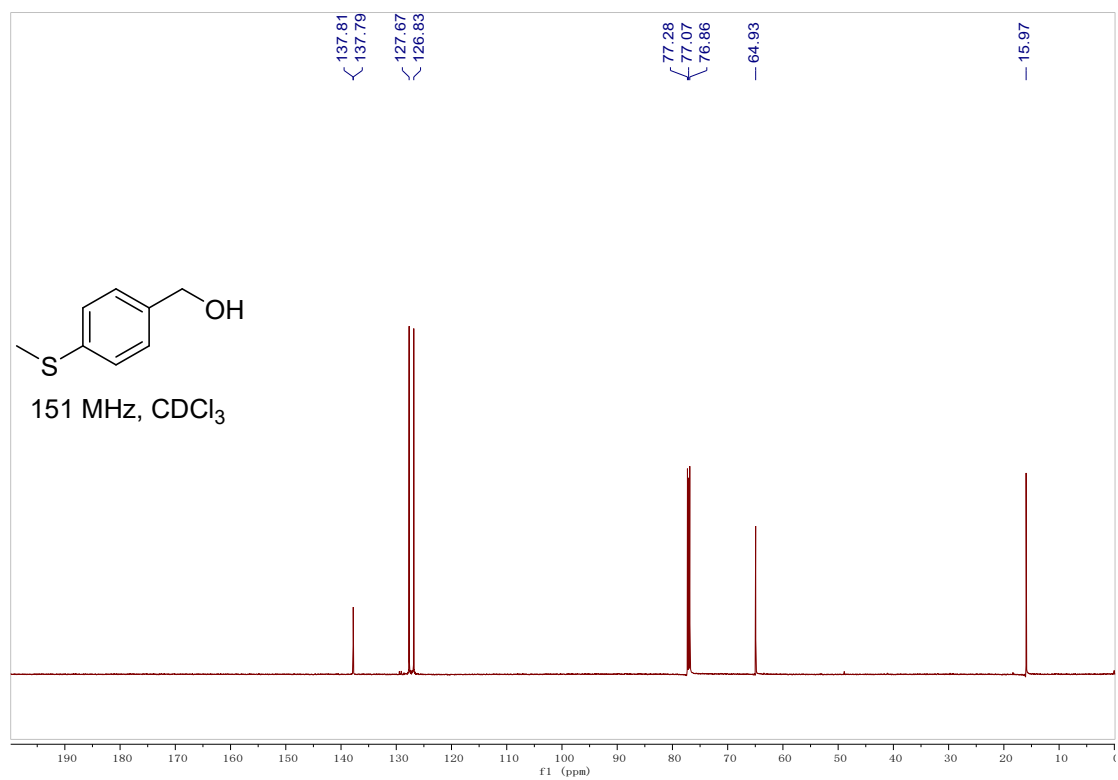



### N-(4-(Hydroxymethyl)phenyl)acetamide (2r)

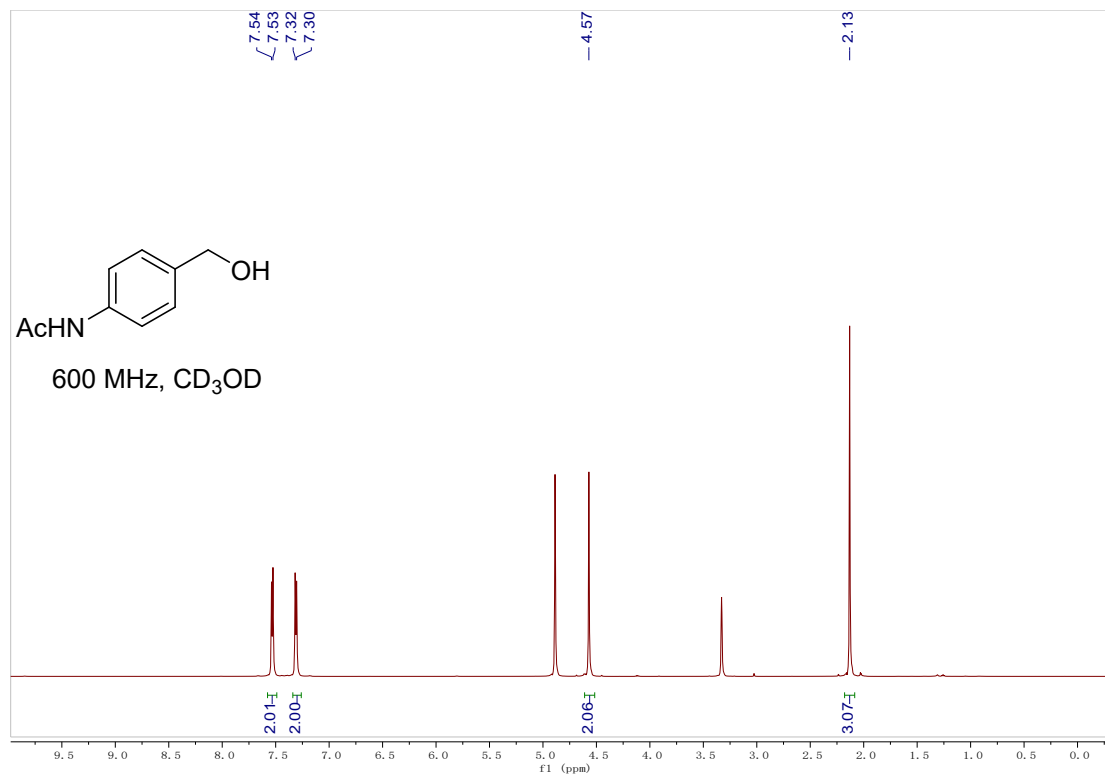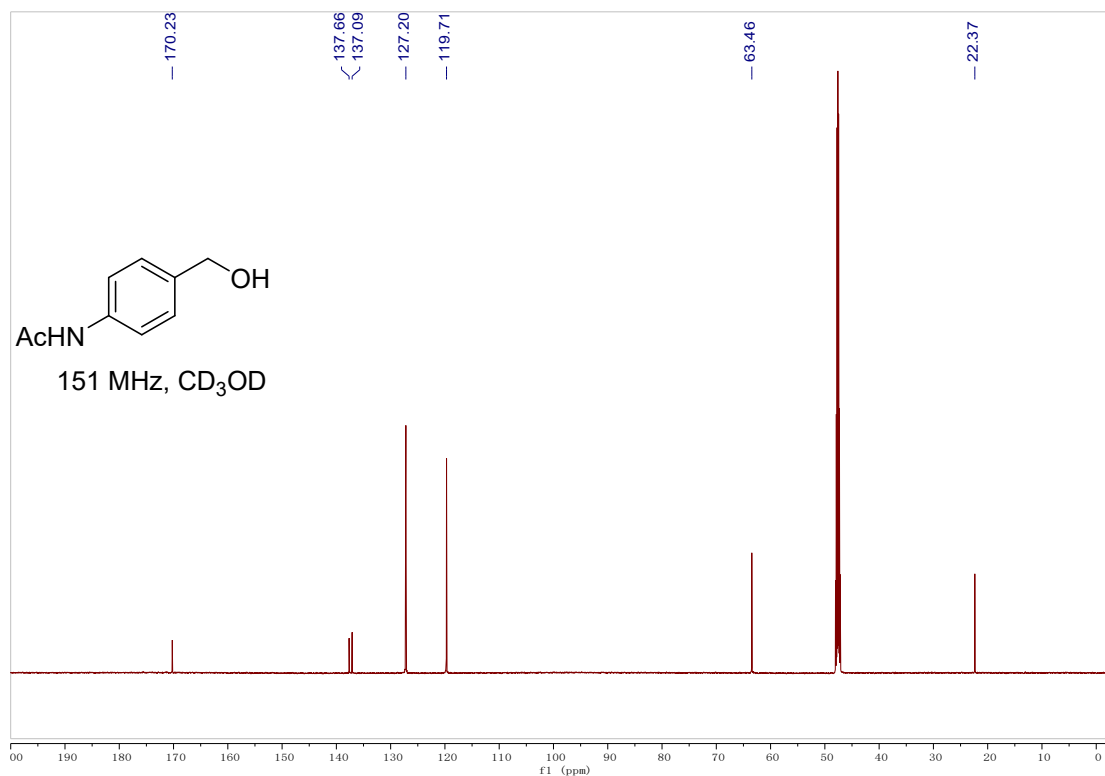

**(4-(1H-Imidazol-1-yl)phenyl)methanol (2s)**

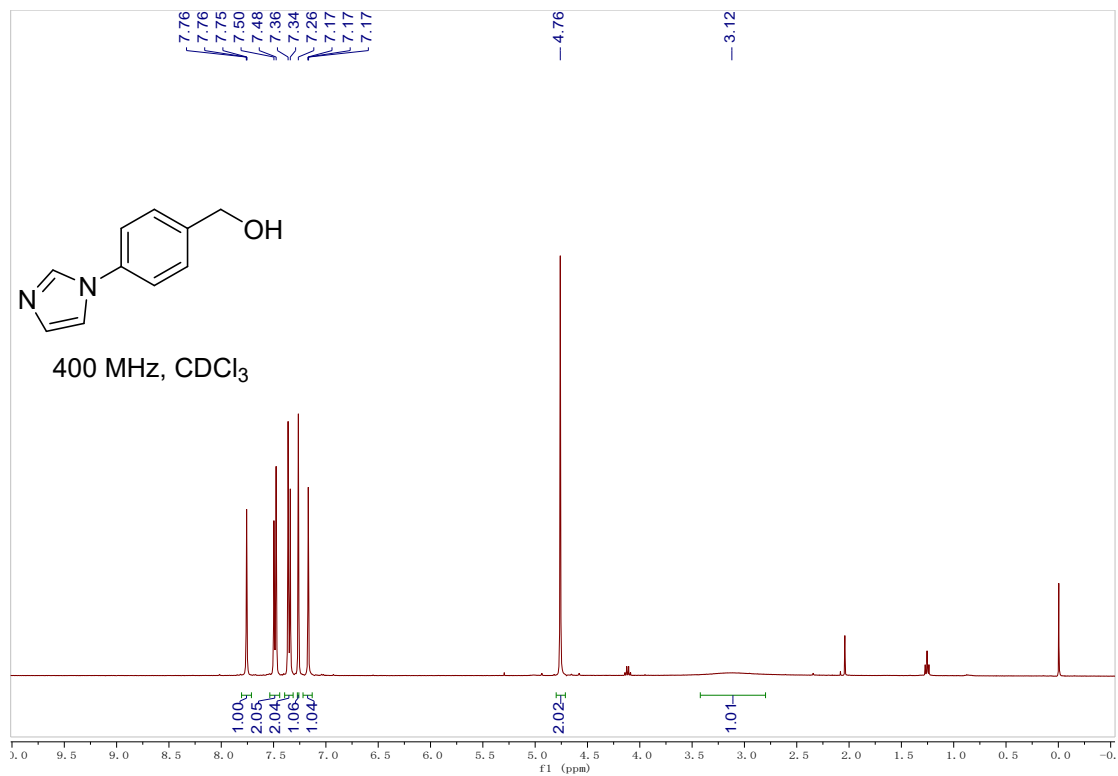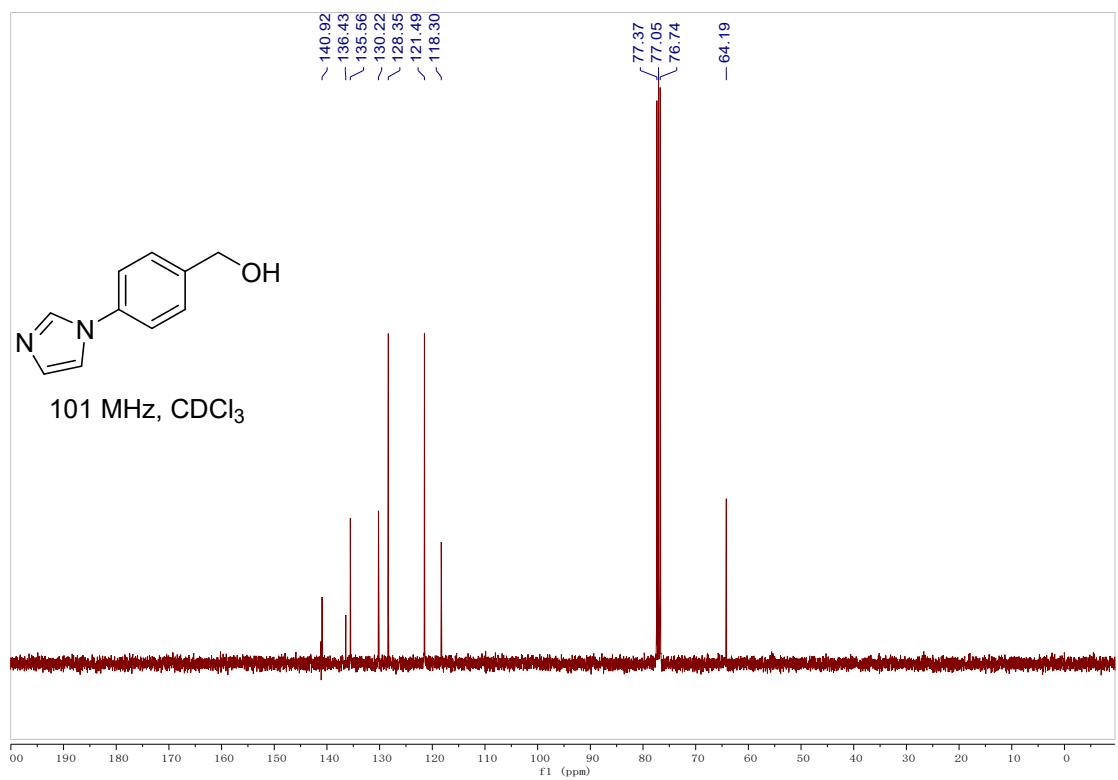

### Thiophen-2-ylmethanol (2t)

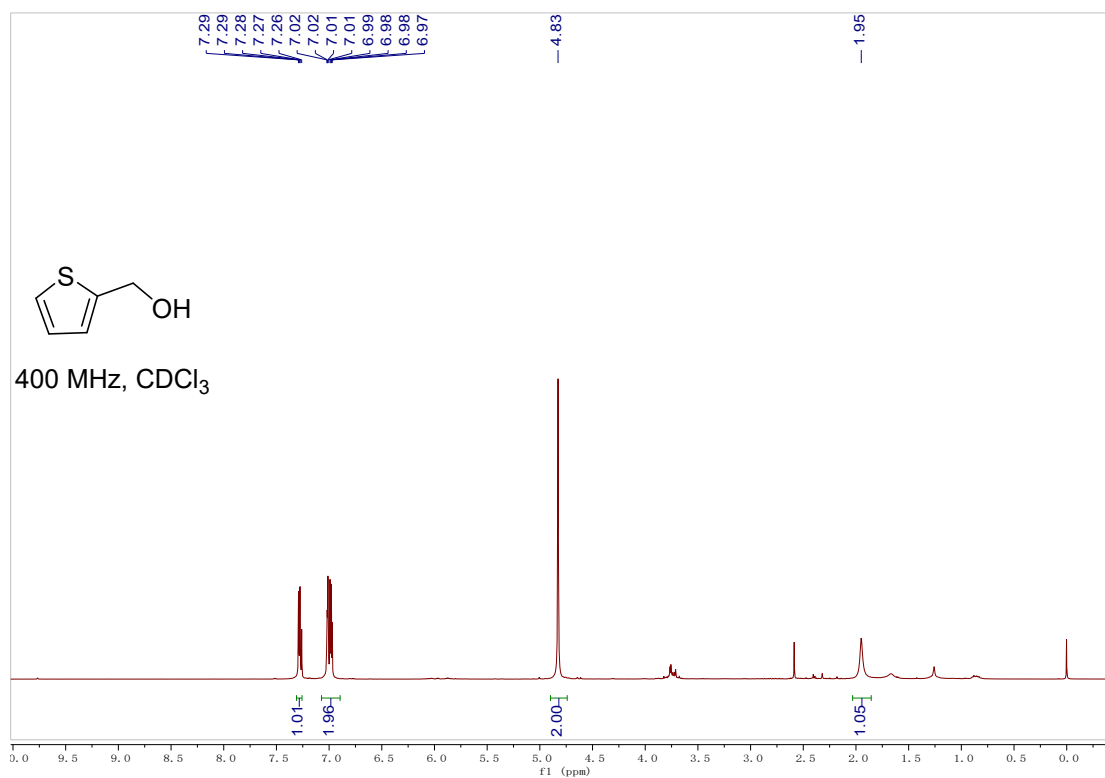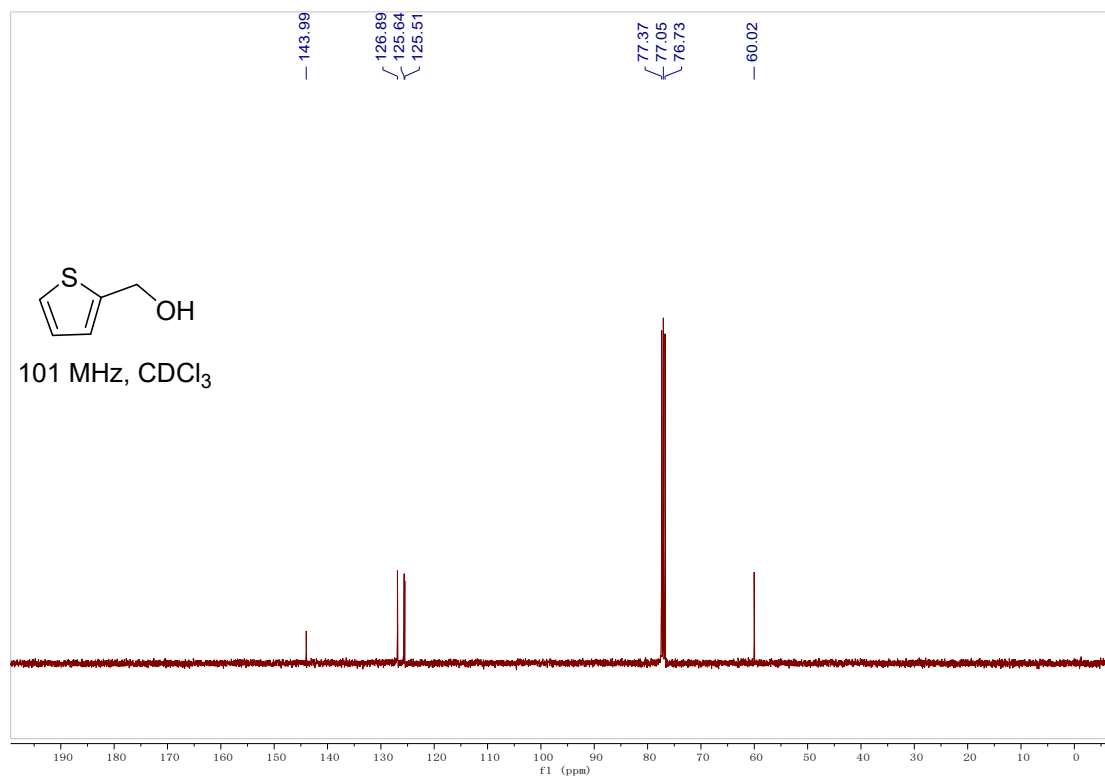

# Benzo[b]thiophen-2-ylmethanol (2u)

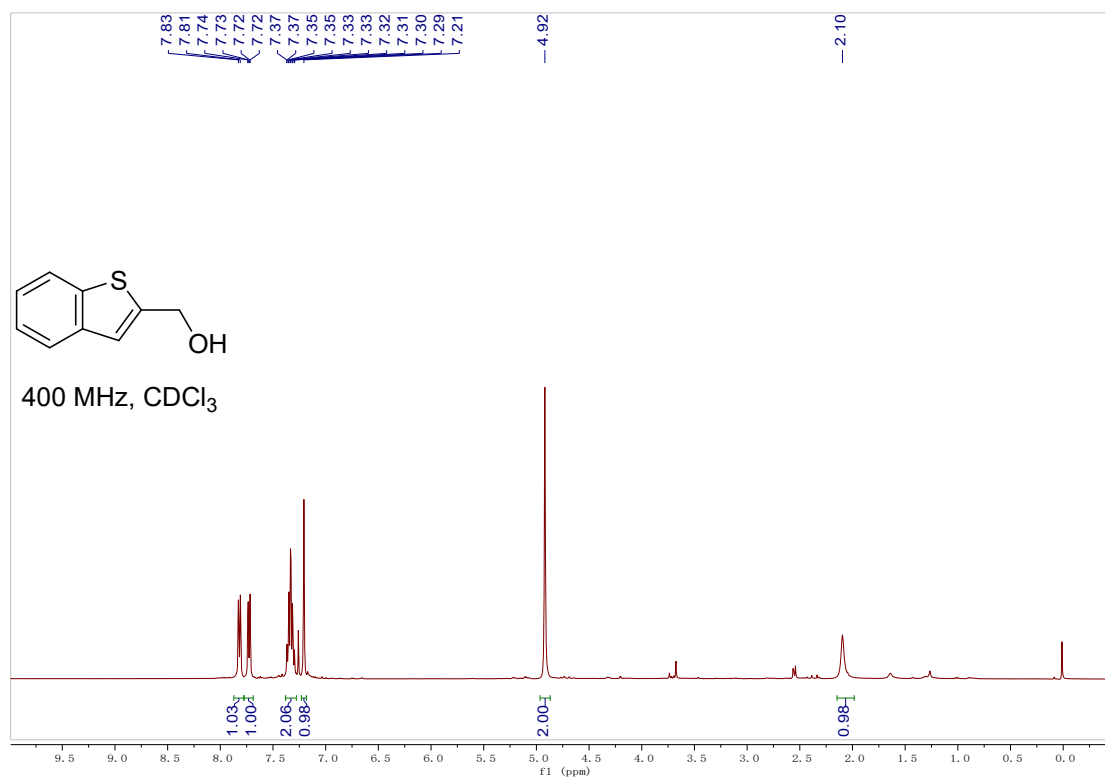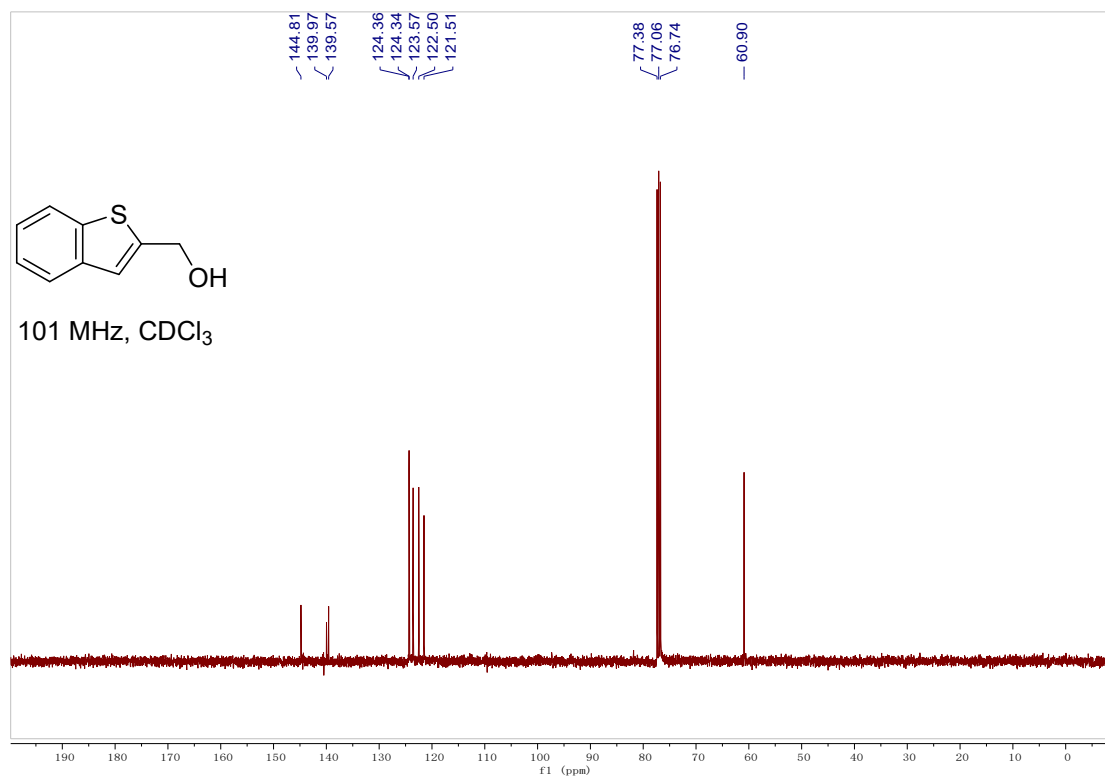

# Furan-2-ylmethanol (2v)

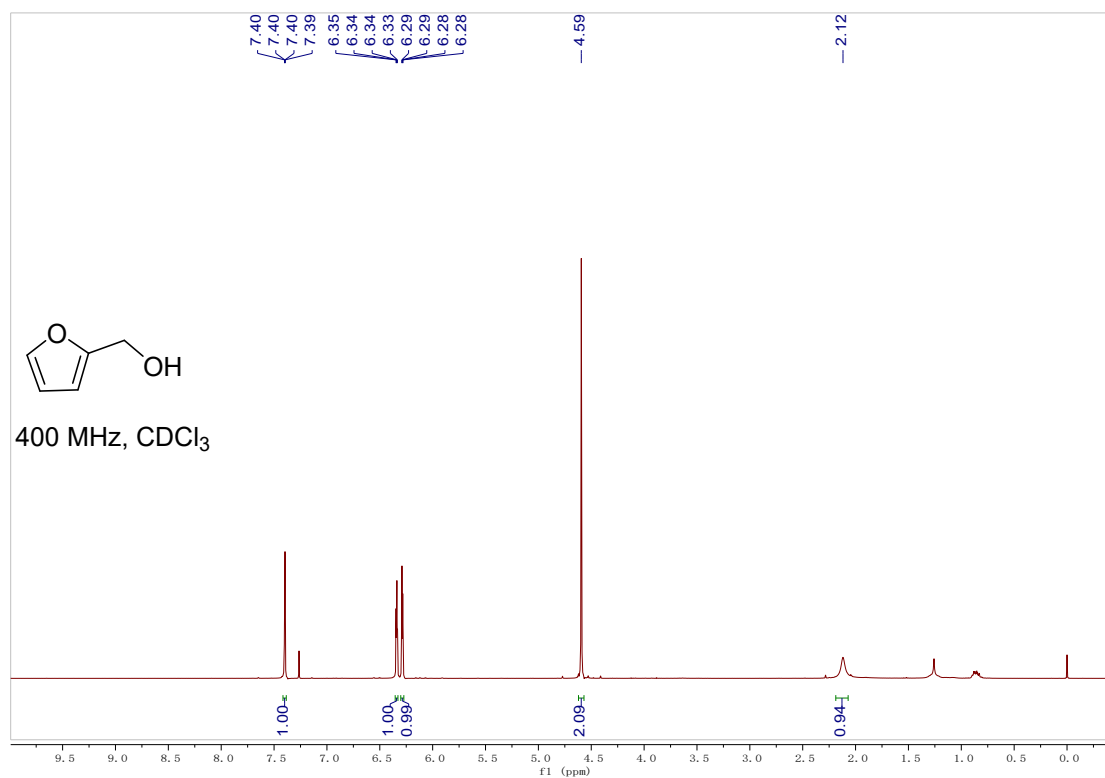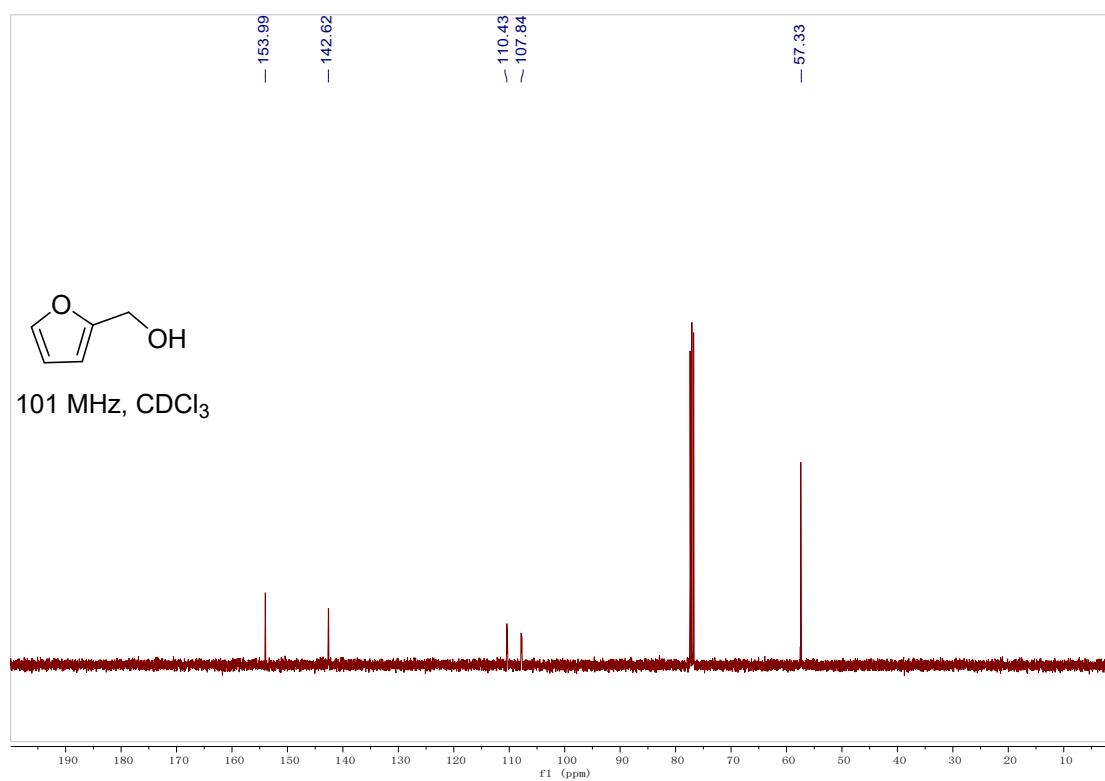

### Benzofuran-2-ylmethanol (2w)

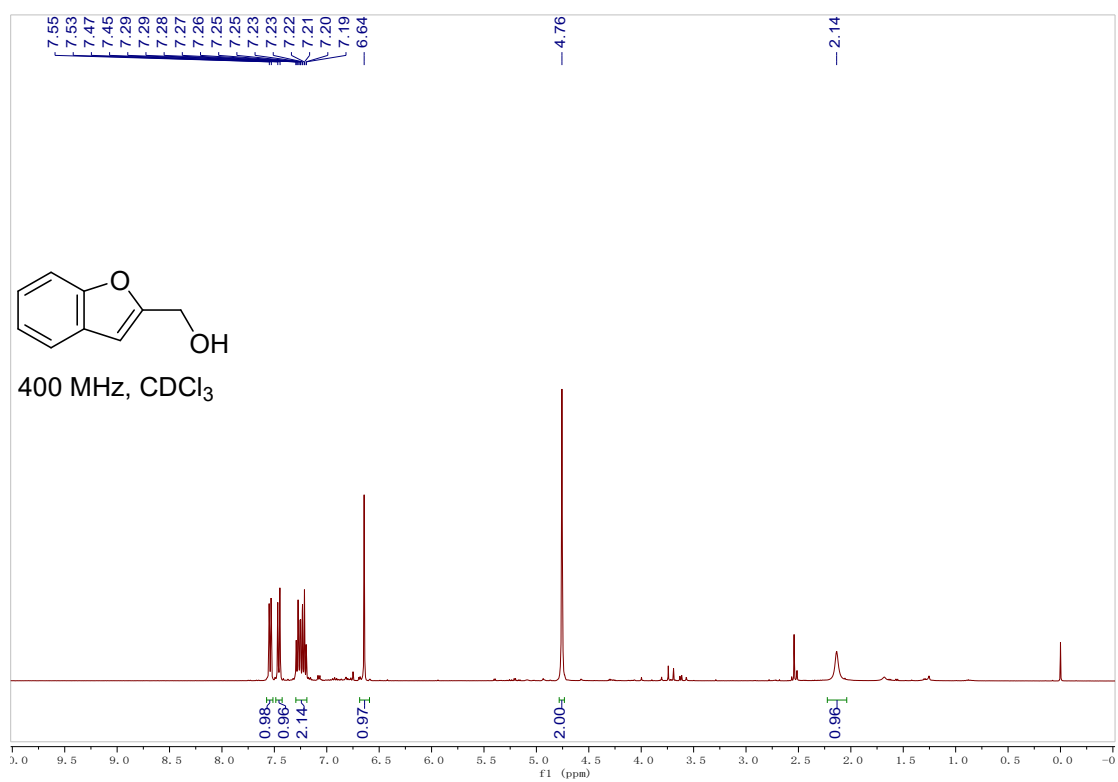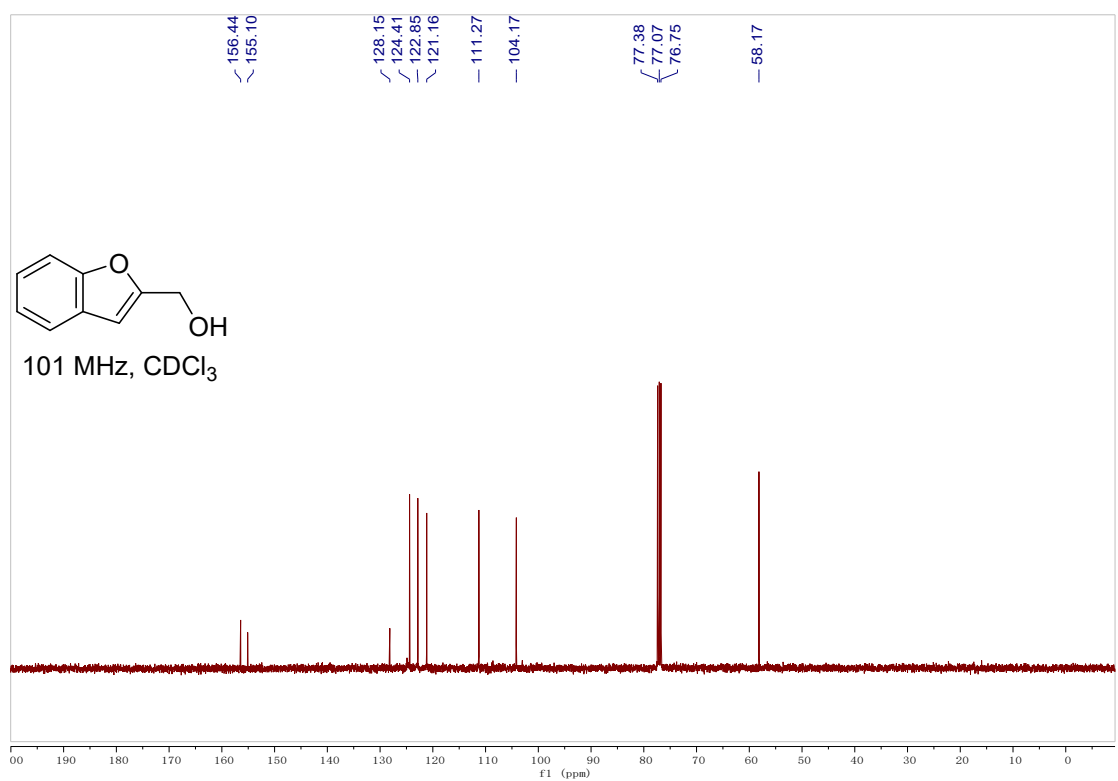

**(1-Methyl-1H-imidazol-2-yl)methanol (2x)**

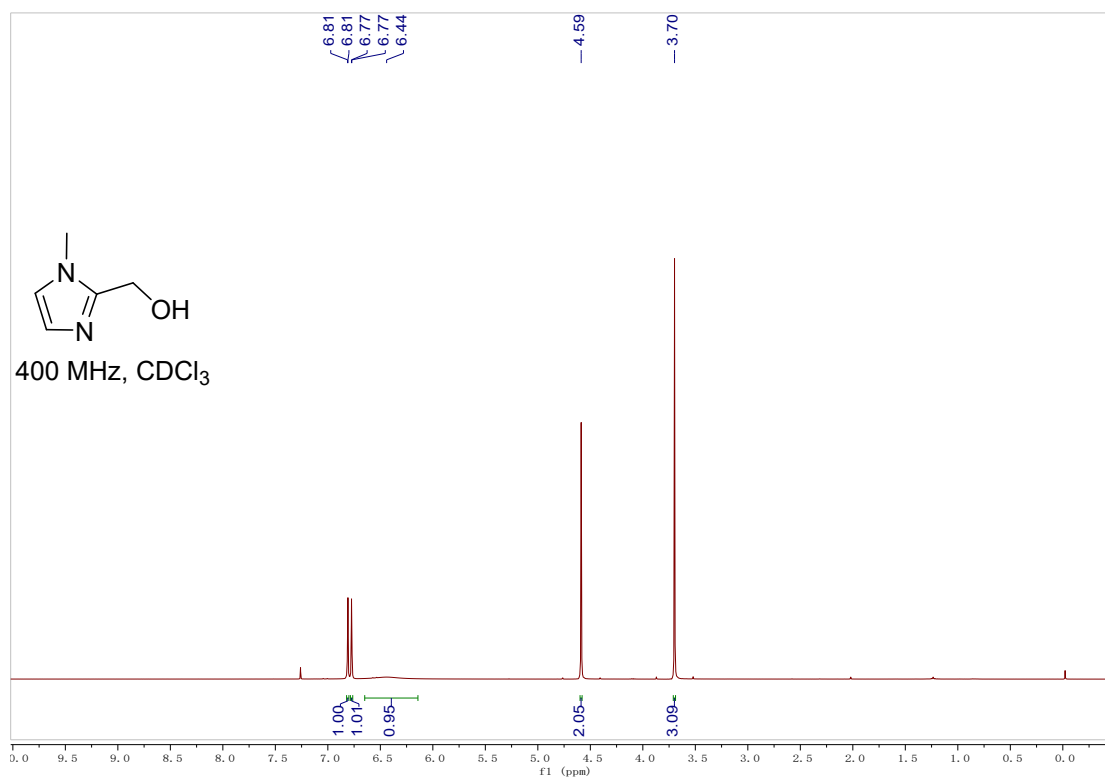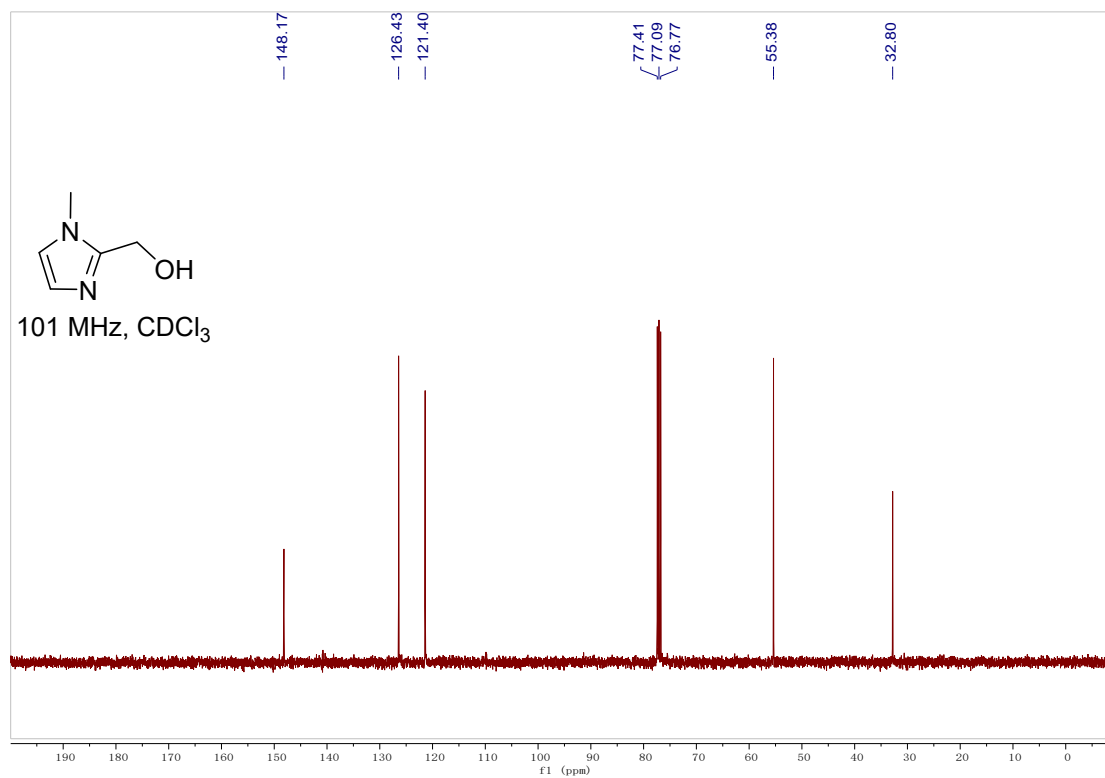

2-(hydroxymethyl)phenyl acetate (2y)

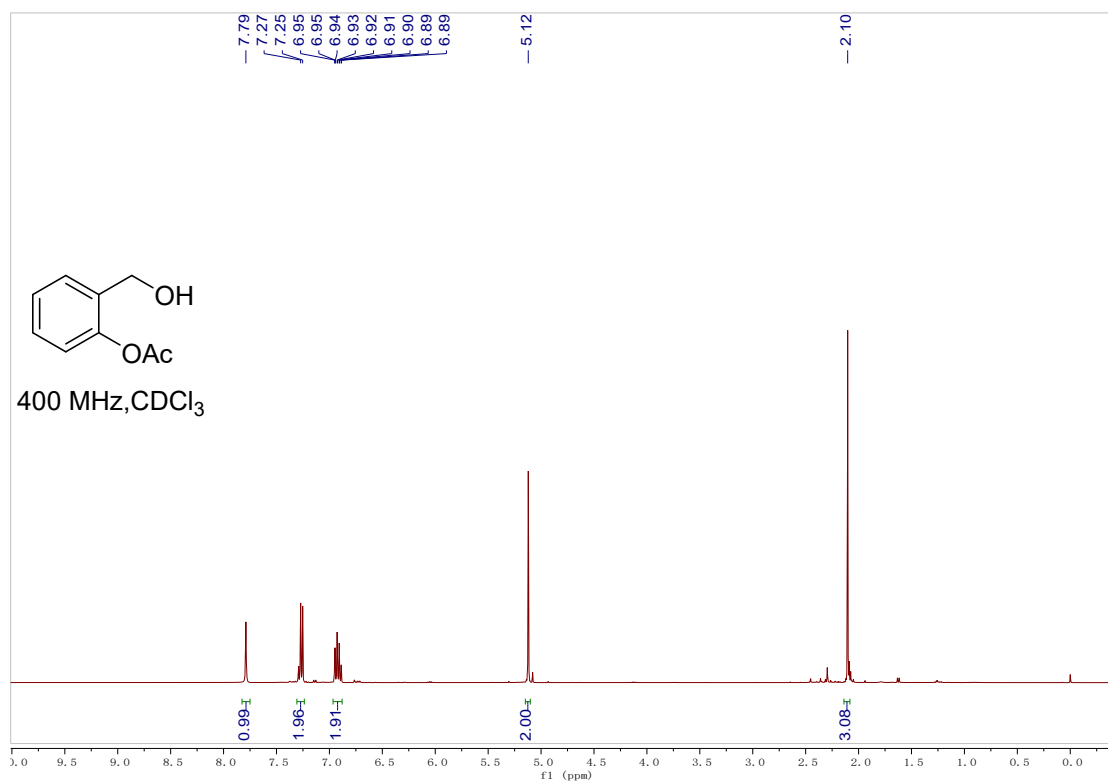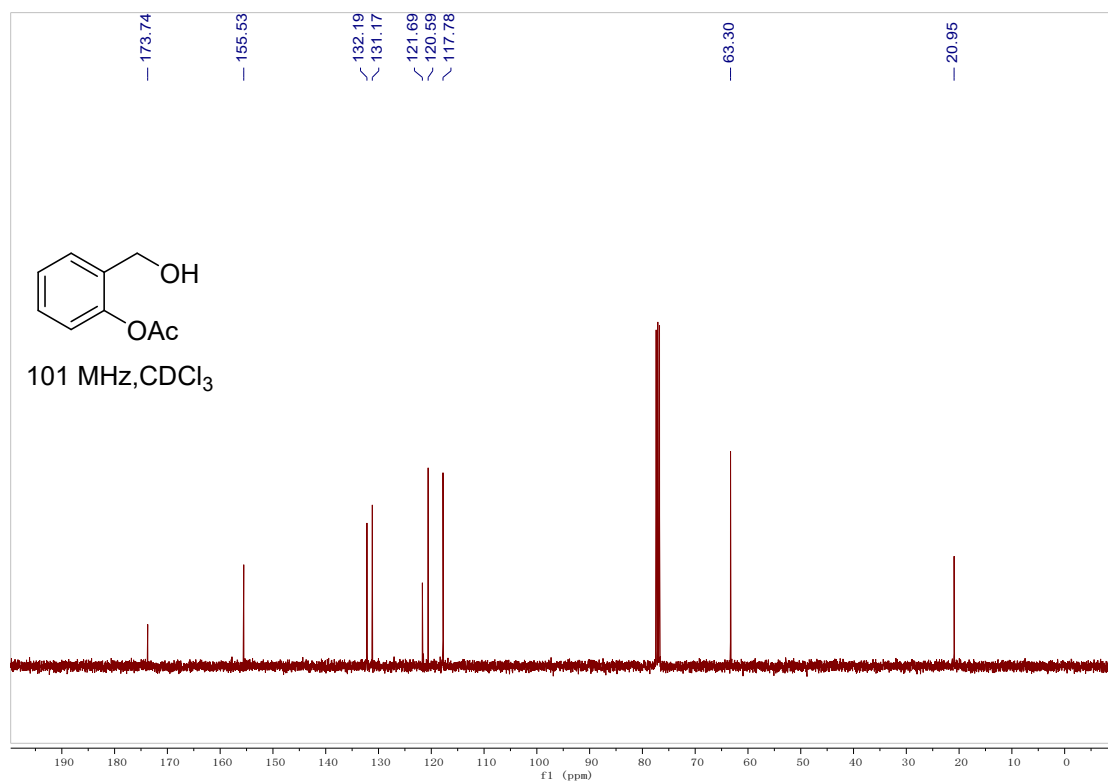



### 3-(Hydroxymethyl)benzonitrile (2aa)

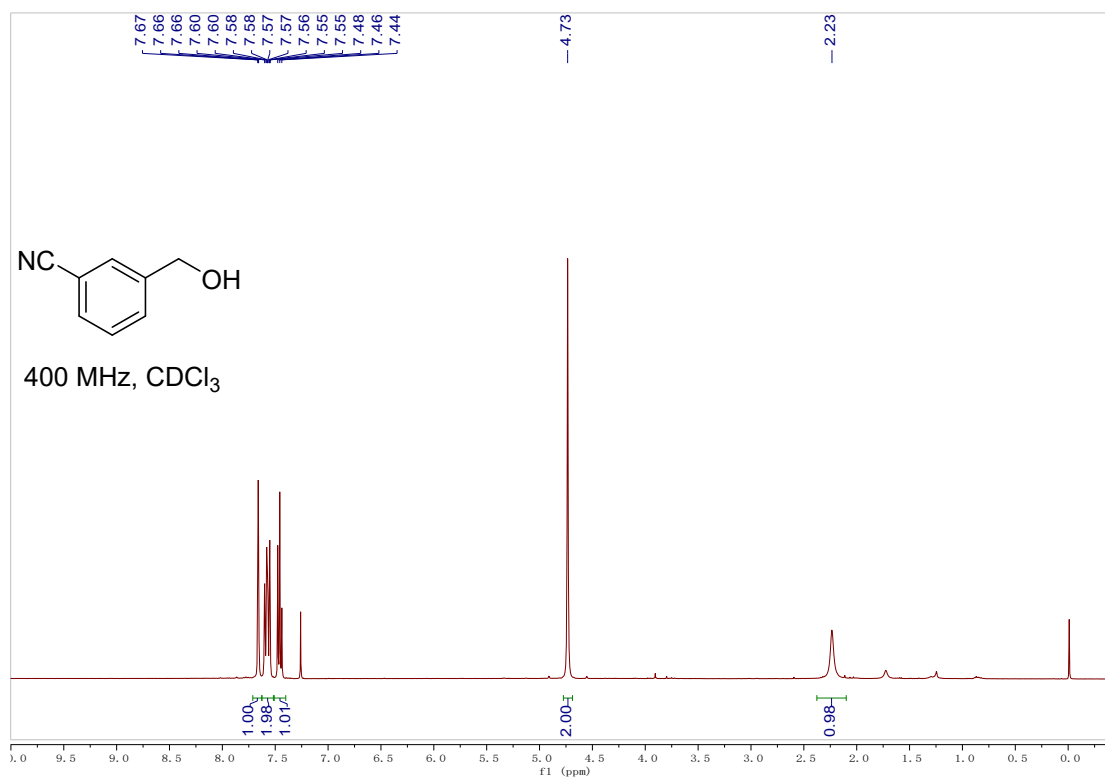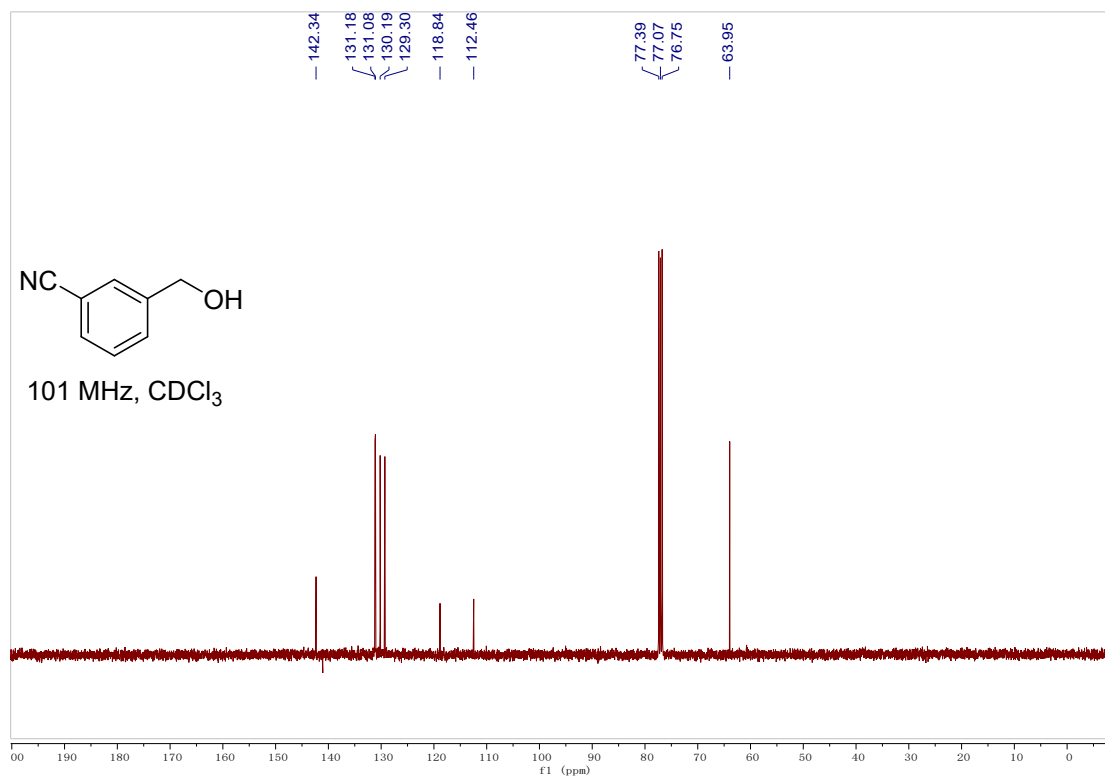

### Methyl 3-(hydroxymethyl)benzoate (2ab)

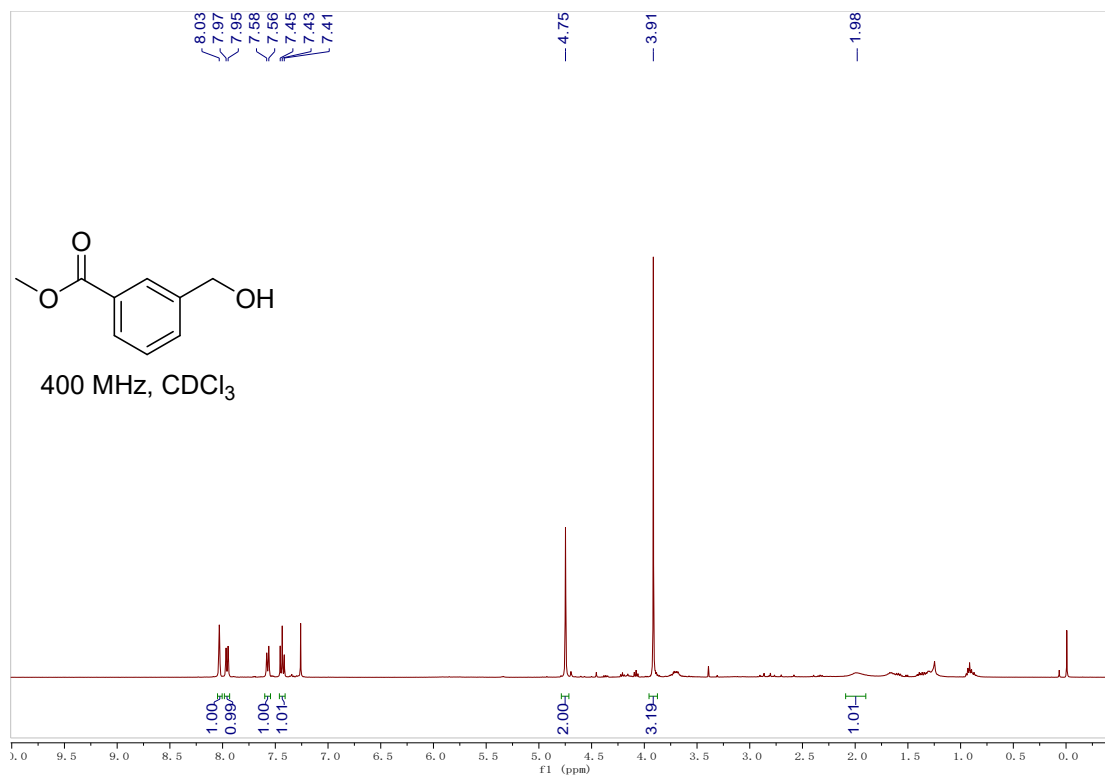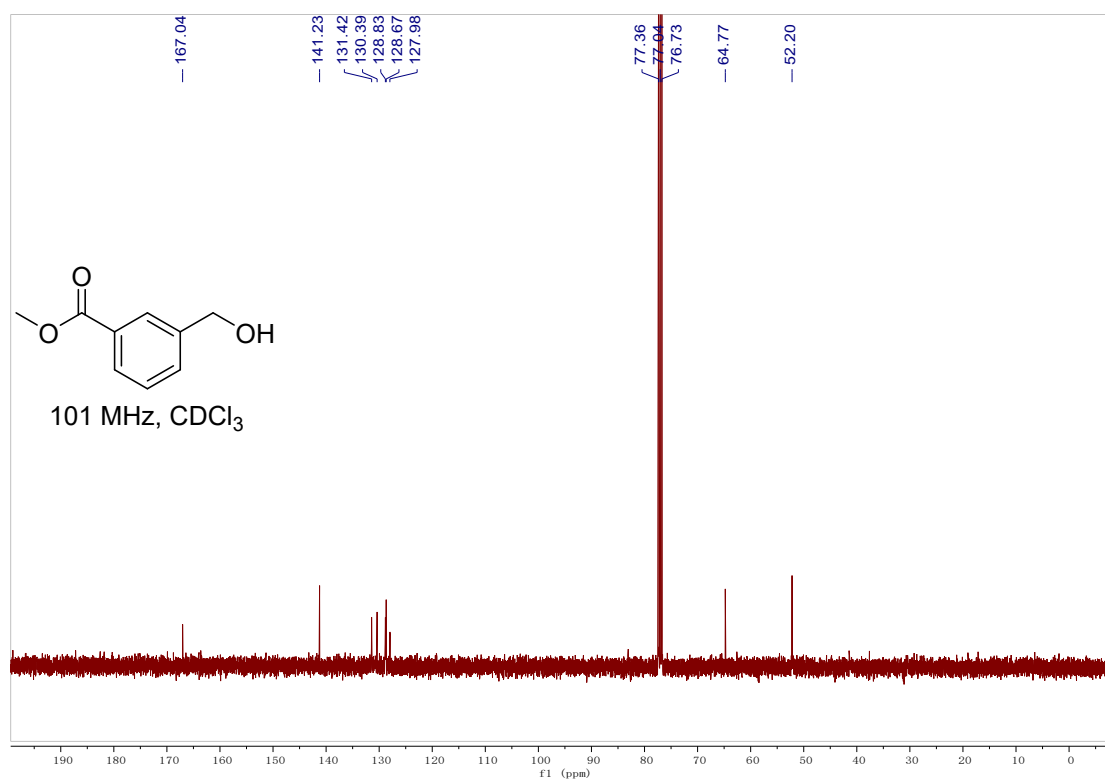

**(4-Fluorophenyl)methanol (2ac)**

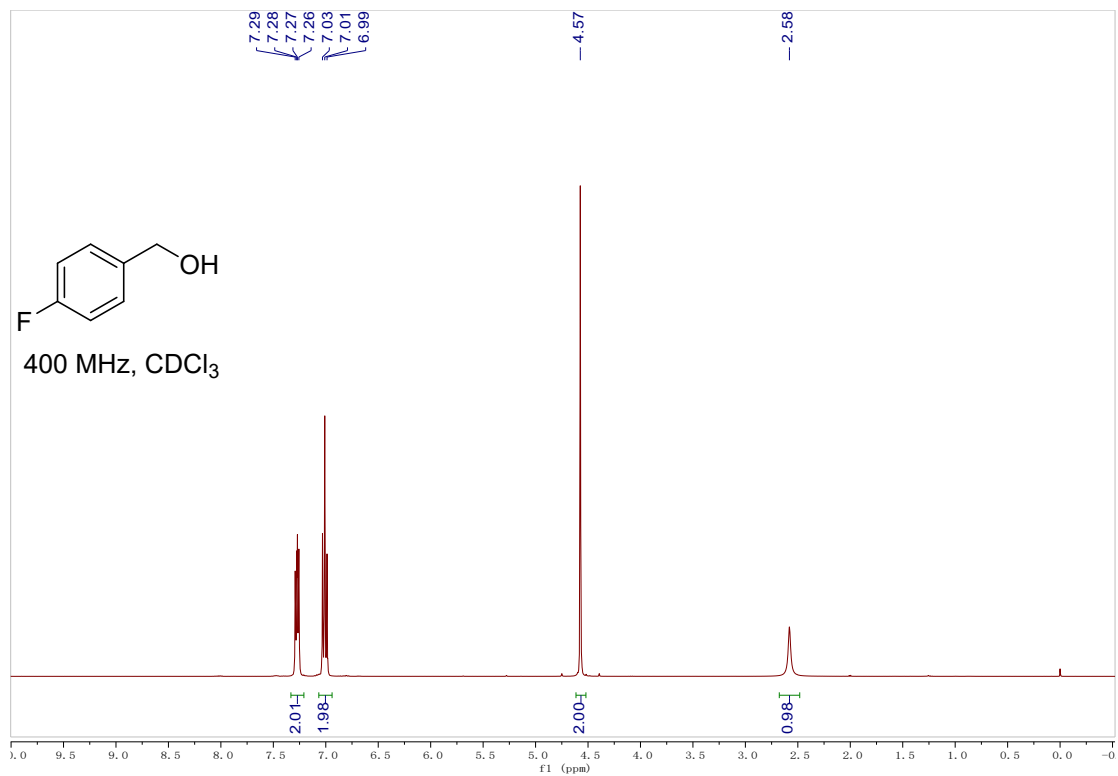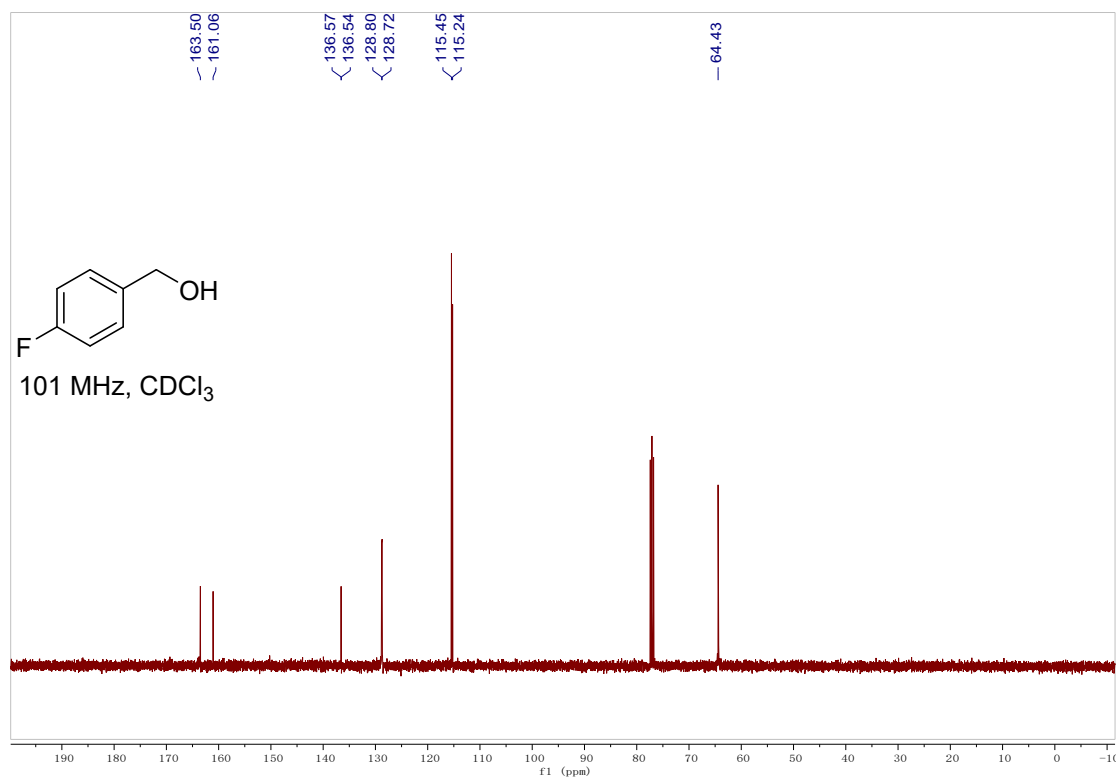

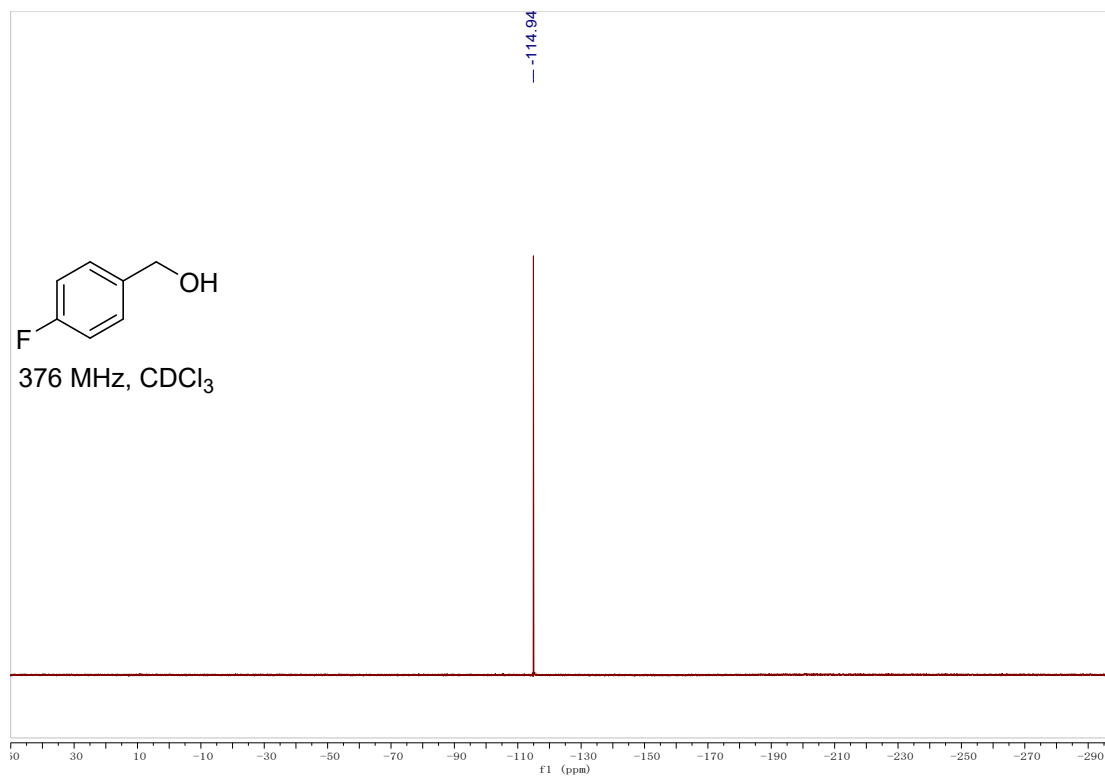

**(3-Chlorophenyl)methanol (2ad)**

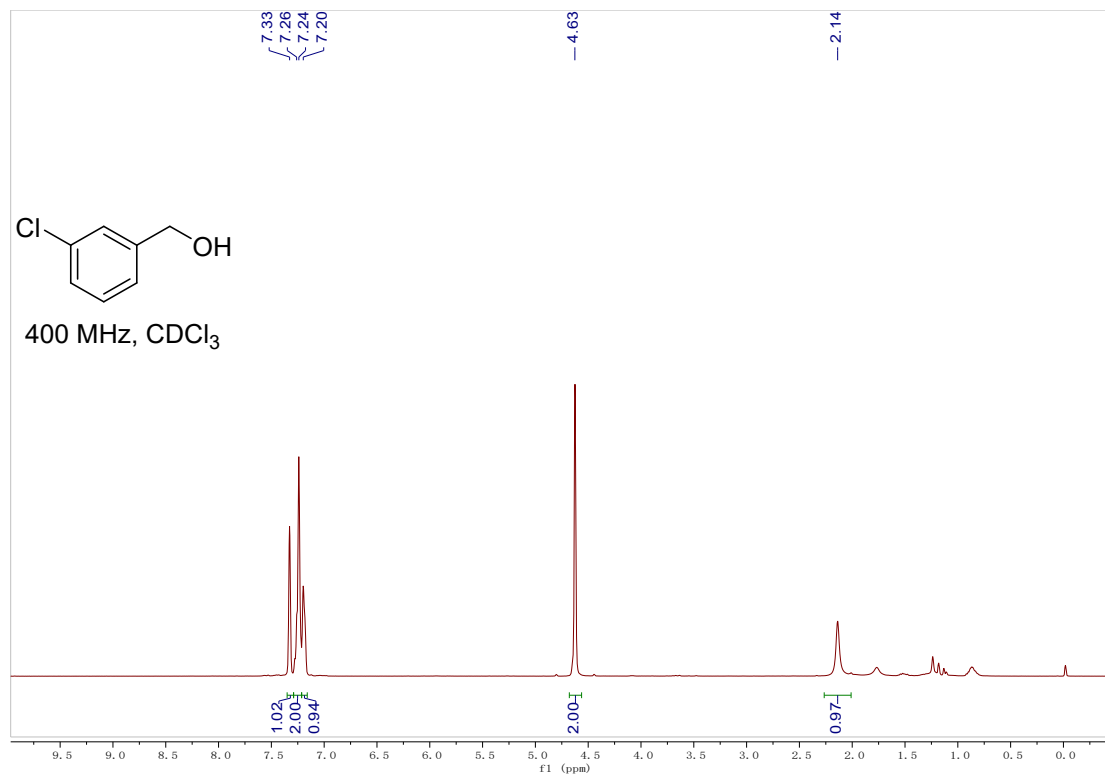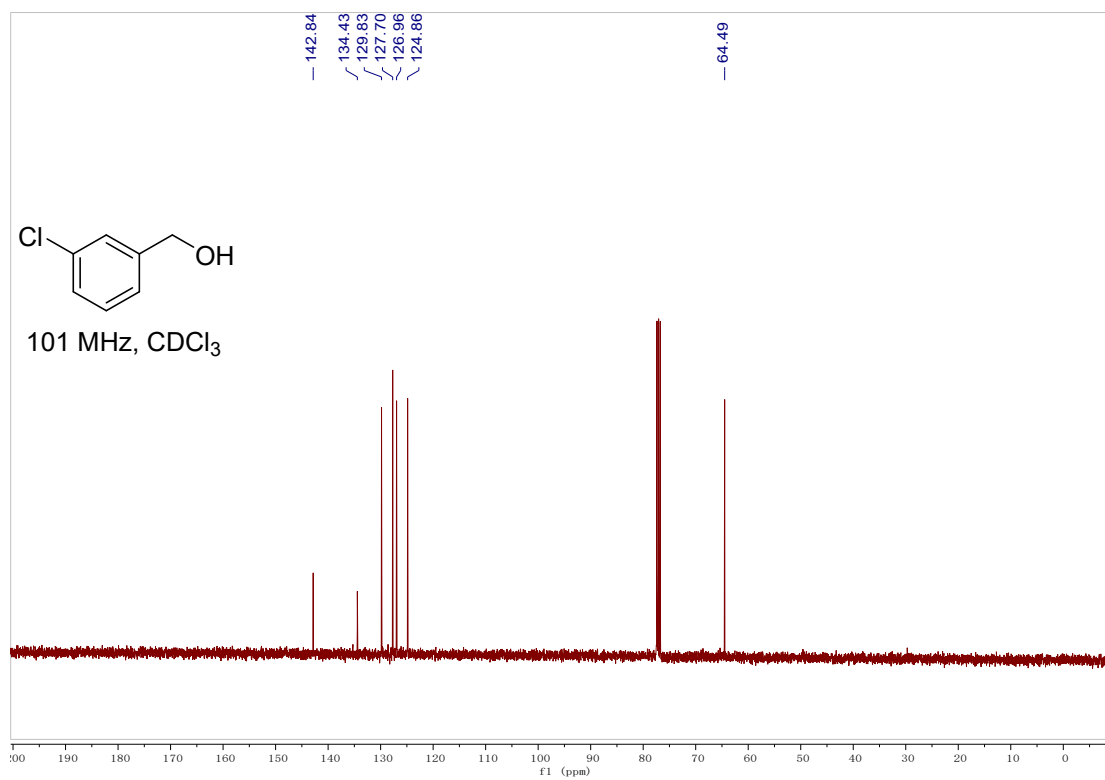

**(4-Chlorophenyl)methanol (2ae)**

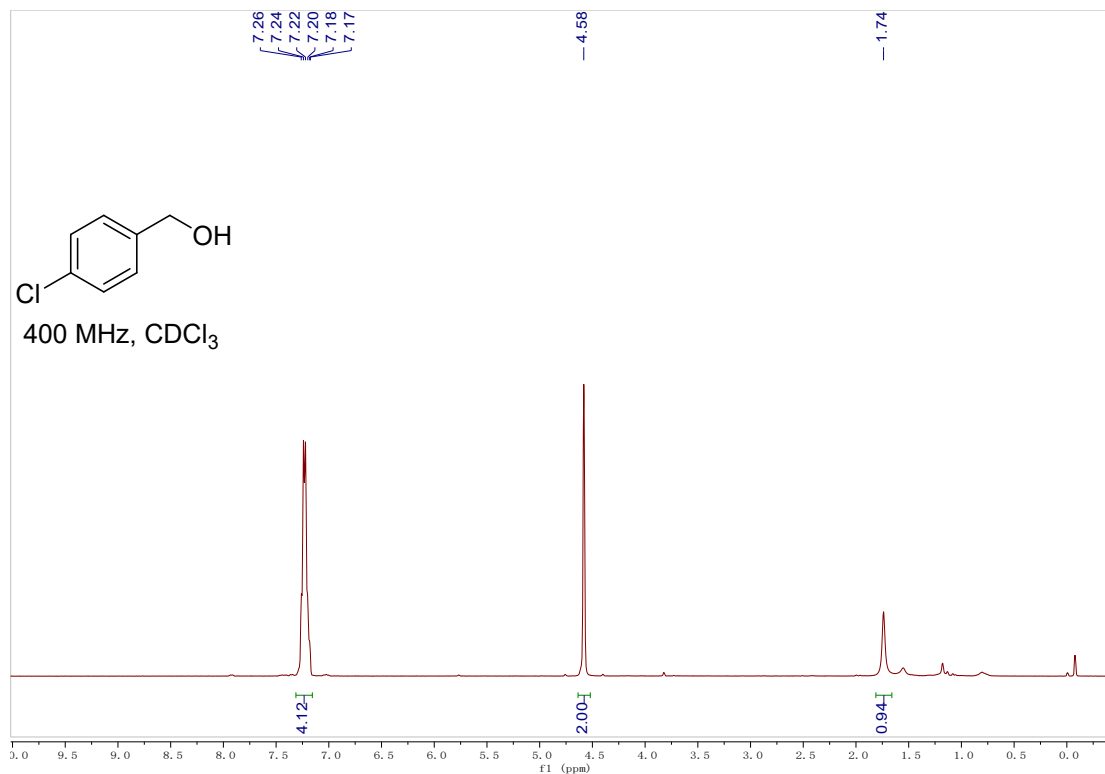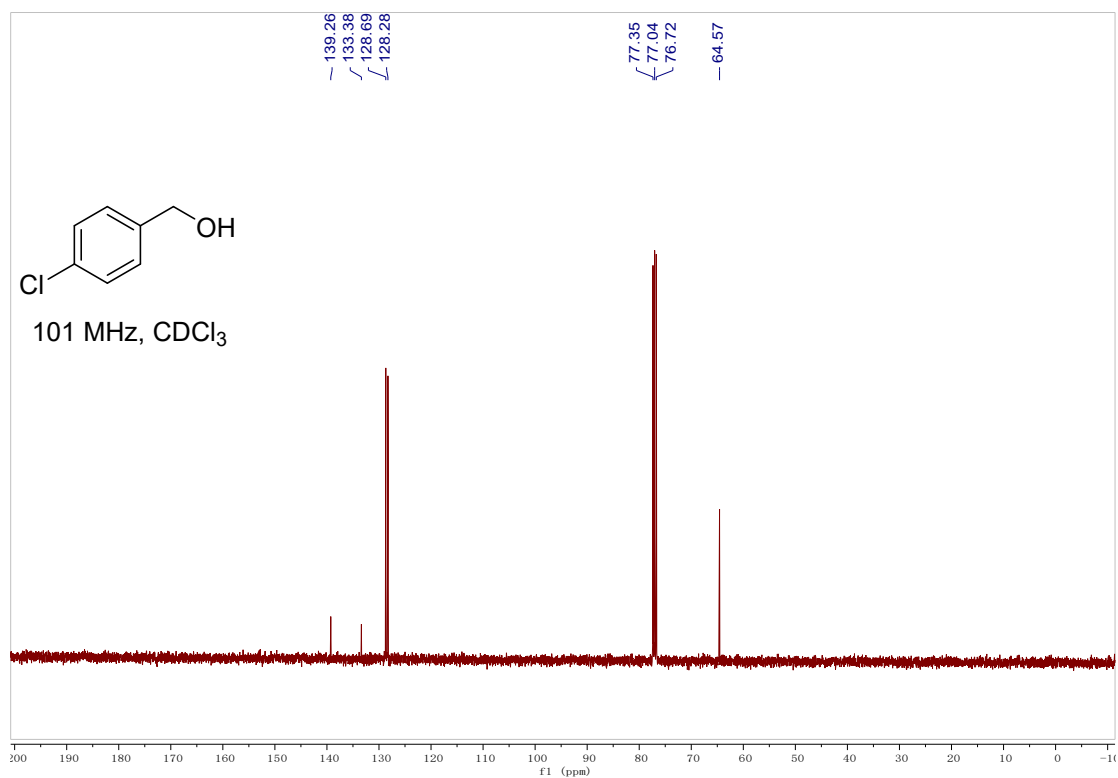

**(4-Bromophenyl)methanol (2af)**

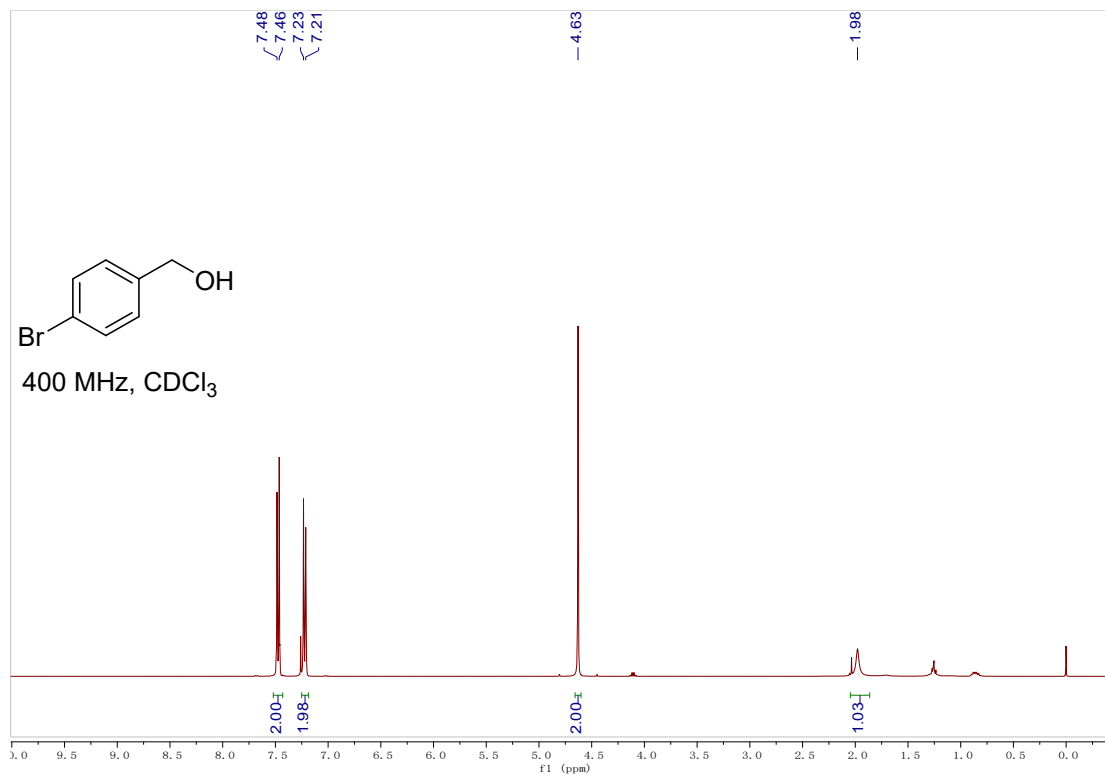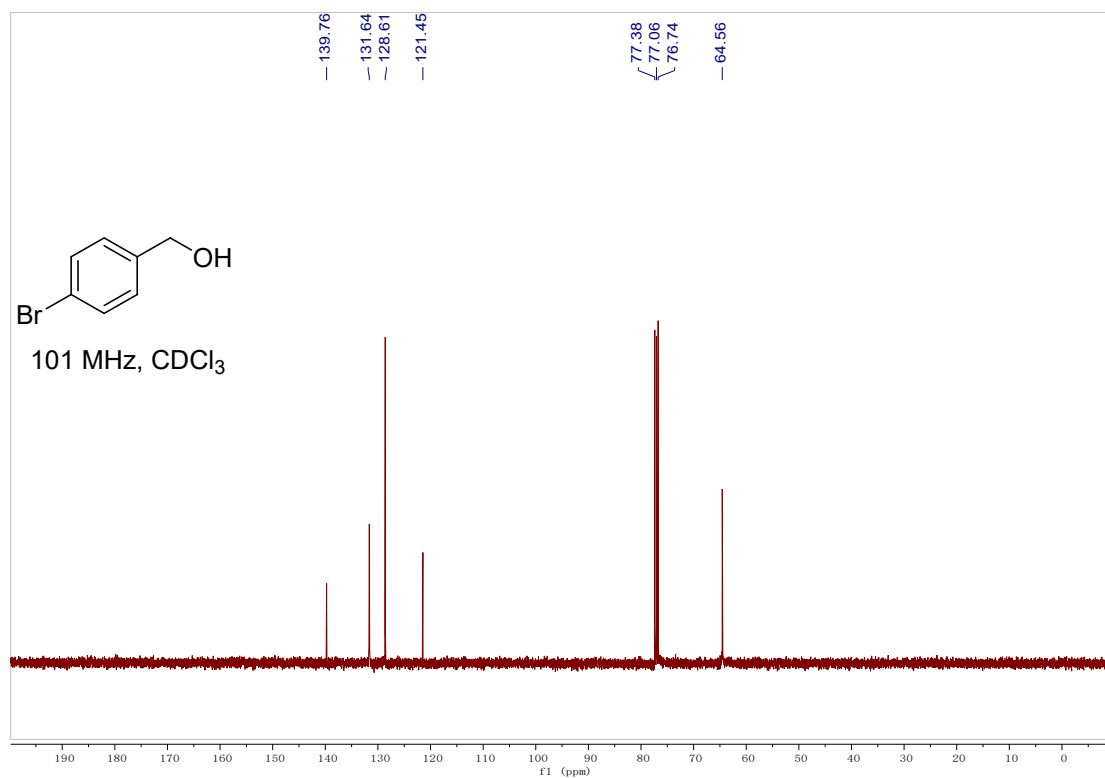

**Benzo[d][1,3]dioxol-5-ylmethanol (2ag)**

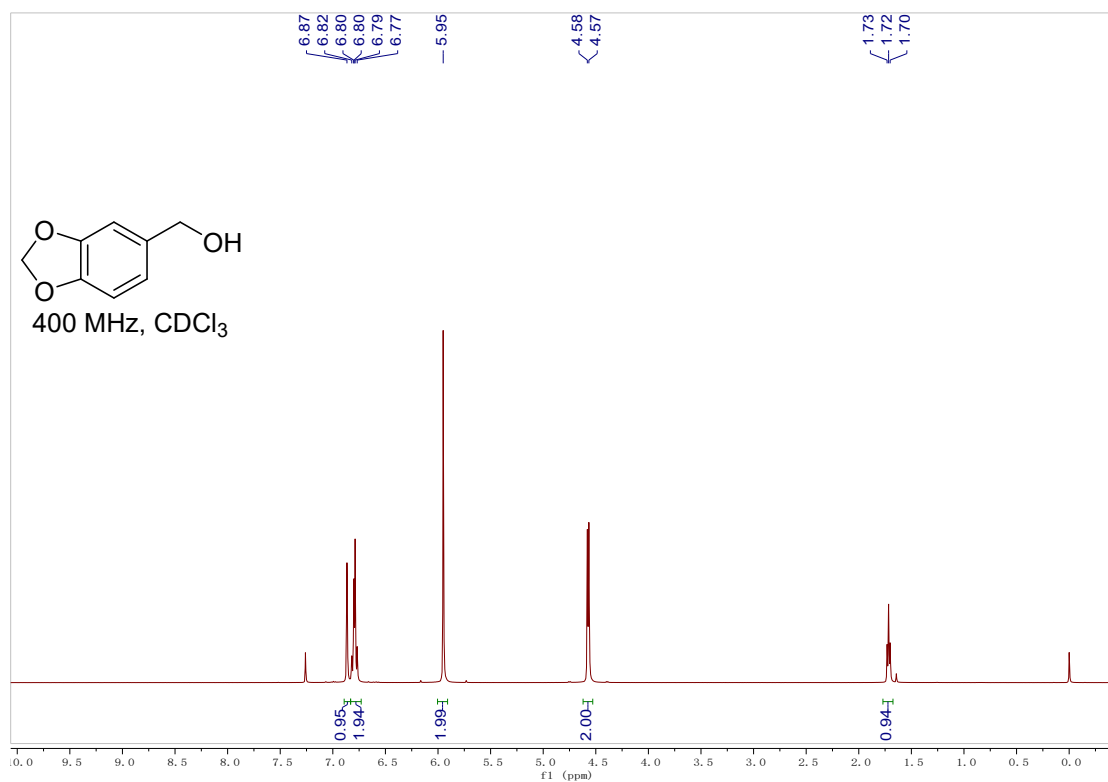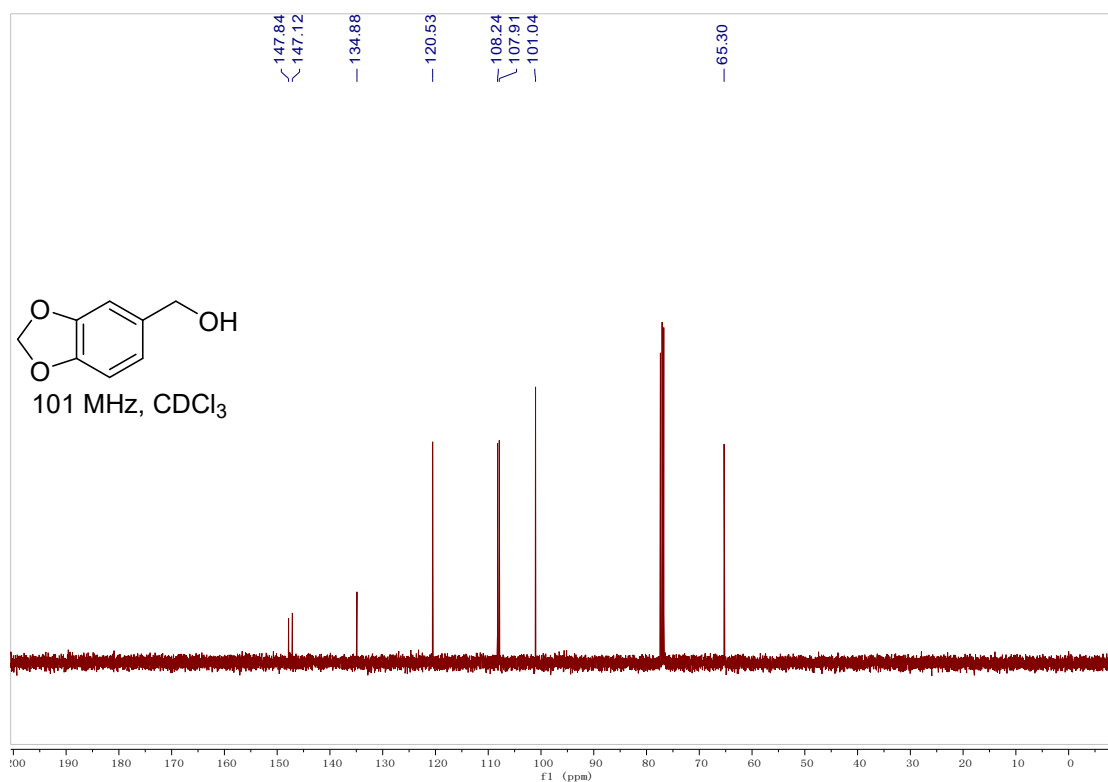



### Methyl 4-(hydroxymethyl-*d*<sub>2</sub>)benzoate (3a)

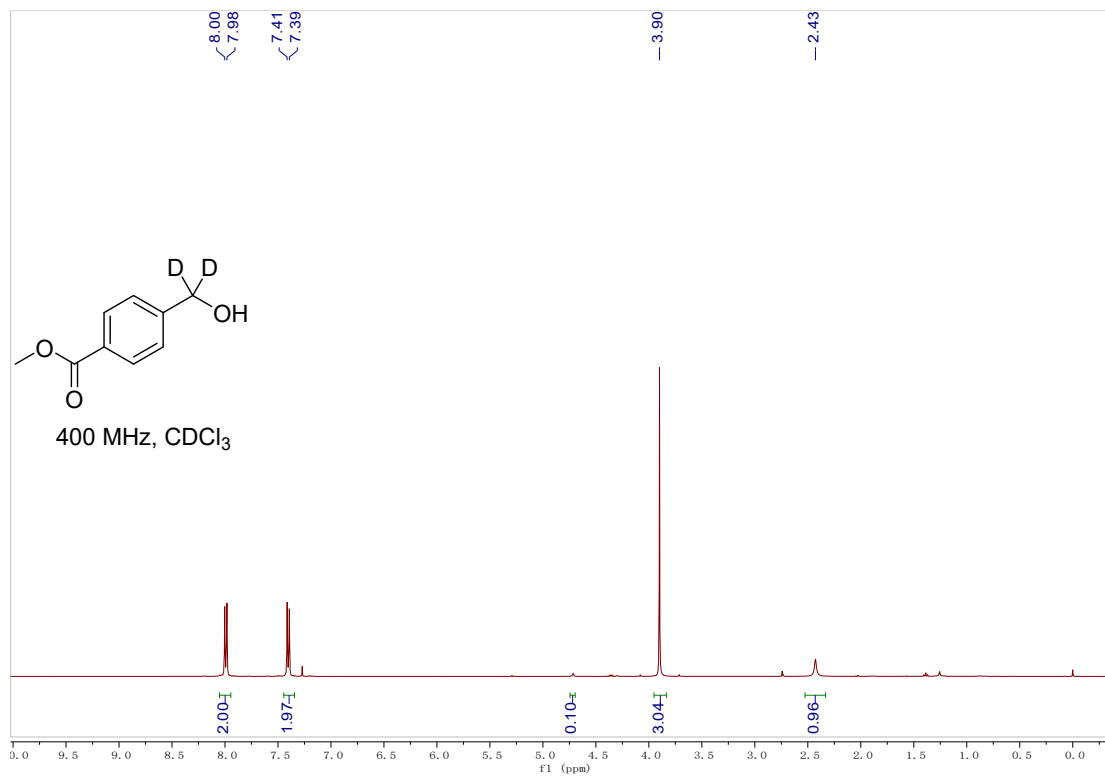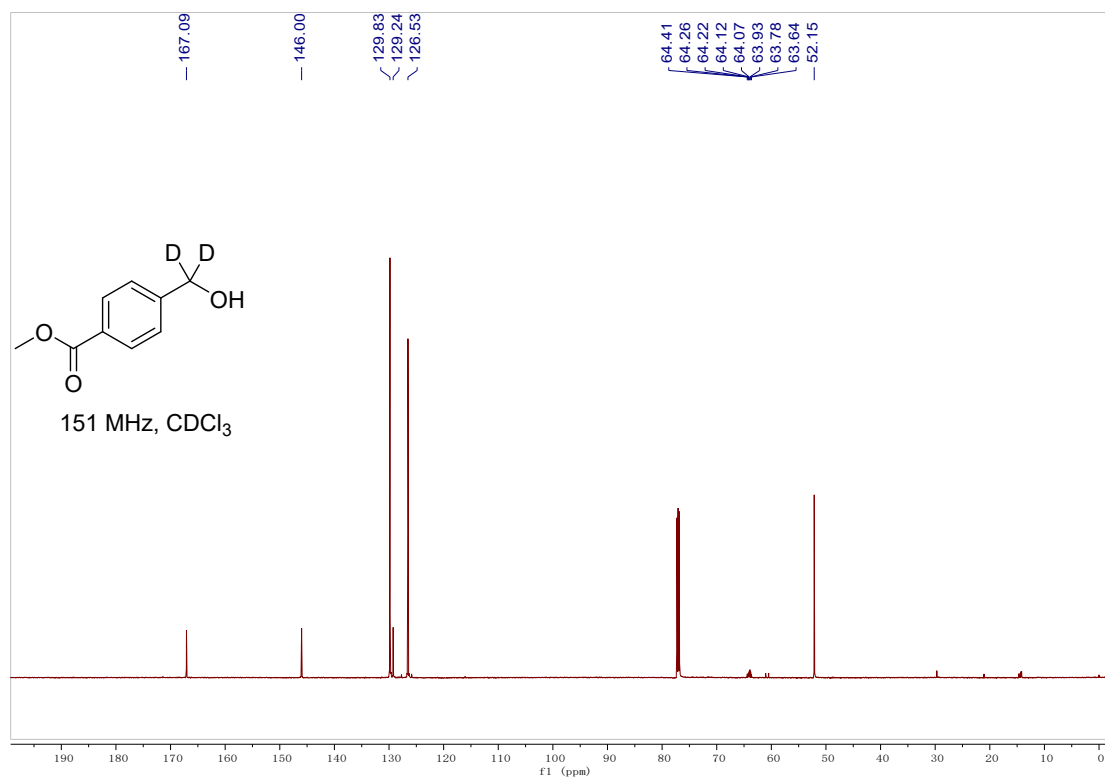

### 4-(Hydroxymethyl-*d*<sub>2</sub>)benzonitrile (3b)

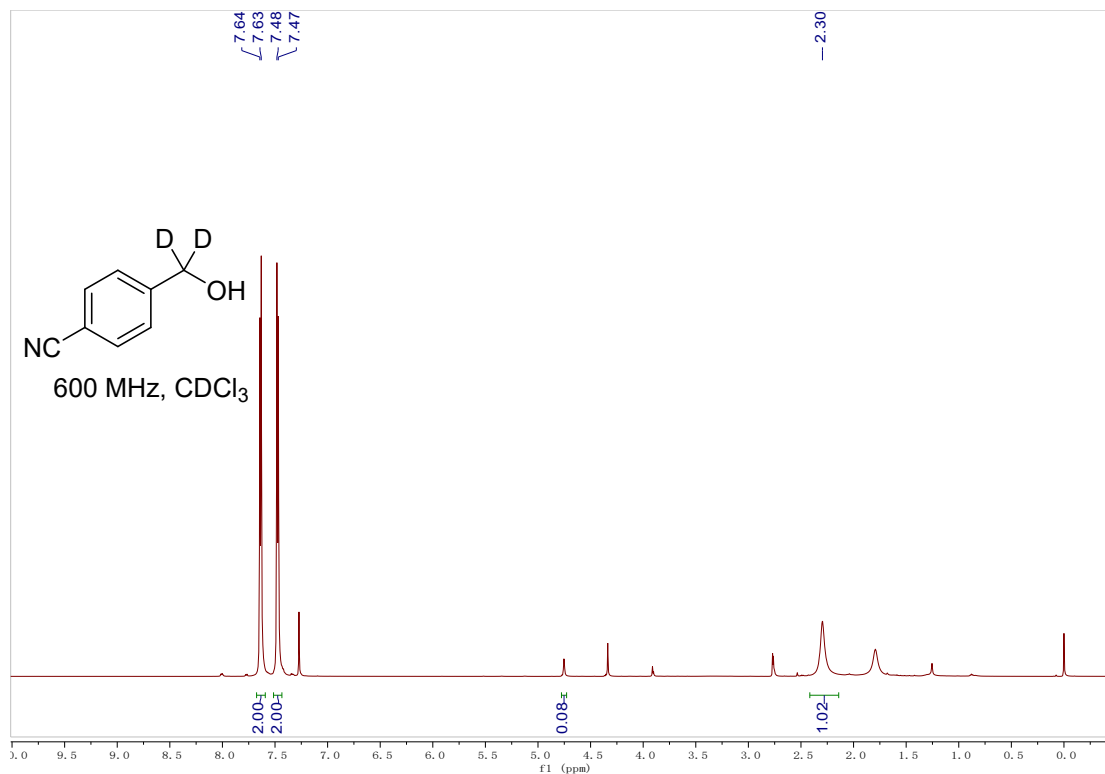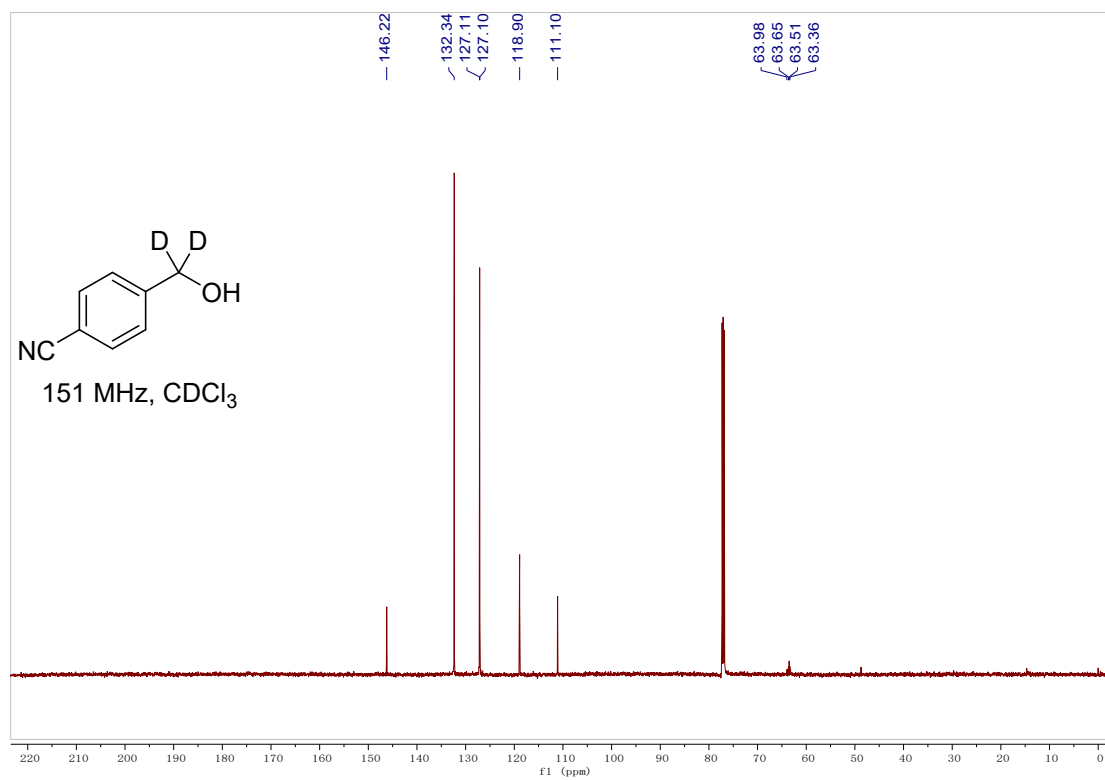

### 3-Fluoro-4-(hydroxymethyl-*d*<sub>2</sub>)benzonitrile (3c)

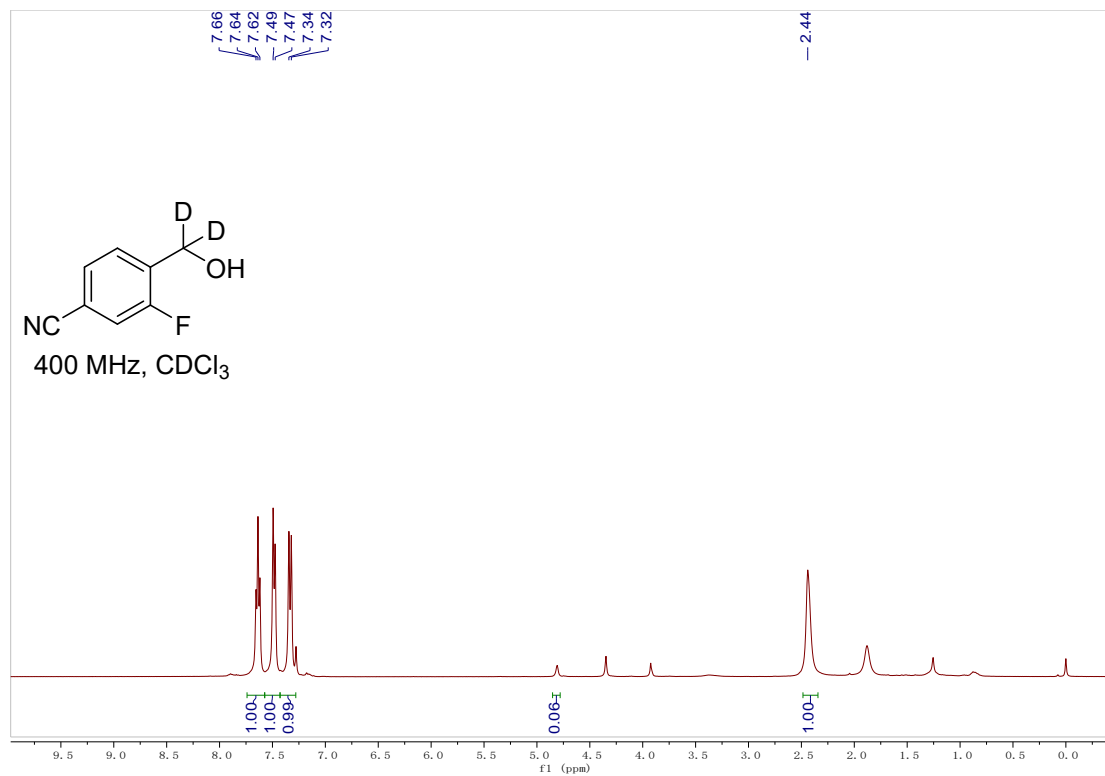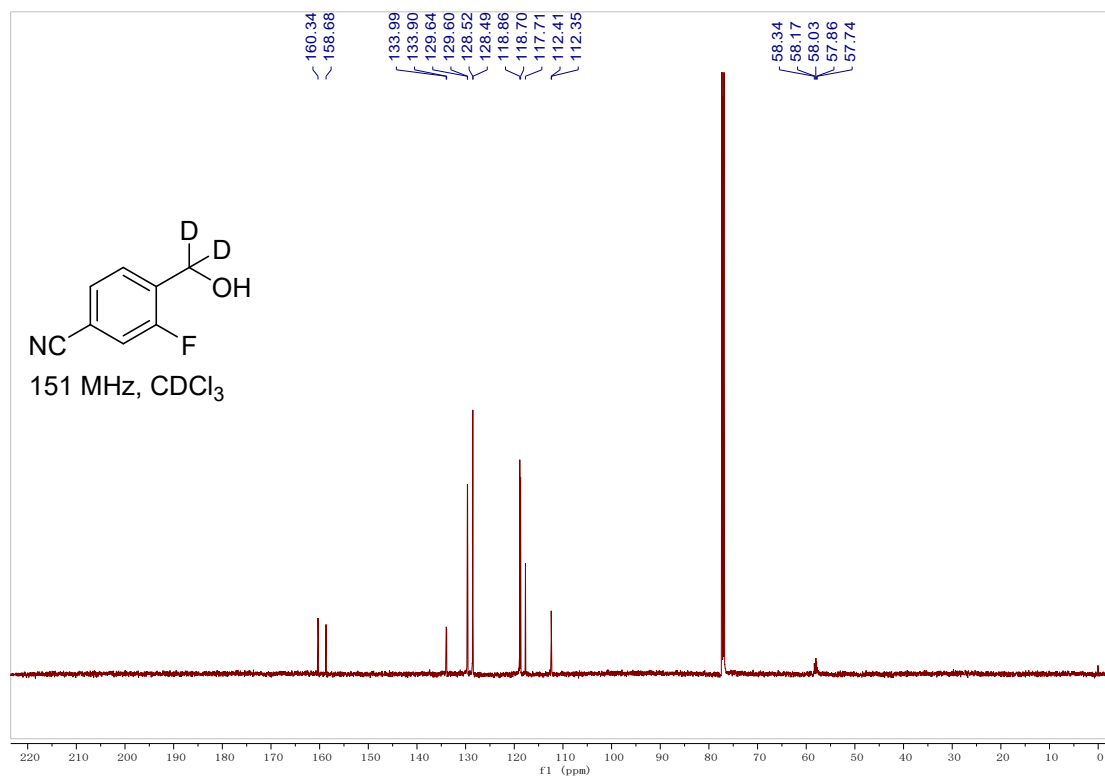

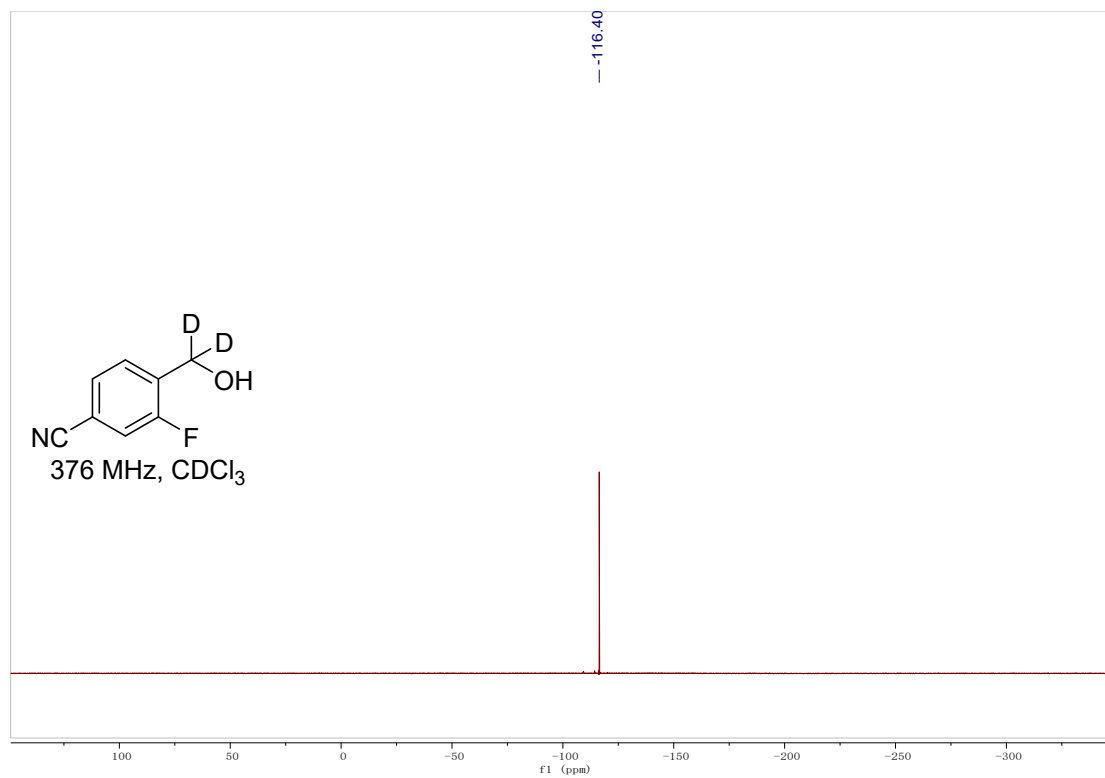

**(2-Fluorophenyl)methan-*d*<sub>2</sub>-ol (3d)**

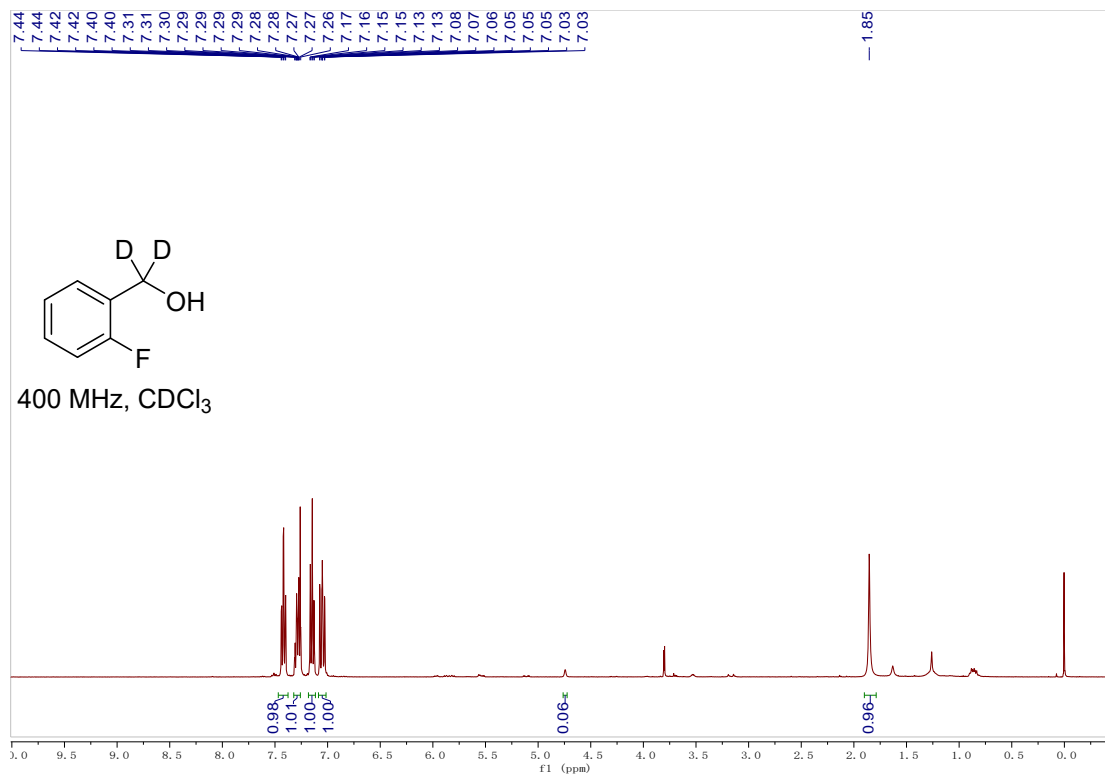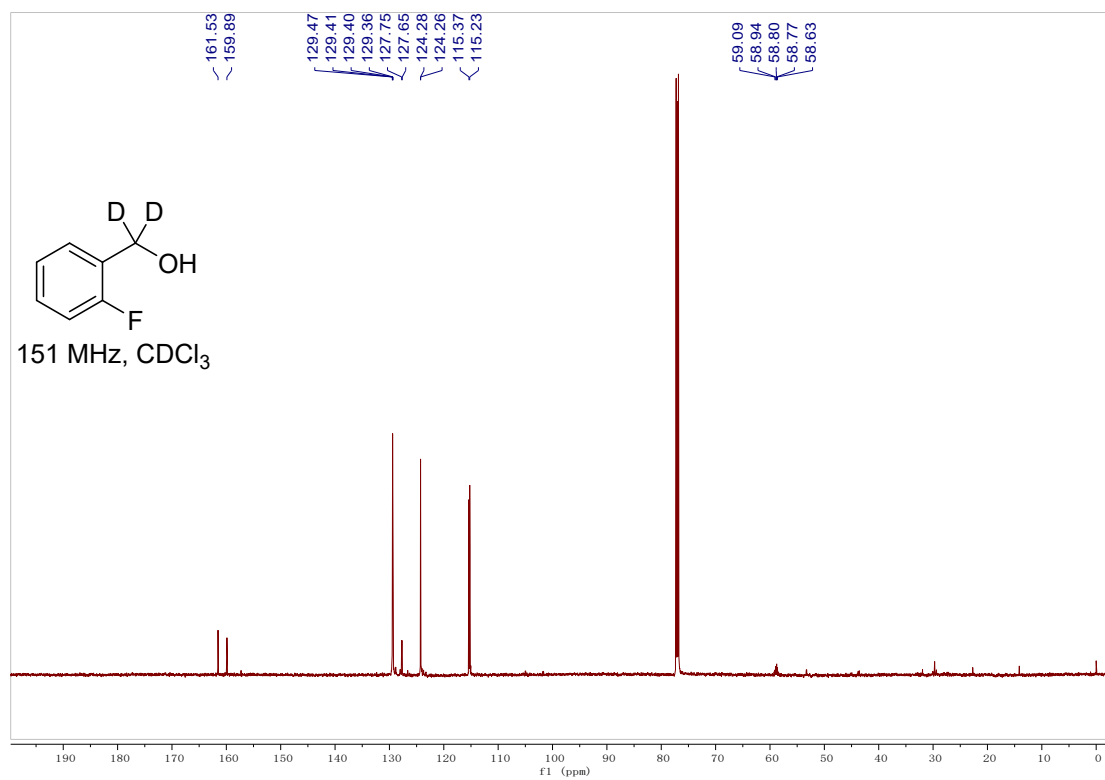

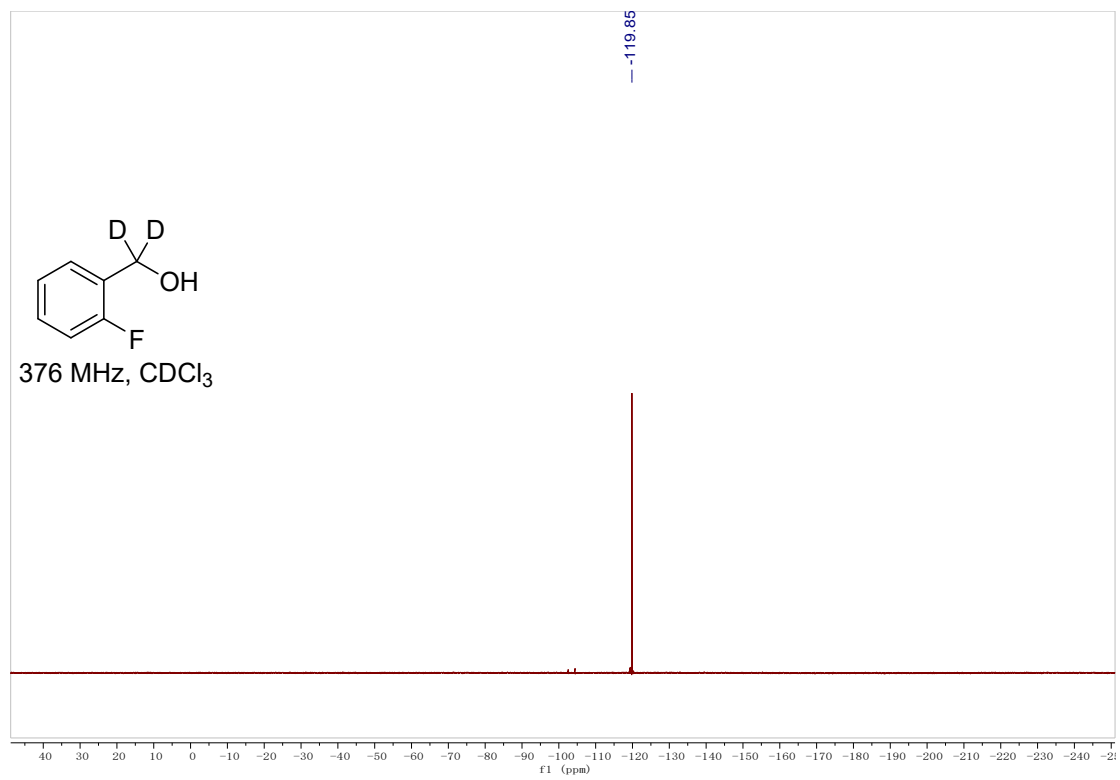

**(4-Bromophenyl)methan-*d*<sub>2</sub>-ol (3e)**

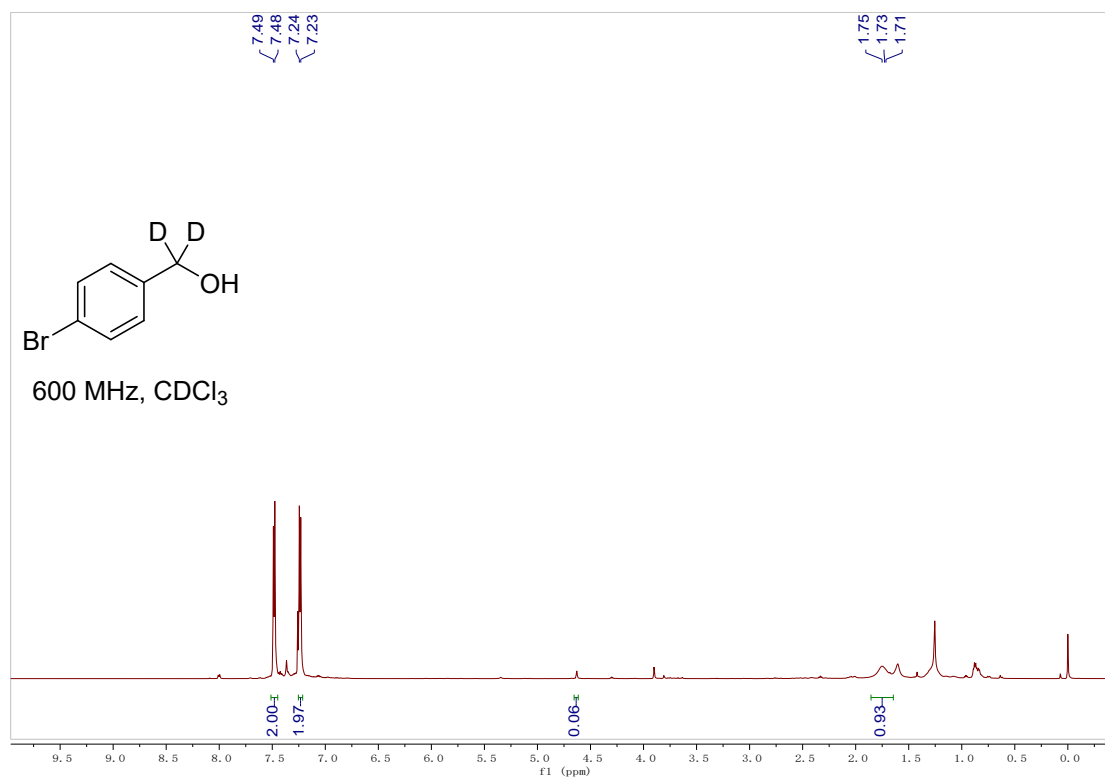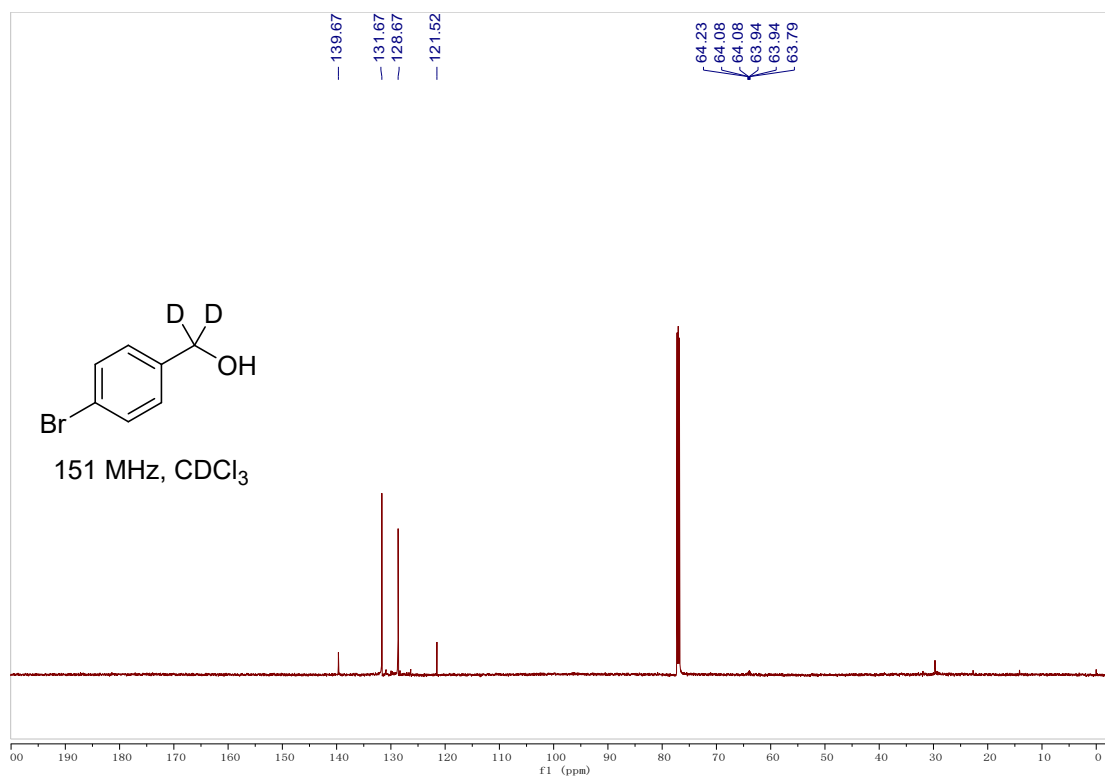

Phenylmethan-*d*<sub>2</sub>-ol (3f)

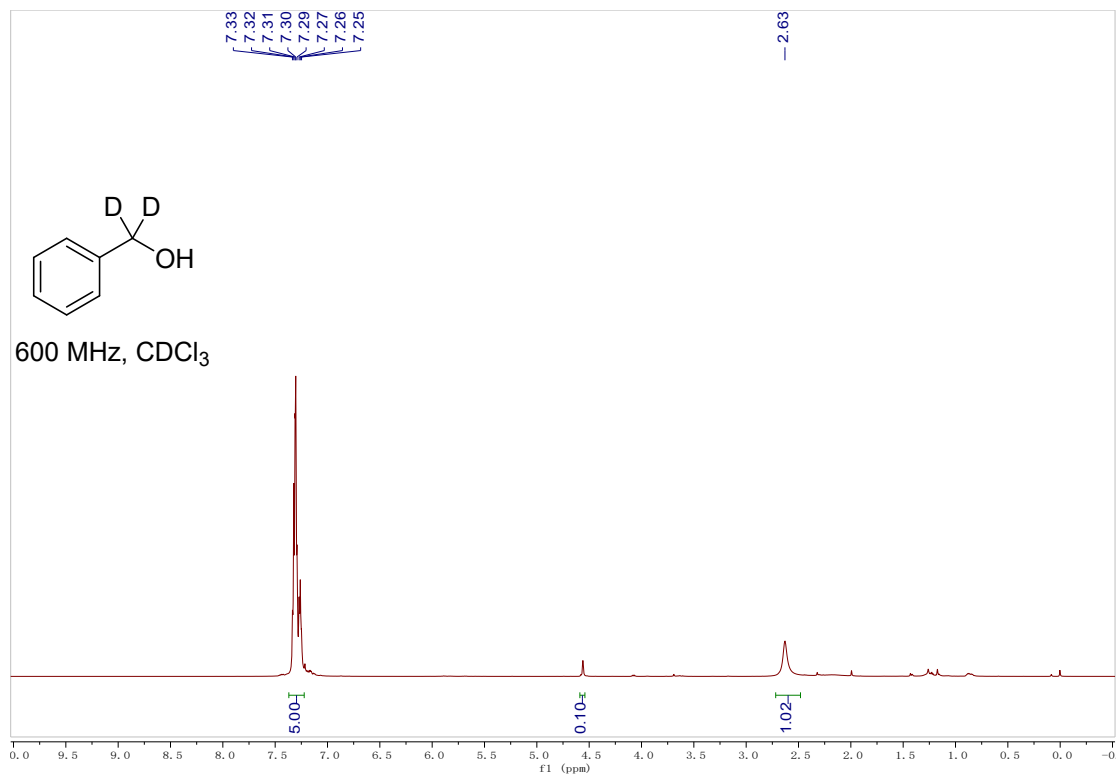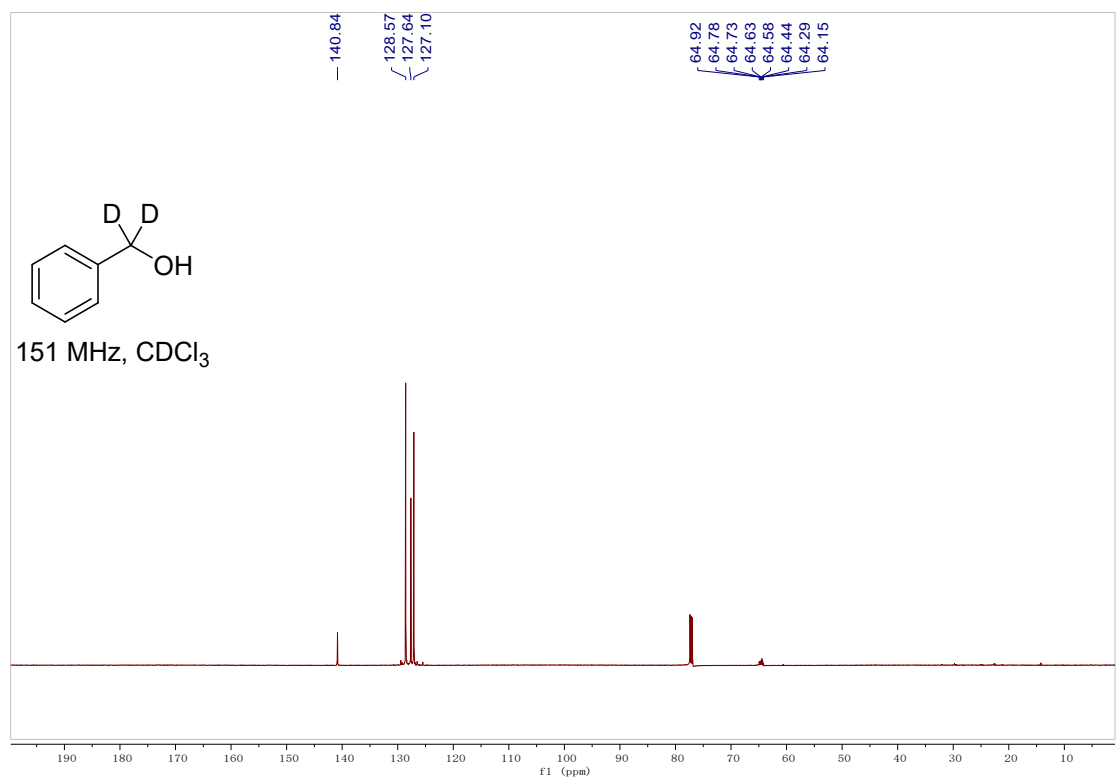



***p*-Tolymethan-*d*<sub>2</sub>-ol (3g)**

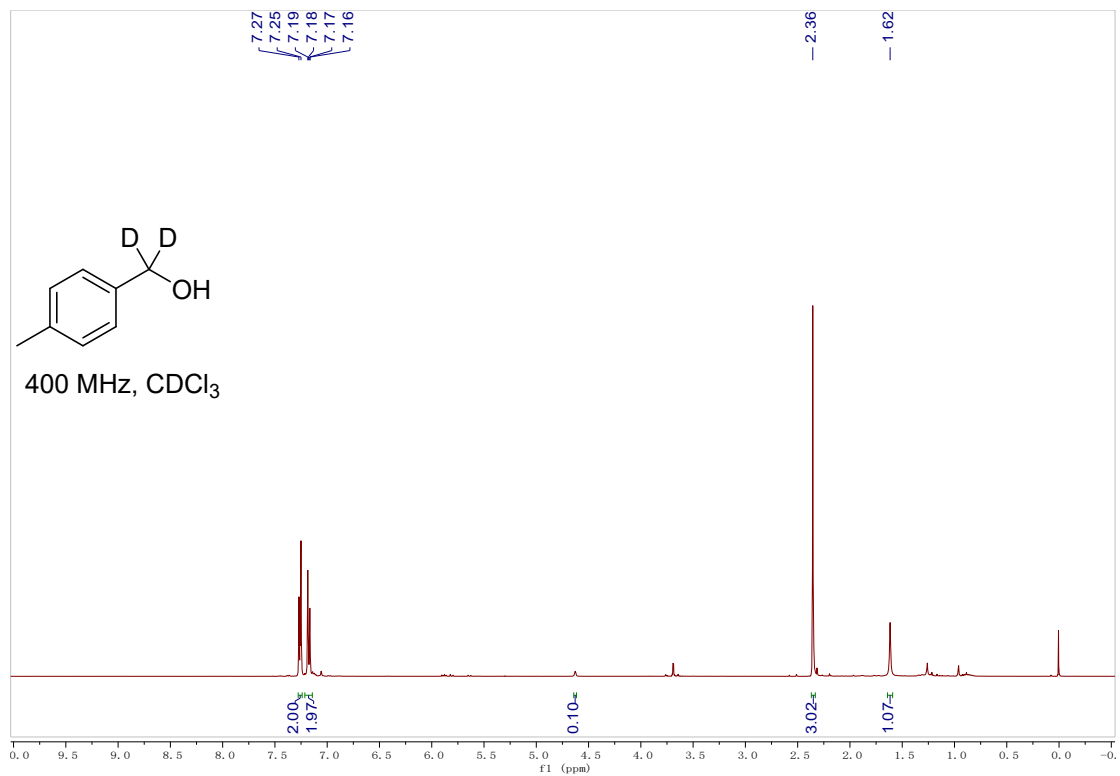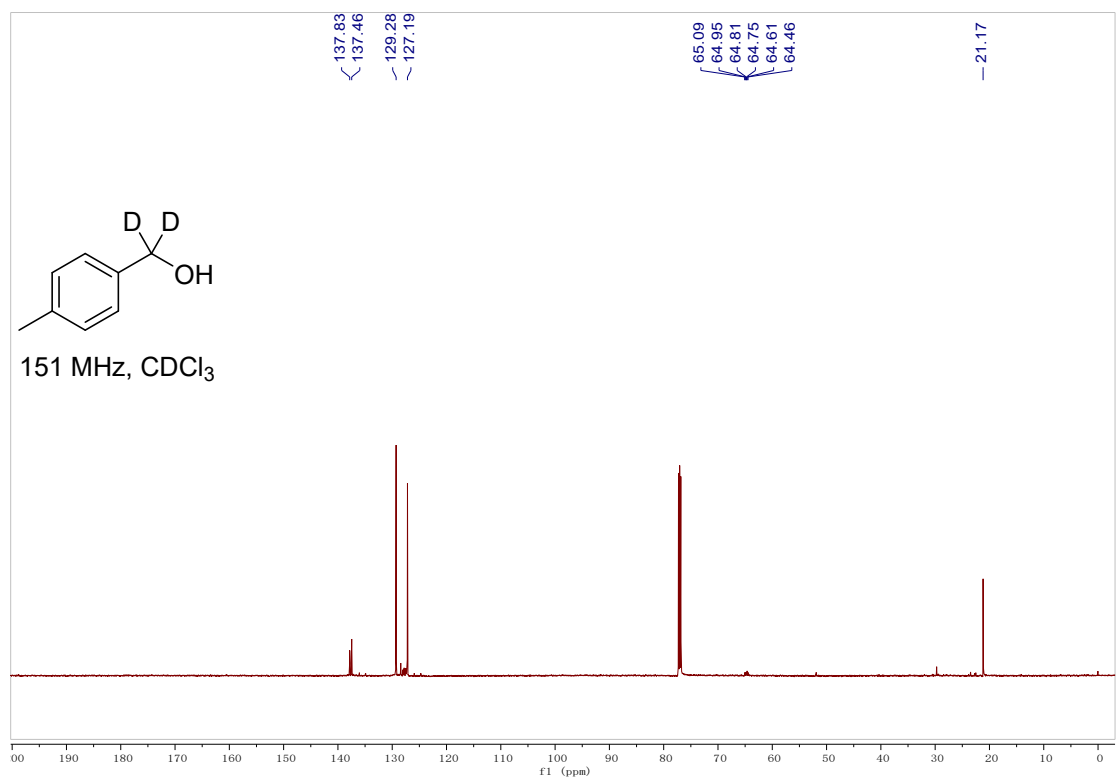

**(4-Methoxyphenyl)methan-*d*<sub>2</sub>-ol (3h)**

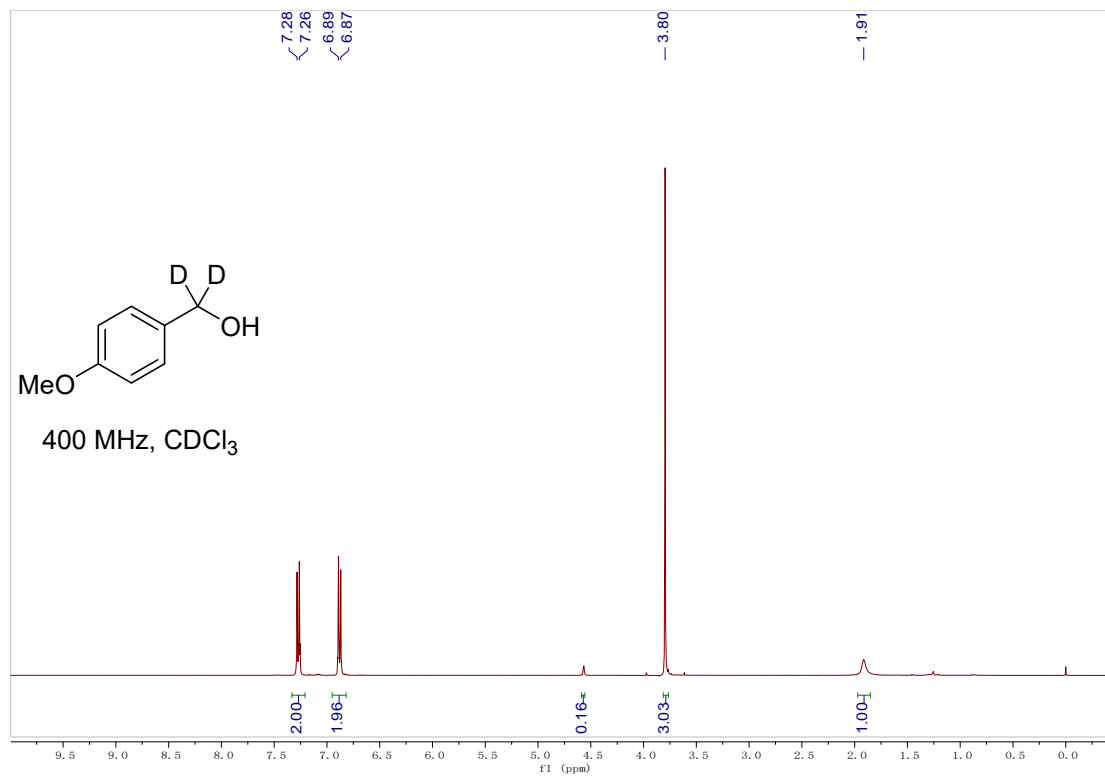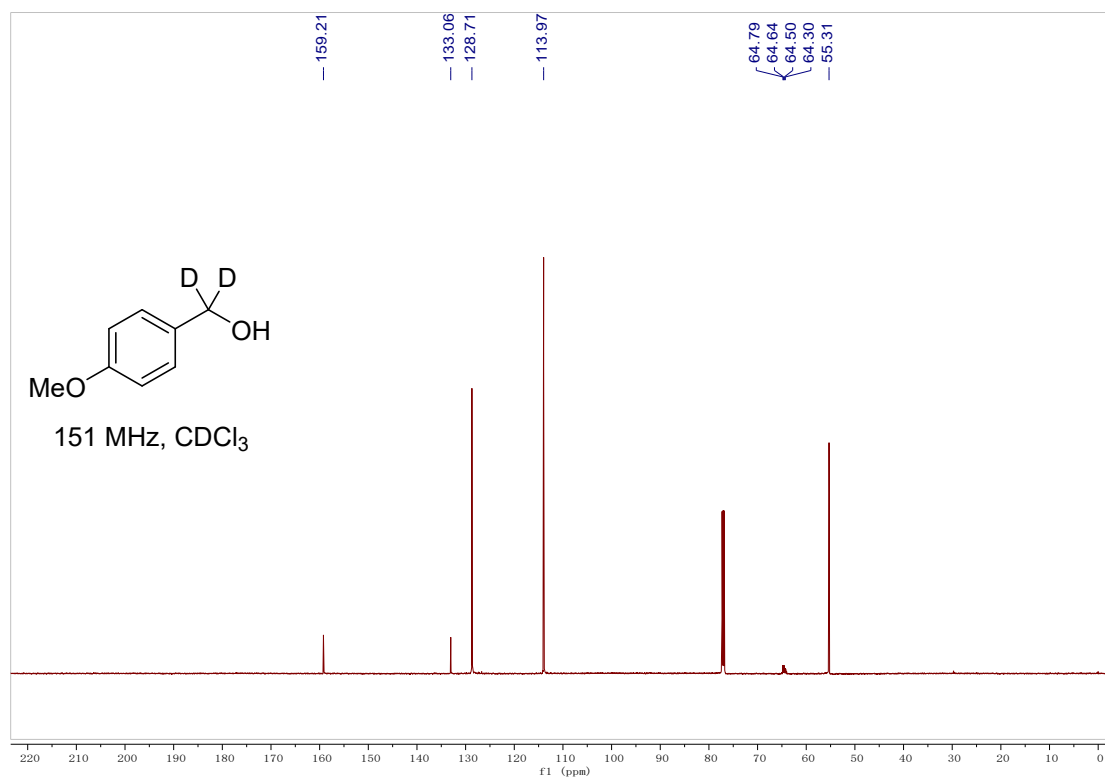

**N-(4-(2-chloroethoxy)-3-(hydroxymethyl-*d*<sub>2</sub>)phenyl)acetamide (3i)**

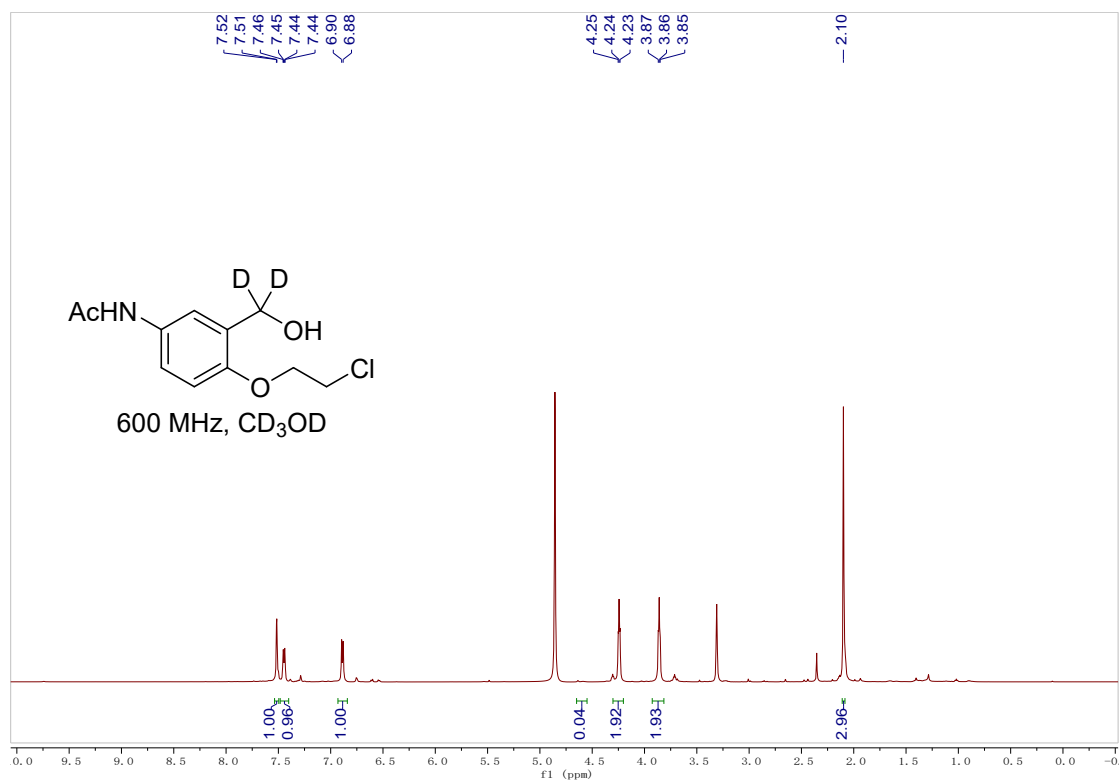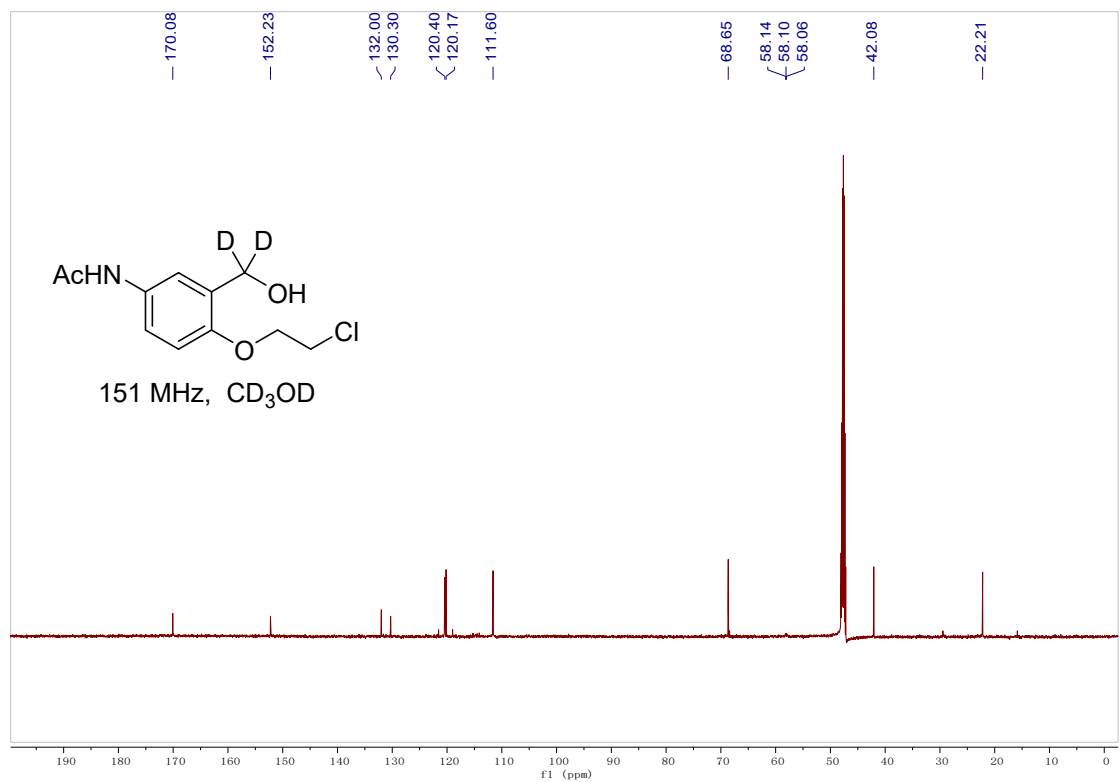

1
